# Supplementary material for: Synthesis of α-substituted indolylacetamide using acetonitriles as acetamide enolate equivalents through O-transfer reactions
Source: Royal Society of Chemistry journal article supplement (doi:10.1039/d1cc02821a), 2021-01-01

# Synthesis of $\alpha$ -Substituted Indolylacetamide using Acetonitriles as Acetamide Enolate Equivalents through *O*-Transfer Reactions

Takumi Abe\*, Kenta Noda, and Daisuke Sawada\*

Graduate School of Medicine, Dentistry and Pharmaceutical Sciences, Okayama University, 1-1-1  
Tsushima-naka,  
Kita-ku, Okayama 7008530, Japan  
E-mail: [t-abe@okayama-u.ac.jp](mailto:t-abe@okayama-u.ac.jp)  
[dsawada@okayama-u.ac.jp](mailto:dsawada@okayama-u.ac.jp)

## SUPPORTING INFORMATION

### Contents

|                                                                                              |               |
|----------------------------------------------------------------------------------------------|---------------|
| <b>1. General Experimental</b> -----                                                         | <b>S2</b>     |
| <b>2. Experimental Procedure</b> -----                                                       | <b>S2–21</b>  |
| <b>3. Supplementary References</b> -----                                                     | <b>S21</b>    |
| <b>4. Copies of <math>^1\text{H}</math> and <math>^{13}\text{C}</math> NMR spectra</b> ----- | <b>S21–91</b> |

## Experimental Section

### ■ *Mass-spectrometry*

High-resolution mass spectra were recorded with a Bruker micrOTOF mass spectrometers (ESI-TOF-MS).

### ■ *NMR spectroscopy*

NMR experiments were performed with a JEOL JNM-ECX600 spectrometer operating at 600 MHz and 151 MHz for  $^1\text{H}$  and  $^{13}\text{C}$  acquisitions, respectively. Chemical shifts are expressed in ppm ( $\delta$ ) using residual solvent as the internal reference. For  $^1\text{H}$  NMR:  $\text{CDCl}_3$ ,  $\delta$  7.25;  $\text{DMSO-}d_6$ ,  $\delta$  2.50;  $\text{acetone-}d_6$ ,  $\delta$  2.02; For  $^{13}\text{C}$  NMR:  $\text{CDCl}_3$ ,  $\delta$  77.1;  $\text{DMSO-}d_6$ ,  $\delta$  39.5;  $\text{acetone-}d_6$ ,  $\delta$  29.1. NMR peak are reported as follows: s = singlet, d = doublet, t = triplet, q = quartet, m = multiplet, dd = doublet of doublets, ddd = doublet of doublet of doublets, td = triplet of doublets, br s = broad singlet; coupling constants in Hz; integration.

### ■ *Chromatography*

Reactions were monitored by thin layer chromatography (TLC) carried out on a silica gel plates (60F-254) and visualized under UV illumination at 254 or 366 nm depending on the compounds. Column chromatography was performed on silica gel (WAKO Gel 75–150 mesh, WAKO Co., Ltd.).

### ■ *Starting materials*

The HITABs (2-hydroxyindoline-3-triethylammonium bromides, **1**) were prepared by reported methods.<sup>S1-2</sup>

All substrates were used as received from commercial suppliers (Sigma-Aldrich, TCI, and Wako) and all reagents were weighed and handled in air at room temperature.

## Synthesis of 2-hydroxyindoline-3-triethylammonium bromides (1)

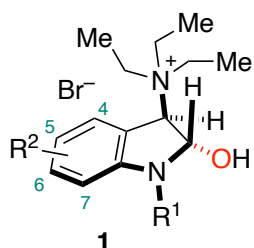

**1a:** R<sup>1</sup> = Ts, R<sup>2</sup> = H  
**1b:** R<sup>1</sup> = Ts, R<sup>2</sup> = 5-MeO  
**1c:** R<sup>1</sup> = Ts, R<sup>2</sup> = 5-Cl  
**1d:** R<sup>1</sup> = Ts, R<sup>2</sup> = 5-Br  
**1e:** R<sup>1</sup> = Ts, R<sup>2</sup> = 5-F

**1f:** R<sup>1</sup> = Ts, R<sup>2</sup> = 4-F  
**1g:** R<sup>1</sup> = Ts, R<sup>2</sup> = 6-F  
**1h:** R<sup>1</sup> = Ts, R<sup>2</sup> = 7-F  
**1i:** R<sup>1</sup> = Bs, R<sup>2</sup> = H

### *trans*-5-fluoro-2-Hydroxy-1-tosylindoline-3-ammonium bromide (1e)

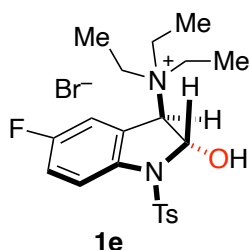

To a solution of 5-fluoro-1-tosylindole (578.7 mg, 2 mmol) and H<sub>2</sub>O (0.36 mL, 20 mmol) in acetone (10 mL) was added NBS (355.9 mg, 2.0 mmol). The mixture was stirred at room temperature until the complete disappearance of starting material as indicated by TLC. Et<sub>3</sub>N (0.28 mL, 2.0 mmol) was added to the mixture and stirred further 16 h. The resulting precipitate was separated by filtration, washed with acetone, and dried *in vacuo* to give **1e** (707.3 mg, 73% yield).

707.3 mg, 73% yield. colorless solid; mp: 121.6-124.3 °C; <sup>1</sup>H NMR (600 MHz, DMSO-*d*<sub>6</sub>) δ: 8.01 (d, *J* = 8.4 Hz, 2H), 7.45 (dd, *J* = 1.8, 9.0 Hz, 1H), 7.39 (d, *J* = 9.0 Hz, 2H), 7.30-7.37 (m, 2H), 6.37 (s, 1H), 4.85 (s, 1H), 3.33-3.48 (m, 6H), 2.33 (s, 3H), 1.00 (t, *J* = 6.6 Hz, 9H); <sup>13</sup>C NMR (151 MHz, DMSO-*d*<sub>6</sub>) δ: 180.0, 158.6 (d, *J*<sub>C-F</sub> = 241.5 Hz), 145.5, 139.3, 130.5, 128.2, 122.2 (d, *J*<sub>C-F</sub> = 8.8 Hz), 119.8 (d, *J*<sub>C-F</sub> = 23.1 Hz), 117.8 (d, *J*<sub>C-F</sub> = 23.1 Hz), 114.9 (d, *J*<sub>C-F</sub> = 8.8 Hz), 85.2, 79.8, 75.0, 53.4, 46.1, 30.1, 21.5, 9.3, 8.8; HRMS (ESI) *m/z*: 407.1805 (Calcd for C<sub>21</sub>H<sub>28</sub>FN<sub>2</sub>O<sub>3</sub>S [M]<sup>+</sup>: 407.1805).

### *trans*-4-fluoro-2-Hydroxy-1-tosylindoline-3-ammonium bromide (1f)

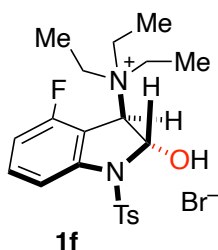

To a solution of 5-fluoro-1-tosylindole (578.7 mg, 2 mmol) and H<sub>2</sub>O (0.36 mL, 20 mmol) in acetone (10 mL) was added NBS (355.9 mg, 2.0 mmol). The mixture was stirred at room temperature until the complete disappearance of starting material as indicated by TLC. Et<sub>3</sub>N (0.28 mL, 2.0 mmol) was added to the mixture and stirred further 16 h. The resulting precipitate was separated by filtration, washed with acetone, and dried *in vacuo* to give **1e** (483.6 mg,

50% yield).

483.6 mg, 50% yield. colorless solid; mp: 130.6-134.7 °C; <sup>1</sup>H NMR (600 MHz, DMSO-*d*<sub>6</sub>) δ: 8.03 (d, *J* = 9.0 Hz, 2H), 7.54-7.57 (m, 1H), 7.42 (d, *J* = 8.4 Hz, 2H), 7.02 (t, *J* = 9.0 Hz, 1H), 6.37 (d, *J* = 8.4 Hz, 1H), 4.92 (s, 1H), 3.33-3.46 (m, 6H), 2.34 (s, 3H), 1.08 (t, *J* = 7.2 Hz, 9H); <sup>13</sup>C NMR (151 MHz, DMSO-*d*<sub>6</sub>) δ: 180.0, 160.7 (d, *J*<sub>C-F</sub> = 251.6 Hz), 145.7, 145.2 (d, *J*<sub>C-F</sub> = 5.9 Hz), 136.0 (d, *J*<sub>C-F</sub> = 10.1 Hz), 135.8, 130.5, 128.4, 111.7 (d, *J*<sub>C-F</sub> = 23.1 Hz), 110.0, 107.7 (d, *J*<sub>C-F</sub> = 17.4 Hz), 85.7, 79.7, 73.1, 54.0, 46.2, 30.1, 21.6, 9.1, 9.0; HRMS (ESI) *m/z*: 407.1803 (Calcd for C<sub>21</sub>H<sub>28</sub>FN<sub>2</sub>O<sub>3</sub>S [M]<sup>+</sup>: 407.1805).

### ***trans*-6-fluoro-2-Hydroxy-1-tosylindoline-3-ammonium bromide (1g)**

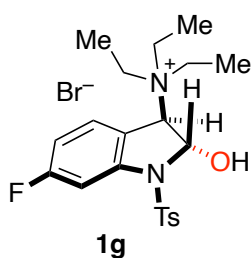

To a solution of 5-fluoro-1-tosylindole (578.7 mg, 2 mmol) and H<sub>2</sub>O (0.36 mL, 20 mmol) in acetone (10 mL) was added NBS (355.9 mg, 2.0 mmol). The mixture was stirred at room temperature until the complete disappearance of starting material as indicated by TLC. Et<sub>3</sub>N (0.28 mL, 2.0 mmol) was added to the mixture and stirred further 1 h. Then, Et<sub>2</sub>O (10 mL) was added to the mixture at 0 °C and stirred further 1h. The resulting precipitate was separated by filtration, washed with acetone/Et<sub>2</sub>O (1/1), and dried *in vacuo* to give **1g** (683.9 mg, 70% yield).

683.9 mg, 70% yield. colorless solid; mp: 152.0-155.0 °C; <sup>1</sup>H NMR (600 MHz, DMSO-*d*<sub>6</sub>) δ: 7.93 (m, 2H), 7.48 (m, 1H), 7.20 (m, 2H), 6.96 (m, 1H), 6.64 (m, 1H), 6.53-6.54 (m, 1H), 4.99-5.00 (m, 1H), 3.44-3.47 (m, 6H), 2.25, 2.26, 2.27 (3s, 3H), 1.17-1.29 (m, 9H); <sup>13</sup>C NMR (151 MHz, DMSO-*d*<sub>6</sub>) δ: 178.6, 178.5, 165.3 (d, *J*<sub>C-F</sub> = 251.6 Hz), 145.3, 145.2 (d, *J*<sub>C-F</sub> = 11.7 Hz), 135.4, 131.2 (d, *J*<sub>C-F</sub> = 11.6 Hz), 130.2, 130.1, 130.0, 129.9, 129.8, 128.2, 127.9, 127.7, 127.5, 127.4, 115.1, 110.9 (d, *J*<sub>C-F</sub> = 23.1 Hz), 102.0 (d, *J*<sub>C-F</sub> = 27.5 Hz), 84.9, 75.1, 53.7, 46.3, 31.0, 29.7, 21.7, 9.1, 8.8; HRMS (ESI) *m/z*: 407.1806 (Calcd for C<sub>21</sub>H<sub>28</sub>FN<sub>2</sub>O<sub>3</sub>S [M]<sup>+</sup>: 407.1805).

### ***trans*-7-fluoro-2-Hydroxy-1-tosylindoline-3-ammonium bromide (1h)**

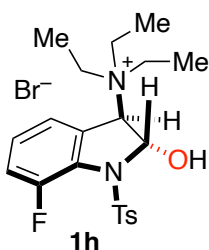

To a solution of 5-fluoro-1-tosylindole (578.7 mg, 2 mmol) and H<sub>2</sub>O (0.36 mL, 20 mmol) in acetone (10 mL) was added NBS (355.9 mg, 2.0 mmol). The mixture was stirred at room temperature until the complete disappearance of starting material as indicated by TLC. Et<sub>3</sub>N (0.28 mL, 2.0 mmol) was added to the mixture and stirred further 1 h. Then, Et<sub>2</sub>O (5 mL) was added to the mixture at room temperature and stirred further 1h. The resulting precipitate was



separated by filtration, washed with acetone/Et<sub>2</sub>O (1/1), and dried *in vacuo* to give **1h** (828.6 mg, 85% yield). 828.6 mg, 85% yield. colorless solid; mp: 159.7-161.7 °C; <sup>1</sup>H NMR (600 MHz, DMSO-*d*<sub>6</sub>) δ: 8.22 (br s, 1H), 7.92 (d, *J* = 7.8 Hz, 2H), 7.47 (d, *J* = 7.8 Hz, 1H), 7.44 (d, *J* = 7.8 Hz, 2H), 7.33-7.38 (m, 1H), 7.19-7.24 (m, 1H), 6.53 (s, 1H), 4.90 (s, 1H), 3.50-3.61 (m, 6H), 2.38 (s, 3H), 1.17 (t, *J* = 7.2 Hz, 9H); <sup>13</sup>C NMR (151 MHz, DMSO-*d*<sub>6</sub>) δ: 150.2 (d, *J*<sub>C-F</sub> = 250.2 Hz), 144.8, 137.7, 130.5 (d, *J*<sub>C-F</sub> = 11.6 Hz), 130.3, 127.6, 126.8, 126.3 (d, *J*<sub>C-F</sub> = 5.7 Hz), 125.5, 120.5 (d, *J*<sub>C-F</sub> = 18.9 Hz), 86.0, 74.5, 53.7, 46.1, 21.6, 9.1, 9.0; HRMS (ESI) *m/z*: 407.1788 (Calcd for C<sub>21</sub>H<sub>28</sub>FN<sub>2</sub>O<sub>3</sub>S [M]<sup>+</sup>: 407.1805).

## ■ Optimization of Reaction Conditions

**Table S1 Optimization of telescoping reaction conditions <sup>a</sup>**

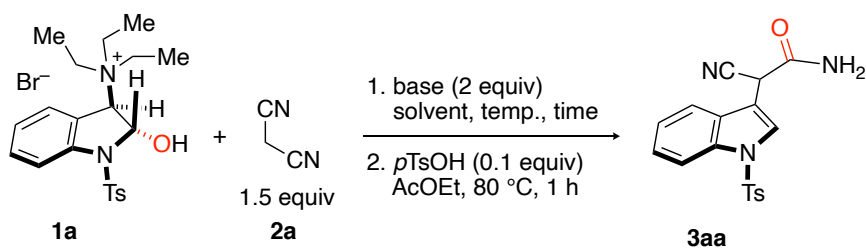

| run                   | base                            | solvent                             | temp. (° C) | time (h)  | yield (%) <sup>b</sup> |
|-----------------------|---------------------------------|-------------------------------------|-------------|-----------|------------------------|
| 1                     | Et <sub>3</sub> N               | AcOEt                               | 80          | 2         | 71                     |
| 2                     | Et <sub>3</sub> N               | THF                                 | 80          | 2         | 73                     |
| 3                     | Et <sub>3</sub> N               | 1,4-dioxane                         | 80          | 2         | 52                     |
| 4                     | Et <sub>3</sub> N               | DME                                 | 80          | 2         | 58                     |
| 5                     | Et <sub>3</sub> N               | CPME                                | 80          | 2         | 47                     |
| 6                     | Et <sub>3</sub> N               | toluene                             | 80          | 2         | 61                     |
| 7                     | Et <sub>3</sub> N               | benzene                             | 80          | 2         | 68                     |
| <b>8</b>              | <b>Et<sub>3</sub>N</b>          | <b>ClC<sub>6</sub>H<sub>5</sub></b> | <b>80</b>   | <b>2</b>  | <b>88</b>              |
| 9                     | Et <sub>3</sub> N               | DCM                                 | 50          | 2         | 0                      |
| 10                    | Et <sub>3</sub> N               | DCE                                 | 80          | 2         | 81                     |
| 11                    | Et <sub>3</sub> N               | CHCl <sub>3</sub>                   | 80          | 2         | 72                     |
| 12                    | Et <sub>3</sub> N               | DMSO                                | 80          | 2         | 70                     |
| 13                    | Et <sub>3</sub> N               | DMF                                 | 80          | 2         | 83                     |
| 14                    | <i>i</i> Pr <sub>2</sub> NEt    | ClC <sub>6</sub> H <sub>5</sub>     | 80          | 2         | 68                     |
| 15                    | pyridine                        | ClC <sub>6</sub> H <sub>5</sub>     | 80          | 2         | 51                     |
| 16                    | DMAP                            | ClC <sub>6</sub> H <sub>5</sub>     | 80          | 2         | 7                      |
| 17                    | NaOH                            | ClC <sub>6</sub> H <sub>5</sub>     | 80          | 2         | 58                     |
| 18                    | KOH                             | ClC <sub>6</sub> H <sub>5</sub>     | 80          | 2         | 50                     |
| 19                    | Cs <sub>2</sub> CO <sub>3</sub> | ClC <sub>6</sub> H <sub>5</sub>     | 80          | 2         | 14                     |
| <b>20<sup>c</sup></b> | -----                           | <b>ClC<sub>6</sub>H<sub>5</sub></b> | <b>80</b>   | <b>19</b> | <b>92</b>              |

<sup>a</sup> **1a** (0.5 mmol), malononitrile **2a** (0.75 mmol), and base (1.0 mmol) in solvent (5 mL). <sup>b</sup> Isolated yields. <sup>c</sup> Without performing 2<sup>nd</sup> step (*p*TsOH, AcOEt, 80 °C, 1 h).

### ■ General procedure A (Table S1)

A mixture of **1a** (234.7 mg, 0.5 mmol), **2a** (49.6 mg, 0.75 mmol) and base (1.0 mmol) in solvent (5 mL) was heated at the indicated temperature (oil-bath) with stirring for 2–16 h. After cooling to room temperature, water was added to the mixture and the whole was extracted with AcOEt (3 x 20 mL), washed with brine (20 mL). The organic layer was dried over MgSO<sub>4</sub> and concentrated *in vacuo* to afford crude material which was dissolved in AcOEt (5 mL). To this solution was added *p*TsOH (0.05 mmol) and the mixture was heated at 80 °C with stirring for 1 h. After addition of water at room temperature, the whole was extracted with AcOEt (3 x 20 mL), washed with brine (20 mL). The organic layer was dried over MgSO<sub>4</sub> and concentrated *in vacuo*. The residue was purified by silica gel column chromatography (AcOEt:hexane = 1:5–1:1) to give **3aa**.

### ■ General procedure B (Table S1)

A mixture of **1a** (234.7 mg, 0.5 mmol) and **2a** (49.6 mg, 0.75 mmol) in ClC<sub>6</sub>H<sub>5</sub> (5 mL) was heated at 80 °C (oil-bath) with stirring. After 2 h, to this solution was added acid and the mixture was heated at 80 °C with stirring for 0.5–1 h. After addition of water at room temperature, the whole was extracted with AcOEt (3 x 20 mL), washed with brine (20 mL). The organic layer was dried over MgSO<sub>4</sub> and concentrated *in vacuo*. The residue was purified by silica gel column chromatography (AcOEt:hexane = 1:5–1:1) to give **3aa**.

### ■ General procedure C (Scheme 2)

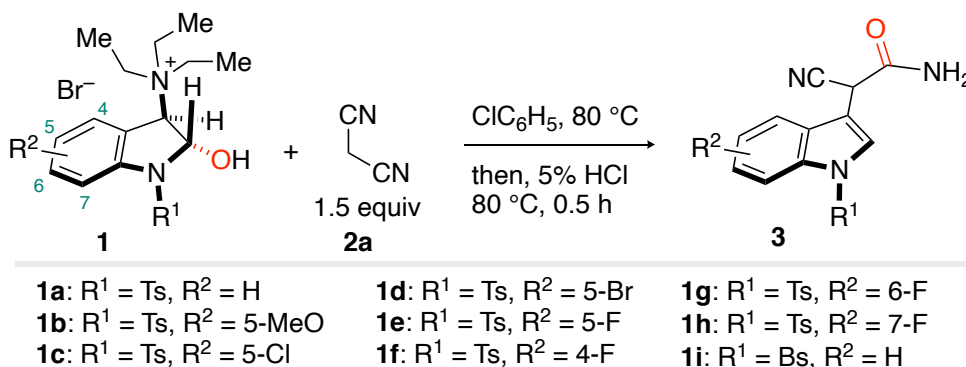

A mixture of **1** (1 mmol) and **2a** (99.1 mg, 1.5 mmol) in ClC<sub>6</sub>H<sub>5</sub> (10 mL) was heated at 80 °C (oil-bath) with stirring. After 2 h, to this solution was added 5% HCl (5 mL) and the mixture was heated at 80 °C with stirring for 0.5 h. After addition of water at room temperature, the whole was extracted with AcOEt (3 x 20 mL), washed with brine (20 mL). The organic layer was dried over MgSO<sub>4</sub> and concentrated *in vacuo*. The residue was purified by silica gel column chromatography (AcOEt:hexane = 1:5–1:1) to give **3aa-3ia**.

### 2-Cyano-2-(1-tosyl-1*H*-indol-3-yl)acetamide (**3aa**)

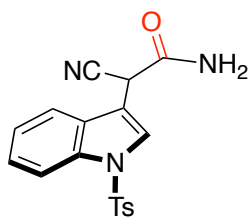

**3aa**

General procedure C: 349.9 mg, 99% yield. colorless solid; mp: 173.3-176.0 °C; <sup>1</sup>H NMR (600 MHz, DMSO-*d*<sub>6</sub>) δ: 7.89 (d, *J* = 7.8 Hz, 1H), 7.88 (d, *J* = 8.4 Hz, 2H), 7.82 (d, *J* = 2.4 Hz, 1H), 7.77 (br s, 1H), 7.64 (d, *J* = 7.8 Hz, 1H), 7.57 (br s, 1H), 7.35–7.38 (m, 2H), 7.36 (t, *J* = 6.3 Hz, 1H), 7.29 (t, *J* = 7.8 Hz, 1H), 5.39 (s, 1H), 2.28, 2.29 (2 s, 3H); <sup>13</sup>C NMR (151 MHz, DMSO-*d*<sub>6</sub>) δ: 165.4, 146.5, 134.7, 134.3, 130.9, 128.4, 127.5, 126.5, 126.0, 124.2, 120.6, 117.5, 113.8, 113.7, 36.4, 21.6; HRMS (ESI) *m/z*: 376.0723 (Calcd for C<sub>18</sub>H<sub>15</sub>N<sub>3</sub>NaO<sub>3</sub>S [M+Na]<sup>+</sup>: 376.0732).

### 2-Cyano-2-(5-methoxy-1-tosyl-1*H*-indol-3-yl)acetamide (3ba)

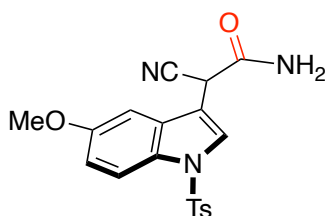

**3ba**

General procedure C: 254.6 mg, 66% yield. colorless solid; mp: 163.7-164.2 °C; <sup>1</sup>H NMR (600 MHz, DMSO-*d*<sub>6</sub>) δ: 7.83 (d, *J* = 8.4 Hz, 2H), 7.79 (br s, 1H), 7.79 (d, *J* = 9.0 Hz, 1H), 7.75 (s, 1H), 7.57 (br s, 1H), 7.36 (d, *J* = 8.4 Hz, 2H), 7.11 (d, *J* = 2.4 Hz, 1H), 6.98 (dd, *J* = 2.4, 9.0 Hz, 1H), 5.33 (s, 1H), 3.71 (s, 3H), 2.29 (s, 3H); <sup>13</sup>C NMR (151 MHz, DMSO-*d*<sub>6</sub>) δ: 165.4, 156.6, 146.3, 134.3, 130.9, 129.5, 129.3, 127.4, 127.2, 117.5, 114.8, 114.5, 113.9, 103.4, 56.1, 36.3, 21.6; HRMS (ESI) *m/z*: 406.0822 (Calcd for C<sub>19</sub>H<sub>17</sub>N<sub>3</sub>NaO<sub>4</sub>S [M+Na]<sup>+</sup>: 406.0837).

### 2-(5-Chloro-1-tosyl-1*H*-indol-3-yl)-2-cyanoacetamide (3ca)

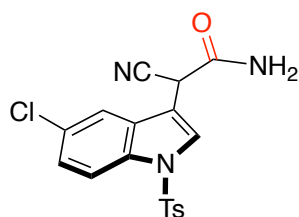

**3ca**

General procedure C: 309.0 mg, 80% yield. colorless solid; mp: 198.8-202.3 °C; <sup>1</sup>H NMR (600 MHz, DMSO-*d*<sub>6</sub>) δ: 7.93 (d, *J* = 8.4 Hz, 1H), 7.89–7.90 (m, 3H), 7.84 (br s, 1H), 7.67 (d, *J* = 1.8 Hz, 1H), 7.61 (br s, 1H), 7.41 (dd, *J* = 1.8, 9.0 Hz, 1H), 7.38 (d, *J* = 9.0 Hz, 2H), 5.38 (d, *J* = 1.2 Hz, 1H), 2.30 (s, 3H); <sup>13</sup>C NMR (151 MHz, DMSO-*d*<sub>6</sub>) δ: 165.3, 146.8, 134.1, 133.2, 131.0, 129.7, 128.9, 128.1, 127.6, 126.0, 120.0, 117.4, 115.6, 113.2, 36.2, 21.6; HRMS (ESI) *m/z*: 410.0334, 412.0311 (Calcd for C<sub>18</sub>H<sub>14</sub>ClN<sub>3</sub>NaO<sub>3</sub>S [M+Na]<sup>+</sup>: 410.0342, 412.0311).

### 2-(5-Bromo-1-tosyl-1H-indol-3-yl)-2-cyanoacetamide (3da)

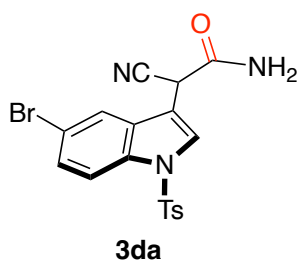

General procedure C: 317.4 mg, 73% yield. colorless solid; mp: 197.8-200.8 °C; <sup>1</sup>H NMR (600 MHz, DMSO-*d*<sub>6</sub>) δ: 7.82-7.90 (m, 6H), 7.62 (br s, 1H), 7.52 (d, *J* = 9.0 Hz, 1H), 7.37 (m, 2H), 5.39–5.40 (m, 1H), 2.28, 2.29 (2 s, 3H); <sup>13</sup>C NMR (151 MHz, DMSO-*d*<sub>6</sub>) δ: 165.3, 146.7, 134.0, 133.5, 131.0, 130.2, 128.6, 128.0, 127.5, 123.0, 117.4, 116.9, 115.9, 113.1, 36.2, 21.6; HRMS (ESI) *m/z*: 453.9840, 455.9819 (Calcd for C<sub>18</sub>H<sub>14</sub>BrN<sub>3</sub>NaO<sub>3</sub>S [M+Na]<sup>+</sup>: 453.9837, 455.9816).

### 2-Cyano-2-(5-fluoro-1-tosyl-1H-indol-3-yl)acetamide (3ea)

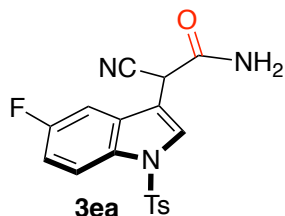

General procedure C: 344.7 mg, 93% yield. colorless solid; mp: 185.8-186.8 °C; <sup>1</sup>H NMR (600 MHz, CDCl<sub>3</sub>) δ: 7.94 (dd, *J* = 3.6, 8.4 Hz, 1H), 7.80 (s, 1H), 7.78 (d, *J* = 7.8 Hz, 2H), 7.29 (dd, *J* = 2.4, 9.0 Hz, 1H), 7.28 (d, *J* = 7.8 Hz, 2H), 7.12 (td, *J* = 2.4, 9.0 Hz, 1H), 5.97 (br s, 1H), 5.68 (br s, 1H), 4.78 (s, 1H), 2.37 (s, 3H); <sup>13</sup>C NMR (151 MHz, CDCl<sub>3</sub>) δ: 164.0, 159.9 (d, *J*<sub>C-F</sub> = 242.8 Hz), 146.1, 134.5, 131.6, 130.4, 128.6 (d, *J*<sub>C-F</sub> = 10.1 Hz), 127.2, 127.1, 115.5, 115.2 (d, *J*<sub>C-F</sub> = 8.7 Hz), 114.3 (d, *J*<sub>C-F</sub> = 24.6 Hz), 111.5 (d, *J*<sub>C-F</sub> = 4.4 Hz), 105.6 (d, *J*<sub>C-F</sub> = 24.6 Hz), 36.5, 21.8; HRMS (ESI) *m/z*: 394.0638 (Calcd for C<sub>18</sub>H<sub>14</sub>FN<sub>3</sub>NaO<sub>3</sub>S [M+Na]<sup>+</sup>: 394.0638).

### 2-Cyano-2-(4-fluoro-1-tosyl-1H-indol-3-yl)acetamide (3fa)

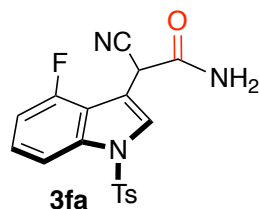

General procedure C: 305.7 mg, 82% yield. colorless solid; mp: 165.1-166.4 °C; <sup>1</sup>H NMR (600 MHz, DMSO-*d*<sub>6</sub>) δ: 7.93 (d, *J* = 8.4 Hz, 2H), 7.81 (s, 1H), 7.74 (d, *J* = 8.4 Hz, 1H), 7.66 (br s, 1H), 7.61 (br s, 1H), 7.40 (d, *J* = 7.8 Hz, 2H), 7.34-7.38 (m, 1H), 7.08 (dd, *J* = 7.8, 9.6 Hz, 1H), 5.47, 5.50 (2s, 1H), 2.31 (s, 3H) (containing rotamers); <sup>13</sup>C NMR (151 MHz, CDCl<sub>3</sub>) δ: 165.3, 165.1, 165.0, 155.8 (d, *J*<sub>C-F</sub> = 248.7 Hz), 151.8 (d, *J*<sub>C-F</sub> = 248.7 Hz), 147.0, 146.8, 136.8 (d, *J*<sub>C-F</sub> = 8.8 Hz), 135.9 (d, *J*<sub>C-F</sub> = 8.6 Hz), 134.1, 133.9, 131.1, 131.0, 130.0, 128.5, 127.7, 127.6, 127.2, 118.4 (d, *J*<sub>C-F</sub> = 20.2 Hz), 117.7, 117.6, 117.2 (d, *J*<sub>C-F</sub> = 21.6 Hz), 115.9, 115.2, 114.8, 111.6 (d, *J*<sub>C-F</sub> = 2.9 Hz), 111.5 (d, *J*<sub>C-F</sub> = 2.9 Hz), 36.5, 21.8; HRMS (ESI) *m/z*: 394.0638 (Calcd for C<sub>18</sub>H<sub>14</sub>FN<sub>3</sub>NaO<sub>3</sub>S [M+Na]<sup>+</sup>: 394.0638).

$F = 2.9$  Hz), 111.3, 110.2, 109.8 (d,  $J_{C-F} = 18.9$  Hz), 102.4 (d,  $J_{C-F} = 18.9$  Hz), 36.2, 36.1, 22.7, 21.6 (containing rotamers); HRMS (ESI)  $m/z$ : 394.0635 (Calcd for  $C_{18}H_{14}FN_3NaO_3S$   $[M+Na]^+$ : 394.0638).

### 2-Cyano-2-(6-fluoro-1-tosyl-1H-indol-3-yl)acetamide (3ga)

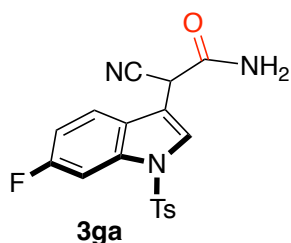

General procedure C: 318.3 mg, 86% yield. colorless solid; mp: 181.8-187.8 °C;  $^1H$  NMR (600 MHz,  $CDCl_3$ )  $\delta$ : 7.80 (d,  $J = 8.4$  Hz, 2H), 7.75 (s, 1H), 7.22 (dd,  $J = 3.0, 9.0$  Hz, 1H), 7.57 (dd,  $J = 5.4, 9.6$  Hz, 1H), 7.29 (d,  $J = 8.4$  Hz, 2H), 7.06 (td,  $J = 3.0, 9.0$  Hz, 1H), 5.90 (br s, 1H), 5.53 (br s, 1H), 4.80 (s, 1H), 2.38 (s, 3H);  $^{13}C$  NMR (151 MHz,  $CDCl_3$ )  $\delta$ : 164.2, 161.6 (d,  $J_{C-F} = 245.8$  Hz), 146.2, 135.5 (d,  $J_{C-F} = 19.6$  Hz), 134.5, 130.5, 127.1, 125.8, 123.9, 120.9 (d,  $J_{C-F} = 10.1$  Hz), 115.6, 112.8 (d,  $J_{C-F} = 24.6$  Hz), 111.7, 101.3 (d,  $J_{C-F} = 27.5$  Hz), 36.7, 21.8; HRMS (ESI)  $m/z$ : 394.0636 (Calcd for  $C_{18}H_{14}FN_3NaO_3S$   $[M+Na]^+$ : 394.0638).

### 2-Cyano-2-(7-fluoro-1-tosyl-1H-indol-3-yl)acetamide (3ha)

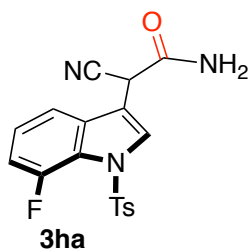

General procedure C: 333.5 mg, 90% yield. colorless solid; mp: 88.2-91.6 °C;  $^1H$  NMR (600 MHz,  $DMSO-d_6$ )  $\delta$ : 7.97 (s, 1H), 7.83 (d,  $J = 8.4$  Hz, 2H), 7.77 (br s, 1H), 7.61 (br s, 1H), 7.46 (dd,  $J = 1.2, 7.8$  Hz, 1H), 7.42 (d,  $J = 8.4$  Hz, 2H), 7.28 (td,  $J = 4.2, 7.8$  Hz, 1H), 7.16 (dd,  $J = 7.8, 12.6$  Hz, 1H), 5.49 (s, 1H), 2.33 (s, 3H);  $^{13}C$  NMR (151 MHz,  $DMSO-d_6$ )  $\delta$ : 165.4, 149.3 (d,  $J_{C-F} = 250.1$  Hz), 146.5, 134.8, 132.6, 130.9, 130.8 (d,  $J_{C-F} = 7.3$  Hz), 129.3, 127.9, 125.5 (d,  $J_{C-F} = 7.3$  Hz), 121.8 (d,  $J_{C-F} = 11.5$  Hz), 117.4, 116.7, 112.5 (d,  $J_{C-F} = 24.5$  Hz), 112.3, 36.3, 21.6; HRMS (ESI)  $m/z$ : 394.0642 (Calcd for  $C_{18}H_{14}FN_3NaO_3S$   $[M+Na]^+$ : 394.0638).

### 2-(1-Benzenesulfonyl-1H-indol-3-yl)-2-cyanoacetamide (3ia)

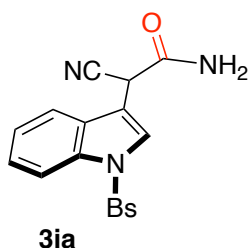

General procedure C: 277.9 mg, 82% yield. colorless solid; mp: 191.8-194.8 °C; <sup>1</sup>H NMR (600 MHz, DMSO-*d*<sub>6</sub>) δ: 8.00 (dd, *J* = 1.2, 9.0 Hz, 2H), 7.91 (d, *J* = 8.4 Hz, 1H), 7.84 (s, 1H), 7.77 (br s, 1H), 7.69 (t, *J* = 7.8 Hz, 1H), 7.64 (d, *J* = 7.8 Hz, 1H), 7.57-7.60 (m, 3H), 7.38 (td, *J* = 1.2, 7.8 Hz, 1H), 7.30 (td, *J* = 1.2, 7.5 Hz, 1H), 5.39 (s, 1H); <sup>13</sup>C NMR (151 MHz, DMSO-*d*<sub>6</sub>) δ: 165.4, 137.3, 135.5, 134.7, 130.6, 128.4, 127.5, 126.6, 126.1, 124.3, 120.7, 117.5, 114.0, 113.9, 36.3; HRMS (ESI) *m/z*: 362.0575 (Calcd for C<sub>17</sub>H<sub>13</sub>N<sub>3</sub>NaO<sub>3</sub>S [M+Na]<sup>+</sup>: 362.0580).

### General procedure D1 (Scheme 3)

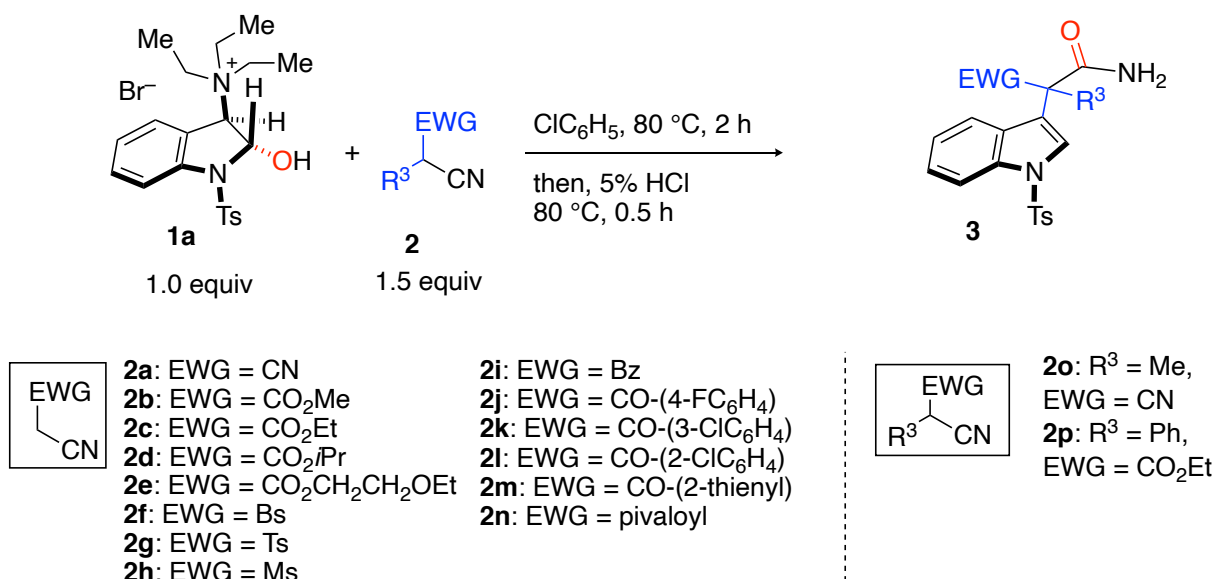

A mixture of **1a** (469.4 mg, 1 mmol) and **2** (1.5 mmol) in ClC<sub>6</sub>H<sub>5</sub> (10 mL) was heated at 80 °C (oil-bath) with stirring. After 2 h, to this solution was added 5% HCl (5 mL) and the mixture was heated at 80 °C with stirring for 0.5 h. After addition of water at room temperature, the whole was extracted with AcOEt (3 x 20 mL), washed with brine (20 mL). The organic layer was dried over MgSO<sub>4</sub> and concentrated *in vacuo*. The residue was purified by silica gel column chromatography (AcOEt:hexane = 1:5–1:1-3:1) to give **3ab**, **3ac**, **3ad**, **3ae**, **3af**, **3ag**, **3ah**, **3an**, **3ao**, and **3ap**.

### General procedure D2 (Scheme 3)

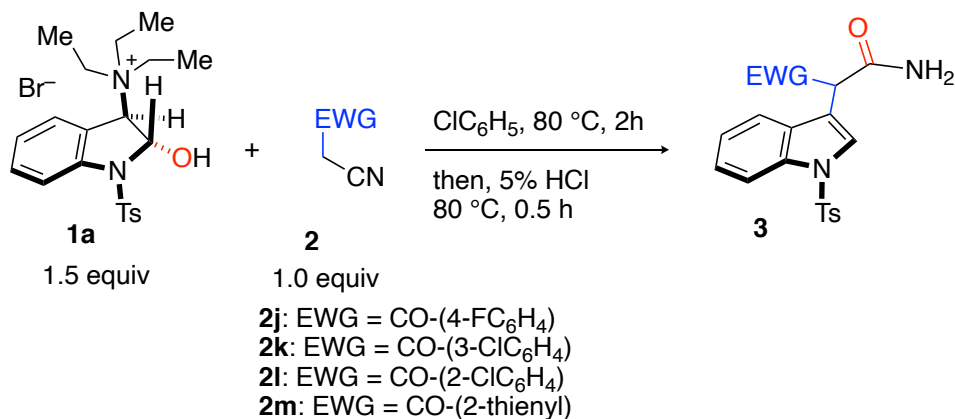

A mixture of **1a** (704.1 mg, 1.5 mmol) and **2** (1.0 mmol) in ClC<sub>6</sub>H<sub>5</sub> (10 mL) was heated at 80 °C (oil-bath) with

stirring. After 2 h, to this solution was added 5% HCl (5 mL) and the mixture was heated at 80 °C with stirring for 0.5 h. After addition of water at room temperature, the whole was extracted with AcOEt (3 x 20 mL), washed with brine (20 mL). The organic layer was dried over MgSO<sub>4</sub> and concentrated *in vacuo*. The residue was purified by silica gel column chromatography (AcOEt:hexane = 1:5–1:1-3:1 ) to give **3aj**, **3ak**, **3al**, and **3am**.

### Methyl 3-amino-3-oxo-2-(1-tosyl-1H-indol-3-yl)propanoate (**3ab**)

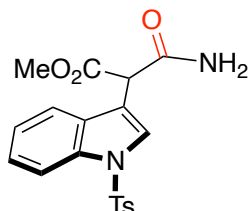

**3ab**

General procedure D1: 80.0 mg, 21% yield. colorless solid; mp: 138.7-141.7 °C; <sup>1</sup>H NMR (600 MHz, CDCl<sub>3</sub>) δ: 7.95 (d, *J* = 9.0 Hz, 1H), 7.77 (d, *J* = 8.4 Hz, 2H), 7.74 (s, 1H), 7.58 (d, *J* = 7.8 Hz, 1H), 7.33 (td, *J* = 1.2, 9.0 Hz, 1H), 7.26 (td, *J* = 0.6, 6.0 Hz, 1H), 7.23 (d, *J* = 8.4 Hz, 2H), 6.53 (br s, 1H), 6.17 (br s, 1H), 4.74 (s, 1H), 3.78 (s, 3H), 2.34 (s, 3H); <sup>13</sup>C NMR (151 MHz, CDCl<sub>3</sub>) δ: 169.8, 169.4, 145.5, 135.0, 130.2, 129.1, 127.1, 125.5, 125.2, 123.8, 119.9, 114.8, 113.8, 53.3, 50.1, 21.7; HRMS (ESI) *m/z*: 409.0829 (Calcd for C<sub>19</sub>H<sub>18</sub>N<sub>2</sub>NaO<sub>5</sub>S [M+Na]<sup>+</sup>: 409.0834).

### Ethyl 3-amino-3-oxo-2-(1-tosyl-1H-indol-3-yl)propanoate (**3ac**)

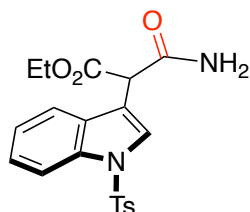

**3ac**

General procedure D1: 81.3 mg, 20% yield. colorless solid; mp: 138.7-141.7 °C; <sup>1</sup>H NMR (600 MHz, CDCl<sub>3</sub>) δ: 7.95 (d, *J* = 8.4 Hz, 1H), 7.76 (d, *J* = 8.4 Hz, 2H), 7.74 (s, 1H), 7.59 (d, *J* = 7.8 Hz, 1H), 7.33 (td, *J* = 1.2, 7.8 Hz, 1H), 7.25 (t, *J* = 7.2 Hz, 1H), 7.21 (d, *J* = 8.4 Hz, 2H), 6.55 (br s, 1H), 6.01 (br s, 1H), 4.71 (s, 1H), 4.19-4.27 (m, 2H), 2.33 (s, 3H), 1.25 (t, *J* = 7.2 Hz, 3H); <sup>13</sup>C NMR (151 MHz, CDCl<sub>3</sub>) δ: 169.4, 169.0, 145.4, 135.0, 130.1, 129.2, 127.0, 125.5, 125.0, 123.7, 120.0, 115.3, 113.7, 62.4, 50.4, 21.7, 14.1; HRMS (ESI) *m/z*: 423.0989 (Calcd for C<sub>20</sub>H<sub>20</sub>N<sub>2</sub>NaO<sub>5</sub>S [M+Na]<sup>+</sup>: 423.0991).

### Isopropyl 3-amino-3-oxo-2-(1-tosyl-1H-indol-3-yl)propanoate (**3ad**)

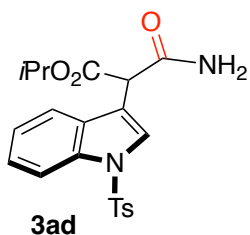

**3ad**



General procedure D1: 49.7 mg, 12% yield. colorless solid; mp: 152.2-156.2 °C; <sup>1</sup>H NMR (600 MHz, CDCl<sub>3</sub>) δ: 7.96 (d, *J* = 8.4 Hz, 1H), 7.75 (d, *J* = 8.4 Hz, 2H), 7.71 (s, 1H), 7.61 (d, *J* = 7.8 Hz, 1H), 7.33 (td, *J* = 1.2, 7.8 Hz, 1H), 7.25 (td, *J* = 1.2, 8.4 Hz, 1H), 7.21 (d, *J* = 8.4 Hz, 1H), 6.55 (br s, 1H), 5.62 (br s, 1H), 5.09 (sept, *J* = 6.0 Hz, 1H), 4.66 (s, 1H), 2.33 (s, 3H), 1.27 (d, *J* = 6.0 Hz, 3H), 1.19 (d, *J* = 6.0 Hz, 3H); <sup>13</sup>C NMR (151 MHz, CDCl<sub>3</sub>) δ: 169.1, 168.6, 145.4, 135.1, 130.1, 129.3, 127.0, 125.5, 123.7, 120.0, 115.7, 113.8, 70.2, 50.7, 21.7, 21.6; HRMS (ESI) *m/z*: 437.1136 (Calcd for C<sub>21</sub>H<sub>22</sub>N<sub>2</sub>NaO<sub>5</sub>S [M+Na]<sup>+</sup>: 437.1147).

### 2-Ethoxyethyl 3-amino-3-oxo-2-(1-tosyl-1*H*-indol-3-yl)propanoate (3ae)

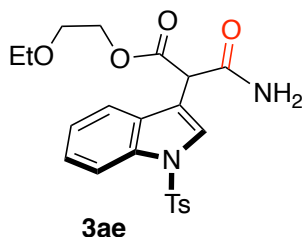

General procedure D1: 101.8 mg, 23% yield. colorless oil; <sup>1</sup>H NMR (600 MHz, CDCl<sub>3</sub>) δ: 7.95 (d, *J* = 8.4 Hz, 1H), 7.77 (d, *J* = 8.4 Hz, 2H), 7.76 (s, 1H), 7.60 (d, *J* = 8.4 Hz, 1H), 7.33 (t, *J* = 7.2 Hz, 1H), 7.26 (t, *J* = 8.4 Hz, 1H), 7.22 (d, *J* = 7.8 Hz, 2H), 6.52 (br s, 1H), 5.42 (br s, 1H), 4.77 (s, 1H), 4.35 (t, *J* = 3.6 Hz, 2H), 3.63 (q, *J* = 4.8 Hz, 2H), 3.47 (q, *J* = 6.6 Hz, 2H), 2.34 (s, 3H), 1.15 (t, *J* = 6.6 Hz, 3H); <sup>13</sup>C NMR (151 MHz, CDCl<sub>3</sub>) δ: 169.2, 168.6, 145.3, 135.1, 135.0, 130.1, 129.3, 127.0, 125.4, 125.2, 123.7, 120.0, 115.2, 113.7, 68.0, 66.7, 65.2, 50.5, 21.7, 15.1; HRMS (ESI) *m/z*: 467.1249 (Calcd for C<sub>22</sub>H<sub>24</sub>N<sub>2</sub>NaO<sub>6</sub>S [M+Na]<sup>+</sup>: 467.1253).

### 2-(Phenylsulfonyl)-2-(1-tosyl-1*H*-indol-3-yl)acetamide (3af)

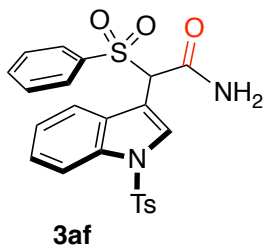

General procedure D1: 168.7 mg, 36% yield. colorless solid; mp: 238.6-239.9 °C; <sup>1</sup>H NMR (600 MHz, DMSO-*d*<sub>6</sub>) δ: 7.84 (d, *J* = 8.4 Hz, 1H), 7.79 (br s, 1H), 7.72 (d, *J* = 8.4 Hz, 2H), 7.63 (s, 1H), 7.61 (t, *J* = 8.1 Hz, 2H), 7.41-7.45 (m, 5H), 7.38 (t, *J* = 7.8 Hz, 2H), 7.30 (t, *J* = 7.2 Hz, 1H), 7.19 (t, *J* = 7.2 Hz, 1H), 5.77 (s, 1H), 2.32 (s, 3H); <sup>13</sup>C NMR (151 MHz, DMSO-*d*<sub>6</sub>) δ: 165.0, 146.5, 137.0, 134.8, 134.3, 133.8, 131.0, 129.8, 129.5, 129.3, 127.7, 127.2, 125.8, 124.0, 120.3, 113.6, 111.4, 66.2, 21.6; HRMS (ESI) *m/z*: 491.0687 (Calcd for C<sub>23</sub>H<sub>20</sub>N<sub>2</sub>NaO<sub>5</sub>S<sub>2</sub> [M+Na]<sup>+</sup>: 491.0711).

### 2-Tosyl-2-(1-tosyl-1*H*-indol-3-yl)acetamide (3ag)

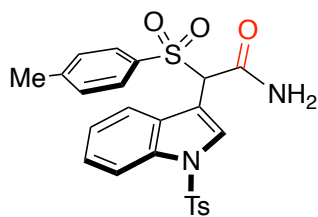

**3ag**

General procedure D1: 241.8 mg, 50% yield. colorless solid; mp: 230.0-234.5 °C; <sup>1</sup>H NMR (600 MHz, CDCl<sub>3</sub>) δ: 7.92 (d, *J* = 9.0 Hz, 1H), 7.75 (d, *J* = 9.0 Hz, 2H), 7.75 (s, 1H), 7.40 (d, *J* = 7.8 Hz, 2H), 7.31 (d, *J* = 7.2 Hz, 1H), 7.27 (td, *J* = 1.2, 7.8 Hz, 1H), 7.24 (d, *J* = 9.0 Hz, 2H), 7.14 (t, *J* = 8.4 Hz, 1H), 7.08 (d, *J* = 8.4 Hz, 1H), 6.84 (br s, 1H), 5.71 (br s, 1H), 5.21 (s, 1H), 2.35 (s, 3H), 2.30 (s, 3H); <sup>13</sup>C NMR (151 MHz, CDCl<sub>3</sub>) δ: 164.3, 145.9, 145.5, 135.0, 134.8, 134.3, 132.6, 130.1, 129.6, 129.5, 129.0, 127.8, 127.1, 125.2, 123.6, 119.4, 113.6, 110.1, 68.1, 21.7, 21.1; HRMS (ESI) *m/z*: 505.0864 (Calcd for C<sub>24</sub>H<sub>22</sub>N<sub>2</sub>NaO<sub>5</sub>S<sub>2</sub> [M+Na]<sup>+</sup>: 505.0868).

### 2-(Methylsulfonyl)-2-(1-tosyl-1H-indol-3-yl)acetamide (3ah)

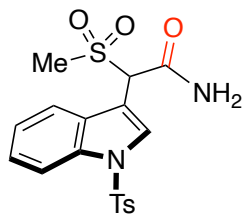

**3ah**

General procedure D1: 48.8 mg, 12% yield. colorless oil; <sup>1</sup>H NMR (600 MHz, CDCl<sub>3</sub>) δ: 8.10 (d, *J* = 8.4 Hz, 1H), 7.73 (d, *J* = 8.4 Hz, 2H), 7.53 (d, *J* = 8.4 Hz, 1H), 7.36 (td, *J* = 1.8, 7.5 Hz, 1H), 7.30 (s, 1H), 7.26 (t, *J* = 7.8 Hz, 1H), 7.18 (d, *J* = 8.4 Hz, 2H), 6.86 (br s, 1H), 6.54 (s, 1H), 6.05 (br s, 1H), 3.06 (s, 3H), 2.30 (s, 3H); <sup>13</sup>C NMR (151 MHz, CDCl<sub>3</sub>) δ: 163.9, 145.8, 137.3, 134.4, 130.1, 129.0, 127.7, 127.0, 126.3, 124.6, 122.0, 116.2, 115.4, 66.2, 40.5, 21.7; HRMS (ESI) *m/z*: 429.0557 (Calcd for C<sub>18</sub>H<sub>18</sub>N<sub>2</sub>NaO<sub>5</sub>S<sub>2</sub> [M+Na]<sup>+</sup>: 429.0555).

### 3-Oxo-3-phenyl-2-(1-tosyl-1H-indol-3-yl)propanamide (3ai)

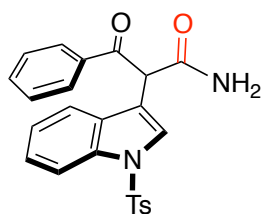

**3ai**

General procedure D1: 320.5 mg, 74% yield. colorless solid; mp: 223.3-227.4 °C; <sup>1</sup>H NMR (600 MHz, DMSO-*d*<sub>6</sub>) δ: 8.02 (d, *J* = 7.2 Hz, 2H), 7.85 (d, *J* = 8.4 Hz, 1H), 7.82 (s, 1H), 7.77 (d, *J* = 8.4 Hz, 2H), 7.70 (s, 1H), 7.61 (d, *J* = 7.2 Hz, 2H), 7.51 (d, *J* = 7.8 Hz, 2H), 7.27-7.33 (m, 4H), 7.20 (t, *J* = 7.8 Hz, 1H), 5.95 (s, 1H), 2.33, 2.27 (2s, 3H) (containing keto-enol tautomers); <sup>13</sup>C NMR (151 MHz, DMSO-*d*<sub>6</sub>) δ: 194.0, 169.3, 146.1, 136.3, 134.6, 134.5, 134.0, 130.8, 130.7, 130.5, 129.3, 129.0, 128.1, 128.0, 127.2, 127.1, 126.4, 125.3, 123.8, 123.7, 121.6, 117.4, 113.5, 52.6, 21.6 (containing keto-enol tautomers); HRMS (ESI) *m/z*: 455.1041 (Calcd for C<sub>24</sub>H<sub>20</sub>N<sub>2</sub>NaO<sub>4</sub>S [M+Na]<sup>+</sup>: 455.1041).

### 3-(4-Fluorophenyl)-3-oxo-2-(1-tosyl-1*H*-indol-3-yl)propenamide (3aj)

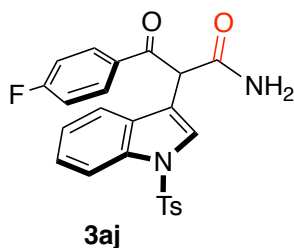

General procedure D2: 378.4 mg, 84% yield. colorless solid; mp: 200.8-203.8 °C; <sup>1</sup>H NMR (600 MHz, CDCl<sub>3</sub>) δ: 8.00-8.04 (m, 1.4H), 7.97 (d, *J* = 7.8 Hz, 0.4H), 7.68 (d, *J* = 8.4 Hz, 0.6H), 7.66 (d, *J* = 7.8 Hz, 0.8H), 7.63 (s, 0.4H), 7.55 (d, *J* = 8.4 Hz, 1.2H), 7.47 (d, *J* = 7.2 Hz, 0.6H), 7.38 (t, *J* = 8.4 Hz, 0.4H), 7.36 (t, *J* = 8.4 Hz, 0.6H), 7.29 (t, *J* = 8.4 Hz, 0.4H), 7.28 (t, *J* = 8.4 Hz, 0.6H), 7.22 (s, 0.6H), 7.18 (d, *J* = 8.4 Hz, 1.2H), 7.15 (d, *J* = 8.4 Hz, 0.8H), 7.06-7.11 (m, 2H), 6.52 (t, *J* = 7.8 Hz, 1H), 6.44 (br s, 0.4H), 5.70 (s, 0.4H), 5.52 (br s, 0.4H), 5.30 (br s, 0.6H), 5.29 (br s, 0.6H), 2.39 (s, 1.8H), 2.32 (s, 1.2H) (containing keto-enol tautomers); <sup>13</sup>C NMR (151 MHz, CDCl<sub>3</sub>) δ: 193.8, 174.6, 172.3, 169.0, 166.4 (d, *J*<sub>C-F</sub> = 257.3 Hz), 163.1 (d, *J*<sub>C-F</sub> = 250.2 Hz), 145.4, 145.3, 135.2, 135.1, 135.0, 134.9, 132.1 (d, *J*<sub>C-F</sub> = 2.9 Hz), 131.8 (d, *J*<sub>C-F</sub> = 10.1 Hz), 131.2 (d, *J*<sub>C-F</sub> = 2.9 Hz), 130.7, 130.2 (d, *J*<sub>C-F</sub> = 8.6 Hz), 130.1, 129.2, 126.9 (d, *J*<sub>C-F</sub> = 10.1 Hz), 126.8, 125.8, 125.7, 125.2, 124.2, 124.0, 120.2, 119.8, 116.7, 116.2, 116.2 (d, *J*<sub>C-F</sub> = 21.7 Hz), 114.8 (d, *J*<sub>C-F</sub> = 21.7 Hz), 114.1, 113.9, 93.0, 52.4, 21.7 (containing keto-enol tautomers); HRMS (ESI) *m/z*: 473.0935 (Calcd for C<sub>24</sub>H<sub>19</sub>FN<sub>2</sub>NaO<sub>4</sub>S [M+Na]<sup>+</sup>: 473.0947).

### 3-(3-Chlorophenyl)-3-oxo-2-(1-tosyl-1*H*-indol-3-yl)propenamide (3ak)

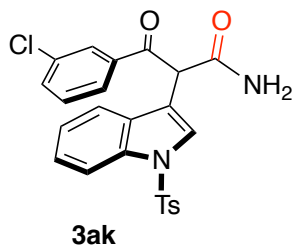

General procedure D2: 401.6 mg, 86% yield. colorless solid; mp: 192.8-194.8 °C; <sup>1</sup>H NMR (600 MHz, CDCl<sub>3</sub>) δ: 7.97 (d, *J* = 9.0 Hz, 1H), 7.67 (d, *J* = 8.4 Hz, 1H), 7.57 (d, *J* = 8.4 Hz, 2H), 7.44 (d, *J* = 7.2 Hz, 1H), 7.35 (t, *J* = 7.8 Hz, 1H), 7.25-7.27 (m, 2H), 7.18 (d, *J* = 8.4 Hz, 2H), 7.10 (dd, *J* = 2.4, 4.2 Hz, 1H), 6.88 (d, *J* = 8.4 Hz, 1H), 6.77 (t, *J* = 8.4 Hz, 1H), 5.55 (br s, 1H), 5.36 (br s, 1H), 2.37 (s, 3H) (containing keto-enol tautomers); <sup>13</sup>C NMR (151 MHz, CDCl<sub>3</sub>) δ: 194.2, 174.7, 171.6, 169.1, 145.4, 145.3, 137.3, 136.9, 135.4, 135.2, 135.1, 135.0, 134.8, 134.1, 133.9, 130.5, 130.3, 130.2, 130.1, 129.6, 129.1, 129.0, 128.9, 128.2, 127.1, 127.0, 126.9, 126.8, 126.2, 125.8, 125.7, 125.3, 124.1, 124.0, 93.7, 52.5, 21.8, 21.7 (containing keto-enol tautomers); HRMS (ESI) *m/z*: 489.0644, 491.0622 (Calcd for C<sub>24</sub>H<sub>19</sub>ClN<sub>2</sub>NaO<sub>4</sub>S [M+Na]<sup>+</sup>: 489.0652, 491.0622).

### 3-(2-Chlorophenyl)-3-oxo-2-(1-tosyl-1*H*-indol-3-yl)propenamide (3al)

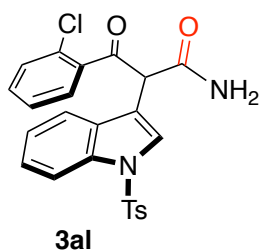

General procedure D2: 303.5 mg, 65% yield. colorless solid; mp: 209.2-211.7 °C; <sup>1</sup>H NMR (600 MHz, CDCl<sub>3</sub>) δ: 7.82 (d, *J* = 8.4 Hz, 1H), 7.50 (d, *J* = 7.8 Hz, 1H), 7.40 (d, *J* = 8.4 Hz, 2H), 7.33 (s, 1H), 7.27 (t, *J* = 8.4 Hz, 1H), 7.23 (td, *J* = 1.2, 6.6 Hz, 1H), 7.17 (d, *J* = 8.4 Hz, 1H), 7.12 (d, *J* = 7.8 Hz, 2H), 7.08 (td, *J* = 1.8, 7.8 Hz, 1H), 7.05 (d, *J* = 7.8 Hz, 1H), 6.91 (t, *J* = 7.8 Hz, 1H), 5.42 (br s, 1H), 5.32 (br s, 1H), 2.35 (s, 3H) (containing keto-enol tautomers); <sup>13</sup>C NMR (151 MHz, CDCl<sub>3</sub>) δ: 174.1, 172.0, 144.9, 135.0, 134.6, 132.2, 130.1, 130.0, 129.9, 129.5, 126.9, 126.7, 126.3, 125.3, 123.7, 120.4, 115.3, 113.6, 96.0, 21.7 (containing keto-enol tautomers); HRMS (ESI) *m/z*: 489.0641, 491.0620 (Calcd for C<sub>24</sub>H<sub>19</sub>ClN<sub>2</sub>NaO<sub>4</sub>S [M+Na]<sup>+</sup>: 489.0652, 491.0622).

### 3-Oxo-3-(thiophen-2-yl)-2-(1-tosyl-1H-indol-3-yl)propenamide (3am)

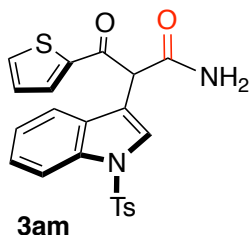

General procedure D2: 285.0 mg, 65% yield. colorless solid; mp: 219.8-222.8 °C; <sup>1</sup>H NMR (600 MHz, CDCl<sub>3</sub>) δ: 8.11 (d, *J* = 8.4 Hz, 1H), 7.84 (d, *J* = 8.4 Hz, 2H), 7.59 (s, 1H), 7.40 (t, *J* = 7.2 Hz, 1H), 7.38 (d, *J* = 7.8 Hz, 1H), 7.22-7.25 (m, 3H), 7.11 (dd, *J* = 1.2, 3.0 Hz, 1H), 6.97 (dd, *J* = 1.2, 4.8 Hz, 1H), 6.69 (dd, *J* = 3.6, 4.8 Hz, 1H), 5.20 (br s, 1H), 5.16 (br s, 1H), 2.40 (s, 3H) (containing keto-enol tautomers); <sup>13</sup>C NMR (151 MHz, CDCl<sub>3</sub>) δ: 174.8, 165.9, 145.4, 145.3, 136.7, 136.2, 135.7, 135.6, 134.2, 131.0, 130.5, 130.3, 130.1, 129.8, 128.8, 128.7, 128.0, 127.3, 127.0, 126.9, 126.7, 125.8, 125.0, 124.1, 123.9, 123.6, 120.2, 119.9, 119.8, 119.4, 115.9, 114.1, 114.0, 113.9, 90.3, 53.5, 21.8, 21.7 (containing keto-enol tautomers); HRMS (ESI) *m/z*: 461.0606 (Calcd for C<sub>22</sub>H<sub>18</sub>N<sub>2</sub>NaO<sub>4</sub>S<sub>2</sub> [M+Na]<sup>+</sup>: 461.0606).

### 4,4-Dimethyl-3-oxo-2-(1-tosyl-1H-indol-3-yl)pentanamide (3an)

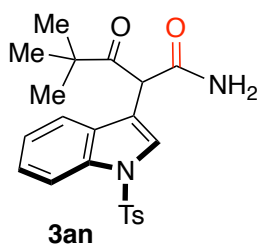

General procedure D1: 115.5 mg, 28% yield. colorless solid; mp: 158.7-161.7 °C; <sup>1</sup>H NMR (600 MHz, CDCl<sub>3</sub>) δ:

7.97 (d,  $J = 8.4$  Hz, 1H), 7.72 (d,  $J = 8.4$  Hz, 2H), 7.66 (d,  $J = 8.4$  Hz, 1H), 7.52 (s, 1H), 7.34 (t,  $J = 7.8$  Hz, 1H), 7.26 (t,  $J = 7.2$  Hz, 1H), 7.20 (d,  $J = 7.8$  Hz, 2H), 6.33 (br s, 1H), 5.75 (br s, 1H), 5.26 (s, 1H), 2.32 (s, 3H), 1.15 (s, 9H);  $^{13}\text{C}$  NMR (151 MHz,  $\text{CDCl}_3$ )  $\delta$ : 211.1, 169.5, 145.4, 135.3, 135.0, 130.1, 129.2, 126.9, 125.7, 124.6, 123.9, 119.9, 116.9, 113.9, 51.1, 46.0, 25.9, 21.7; HRMS (ESI)  $m/z$ : 435.1349 (Calcd for  $\text{C}_{22}\text{H}_{24}\text{N}_2\text{NaO}_4\text{S}$   $[\text{M}+\text{Na}]^+$ : 435.1354).

### 2-Cyano-2-phenyl-2-(1-tosyl-1H-indol-3-yl)acetamide (3ao)

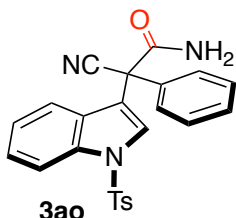

General procedure D1: 347.9 mg, 81% yield. colorless solid; mp: 62.0-68.9 °C;  $^1\text{H}$  NMR (600 MHz,  $\text{CDCl}_3$ )  $\delta$ : 7.96 (d,  $J = 7.8$  Hz, 1H), 7.76 (d,  $J = 8.4$  Hz, 2H), 7.55 (s, 1H), 7.45-7.48 (m, 2H), 7.36-7.41 (m, 3H), 7.31-7.33 (m, 2H), 7.25 (d,  $J = 7.8$  Hz, 2H), 7.17 (t,  $J = 6.6$  Hz, 1H), 6.45 (br s, 1H), 6.25 (br s, 1H), 2.35 (s, 3H);  $^{13}\text{C}$  NMR (151 MHz,  $\text{CDCl}_3$ )  $\delta$ : 167.1, 145.7, 135.5, 134.8, 133.9, 130.3, 129.6, 129.5, 127.6, 127.4, 127.1, 126.8, 125.7, 123.9, 120.7, 118.7, 117.3, 113.9, 53.2, 21.7; HRMS (ESI)  $m/z$ : 452.1042 (Calcd for  $\text{C}_{24}\text{H}_{19}\text{N}_3\text{NaO}_3\text{S}$   $[\text{M}+\text{Na}]^+$ : 452.1045).

### Ethyl 3-amino-3-oxo-2-phenyl-2-(1-tosyl-1H-indol-3-yl)propanoate (3ap)

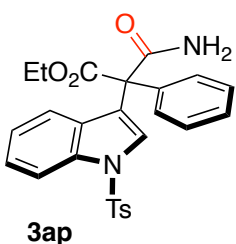

General procedure D1: 243.1 mg, 51% yield. colorless solid; mp: 129.7-137.7 °C;  $^1\text{H}$  NMR (600 MHz,  $\text{CDCl}_3$ )  $\delta$ : 7.92 (d,  $J = 8.4$  Hz, 1H), 7.72 (d,  $J = 7.8$  Hz, 2H), 7.48 (s, 1H), 7.31-7.36 (m, 5H), 7.22 (d,  $J = 8.4$  Hz, 2H), 7.21-7.24 (m, 1H), 7.07 (t,  $J = 8.4$  Hz, 1H), 7.04 (t,  $J = 8.4$  Hz, 1H), 6.91 (br s, 1H), 5.82 (br s, 1H), 4.19-4.24 (m, 2H), 2.34 (s, 3H), 1.08 (t,  $J = 6.6$  Hz, 3H);  $^{13}\text{C}$  NMR (151 MHz,  $\text{CDCl}_3$ )  $\delta$ : 171.3, 170.5, 145.1, 137.2, 135.4, 135.2, 130.0, 129.8, 128.7, 128.5, 128.4, 127.2, 127.0, 124.7, 123.2, 121.7, 121.6, 113.7, 63.9, 62.6, 21.7, 13.8; HRMS (ESI)  $m/z$ : 499.1304 (Calcd for  $\text{C}_{26}\text{H}_{24}\text{N}_2\text{NaO}_5\text{S}$   $[\text{M}+\text{Na}]^+$ : 499.1304).

### Procedure for Gram-Scale Synthesis of 3aa (Scheme 4)

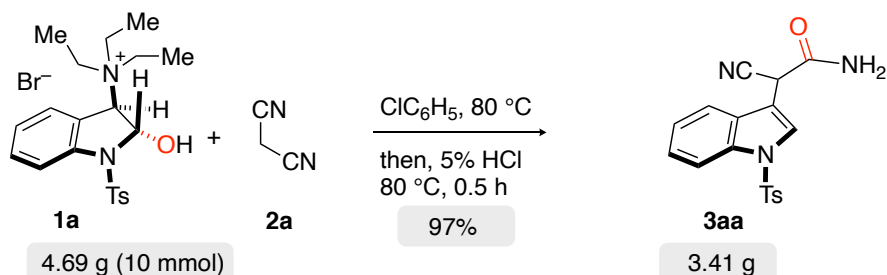

A mixture of **1a** (4.69 g, 10 mmol) and **2a** (991 g, 15 mmol) in  $\text{ClC}_6\text{H}_5$  (100 mL) was heated at 80 °C with stirring for 2 h. After 2 h, 5% aq. HCl (30 mL) was added to the mixture. Then the mixture was heated at 80 °C for 0.5 h. After cooling to room temperature, the whole was extracted with AcOEt (3 x 200 mL), washed with brine (2 x 100 mL). The organic layer was dried over  $\text{MgSO}_4$  and concentrated *in vacuo*. The residue was purified by silica gel column chromatography (AcOEt:hexane = 1:5–1:1) to give **3aa** (3.41 g, 97%).

### ■ Synthesis of **5** (Scheme 5)

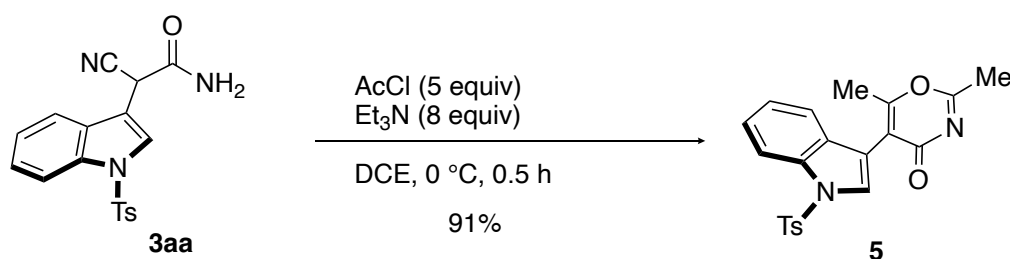

To a solution of **3aa** (70.7 mg, 0.2 mmol) and  $\text{Et}_3\text{N}$  (0.22 mL, 1.6 mmol) in DCE (2 mL) was added  $\text{AcCl}$  (0.071 mL, 1.0 mmol) at 0 °C under argon atmosphere. The mixture was stirred at 0 °C for 0.5 h. Then, water (5 mL) was added to the mixture and warmed to room temperature. The whole was extracted with AcOEt (2 x 20 mL), washed with brine (2 x 15 mL). The organic layer was dried over  $\text{MgSO}_4$  and concentrated *in vacuo*. The residue was purified by silica gel column chromatography (AcOEt:hexane = 1:5-1:2) to give **5** (72.0 mg, 91%).

### 2,6-Dimethyl-5-(1-tosyl-1H-indol-3-yl)-4H-1,3-oxazin-4-one (**5**)

**5**: 72.0 mg, 91% yield. yellow solid; mp: 246.0-248.0 °C;  $^1\text{H NMR}$  (600 MHz,  $\text{CDCl}_3$ )  $\delta$ : 7.97 (d,  $J = 8.4$  Hz, 1H), 7.76 (d,  $J = 7.8$  Hz, 2H), 7.73 (d,  $J = 8.4$  Hz, 1H), 7.68 (s, 1H), 7.35 (t,  $J = 8.4$  Hz, 1H), 7.28 (t,  $J = 6.6$  Hz, 1H), 7.24 (d,  $J = 8.4$  Hz, 2H), 2.48 (s, 3H), 2.36 (s, 3H), 2.04 (s, 3H);  $^{13}\text{C NMR}$  (151 MHz,  $\text{CDCl}_3$ )  $\delta$ : 166.9, 162.3, 145.7, 134.9, 134.5, 130.2, 128.0, 127.0, 125.7, 125.5, 123.9, 120.6, 116.9, 113.6, 111.8, 97.7, 21.7, 21.0, 20.4; HRMS (ESI)  $m/z$ : 417.0869 (Calcd for  $\text{C}_{21}\text{H}_{18}\text{N}_2\text{NaO}_4\text{S}$  [ $\text{M}+\text{Na}$ ] $^+$ : 417.0885).

### ■ Synthesis of **6** (Scheme 5)

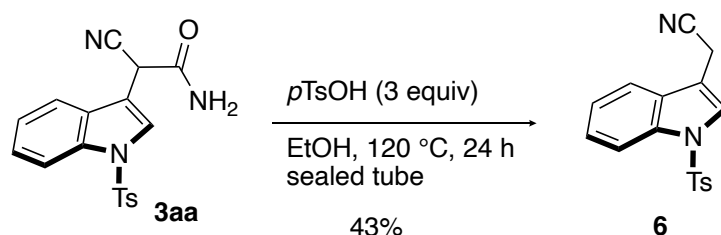

To a solution of **3aa** (35.3 mg, 0.1 mmol) in EtOH (2 mL) was added *p*-TsOH (57.1 mg, 0.3 mmol). The mixture was stirred under reflux conditions (120 °C, oil bath) for 24 h. After cooling to room temperature, water (5 mL) was added to the mixture and the whole was extracted with AcOEt (2 x 20 mL), washed with brine (2 x 15 mL). The organic layer was dried over  $\text{MgSO}_4$  and concentrated *in vacuo*. The residue was purified by silica gel column chromatography (AcOEt:hexane = 1:1) to give **6** (13.4 mg, 43%).

### 2-(1-Tosyl-1H-indol-3-yl)acetonitrile (**6**)<sup>S3</sup>

**6**: 13.4 mg, 43% yield. colorless solid; mp: 152.7-157.7 °C;  $^1\text{H NMR}$  (600 MHz,  $\text{CDCl}_3$ )  $\delta$ : 7.98 (d,  $J = 9.0$  Hz, 1H),

7.77 (d,  $J = 8.4$  Hz, 2H), 7.61 (s, 1H), 7.48 (d,  $J = 8.4$  Hz, 1H), 7.37 (t,  $J = 7.8$  Hz, 1H), 7.29 (t,  $J = 7.2$  Hz, 1H), 7.24 (d,  $J = 7.8$  Hz, 2H), 3.74 (s, 2H), 2.34 (s, 3H);  $^{13}\text{C}$  NMR (151 MHz,  $\text{CDCl}_3$ )  $\delta$ : 145.5, 135.2, 135.0, 130.1, 128.8, 127.0, 125.7, 124.5, 123.7, 118.9, 116.8, 114.0, 111.4, 21.7, 14.6.

### Synthesis of 7 (Scheme 5)

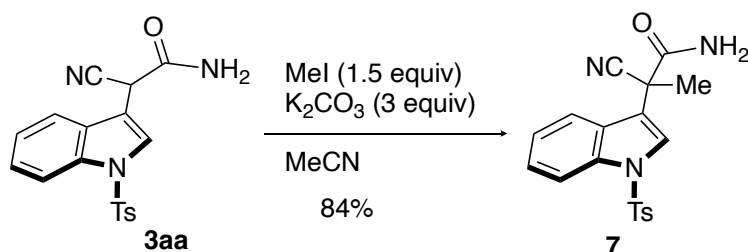

To a solution of **3aa** (35.3 mg, 0.1 mmol) and  $\text{K}_2\text{CO}_3$  (41.5 mg, 0.3 mmol) in MeCN (1 mL) was added MeI (21.3 mg, 0.15 mmol). The mixture was stirred at room temperature for 2 h. Then, water (5 mL) was added to the mixture and the whole was extracted with AcOEt (2 x 20 mL), washed with brine (2 x 15 mL). The organic layer was dried over  $\text{MgSO}_4$  and concentrated *in vacuo*. The residue was purified by silica gel column chromatography (AcOEt:hexane = 1:3-1:1) to give **7** (30.9 mg, 84%).

### 2-Cyano-2-(1-tosyl-1H-indol-3-yl)propanamide (7)

**7**: 30.9 mg, 84% yield. colorless oil;  $^1\text{H}$  NMR (600 MHz,  $\text{CDCl}_3$ )  $\delta$ : 7.98 (d,  $J = 8.4$  Hz, 1H), 7.81 (d,  $J = 8.4$  Hz, 2H), 7.74 (s, 1H), 7.67 (d,  $J = 7.8$  Hz, 1H), 7.37 (t,  $J = 8.4$  Hz, 1H), 7.28 (t,  $J = 6.6$  Hz, 1H), 7.27 (d,  $J = 8.4$  Hz, 2H), 5.94 (br s, 1H), 5.73 (br s, 1H), 2.36 (s, 3H), 2.03 (s, 3H);  $^{13}\text{C}$  NMR (151 MHz,  $\text{CDCl}_3$ )  $\delta$ : 168.1, 145.8, 135.5, 134.8, 130.3, 127.1, 126.9, 125.9, 124.4, 124.0, 120.3, 119.7, 117.7, 113.9, 42.7, 23.4, 21.8; HRMS (ESI)  $m/z$ : 390.0888 (Calcd for  $\text{C}_{19}\text{H}_{17}\text{N}_3\text{NaO}_3\text{S}$   $[\text{M}+\text{Na}]^+$ : 390.0888).

### Synthesis of $^{18}\text{O}$ -3aa

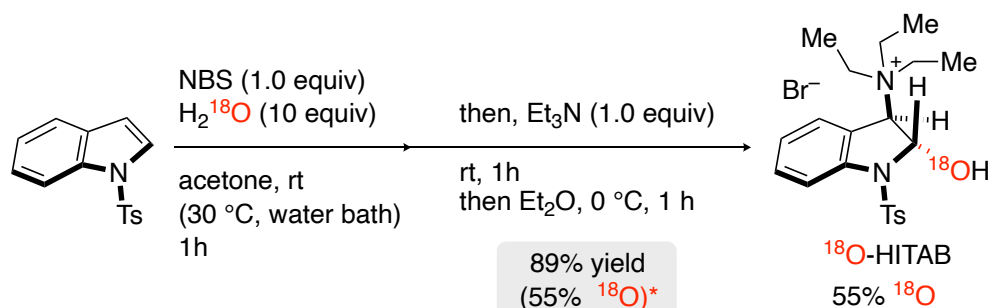

To a solution of 1-tosylindole (1.343 g, 4.95 mmol) and  $\text{H}_2^{18}\text{O}$  (1.0 g, 49.5 mmol) in acetone (15 mL) was added NBS (925 mg, 5.198 mmol) under argon atmosphere. The mixture was stirred at 30  $^\circ\text{C}$  until the complete disappearance of starting material as indicated by TLC (1 h).  $\text{Et}_3\text{N}$  (0.726 mL, 5.198 mmol) was added to the mixture and stirred under argon atmosphere. After 1 h,  $\text{Et}_2\text{O}$  (10 mL) was added to the mixture at 0  $^\circ\text{C}$  and stirred further 1 h. The resulting precipitate was separated by filtration, washed with acetone/ $\text{Et}_2\text{O}$  (1/1), and dried *in vacuo* to give  $^{18}\text{O}$ -**1a** (2.07 g, 89% yield).

$^{18}\text{O}$ -**1a**: 2.07 g, 89% yield. colorless solid; mp: 130.6-131.6  $^\circ\text{C}$ ;  $^1\text{H}$  NMR (600 MHz,  $\text{DMSO}-d_6$ )  $\delta$ : 7.89 (d,  $J = 6.6$

Hz, 1H), 8.02 (d,  $J = 9.0$  Hz, 2H), 7.89 (d,  $J = 7.2$  Hz, 1H), 7.54 (t,  $J = 7.2$  Hz, 1H), 7.48 (t,  $J = 7.2$  Hz, 1H), 7.39 (d,  $J = 8.4$  Hz, 2H), 7.13 (t,  $J = 7.8$  Hz, 1H), 6.35 (d,  $J = 6.6$  Hz, 1H), 4.81 (s, 1H), 3.31–3.45 (m, 6H), 2.33 (s, 3H), 1.00 (t,  $J = 7.8$  Hz, 9H);  $^{13}\text{C}$  NMR (151 MHz,  $\text{DMSO-}d_6$ )  $\delta$ : 145.4, 142.8, 136.1, 133.0, 130.5, 130.4, 128.2, 124.0, 120.4, 113.8, 84.7 ( $^{16}\text{O}$ ,  $^{18}\text{O}$ ), 75.4, 53.3, 21.5, 8.8; HRMS (ESI)  $m/z$ : 389.1889 ( $^{16}\text{O}$ ), 391.1930 ( $^{18}\text{O}$ ) (Calcd for  $\text{C}_{21}\text{H}_{29}\text{N}_2\text{O}_3\text{S}$   $[\text{M}]^+$ : 389.1889,  $\text{C}_{21}\text{H}_{29}\text{N}_2\text{O}_2^{18}\text{OS}$   $[\text{M}]^+$ : 391.1941).

### **$^{18}\text{O}$ -Incorporation experiment (Scheme 6a)**

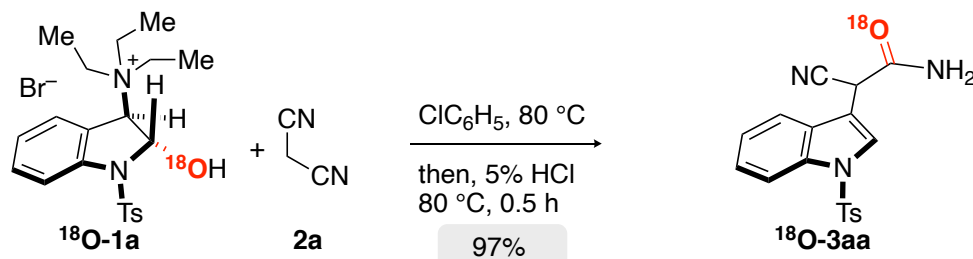

A mixture of  $^{18}\text{O}$ -**1a** (235 mg, 0.5 mmol) and **2a** (49.6 mg, 0.75 mmol) in  $\text{C}_6\text{H}_6$  (5 mL) was heated at 80 °C with stirring for 2 h. After 2 h, 5% aq. HCl (2 mL) was added to the mixture. Then the mixture was heated at 80 °C for 0.5 h. After cooling to room temperature, the whole was extracted with AcOEt (2 x 50 mL), washed with brine (2 x 15 mL). The organic layer was dried over  $\text{MgSO}_4$  and concentrated *in vacuo*. The residue was purified by silica gel column chromatography (AcOEt:hexane = 1:5–1:1) to give  $^{18}\text{O}$ -**3aa** (172.4 mg, 97%).

$^{18}\text{O}$ -**3aa**: 172.4 mg, 97% yield. colorless solid; mp: 170.0–173.2 °C;  $^1\text{H}$  NMR (600 MHz,  $\text{DMSO-}d_6$ )  $\delta$ : 7.89 (d,  $J = 6.6$  Hz, 1H), 7.88 (d,  $J = 9.0$  Hz, 2H), 7.81 (s, 1H), 7.77 (br s, 1H), 7.63 (d,  $J = 7.2$  Hz, 1H), 7.57 (br s, 1H), 7.37 (d,  $J = 8.4$  Hz, 2H), 7.35–7.38 (m, 1H), 7.29 (t,  $J = 8.4$  Hz, 1H), 5.38 (s, 1H), 2.29 (2 s, 3H);  $^{13}\text{C}$  NMR (151 MHz,  $\text{DMSO-}d_6$ )  $\delta$ : 165.29 ( $^{16}\text{O}$ ), 165.26 ( $^{18}\text{O}$ ), 146.3, 134.9, 134.6, 130.9, 128.5, 127.4, 126.4, 125.9, 124.1, 120.6, 117.4, 114.0, 113.9, 36.2, 21.5; HRMS (ESI)  $m/z$ : 376.0721 ( $^{16}\text{O}$ ), 378.0759 ( $^{18}\text{O}$ ) (Calcd for  $\text{C}_{18}\text{H}_{15}\text{N}_3\text{NaO}_3\text{S}$   $[\text{M}+\text{Na}]^+$ : 376.0732,  $\text{C}_{18}\text{H}_{15}\text{N}_3\text{NaO}_2^{18}\text{OS}$   $[\text{M}+\text{Na}]^+$ : 378.0774).

### **Isolation of the intermediate 8aa (Scheme 6b)**

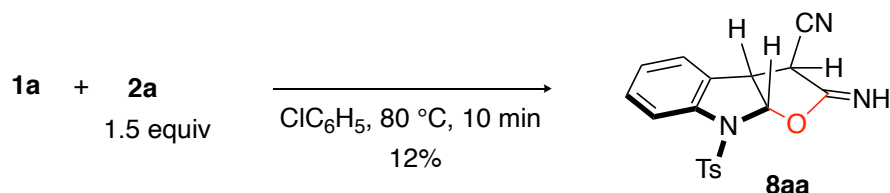

A mixture of **1a** (1.408 g, 3 mmol) and **2a** (297.3 mg, 4.5 mmol) in  $\text{C}_6\text{H}_6$  (30 mL) was heated at 80 °C (oil-bath) with stirring for 10 min. After cooling to room temperature, water was added to the mixture and the whole was extracted with AcOEt (3 x 50 mL), washed with brine (30 mL). The organic layer was dried over  $\text{MgSO}_4$  and concentrated *in vacuo*. The residue was purified by recrystallization ( $\text{CHCl}_3$ /hexane) to give **8aa** (125.1 mg, 12% yield).

***Rel*-(3*S*,3*aS*,8*aS*)-2-imino-8-tosyl-3,3*a*,8,8*a*-tetrahydro-2*H*-furo[2,3-*b*]indole-3-carbonitrile (**8aa**)**



125.1 mg, 12% yield. colorless solid; mp: 134.2-139.7 °C; <sup>1</sup>H NMR (600 MHz, CDCl<sub>3</sub>) δ: 7.75 (d, *J* = 8.4 Hz, 2H), 7.47 (d, *J* = 8.4 Hz, 1H), 7.30 (d, *J* = 7.2 Hz, 1H), 7.23–7.27 (m, 3H), 7.07 (t, *J* = 7.2 Hz, 1H), 6.63 (d, *J* = 7.8 Hz, 1H), 4.67 (br s, 1H), 4.66 (br s, 1H), 4.62 (d, *J* = 7.8 Hz, 1H), 2.38 (s, 3H); <sup>13</sup>C NMR (151 MHz, DMSO-*d*<sub>6</sub>) δ: 167.2, 145.4, 139.0, 134.8, 133.4, 130.6, 129.0, 128.1, 124.9, 124.8, 119.2, 113.9, 96.5, 52.2, 47.6, 21.5; HRMS (ESI) *m/z*: 376.0732 (Calcd for C<sub>18</sub>H<sub>15</sub>N<sub>3</sub>NaO<sub>3</sub>S [M+Na]<sup>+</sup>: 376.0732).

### ■ The reaction of **8aa** (Scheme 6b)

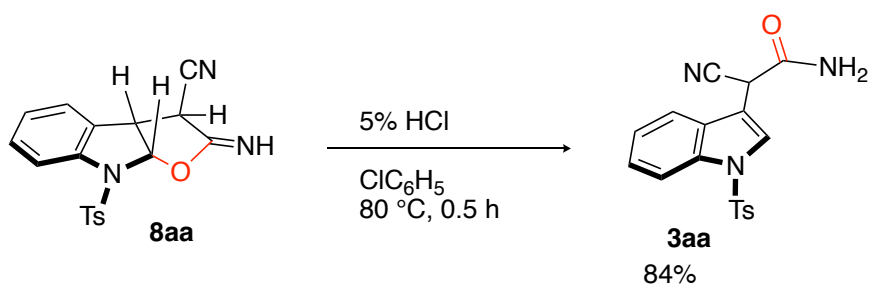

To a solution of **8aa** (106.0 mg, 0.3 mmol) in ClC<sub>6</sub>H<sub>5</sub> (3 mL) was added 5% HCl (3 mL) and the mixture was heated at 80 °C with stirring for 0.5 h. After addition of water at room temperature, the whole was extracted with AcOEt (3 x 15 mL), washed with brine (10 mL). The organic layer was dried over MgSO<sub>4</sub> and concentrated *in vacuo*. The residue was purified by silica gel column chromatography (AcOEt:hexane = 1:5–1:1–3:1) to give **3aa** (89.2 mg, 84% yield).

(S1) Abe, T.; Suzuki, T.; Anada, M.; Matsunaga, S.; Yamada, K.; *Org. Lett.*, **2017**, *19*, 4275–4278.

(S2) Hirao, S.; Yamashiro, T.; Abe, T. *Chem. Commun.* **2020**, *56*, 10183–10186.

(S3) Chen, X.; Qiu, G.; Liu, R.; Chen, D.; Chen, Z. *Org. Chem. Front.* **2020**, *7*, 890–895.

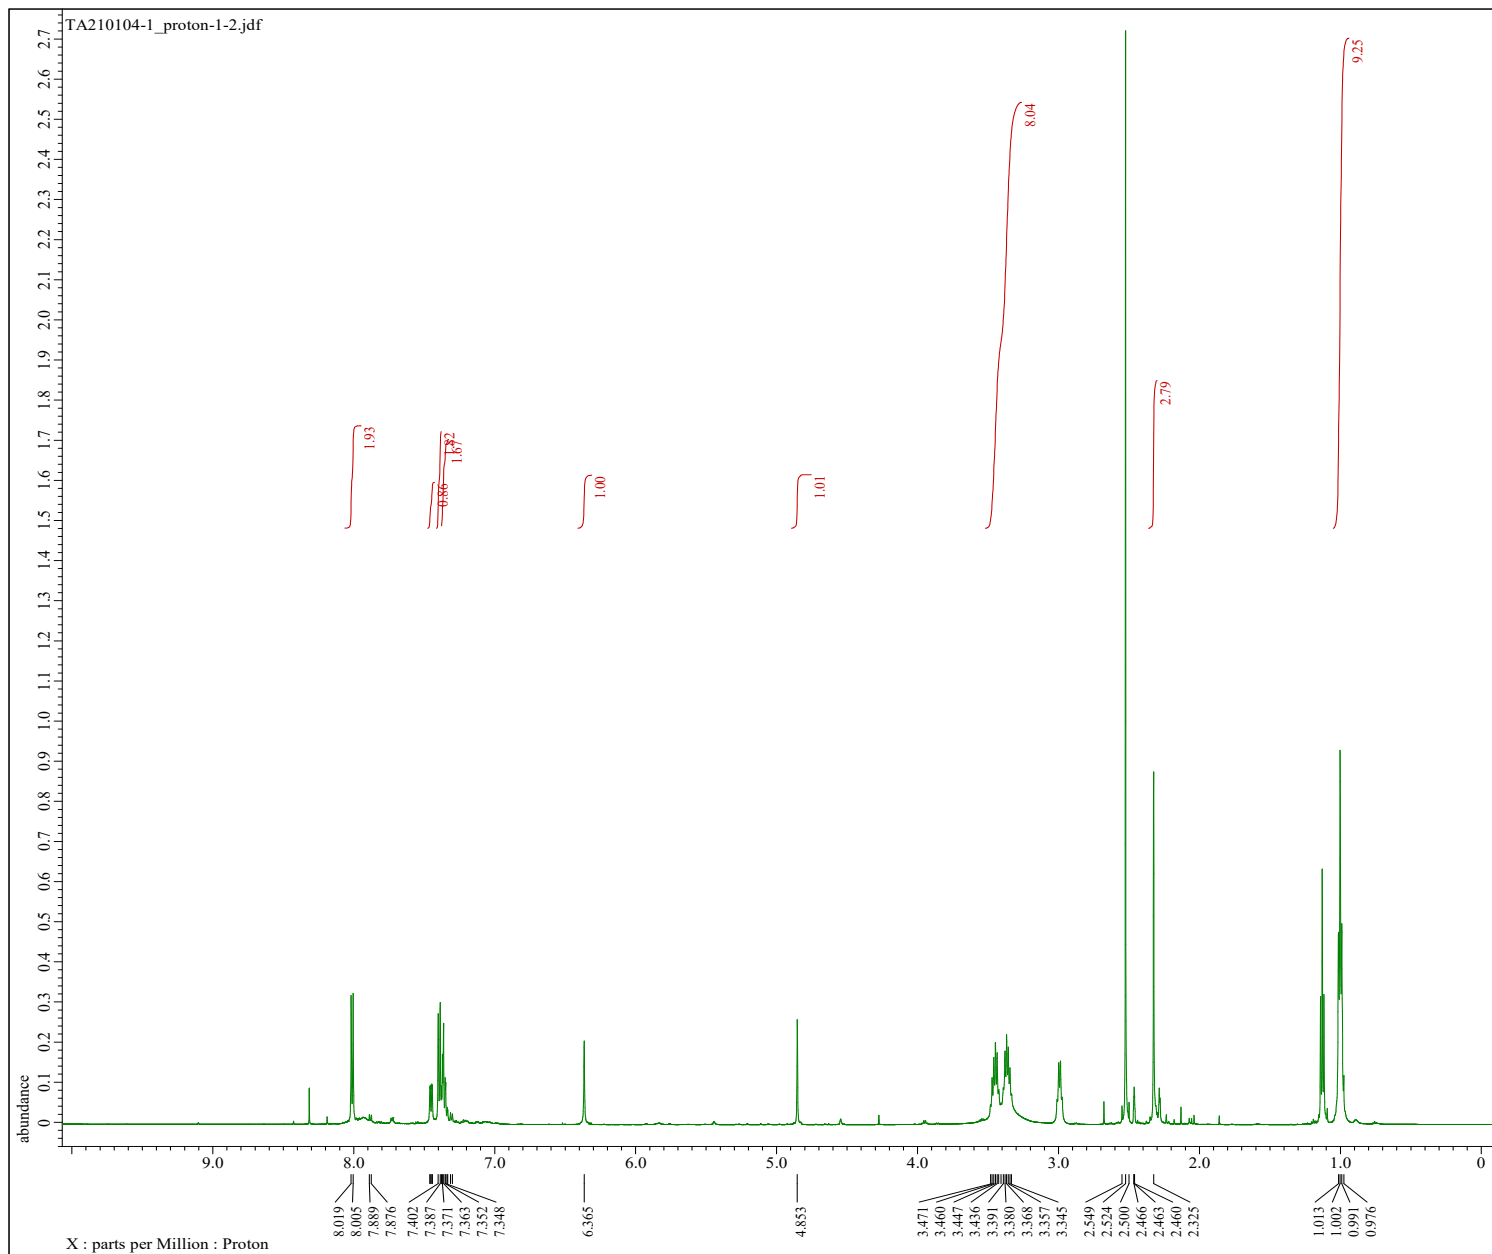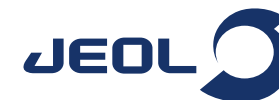

```

Filename      = TA210104-1_proton-1-2
Author        = delta
Experiment    = proton.jxp
Sample_Id     = TA210104-1
Solvent       = DMSO-D6
Actual_Start_Time = 4-JAN-2021 20:19:38
Revision_Time = 4-JAN-2021 20:22:33

Comment       = single_pulse-5F-HITAB
Data_Format   = 1D_COMPLEX
Dim_Size      = 13107
X_Domain      = Proton
Dim_Title     = Proton
Dim_Units     = [ppm]
Dimensions    = X
Spectrometer  = JNM-ECZ600R/S3

Field_Strength = 14.09636928[T] (600[M
X_Acq_Duration = 1.4548992[s]
X_Domain       = Proton
X_Freq         = 600.1723046[MHz]
X_Offset       = 5[ppm]
X Points       = 16384
X_Prescans     = 1
X_Resolution   = 0.68733284[Hz]
X_Sweep        = 11.26126126[kHz]
X_Sweep_Clipped = 9.00900901[kHz]
Irr_Domain     = Proton
Irr_Freq       = 600.1723046[MHz]
Irr_Offset     = 5[ppm]
Tri_Domain     = Proton
Tri_Freq       = 600.1723046[MHz]
Tri_Offset     = 5[ppm]
Blanking       = 5[us]
Clipped        = FALSE
Scans          = 16
Total_Scans    = 16

Relaxation_Delay = 5[s]
Recvr_Gain       = 26
Temp_Get         = 20.1[dc]
X_90_Width      = 9.5[us]
X_Acq_Time      = 1.4548992[s]
X_Angle         = 45[deg]
X_Atn           = 8.1[dB]
X_Pulse         = 4.75[us]
Irr_Mode        = Off
Tri_Mode        = Off
Dante_Loop      = 500
Dante_Presat    = FALSE
Decimation_Rate = 0
Experiment_Path = c:\Program Files\JEOL
Initial_Wait    = 1[s]
Phase           = (0, 90, 270, 180, 180
Presat_Time     = 5[s]
Presat_Time_Flag = FALSE
Relaxation_Delay_Calc = 0[s]
Relaxation_Delay_Temp = 5[s]
Repetition_Time = 6.4548992[s]

```

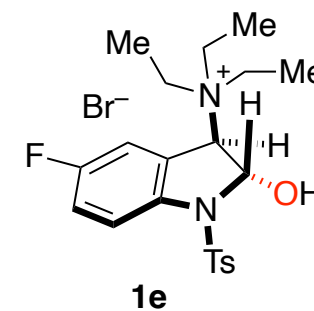

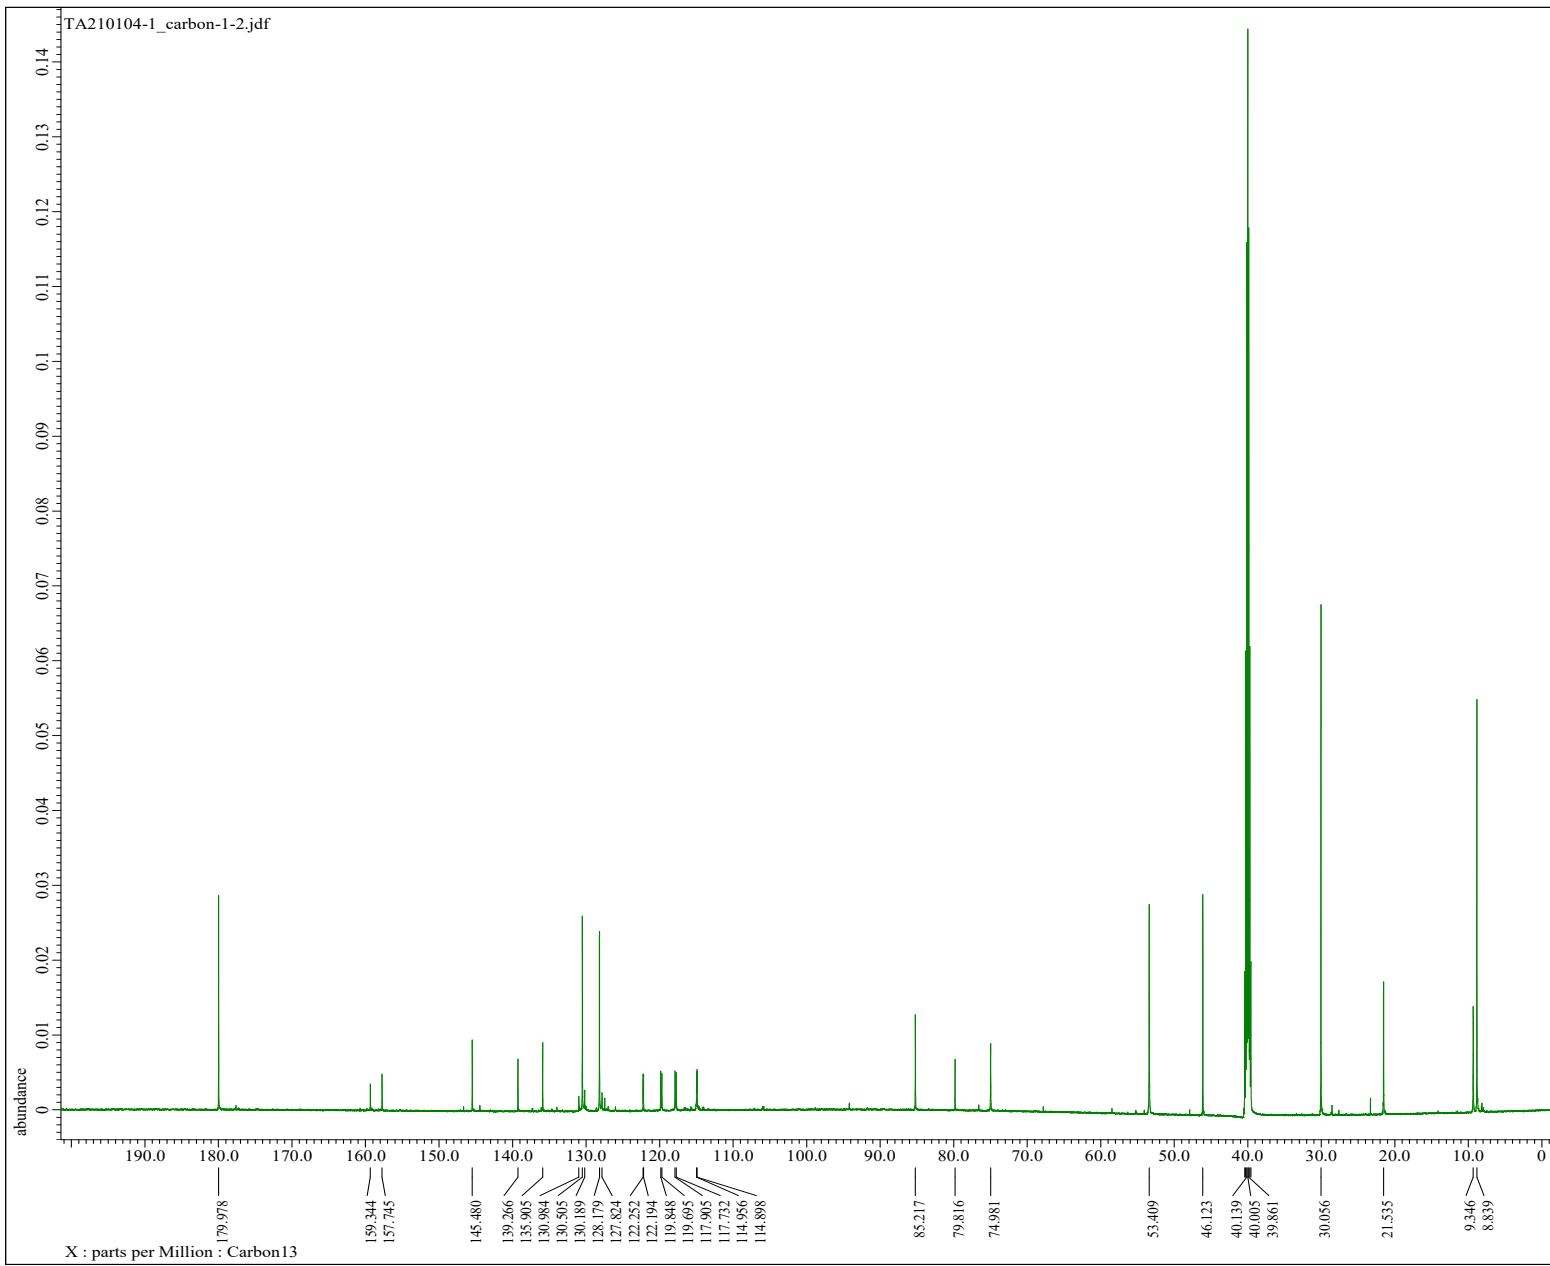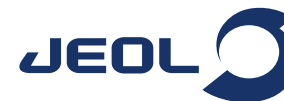

```

Filename      = TA210104-1_carbon-
Author       = delta
Experiment   = carbon.jxp
Sample_Id    = TA210104-1
Solvent      = DMSO-d6
Actual_Start Time = 4-JAN-2021 20:23:
Revision_Time = 5-JAN-2021 08:12:

Comment      = single pulse decou
Data_Format  = 1D COMPLEX
Dim_Size     = 26214
X_Domain     = Carbon13
Dim_Title    = Carbon13
Dim_Units    = [ppm]
Dimensions   = X
Spectrometer = JNM-ECZ600R/s3

Field_Strength = 14.09636928[T] (60
X_Acq_Duration = 0.69206016[s]
X_Domain       = Carbon13
X_Freq         = 150.91343039[MHz]
X_Offset       = 100[ppm]
X_Points       = 32768
X_Prescans     = 4
X_Resolution   = 1.44496109[Hz]
X_Sweep        = 47.34848485[kHz]
X_Sweep_Clipped = 37.87878788[kHz]
Irr_Domain     = Proton
Irr_Freq       = 600.1723046[MHz]
Irr_Offset     = 5[ppm]
Blanking       = 15[us]
Clipped        = TRUE
Scans          = 2048
Total_Scans    = 2048

Relaxation_Delay = 1[s]
Recvr_Gain       = 56
Temp_Get         = 20.8[dC]
X_90_Width      = 8.8[us]
X_Acq_Time      = 0.69206016[s]
X_Angle         = 30[deg]
X_Atn           = 11[dB]
X_Pulse         = 2.93333333[us]
Irr_Atn_Dec     = 26.162[dB]
Irr_Atn_Dec_Calc = 26.162[dB]
Irr_Atn_Dec_Default_Calc = 26.162[dB]
Irr_Atn_No     = 26.162[dB]
Irr_Dec_Bandwidth_Hz = 7.23684211[kHz]
Irr_Dec_Bandwidth_Fpm = 12.05794078[ppm]
Irr_Dec_Freq    = 600.1723046[MHz]
Irr_Dec_Merit_Factor = 2.2
Irr_Decoupling = TRUE
Irr_Noise       = TRUE
Irr_Noise       = WALTZ
Irr_Offset_Default = 5[ppm]
Irr_Pwidth      = 76[us]
Irr_Pwidth_Default = 76[us]
Irr_Pwidth_Default_Calc = 76[us]
Irr_Pwidth_Templ = 76[us]
Irr_Wurst       = FALSE
Decimation_Rate = 0
Experiment_Path = c:\Program Files\J
Initial_Wait     = 1[s]
Noe_Time         = 1[s]
Noe_Time_Flag    = FALSE
Relaxation_Delay_Calc = 0[s]
Relaxation_Delay_Temp = 1[s]
Repetition_Time = 1.69206016[s]
  
```

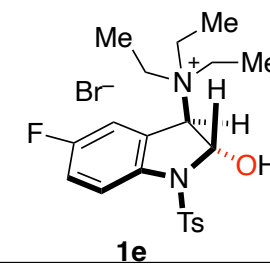

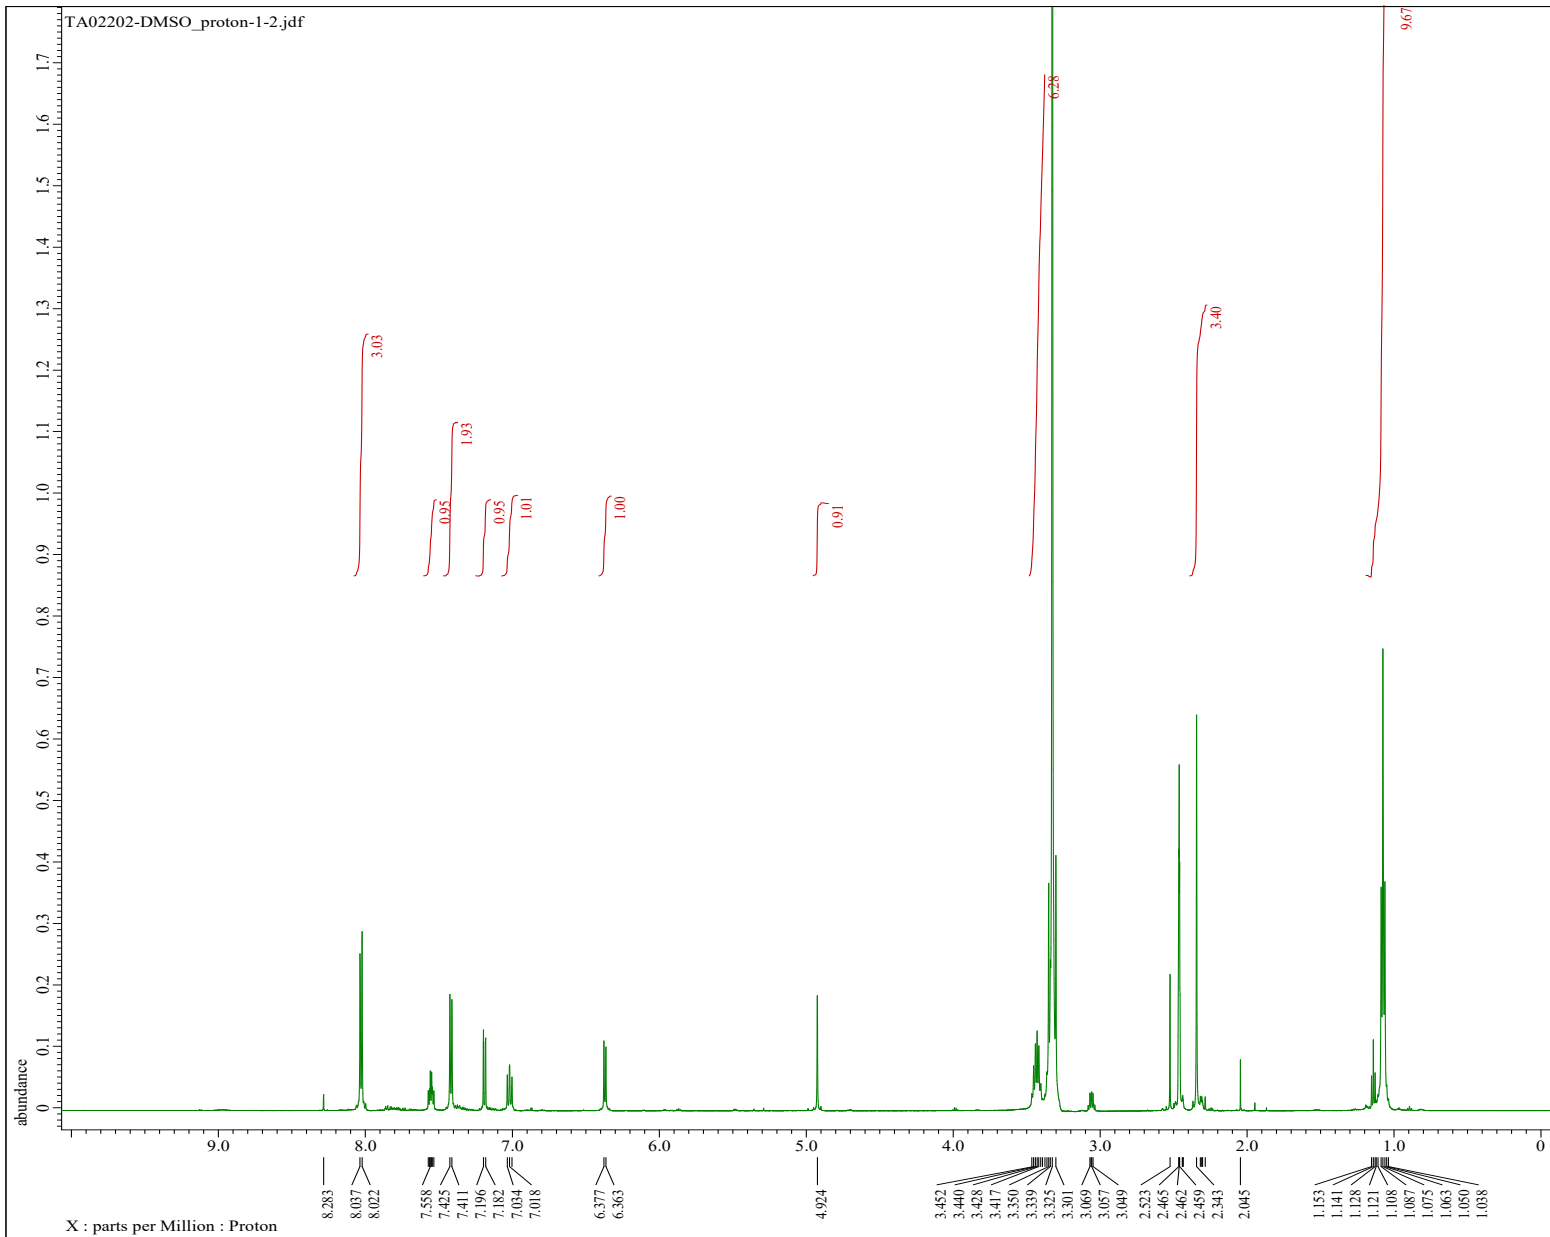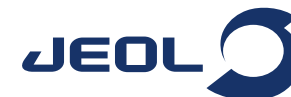

```

Filename      = TA02202-DMSO_proton-1
Author        = delta
Experiment    = proton.jxp
Sample_Id     = TA02202-DMSO
Solvent       = DMSO-D6
Actual_Start_Time = 21-DEC-2020 20:24:06
Revision_Time = 21-DEC-2020 20:30:19

Comment       = single pulse-6F-indol
Data_Format   = 1D_COMPLEX
Dim_Size      = 13107
X_Domain     = Proton
Dim_Title     = Proton
Dim_Units     = [ppm]
Dimensions    = X
Spectrometer  = JNM-ECZ600R/S3

Field_Strength = 14.09636928[T] (600[M]
X_Acq_Duration = 1.09051904[s]
X_Domain       = Proton
X_Freq         = 600.1723046[MHz]
X_Offset       = 5[ppm]
X_Points      = 16384
X_Prescans    = 1
X_Resolution  = 0.91699454[Hz]
X_Sweep       = 15.02403846[kHz]
X_Sweep_Clip  = 12.01923077[kHz]
Irr_Domain    = Proton
Irr_Freq      = 600.1723046[MHz]
Irr_Offset    = 5[ppm]
Tri_Domain    = Proton
Tri_Freq      = 600.1723046[MHz]
Tri_Offset    = 5[ppm]
Blanking      = FALSE
Clipped       = FALSE
Scans         = 16
Total_Scans   = 16

Relaxation_Delay = 5[s]
Recvr_Gain       = 36
Temp_Set        = 19.8[dc]
X_90_Width      = 9.5[us]
X_Acq_Time      = 1.09051904[s]
X_Angle         = 45[deg]
X_Attn          = 8.1[dB]
X_Pulse         = 4.75[us]
Irr_Mode        = Off
Tri_Mode        = Off
Dante_Loop      = 500
Dante_Preset    = FALSE
Decimation_Rate = 0
Experiment_Path = c:\Program Files\JEOL
Initial_Wait    = 1[s]
Phase          = (0, 90, 270, 180, 180)
Preset_Time     = 5[s]
Preset_Time_Flag = FALSE
Relaxation_Delay_Calc = 0[s]
Relaxation_Delay_Temp = 5[s]
Repetition_Time = 6.09051904[s]
  
```

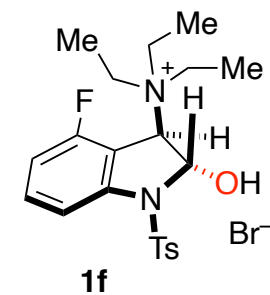

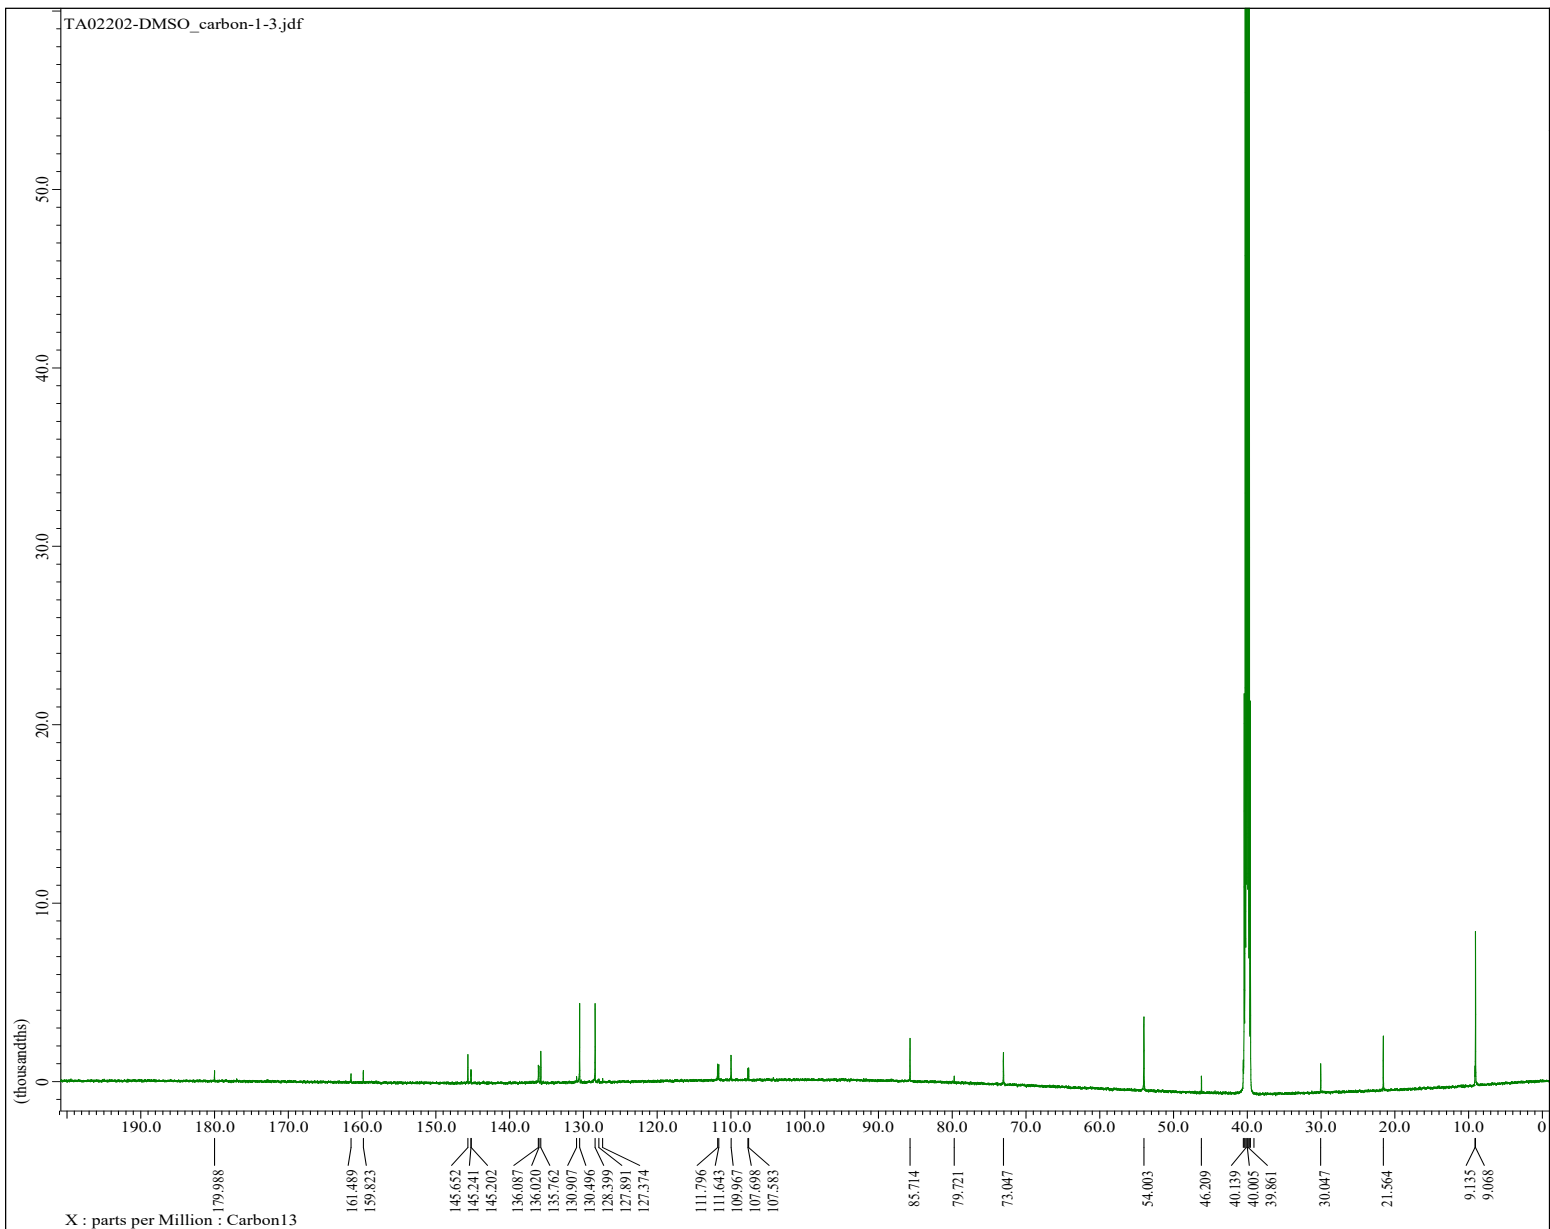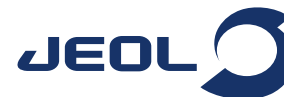

```

Filename           = TA02202-DMSO_carbo
Author             = delta
Experiment         = carbon_jmp
Sample_Id          = TA02202-DMSO
Solvent            = DMSO-D6
Actual_Start_Time  = 21-DEC-2020 22:17:
Revision_Time      = 22-DEC-2020 08:31:

Comment           = single pulse decou
Data_Format       = 1D COMPLEX
Dim_Size          = 26214
X_Domain          = Carbon13
Dim_Title         = Carbon13
Dim_Units         = [ppm]
Dimensions        = X
Spectrometer      = JNM-ECZ600R/S3

Field_Strength    = 14.09636928[T] (60
X_Acq_Duration    = 0.69206016[s]
X_Domain          = Carbon13
X_Freq            = 150.91343039[MHz]
X_Offset          = 100[ppm]
X_Points          = 32768
X_Prescans        = 4
X_Resolution      = 1.44496109[Hz]
X_Sweep           = 47.34848485[kHz]
X_Sweep_Clipped  = 37.87878788[kHz]
Irr_Domain        = Proton
Irr_Freq          = 600.1723046[MHz]
Irr_Offset        = 5[ppm]
Blanking          = 15[us]
Clipped           = TRUE
Scans             = 3200
Total_Scans       = 3200

Relaxation_Delay  = 1[s]
Recvr_Gain        = 56
Temp_Get          = 19.8[dC]
X_90_Width        = 8.8[us]
X_Acq_Time        = 0.69206016[s]
X_Angle           = 30[deg]
X_Atn             = 11[dB]
X_Pulse           = 2.93333333[us]
Irr_Atn_Dec       = 26.162[dB]
Irr_Atn_Dec_Calc = 26.162[dB]
Irr_Atn_Dec_Default_Calc = 26.162[dB]
Irr_Atn_Noise    = 26.162[dB]
Irr_Dec_Bandwidth_Hz = 7.23684211[kHz]
Irr_Dec_Bandwidth_Ppm = 12.05794078[ppm]
Irr_Dec_Freq      = 600.1723046[MHz]
Irr_Dec_Merit_Factor = 2.2
Irr_Decoupling   = TRUE
Irr_Noise        = TRUE
Irr_Noise        = WALTZ
Irr_Offset_Default = 5[ppm]
Irr_Pwidth       = 76[us]
Irr_Pwidth_Default = 76[us]
Irr_Pwidth_Default_Calc = 76[us]
Irr_Pwidth_Templ = 76[us]
Irr_Wurst        = FALSE
Decimation_Rate  = 0
Experiment_Path  = c:\Program Files\J
Initial_Wait     = 1[s]
Noe_Time         = 1[s]
Noe_Time_Flag    = FALSE
Relaxation_Delay_Calc = 0[s]
Relaxation_Delay_Temp = 1[s]
Repetition_Time  = 1.69206016[s]
  
```

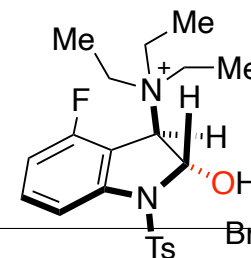

1f

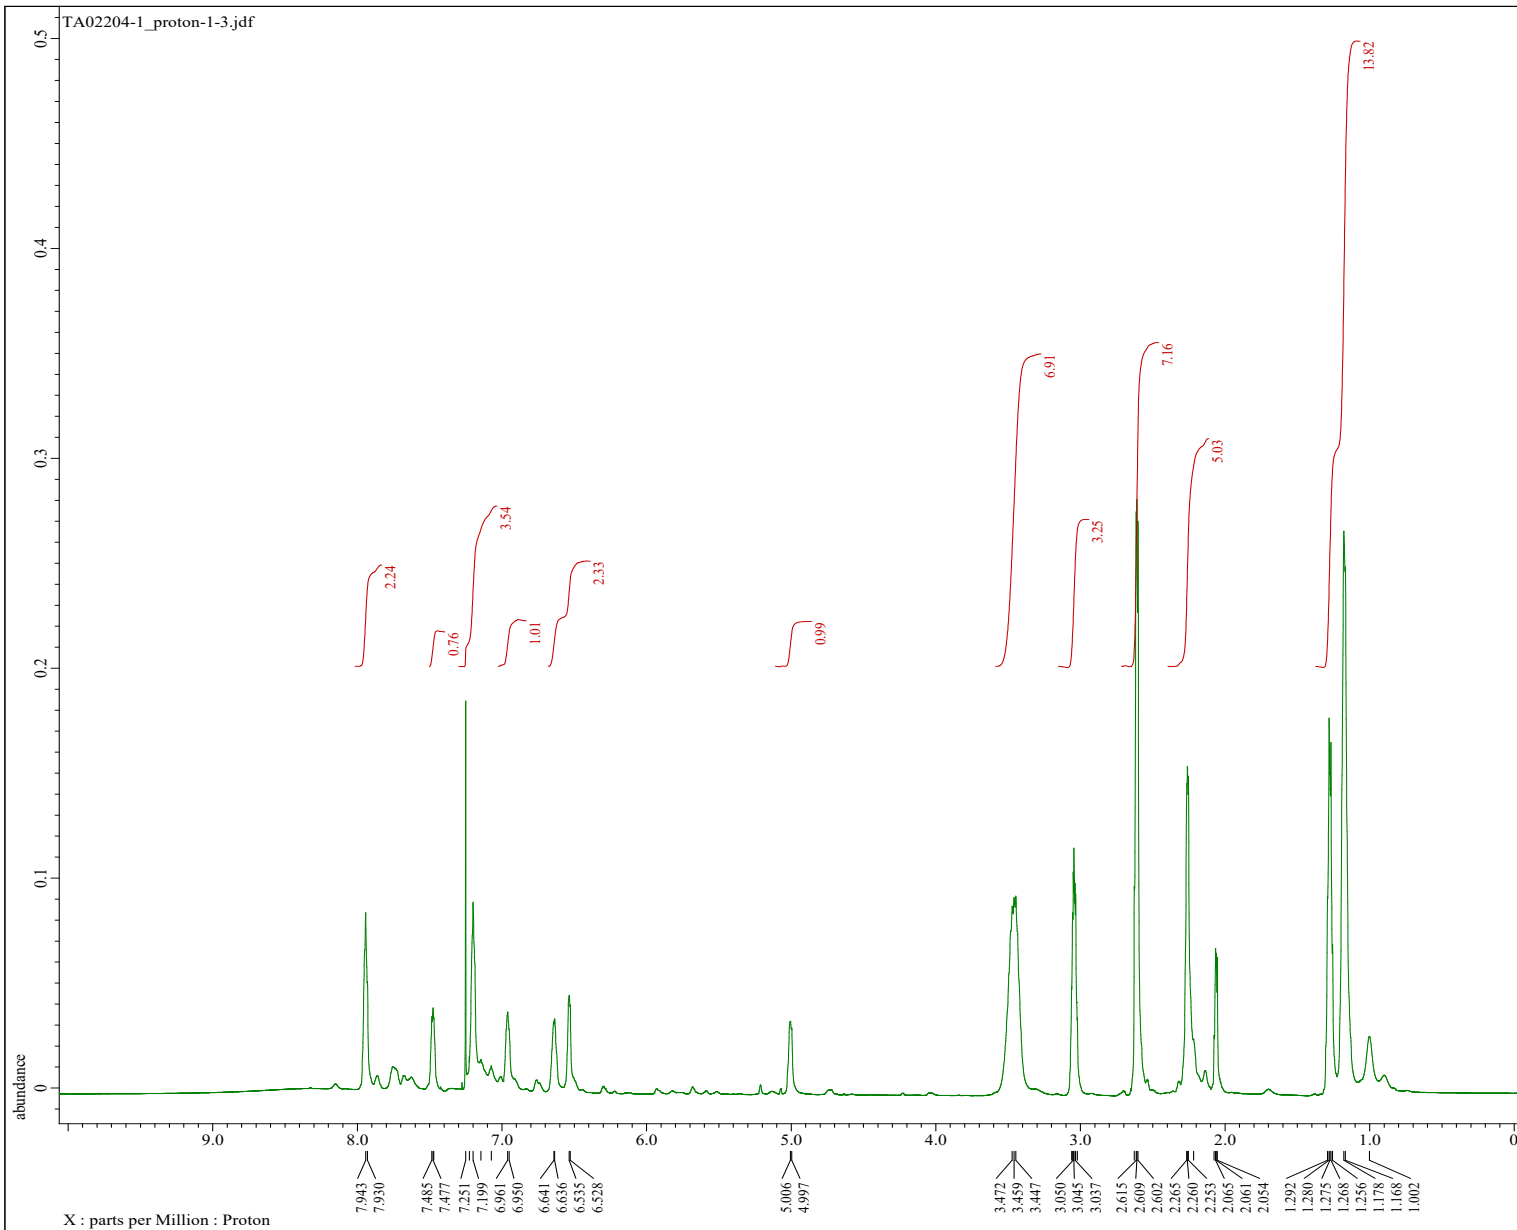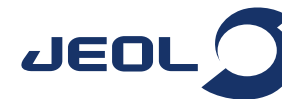

```

Filename      = TA02204-1_proton-1-3.
Author       = delta
Experiment   = proton.jsp
Sample Id    = TA02204-1
Solvent      = CHLOROFORM-D
Actual_Start_Time = 17-DEC-2020 20:22:20
Revision_Time  = 17-DEC-2020 22:02:23

Comment      = single_pulse
Data_Format  = 1D COMPLEX
Dim_Size     = 13107
X_Domain     = Proton
Dim_Title    = Proton
Dim_Units    = [ppm]
Dimensions   = X
Spectrometer = JNM-ECZ600R/S3

Field_Strength = 14.09636928[T] (600[M]
X_Acq_Duration = 1.45227776[s]
X_Domain       = Proton
X_Freq         = 600.1723046[MHz]
X_Offset       = 5[ppm]
X_Points       = 16384
X_Prescans     = 1
X_Resolution   = 0.68857351[Hz]
X_Sweep        = 11.28158845[kHz]
X_Sweep_Clipped = 9.02527076[kHz]
Irr_Domain     = Proton
Irr_Freq       = 600.1723046[MHz]
Irr_Offset     = 5[ppm]
Tri_Domain     = Proton
Tri_Freq       = 600.1723046[MHz]
Tri_Offset     = 5[ppm]
Blanking       = 5[us]
Clipped        = FALSE
Scans          = 8
Total_Scans    = 8

Relaxation_Delay = 5[s]
Recvr_Gain       = 15
Temp_Get         = 20.4[dc]
X_90_Width       = 9.5[us]
X_Acq_Time       = 1.45227776[s]
X_Angle          = 45[deg]
X_Atn            = 8.1[db]
X_Pulse          = 4.75[us]
Irr_Mode         = Off
Tri_Mode         = Off
Dante_Loop       = 500
Dante_Preset    = FALSE
Decimation_Rate = 0
Experiment_Path  = c:\Program Files\JEOL
Initial_Wait     = 1[s]
Phase            = (0, 90, 270, 180, 180)
Preset_Time      = 5[s]
Preset_Time_Flag = FALSE
Relaxation_Delay_Calc = 0[s]
Relaxation_Delay_Temp = 5[s]
Repetition_Time  = 6.45227776[s]

```

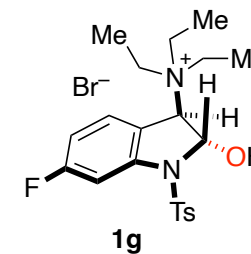

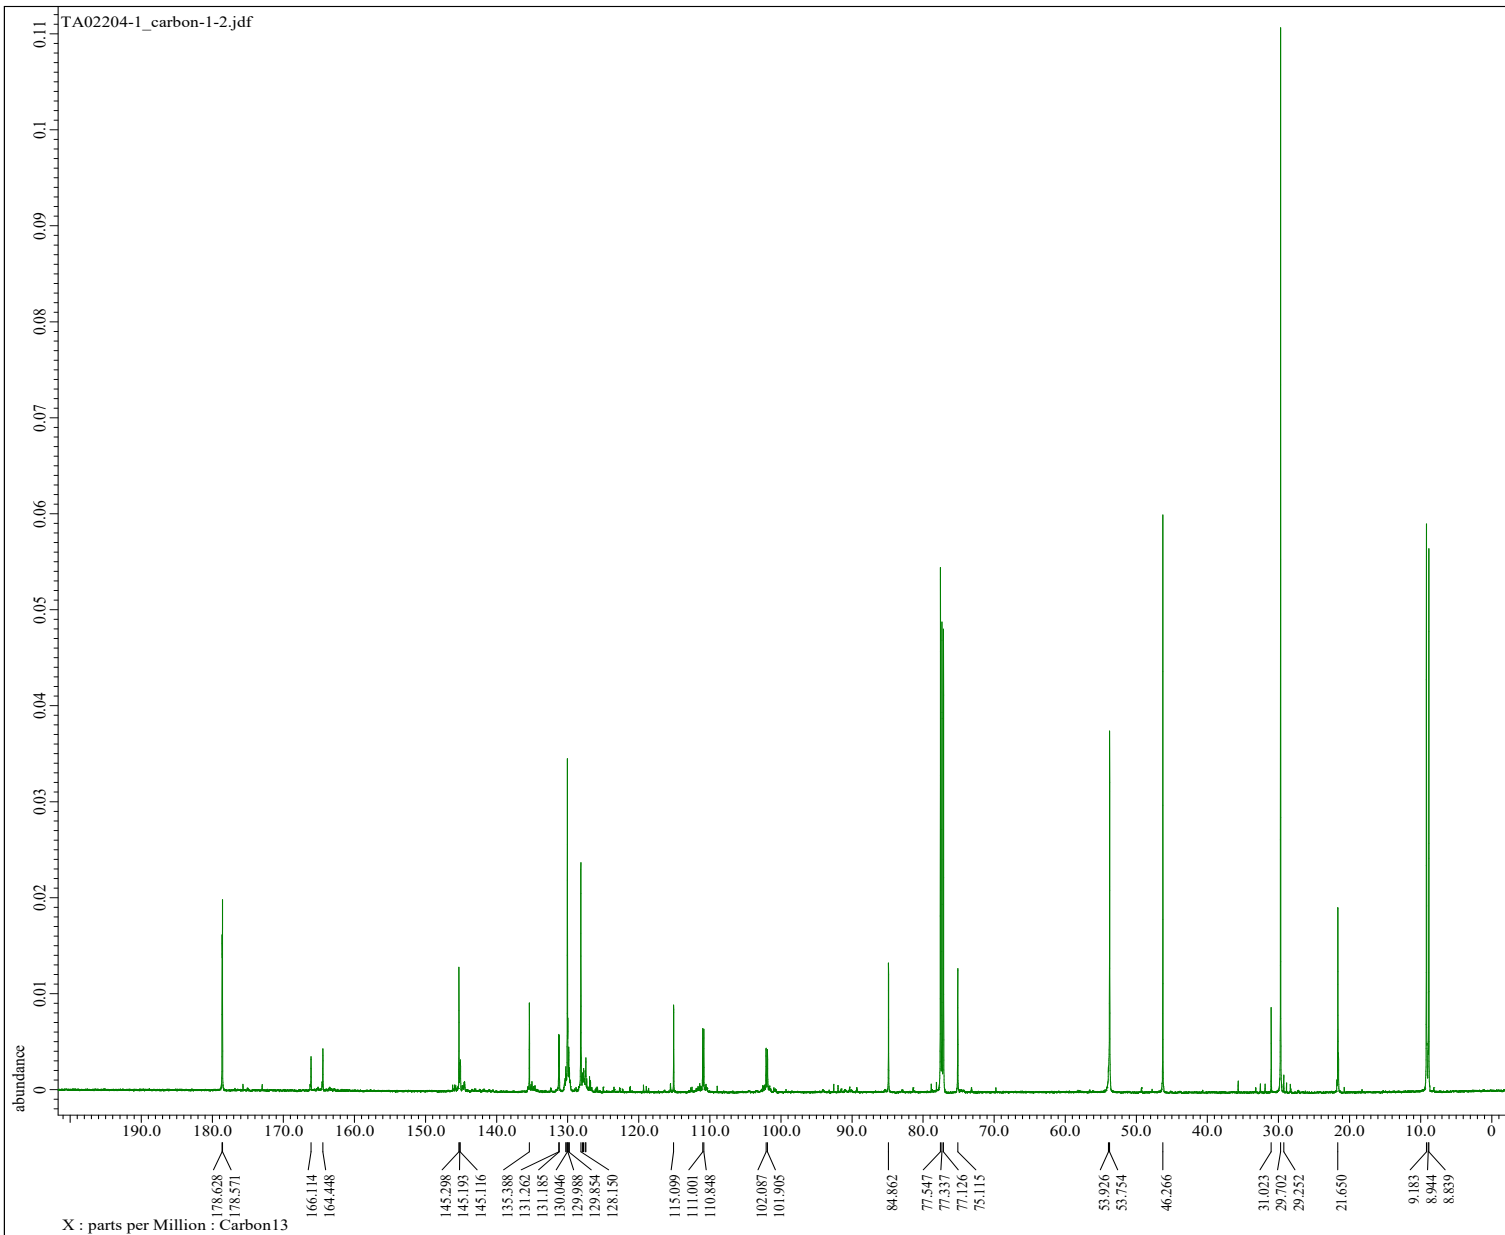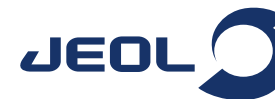

```

Filename      = TA02204-1_carbon-1
Author       = delta
Experiment   = carbon.jsp
Sample_Id    = TA02204-1
Solvent      = CHLOROFORM-D
Actual_Start_Time = 17-DEC-2020 20:25:
Revision_Time = 17-DEC-2020 21:52:

Comment      = single pulse decou
Data_Format  = 1D COMPLEX
Dim_Size     = 26214
X_Domain     = Carbon13
Dim_Title    = Carbon13
Dim_Units    = [ppm]
Dimensions   = X
Spectrometer = JNM-ECZ600R/S3

Field_Strength = 14.09636928[T] (60
X_Acq_Duration = 0.69206016[s]
X_Domain       = Carbon13
X_Freq         = 150.91343039[MHz]
X_Offset       = 100[ppm]
X_Points       = 32768
X_Prescans    = 4
X_Resolution  = 1.44496109[Hz]
X_Sweep       = 47.34848485[kHz]
X_Sweep_Clipped = 37.87878788[kHz]
Irr_Domain    = Proton
Irr_Freq      = 600.1723046[MHz]
Irr_Offset    = 5[ppm]
Blanking      = 15[us]
Clipped       = FALSE
Scans         = 2675
Total_Scans   = 2675

Relaxation_Delay = 1[s]
Recvr_Gain       = 56
Temp_Get         = 20.4[dc]
X_90_Width      = 8.8[us]
X_Acq_Time      = 0.69206016[s]
X_Angle         = 30[deg]
X_Atn           = 11[db]
X_Pulse         = 2.93333333[us]
Irr_Atn_Dec     = 26.162[db]
Irr_Atn_Dec_Calc = 26.162[db]
Irr_Atn_Dec_Default_Calc = 26.162[db]
Irr_Atn_Noise  = 26.162[db]
Irr_Dec_Bandwidth_Hz = 7.23684211[kHz]
Irr_Dec_Bandwidth_Fpm = 12.03794078[ppm]
Irr_Dec_Freq    = 600.1723046[MHz]
Irr_Dec_Merit_Factor = 2.2
Irr_Decoupling = TRUE
Irr_Noise       = TRUE
Irr_Noise       = WALTZ
Irr_Offset_Default = 5[ppm]
Irr_Pwidth      = 76[us]
Irr_Pwidth_Default = 76[us]
Irr_Pwidth_Default_Calc = 76[us]
Irr_Pwidth_Templ = 76[us]
Irr_Wurst       = FALSE
Decimation_Rate = 0
Experiment_Path = c:\Program Files\J
Initial_Wait     = 1[s]
Noe_Time         = 1[s]
Noe_Time_Flag    = FALSE
Relaxation_Delay_Calc = 0[s]
Relaxation_Delay_Temp = 1[s]
Repetition_Time = 1.69206016[s]

```

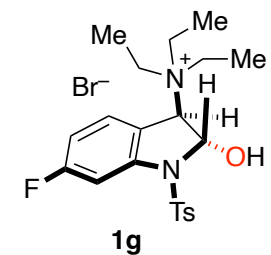

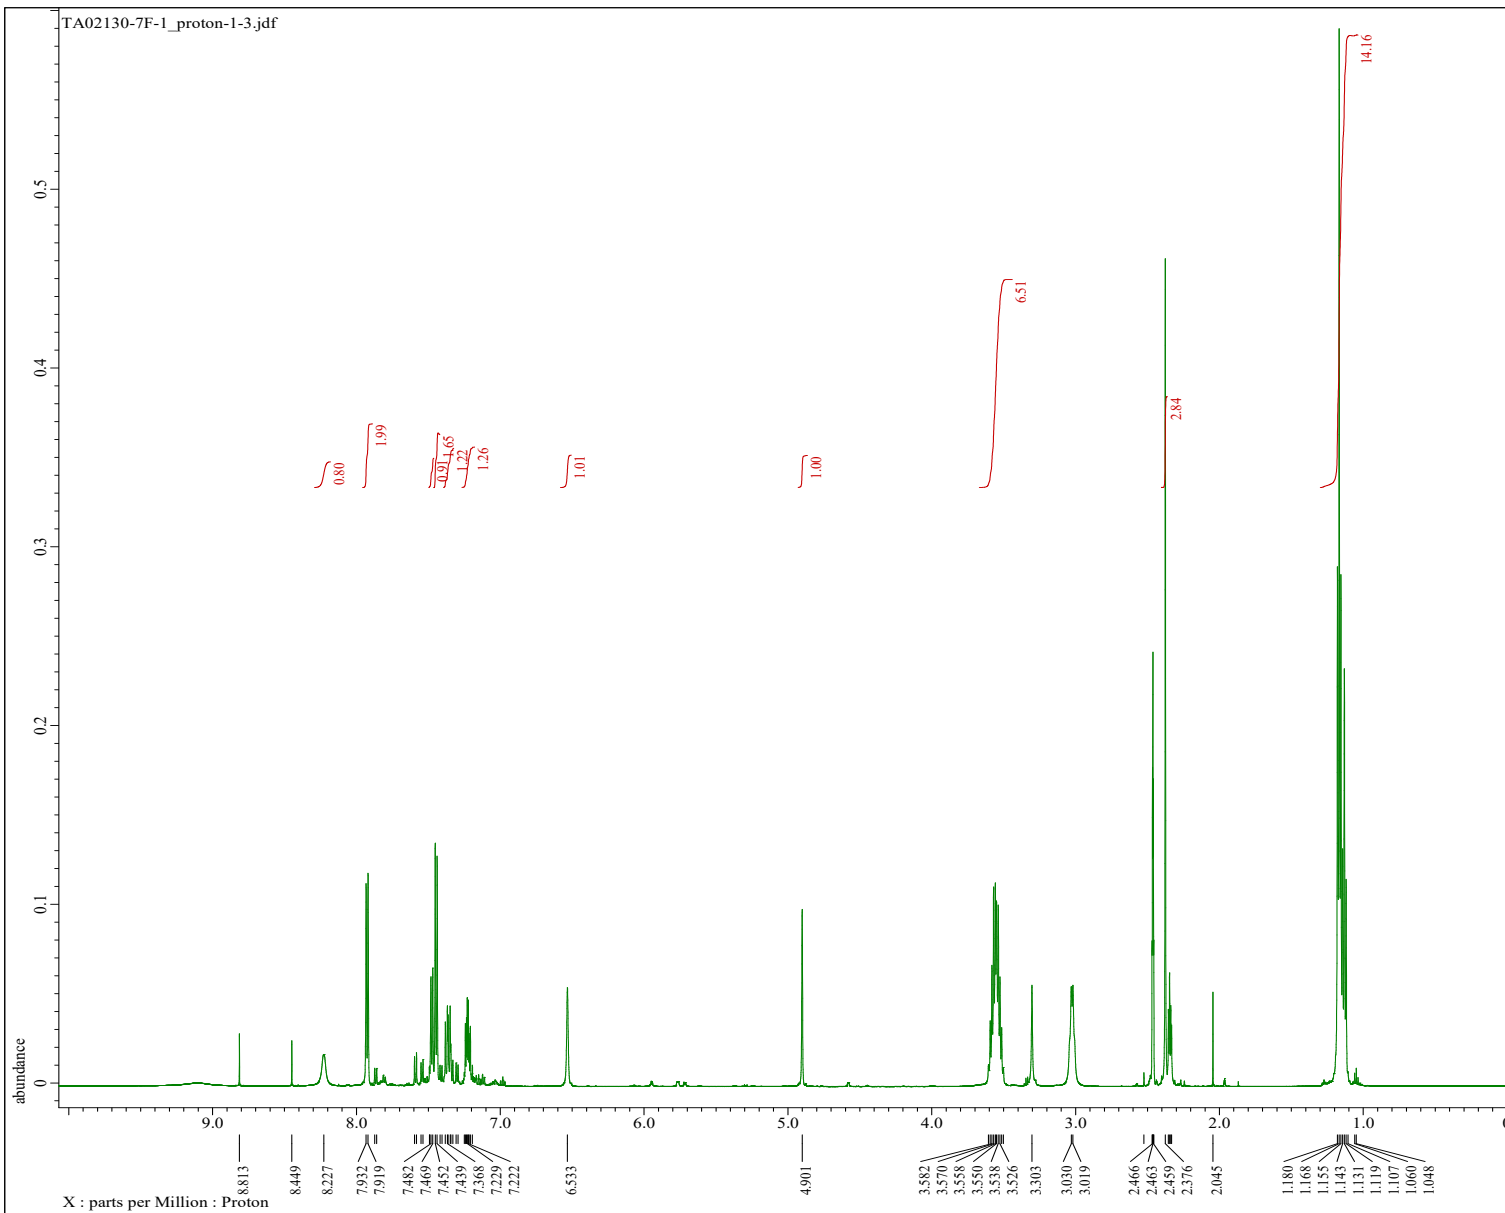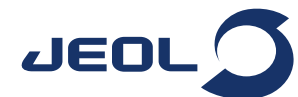

```

Filename      = TA02130-7F-1_proton-1
Author       = delta
Experiment   = proton.jxp
Sample Id    = TA02130-7F-1
Solvent      = DMSO-D6
Actual_Start_Time = 14-NOV-2020 14:51:51
Revision_Time   = 14-NOV-2020 15:19:39

Comment      = single pulse-Ring-7F-
Data Format   = 1D COMPLEX
Dim Size     = 26214
X_Domain     = Proton
Dim_Title    = Proton
Dim_Units    = [ppm]
Dimensions   = 2
Spectrometer = JNM-ECZ600R/S3

Field_Strength = 14.09636928[T] (600[M]
X_Acq_Duration = 2.9097984[s]
X_Domain       = Proton
X_Freq         = 600.1723046[MHz]
X_Offset       = 5 [ppm]
X_Points       = 32768
X_Prescans     = 1
X_Resolution  = 0.34366642 [Hz]
X_Sweep        = 11.26126126 [kHz]
X_Sweep_Clipped = 9.00900901 [kHz]
Irr_Domain     = Proton
Irr_Freq       = 600.1723046[MHz]
Irr_Offset     = 5 [ppm]
Tri_Domain     = Proton
Tri_Freq       = 600.1723046[MHz]
Tri_Offset     = 5 [ppm]
Blanking       = FALSE
Clipped        = FALSE
Scans          = 16
Total_Scans    = 16

Relaxation_Delay = 1 [s]
Recvr_Gain       = 36
Temp_Get         = 20.4 [dC]
X_90_Width      = 8.5 [us]
X_Acq_Time      = 2.9097984 [s]
X_Angle         = 45 [deg]
X_Atn           = 0.1 [dB]
X_Pulse         = 4.75 [us]
Irr_Mode        = Off
Tri_Mode        = Off
Dante_Loop      = 100
Dante_Presat    = FALSE
Decimation_Rate = 0
Experiment_Path = c:\Program Files\JEOL
Initial_Wait    = 1 [s]
Phase           = (0, 90, 270, 180, 180)
Presat_Time     = 1 [s]
Presat_Time_Flag = FALSE
Relaxation_Delay_Calc = 0 [s]
Relaxation_Delay_Temp = 1 [s]
Repetition_Time = 3.9097984 [s]
  
```

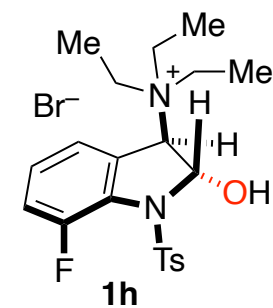



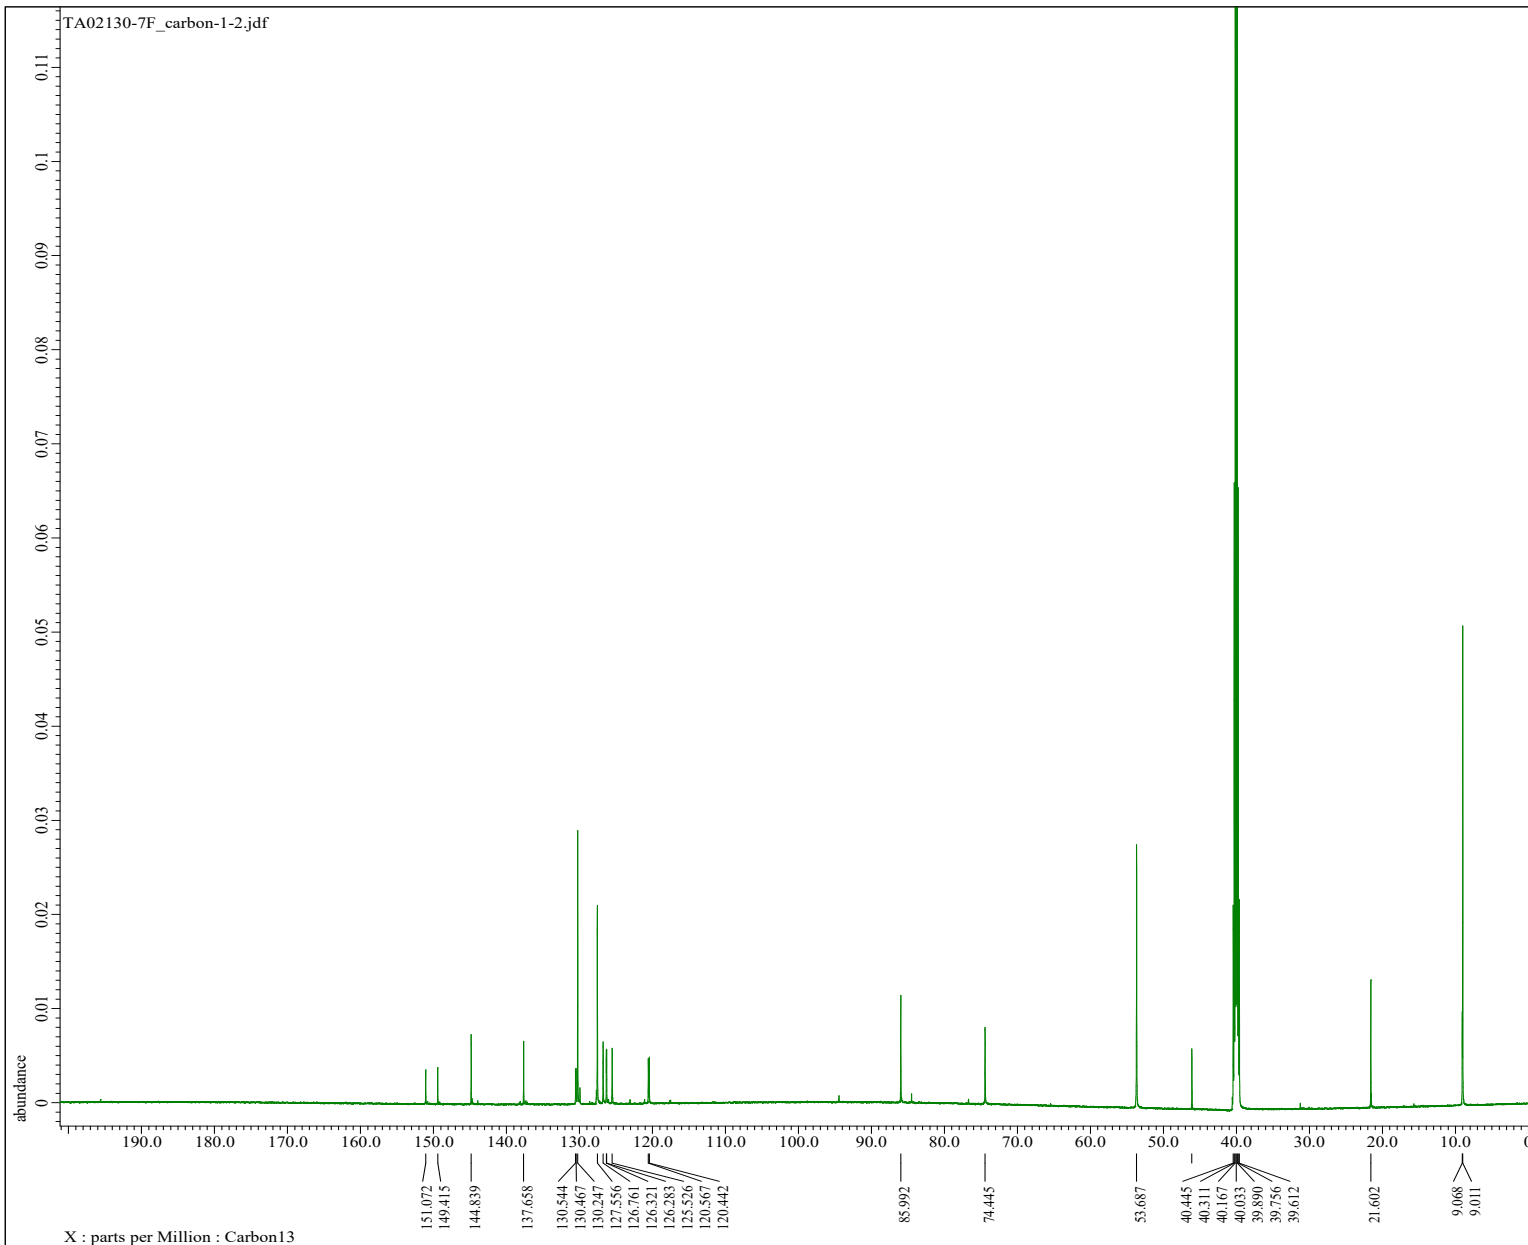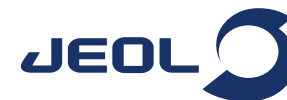

```

Filename      = TA02130-7F_carbon-
Author       = delta
Experiment   = carbon.jxp
Sample_Id    = TA02130-7F
Solvent      = DMSO-D6
Actual_Start Time = 19-NOV-2020 20:22:
Revision_Time = 19-NOV-2020 21:51:

Comment      = single pulse decou
Data_Format  = 1D COMPLEX
Dim_Size     = 26214
X_Domain    = Carbon13
Dim_Title   = carbon13
Dim_Units   = [ppm]
Dimensions   = X
Spectrometer = JNM-ECZ600R/S3

Field_Strength = 14.09636928[T] (60
X_Acq_Duration = 0.69206016[s]
X_Domain      = Carbon13
X_Freq       = 150.91343039[MHz]
X_Offset     = 100[ppm]
X_Points     = 32768
X_Prescans   = 4
X_Resolution = 1.44496109[Hz]
X_Sweep      = 47.34848485[kHz]
X_Sweep_Clipped = 37.87878788[kHz]
Irr_Domain   = Proton
Irr_Freq    = 600.1723046[MHz]
Irr_Offset  = 5[ppm]
Blanking    = 15[us]
Clipped     = FALSE
Scans       = 2729
Total_Scans = 2729

Relaxation_Delay = 1[s]
Recvr_Gain      = 56
Temp_Get       = 20.5[dc]
X_90_Width    = 8.8[us]
X_Acq_Time    = 0.69206016[s]
X_Angle       = 30[deg]
X_Atn        = 1[db]
X_Pulse      = 2.93333333[us]
Irr_Atn_Dec  = 26.162[db]
Irr_Atn_Dec_Calc = 26.162[db]
Irr_Atn_Dec_Default_Calc = 26.162[db]
Irr_Atn_Noise = 26.162[db]
Irr_Dec_Bandwidth_Hz = 7.23684211[kHz]
Irr_Dec_Bandwidth_Fpm = 12.05794078[ppm]
Irr_Dec_Freq  = 600.1723046[MHz]
Irr_Dec_Merit_Factor = 2.2
Irr_Decoupling = TRUE
Irr_Noise    = TRUE
Irr_Noise    = WALTZ
Irr_Offset_Default = 5[ppm]
Irr_Pwidth   = 76[us]
Irr_Pwidth_Default = 76[us]
Irr_Pwidth_Default_Calc = 76[us]
Irr_Pwidth_Templ = 76[us]
Irr_Wurst   = FALSE
Decimation_Rate = 0
Experiment_Path = c:\Program Files\J
Initial_Wait  = 1[s]
Noe_Time     = 1[s]
Noe_Time_Flag = FALSE
Relaxation_Delay_Calc = 0[s]
Relaxation_Delay_Temp = 1[s]
Repetition_Time = 1.69206016[s]

```

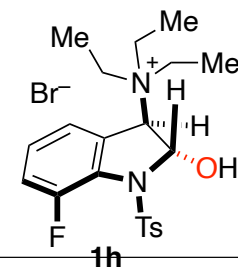

TA02078-3-5H\_proton-1-2.jdf

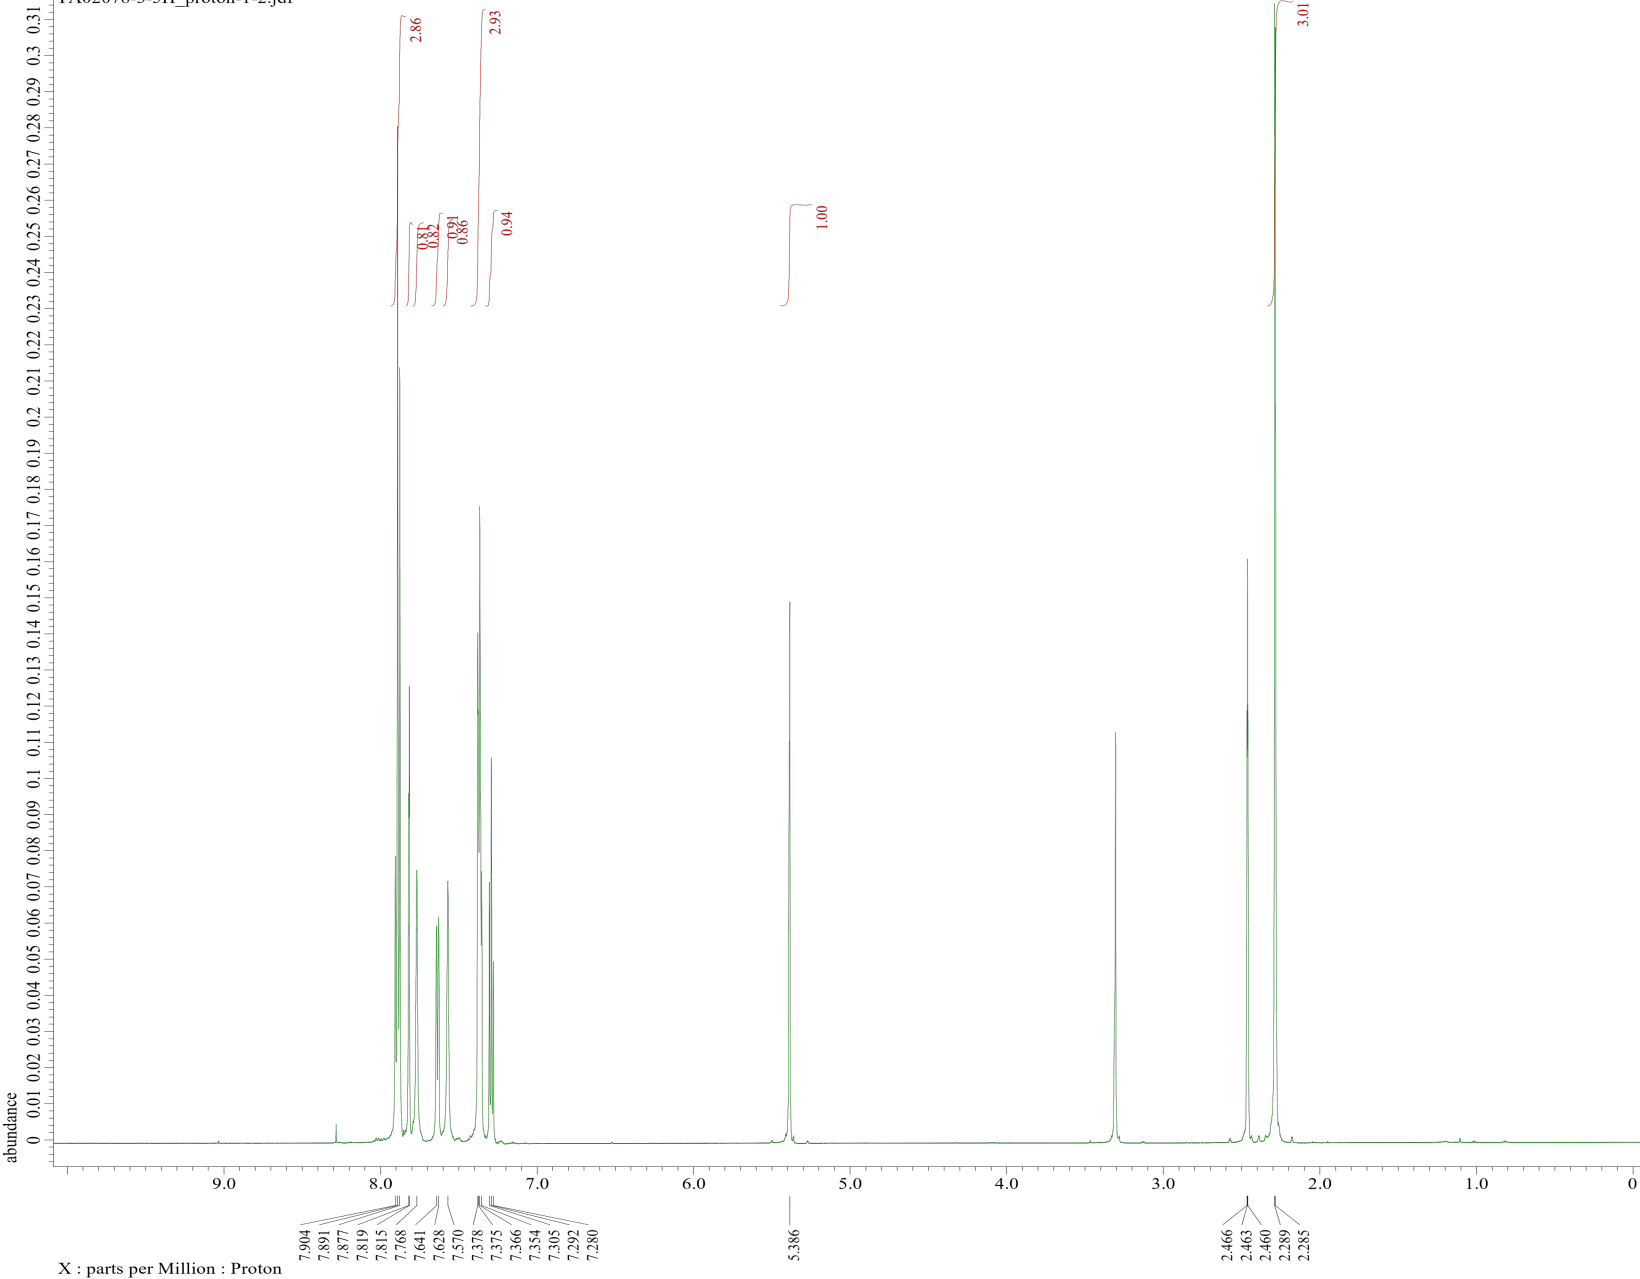

```

---- PROCESSING PARAMETERS ----
sexp( 0.2[Hz], 0.0[s] )
trapezoid( 0[%], 0[%], 80[%], 100[%] )
zerofill( 1, TRUE )
fft( 1, TRUE, TRUE )
machinephase
ppm
    以下に由来: TA02078-3-5H_proton-1-1.jdf
    
```

```

Filename      = TA02078-3-5H_proton-1
Author       = delta
Experiment   = proton.jxp
Sample_Id    = TA02078-3-5H
Solvent      = DMSO-d6
Actual_Start_Time = 6-NOV-2020 20:12:23
Revision_time = 6-NOV-2020 20:14:35

Comment      = single_pulse-5H
Data_Format  = 1D COMPLEX
Dim_Size     = 26214
X_Domain     = Proton
Dim_Title    = Proton
Dim_Units    = [ppm]
Dimensions   = X
Spectrometer = JNM-ECZ600R/S3

Field_Strength = 14.09636928[T] (600[M]
X_Acq_Duration = 2.90455552[s]
X_Domain       = Proton
X_Freq         = 600.1723046[MHz]
X_Offset       = 5[ppm]
X_Fpoints      = 32768
X_Prescans     = 1
X_Resolution   = 0.34428676[Hz]
X_Sweep        = 11.28158845[kHz]
X_Sweep_Clipped = 9.02527076[kHz]
Irr_Domain     = Proton
Irr_Freq       = 600.1723046[MHz]
Irr_Offset     = 5[ppm]
Tri_Domain     = Proton
Tri_Freq       = 600.1723046[MHz]
Tri_Offset     = 5[ppm]
Blanking       = FALSE
Clipped        = FALSE
Scans          = 16
Total_Scans    = 16

Relaxation_Delay = 1[s]
Recvr_Gain       = 35
Temp_Set         = 19.5[dC]
X_90_Width       = 9.5[us]
X_Acq_Time       = 2.90455552[s]
X_Angle          = 45[deg]
X_Attn           = 8.1[dB]
X_Pulse          = 4.75[us]
Irr_Mode         = Off
Tri_Mode         = Off
Dante_Loop       = 100
Dante_Preset    = FALSE
Declination_Rate = 0
Experiment_Path  = c:\Program Files\JEOL
Initial_Wait     = 1[s]
Phase            = {0, 90, 270, 180, 180}
Preset_Time      = 1[s]
Preset_Time_Flag = FALSE
Relaxation_Delay_Calc = 0[s]
Relaxation_Delay_Temp = 1[s]
Repetition_Time = 3.90455552[s]
    
```

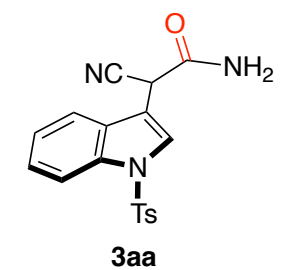

TA02078-3-5H-13C\_carbon-1-3.jdf

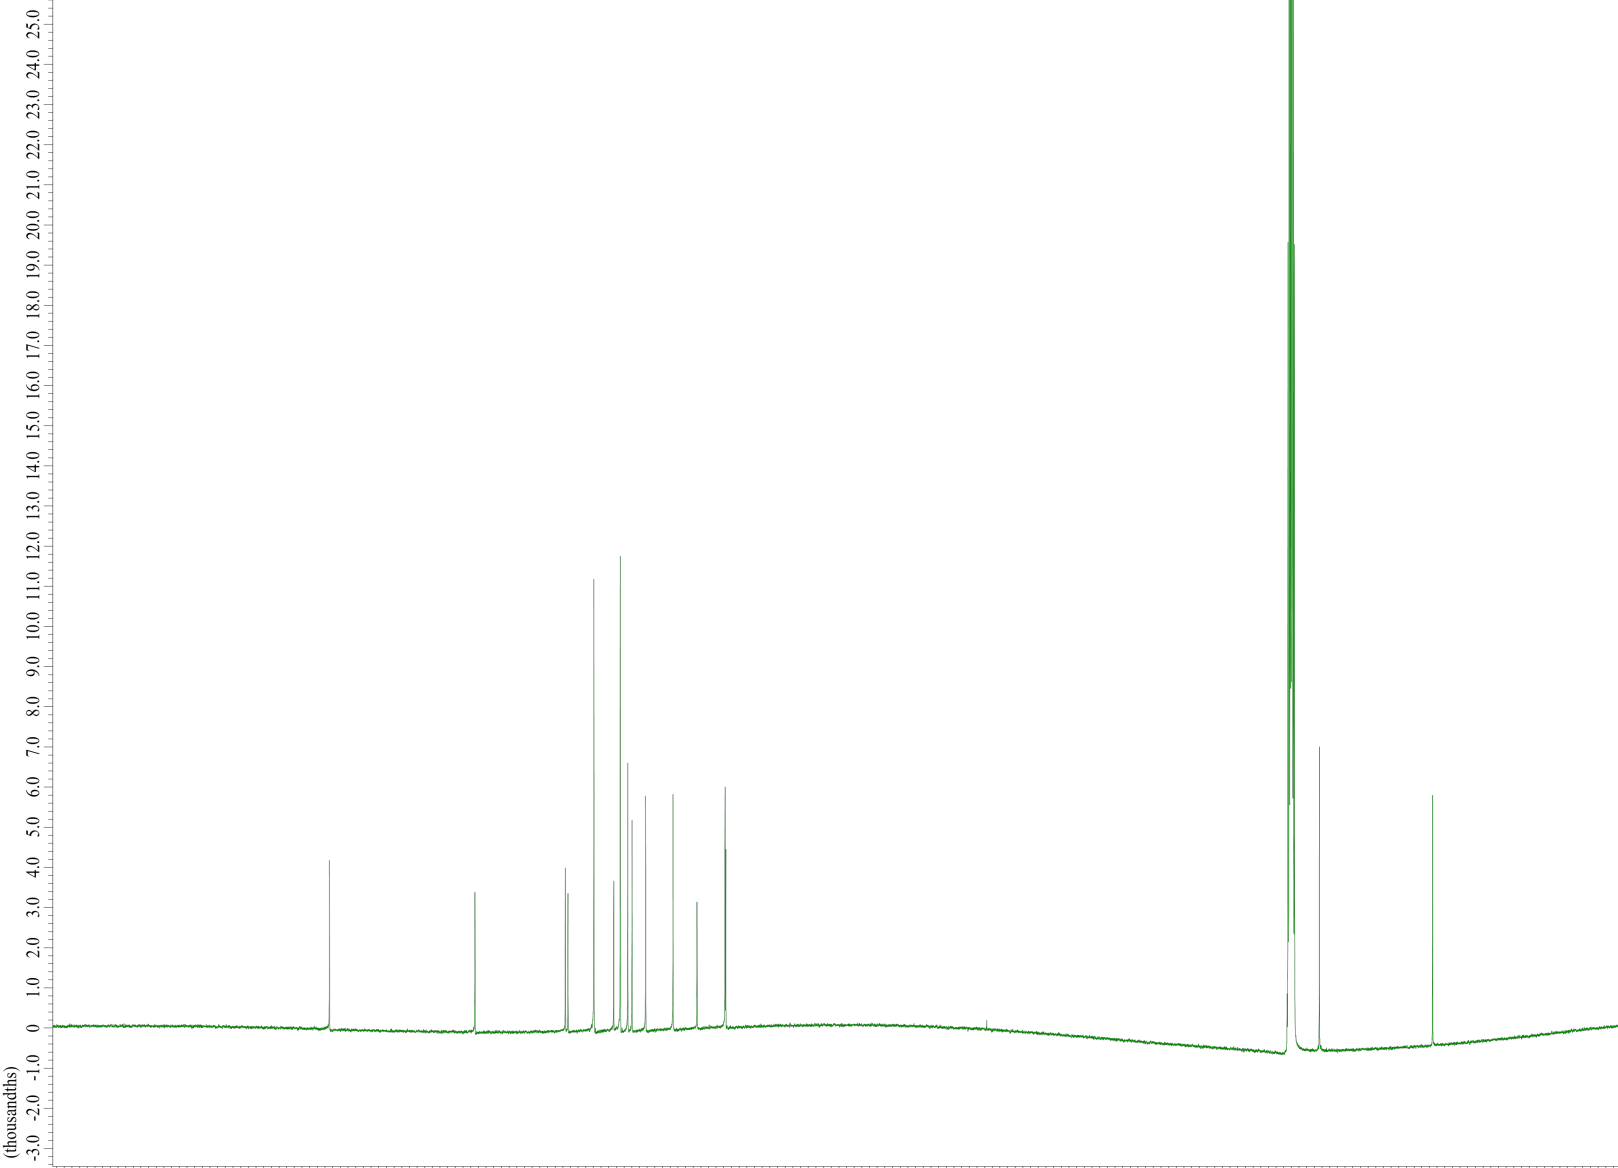

X : parts per Million : Carbon13

165.415  
146.447  
134.661  
134.316  
130.936  
128.351  
127.489  
126.522  
125.957  
124.195  
120.624  
117.503  
113.836  
113.749

40.455  
40.301  
40.158  
40.024  
39.880  
39.746  
39.602  
36.347

21.592

```

---- PROCESSING PARAMETERS ----
sexp( 2.0[Hz], 0.0[s] )
trapezoid( 0[%], 0[%], 80[%], 100[%] )
zerofill( 1, TRUE )
fft( 1, TRUE, TRUE )
machinephase
ppm
    
```

以下に由来: TA02078-3-5H-13C\_carbon-1-1.jdf

```

Filename           = TA02078-3-5H-13C_c
Author             = delta
Experiment         = carbon.jxp
Sample_Id         = TA02078-3-5H-13C
Solvent           = DMSO-D6
Actual_Start_Time = 7-NOV-2020 08:13:
Revision_Time     = 7-NOV-2020 12:45:

Comment           = single pulse decou
Data_Format       = 1D COMPLEX
Dim_Size         = 26214
X_Domain         = Carbon13
Dim_Title        = carbon13
Dim_Units        = [ppm]
Dimensions       = X
Spectrometer      = JNM-ECZ600R/S3

Field_Strength    = 14.09636928[T] (60
X_Acq_Duration   = 0.69206016[s]
X_Domain         = Carbon13
X_Freq           = 150.91343039[MHz]
X_Offset         = 100[ppm]
X_Points         = 32768
X_Prescans       = 4
X_Resolution     = 1.44496109[Hz]
X_Sweep          = 47.34848485[kHz]
X_Sweep_Clipped = 37.87878788[kHz]
IRF_Domain       = Proton
IRF_Freq         = 600.1723046[MHz]
IRF_Offset       = 5[ppm]
Blanking         = 15[us]
Clipped          = TRUE
Scans            = 8167
Total_Scans      = 8167

Relaxation_Delay = 1[s]
Recvr_Gain       = 56
Temp_Get         = 20[dc]
X_90_Width      = 8.8[us]
X_Acq_Time      = 0.69206016[s]
X_Angle         = 30[deg]
X_Atn           = 11[db]
X_Pulse         = 2.93333333[us]
IRF_Atn_Dec     = 26.162[db]
IRF_Atn_Dec_Calc = 26.162[db]
IRF_Atn_Dec_Default_Calc = 26.162[db]
IRF_Atn_Noise   = 26.162[db]
IRF_Dec_Bandwidth_Hz = 7.23684211[kHz]
IRF_Dec_Bandwidth_Ppm = 12.05794078[ppm]
IRF_Dec_Freq    = 600.1723046[MHz]
IRF_Dec_Merit_Factor = 2.2
IRF_Decoupling  = TRUE
IRF_Noise       = TRUE
IRF_Noise       = WALTZ
IRF_Offset_Default = 5[ppm]
IRF_Width       = 76[us]
IRF_Width_Default = 76[us]
IRF_Width_Default_Calc = 76[us]
IRF_Width_Templ = 76[us]
IRF_Wurst       = FALSE
Decimation_Rate = 0
Experiment_Path = c:\Program Files\J
Initial_Wait     = 1[s]
Noe_Time        = 1[s]
Noe_Time_Flag   = FALSE
Relaxation_Delay_Calc = 0[s]
Relaxation_Delay_Temp = 1[s]
Repetition_Time = 1.69206016[s]
    
```

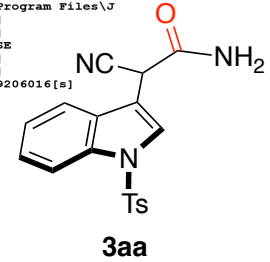

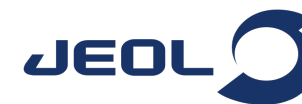

Filename = TA02084-Bs 1\_proton-1  
Author = delta  
Experiment = proton\_1xp  
Sample\_Id = TA02084-Bs 1  
Solvent = DMSO-D6  
Actual\_Start\_Time = 11-NOV-2020 08:43:52  
Revision\_Time = 11-NOV-2020 08:55:37  
Comment = single\_pulse-Bs  
Data\_Format = 1D\_COMPLEX  
Dim\_Size = 26214  
X\_Domain = Proton  
Dim\_Title = Proton  
Dim\_Units = [ppm]  
Dimensions = X  
Spectrometer = JNM-ECP600R/S3  
Field\_Strength = 14.09636928[T] (600[M  
X\_Acq\_Duration = 2.90455552[s]  
X\_Domain = Proton  
X\_Freq = 600.1723046[MHz]  
X\_Offset = 5[ppm]  
X\_Points = 32768  
X\_Prescans = 1  
X\_Resolution = 0.34428676[Hz]  
X\_Sweep = 11.28158845[kHz]  
X\_Sweep\_Clipped = 9.02527076[kHz]  
Irr\_Domain = Proton  
Irr\_Freq = 600.1723046[MHz]  
Irr\_Offset = 5[ppm]  
Tri\_Domain = Proton  
Tri\_Freq = 600.1723046[MHz]  
Tri\_Offset = 5[ppm]  
Blanking = 5[us]  
Clipped = TRUE  
Scans = 16  
Total\_Scans = 16  
Relaxation\_Delay = 1[s]  
Recvr\_Gain = 56  
Temp\_Get = 19.5[dc]  
X\_90\_Width = 9.5[us]  
X\_Acq\_Time = 2.90455552[s]  
X\_Angle = 45[deg]  
X\_Atn = 8.1[dB]  
X\_Pulse = 4.75[us]  
Irr\_Mode = OFF  
Tri\_Mode = OFF  
Dante\_Loop = 100  
Dante\_Presat = FALSE  
Decimation\_Rate = 0  
Experiment\_Path = c:\Program Files\JEOL  
Initial\_Wait = 1[s]  
Phase = {0, 90, 270, 180, 180  
Presat\_Time = 1[s]  
Presat\_Time\_Flag = FALSE  
Relaxation\_Delay\_Calc = 0[s]  
Relaxation\_Delay\_Temp = 1[s]  
Repetition\_Time = 3.90455552[s]

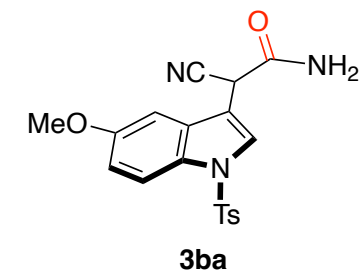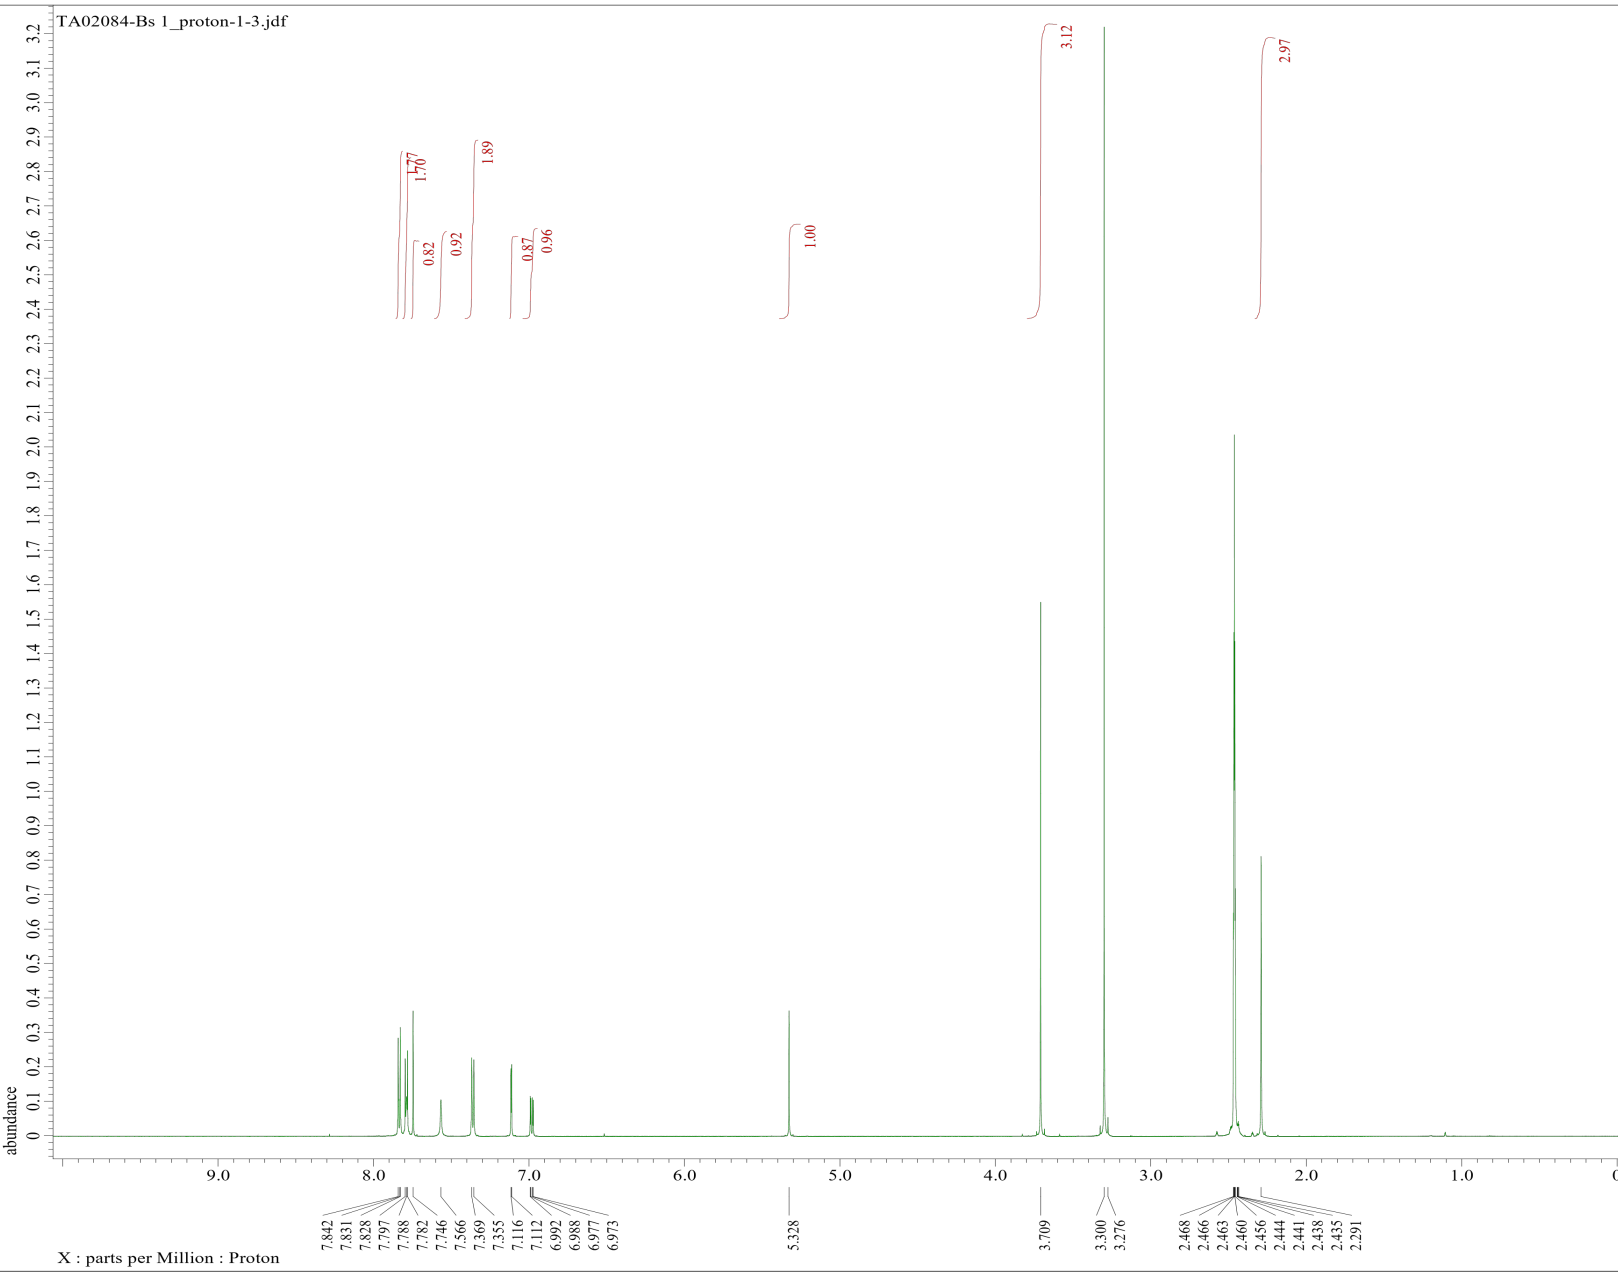

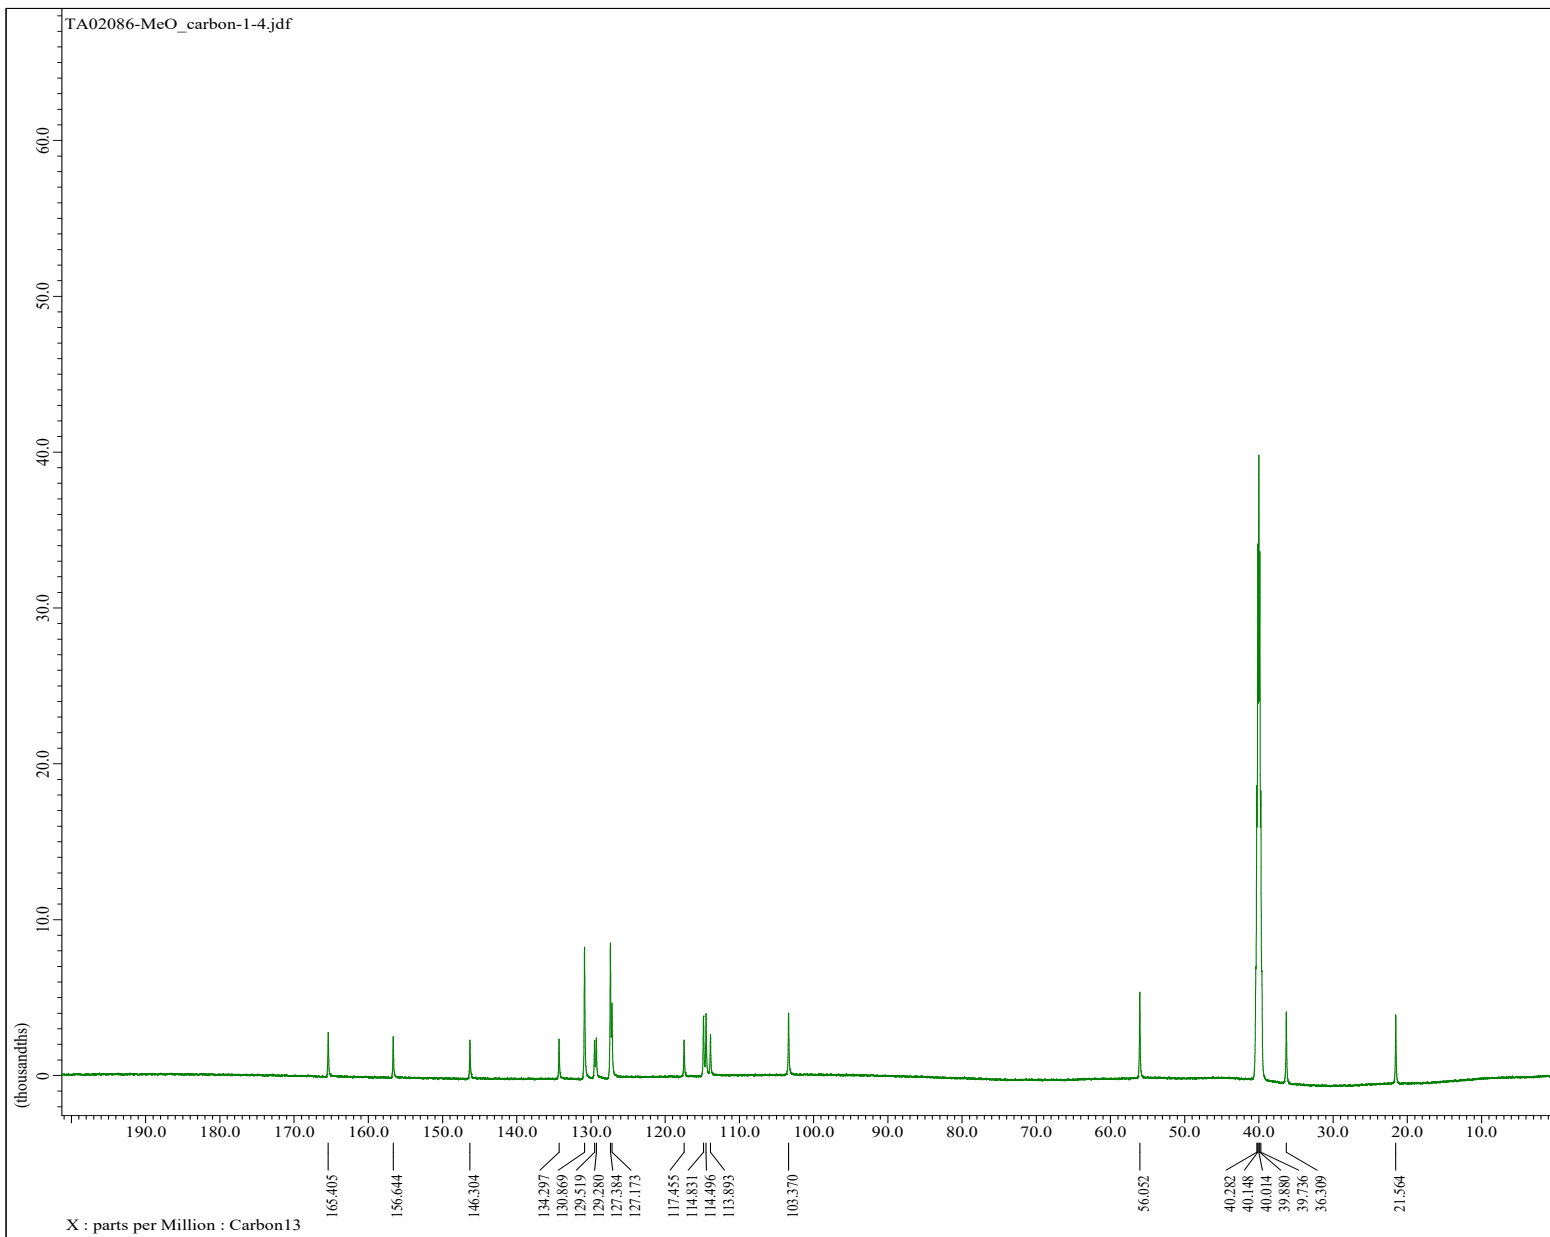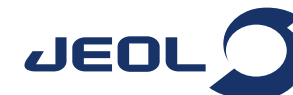

```

Filename           = TA02086-MeO_carbon
Author             = delta
Experiment         = carbon_jmp
Sample_Id         = TA02086-MeO
Solvent           = DMSO-D6
Actual_Start_Time = 10-NOV-2020 21:13:
Revision_Time     = 18-JAN-2021 08:07:

Comment           = single pulse decou
Data_Format      = 1D COMPLEX
Dim_Size         = 26214
X_Domain         = Carbon13
Dim_Title        = Carbon13
Dim_Units        = [ppm]
Dimensions       = X
Spectrometer     = JNM-ECZ600R/S3

Field_Strength   = 14.09636928[T] (60
X_Acq_Duration  = 0.69206016[s]
X_Domain        = Carbon13
X_Freq          = 150.91343039[MHz]
X_Offset        = 100[ppm]
X_Points        = 32768
X_Prescans      = 4
X_Resolution    = 1.44496109[Hz]
X_Sweep         = 47.34848485[kHz]
X_Sweep_Clipped = 37.87878788[kHz]
Irr_Domain      = Proton
Irr_Freq        = 600.1723046[MHz]
Irr_Offset      = 5[ppm]
Blanking        = 15[us]
Clipped         = FALSE
Scans           = 5000
Total_Scans     = 5000

Relaxation_Delay = 1[s]
Recvr_Gain       = 56
Temp_Get         = 19.8[dc]
X_90_Width      = 8.8[us]
X_Acq_Time      = 0.69206016[s]
X_Angle         = 30[deg]
X_Atn           = 11[db]
X_Pulse         = 2.93333333[us]
Irr_Atn_Dec     = 26.162[db]
Irr_Atn_Dec_Calc = 26.162[db]
Irr_Atn_Dec_Default_Calc = 26.162[db]
Irr_Atn_No     = 26.162[db]
Irr_Dec_Bandwidth_Hz = 7.23684211[kHz]
Irr_Dec_Bandwidth_Fpm = 12.05794078[ppm]
Irr_Dec_Freq    = 600.1723046[MHz]
Irr_Dec_Merit_Factor = 2.2
Irr_Decoupling = TRUE
Irr_Noise       = WALTZ
Irr_Offset_Default = 5[ppm]
Irr_Pwidth      = 76[us]
Irr_Pwidth_Default = 76[us]
Irr_Pwidth_Default_Calc = 76[us]
Irr_Pwidth_Templ = 76[us]
Irr_Wurst       = FALSE
Decimation_Rate = 0
Experiment_Path = c:\Program Files\J
Initial_Wait    = 1[s]
Noe_Time        = 1[s]
Noe_Time_Flag   = FALSE
Relaxation_Delay_Calc = 1[s]
Relaxation_Delay_Temp = 1[s]
Repetition_Time = 1.69206016[s]
  
```

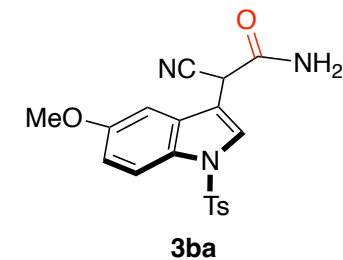

TA02082-R1-5Cl\_proton-1-5.jdf

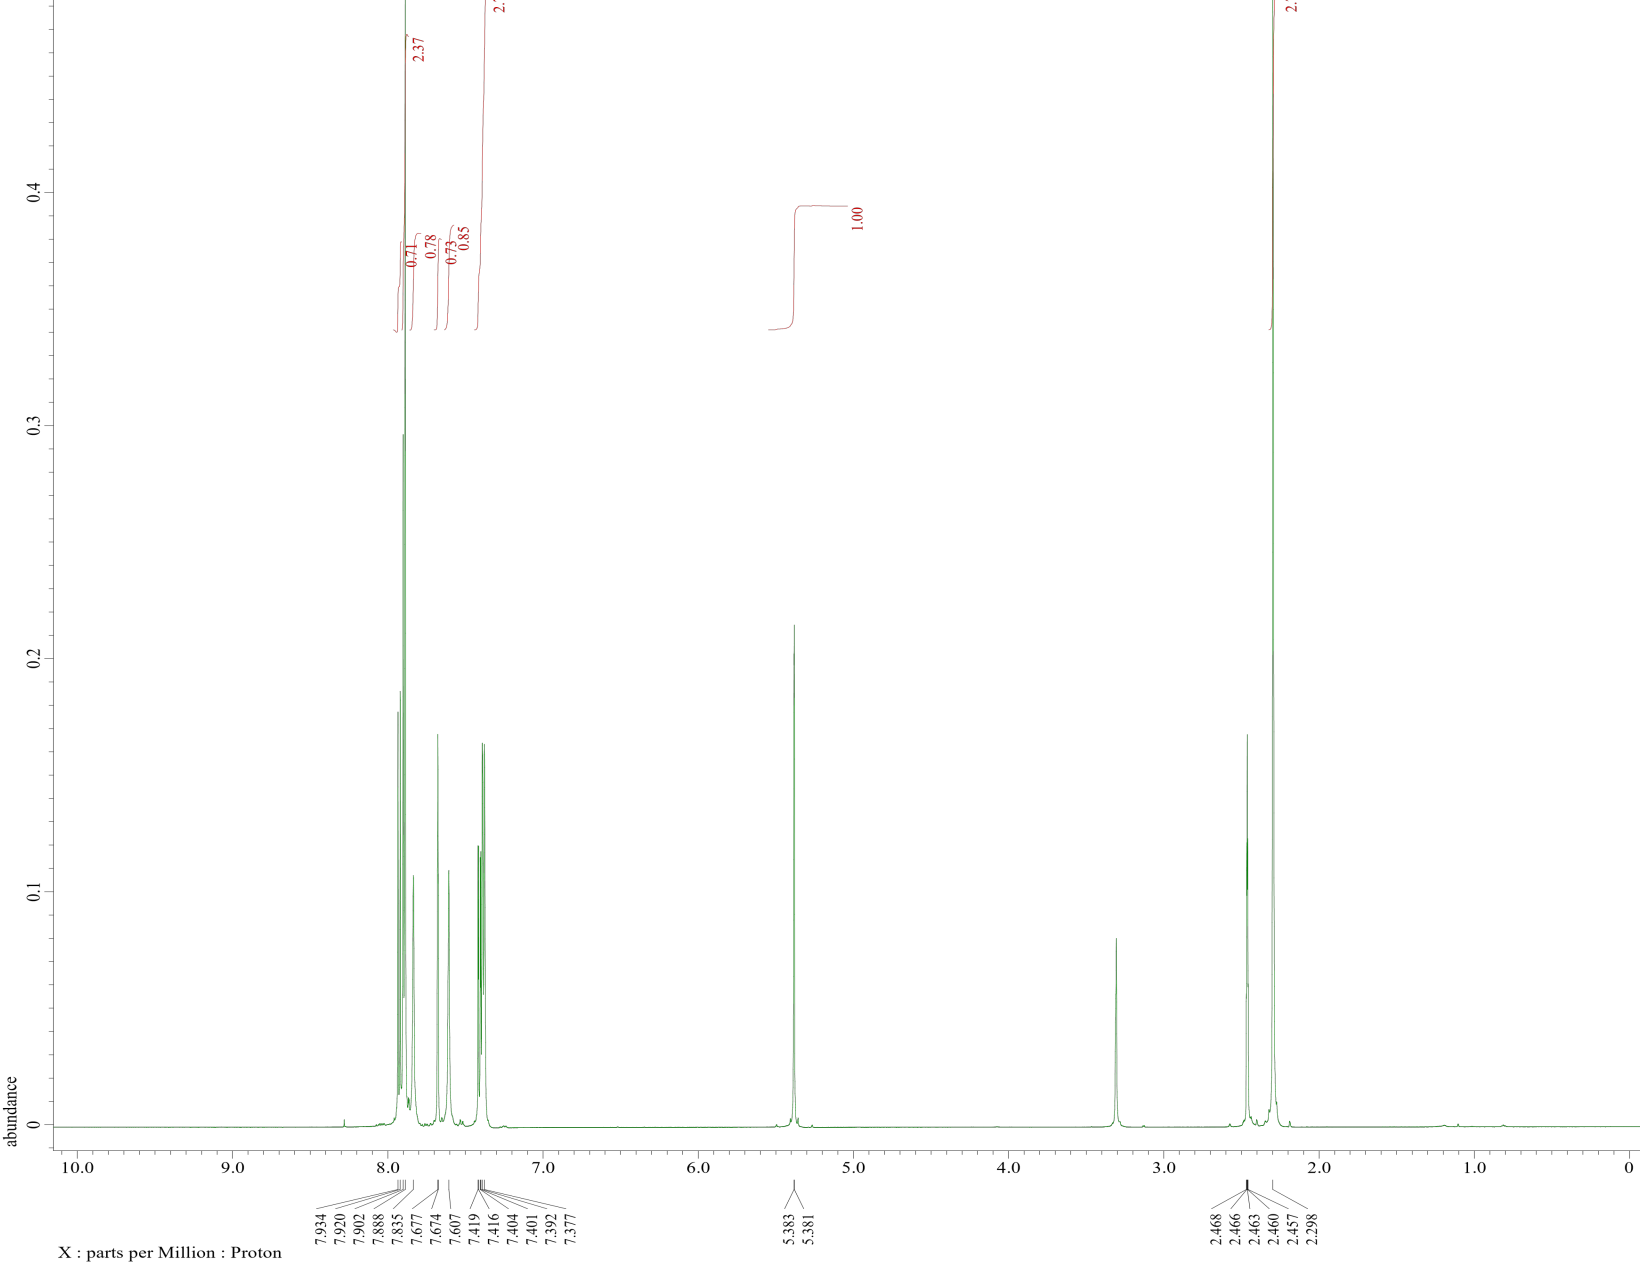

```

Filename      = TA02082-R1-5Cl_proton
Author       = delta
Experiment   = proton.jxp
Sample_Id    = TA02082-R1-5Cl
Solvent      = DMSO-D6
Actual_Start_Time = 7-NOV-2020 16:00:41
Revision_Time   = 7-NOV-2020 16:17:58

Comment      = single_pulse-5Cl-5H
Data Format   = 1D_COMPLEX
Dim Size     = 26214
X_Domain     = Proton
Dim Title    = Proton
Dim Units    = [ppm]
Dimensions   = X
Spectrometer = JNM-ECP600R/S3

Field Strength = 14.09636928[T] (600[M]
X_Acq_Duration = 2.90455552[s]
X_Domain       = Proton
X_Freq         = 600.1723046[MHz]
X_Offset       = 5[ppm]
X_Points       = 32768
X_Prescans     = 1
X_Resolution   = 0.34428676[Hz]
X_Sweep        = 11.28158845[kHz]
X_Sweep_Clipped = 9.02527076[kHz]
Irr_Domain     = Proton
Irr_Freq       = 600.1723046[MHz]
Irr_Offset     = 5[ppm]
Tri_Domain     = Proton
Tri_Freq       = 600.1723046[MHz]
Tri_Offset     = 5[ppm]
Blanking       = 5[us]
Clipped        = FALSE
Scans          = 16
Total_Scans    = 16

Relaxation_Delay = 1[s]
Recvr Gain       = 36
Temp_Get         = 20.3[dC]
X_90_Width       = 9.5[us]
X_Acq_Time       = 2.90455552[s]
X_Angle          = 45[deg]
X_Atn            = 8.1[dB]
X_Pulse          = 4.75[us]
Irr_Mode         = Off
Tri_Mode         = Off
Dante_Loop       = 100
Dante_Presat     = FALSE
Decimation_Rate = 0
Experiment_Path  = c:\Program Files\JEOL
Initial_Wait     = 1[s]
Phase            = {0, 90, 270, 180, 180}
Presat_Time      = 1[s]
Presat_Time_Flag = FALSE
Relaxation_Delay_Calc = 0[s]
Relaxation_Delay_Temp = 1[s]
Repetition_Time = 3.90455552[s]
    
```

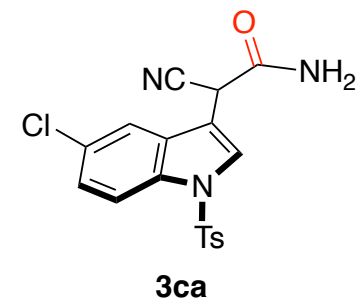

TA02082-R1-5Cl1\_carbon-1-3.jdf

(thousandths)

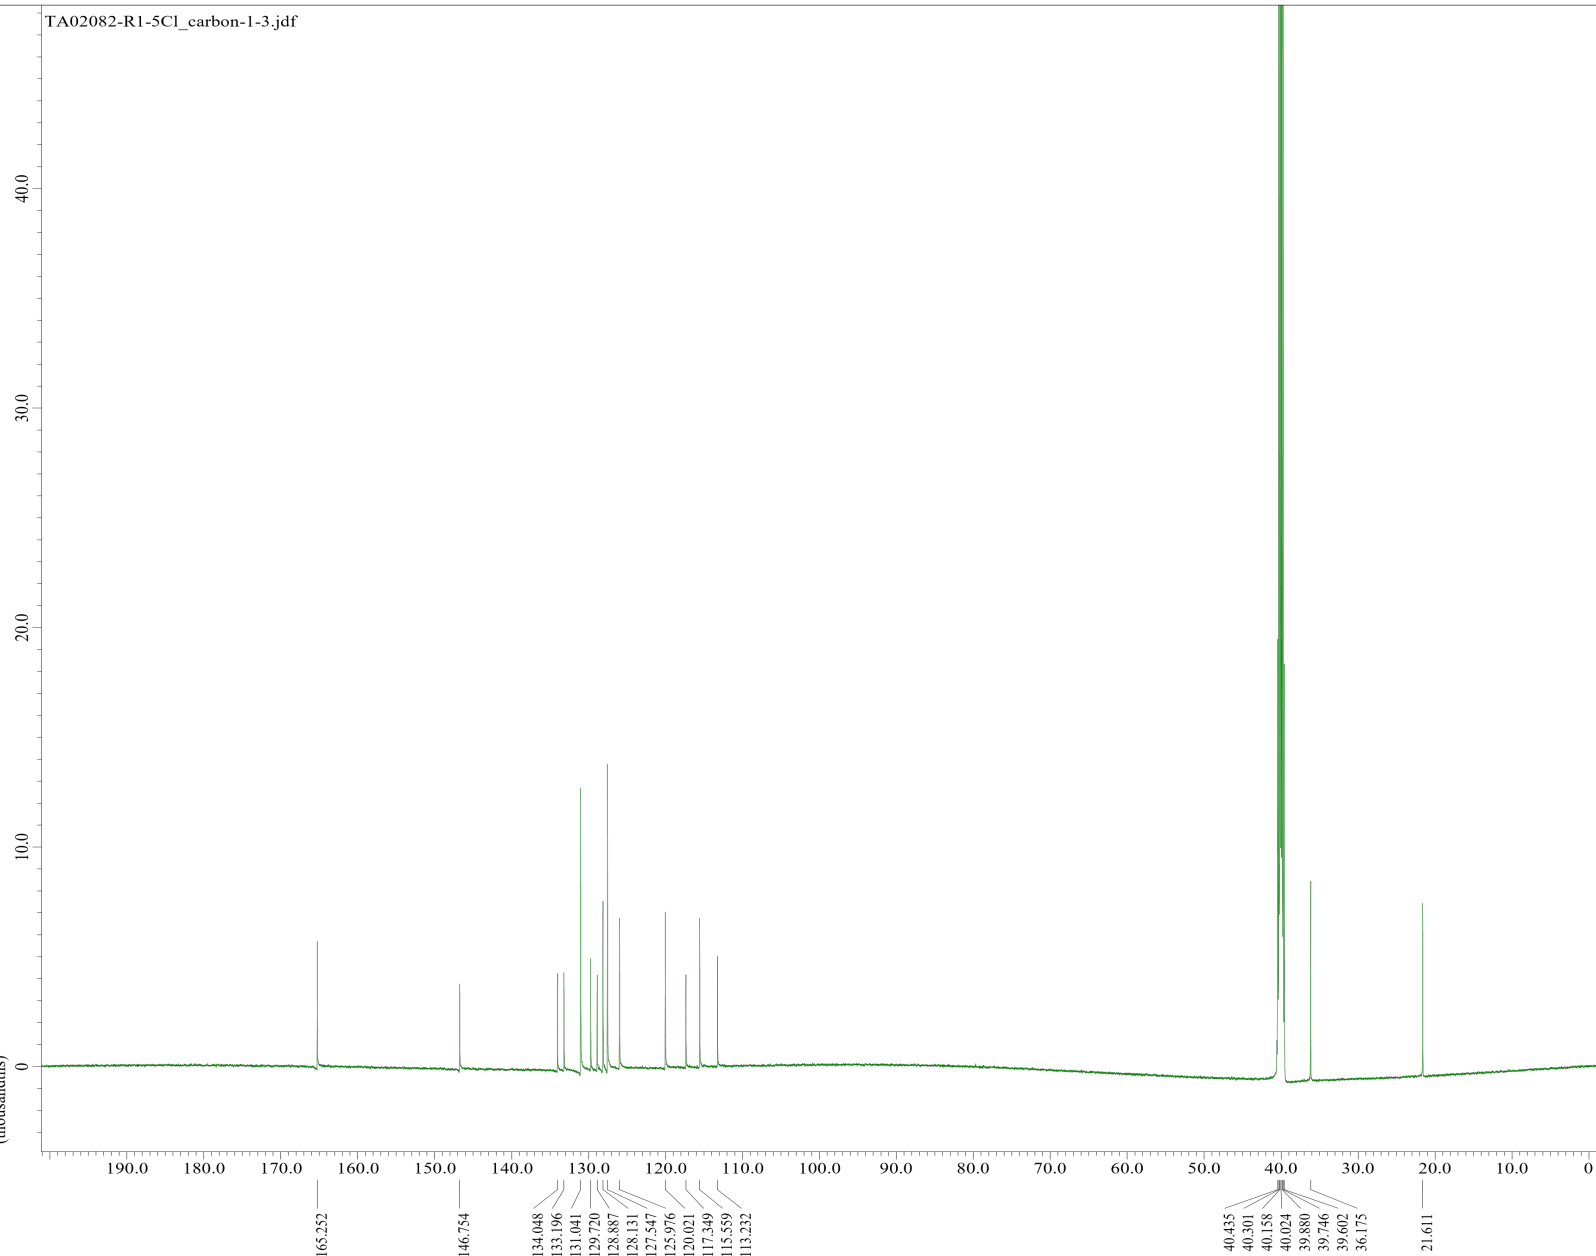

X : parts per Million : Carbon13

```

Filename      = TA02082-R1-5Cl1_car
Author       = delta
Experiment   = carbon_jmp
Sample_id    = TA02082-R1-5Cl1
Solvent      = DMSO-D6
Actual_Start_Time = 7-NOV-2020 16:09:
Revision_Time = 7-NOV-2020 18:33:

Comment      = single pulse decou
Data_Format  = 1D COMPLEX
Dim_Size     = 26214
X_Domain     = Carbon13
Dim_Title    = Carbon13
Dim_Units    = [ppm]
Dimensions   = X
Spectrometer = JNM-ECZ600R/S3

Field_Strength = 14.09636928[T] (60
X_Acq_Duration = 0.69206016[s]
X_Domain       = Carbon13
X_Freq         = 150.91343039[MHz]
X_Offset       = 100[ppm]
X_Points       = 32768
X_Prescans     = 4
X_Resolution   = 1.44496109[Hz]
X_Sweep        = 47.34848485[kHz]
X_Sweep_Clipped = 37.87878788[kHz]
Irr_Domain     = Proton
Irr_Freq       = 600.1723046[MHz]
Irr_Offset     = 5[ppm]
Blanking       = 15[us]
Clipped        = TRUE
Scans          = 4213
Total_scans    = 4213

Relaxation_Delay = 1[s]
Recvr_Gain       = 56
Temp_Get         = 19.7[dc]
X_90_Width      = 8.8[us]
X_Acq_Time      = 0.69206016[s]
X_Angle         = 30[deg]
X_Atn           = 11[db]
X_Pulse         = 2.93333333[us]
Irr_Atn_Dec     = 26.162[db]
Irr_Atn_Dec_Calc = 26.162[db]
Irr_Atn_Dec_Default_Calc = 26.162[db]
Irr_Atn_Noise  = 26.162[db]
Irr_Dec_Bandwidth_Hz = 7.23684211[kHz]
Irr_Dec_Bandwidth_Fpm = 12.05794078[ppm]
Irr_Dec_Freq    = 600.1723046[MHz]
Irr_Dec_Merit_Factor = 2.2
Irr_Decoupling = TRUE
Irr_Noise       = WALTZ
Irr_Offset_Default = 5[ppm]
Irr_Pwidth      = 76[us]
Irr_Pwidth_Default = 76[us]
Irr_Pwidth_Default_Calc = 76[us]
Irr_Pwidth_Temp1 = 76[us]
Irr_Wurst       = FALSE
Decimation_Rate = 0
Experiment_Path = c:\Program Files\J
Initial_Wait    = 1[s]
Noe_Time        = 1[s]
Noe_Time_Flag   = FALSE
Relaxation_Delay_Calc = 0[s]
Relaxation_Delay_Temp = 1[s]
Repetition_Time = 1.69206016[s]
    
```

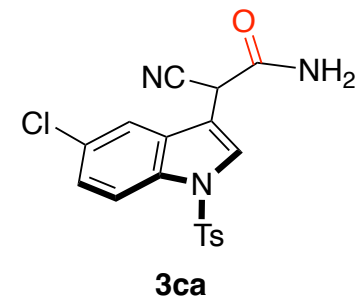

TA02080-5Br\_proton-1-3.jdf

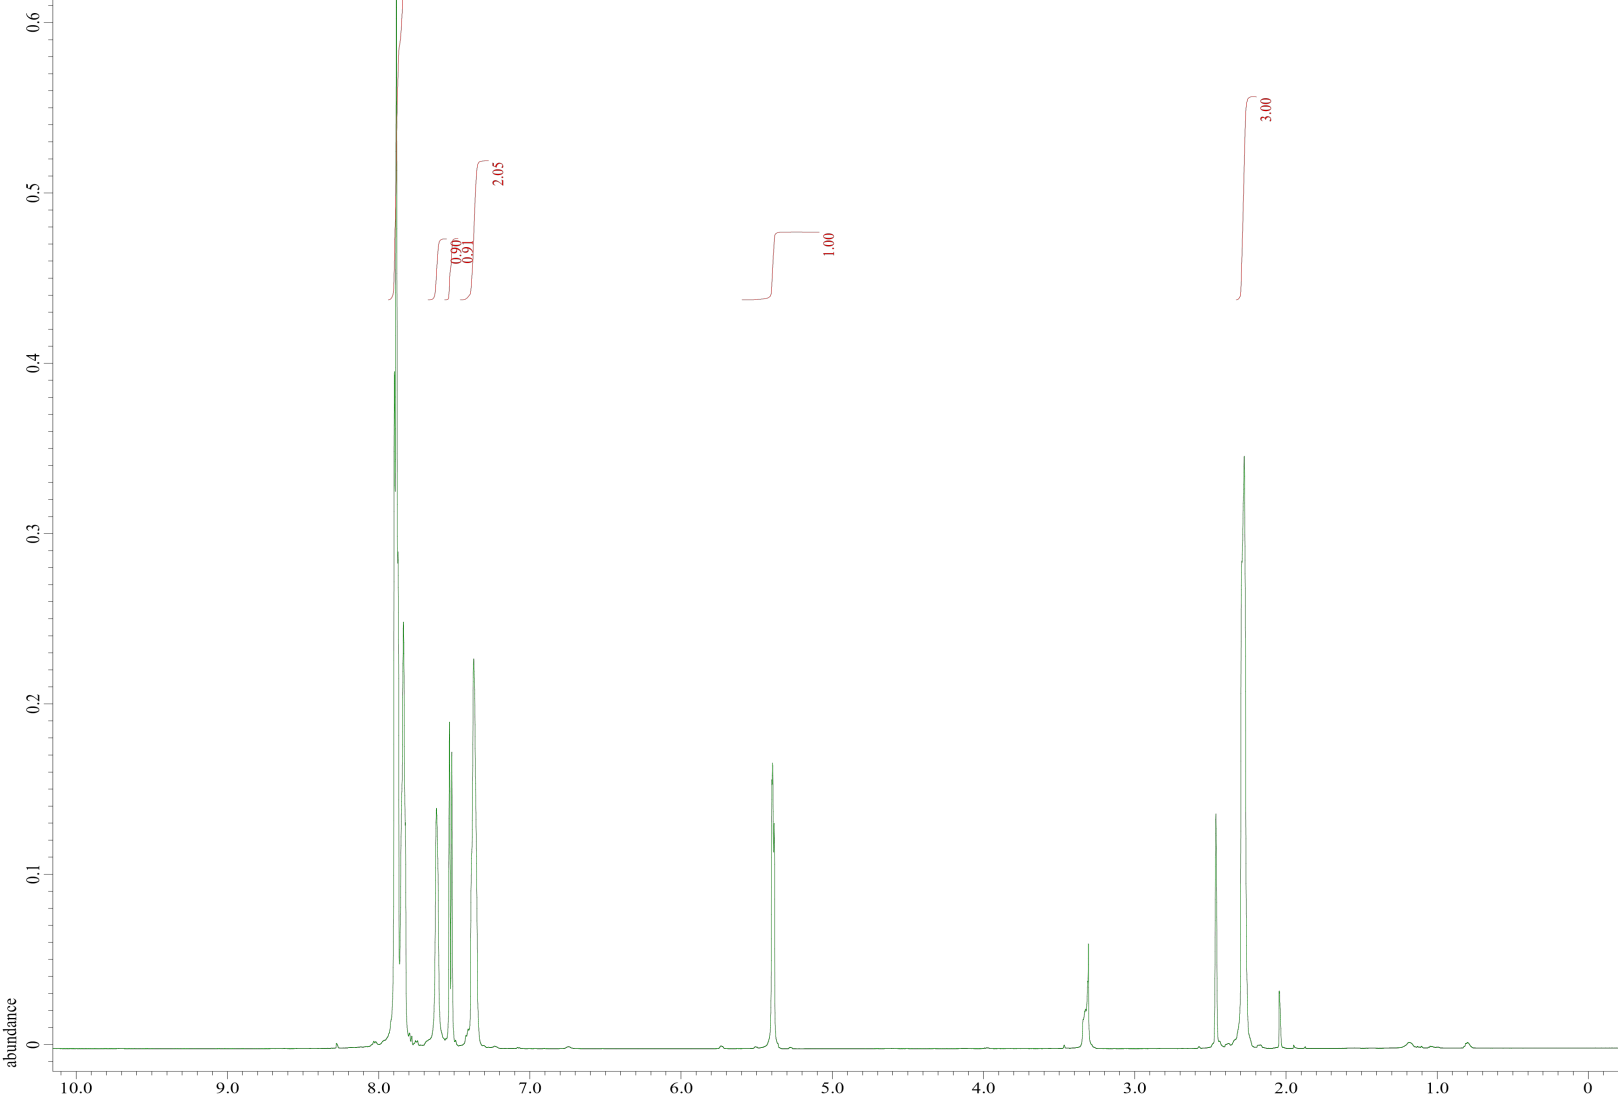

7.895  
7.883  
7.872  
7.837  
7.823  
7.618  
7.532  
7.517  
7.371

5.399  
5.395  
5.385

2.463  
2.292  
2.276

X : parts per Million : Proton

```

Filename      = TA02080-5Br_proton-1-
Author       = delta
Experiment   = proton_jxp
Sample_Id    = TA02080-5Br
Solvent      = DMSO-D6
Actual_Start_Time = 7-NOV-2020 16:04:50
Revision_Time   = 7-NOV-2020 16:14:59

Comment      = single_pulse-5Br-5H
Data_Format  = 1D_COMPLEX
Dim_Size     = 26214
X_Domain     = Proton
Dim_Title    = Proton
Dim_Units    = [ppm]
Dimensions   = X
Spectrometer = JNM-ECZ600R/S3

Field_Strength = 14.09636928[T] (600[M
X_Acq_Duration = 2.90455552[s]
X_Domain       = Proton
X_Freq         = 600.1723046[MHz]
X_Offset       = 5[ppm]
X_Points       = 32768
X_Prescans     = 1
X_Resolution   = 0.34428676[Hz]
X_Sweep        = 11.28158845[kHz]
X_Sweep_Clipped = 9.02527076[kHz]
IRF_Domain     = Proton
IRF_Freq       = 600.1723046[MHz]
IRF_Offset     = 5[ppm]
Tri_Domain     = Proton
Tri_Freq       = 600.1723046[MHz]
Tri_Offset     = 5[ppm]
Blanking       = 5[us]
Clipped        = FALSE
Scans          = 16
Total_Scans    = 16

Relaxation_Delay = 1[s]
Recvr_Gain       = 36
Temp_Get         = 20.8[dc]
X_90_Width      = 9.5[us]
X_Acq_Time      = 2.90455552[s]
X_Angle         = 45[deg]
X_Atn           = 8.1[dB]
X_Pulse         = 4.75[us]
IRF_Mode        = Off
Tri_Mode        = Off
Dante_Loop      = 100
Dante_Preset    = FALSE
Declination_Rate = 0
Experiment_Path  = c:\Program Files\JEOL
Initial_Wait    = 1[s]
Phase           = {0, 90, 270, 180, 180
Preset_Time     = 1[s]
Preset_Time_Flag = FALSE
Relaxation_Delay_Calc = 0[s]
Relaxation_Delay_Temp = 1[s]
Repetition_Time = 3.90455552[s]
    
```

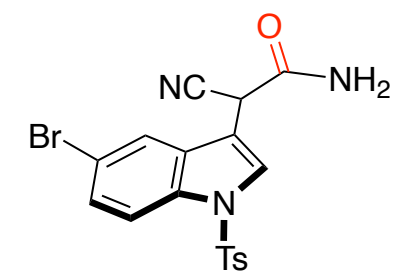

**3da**



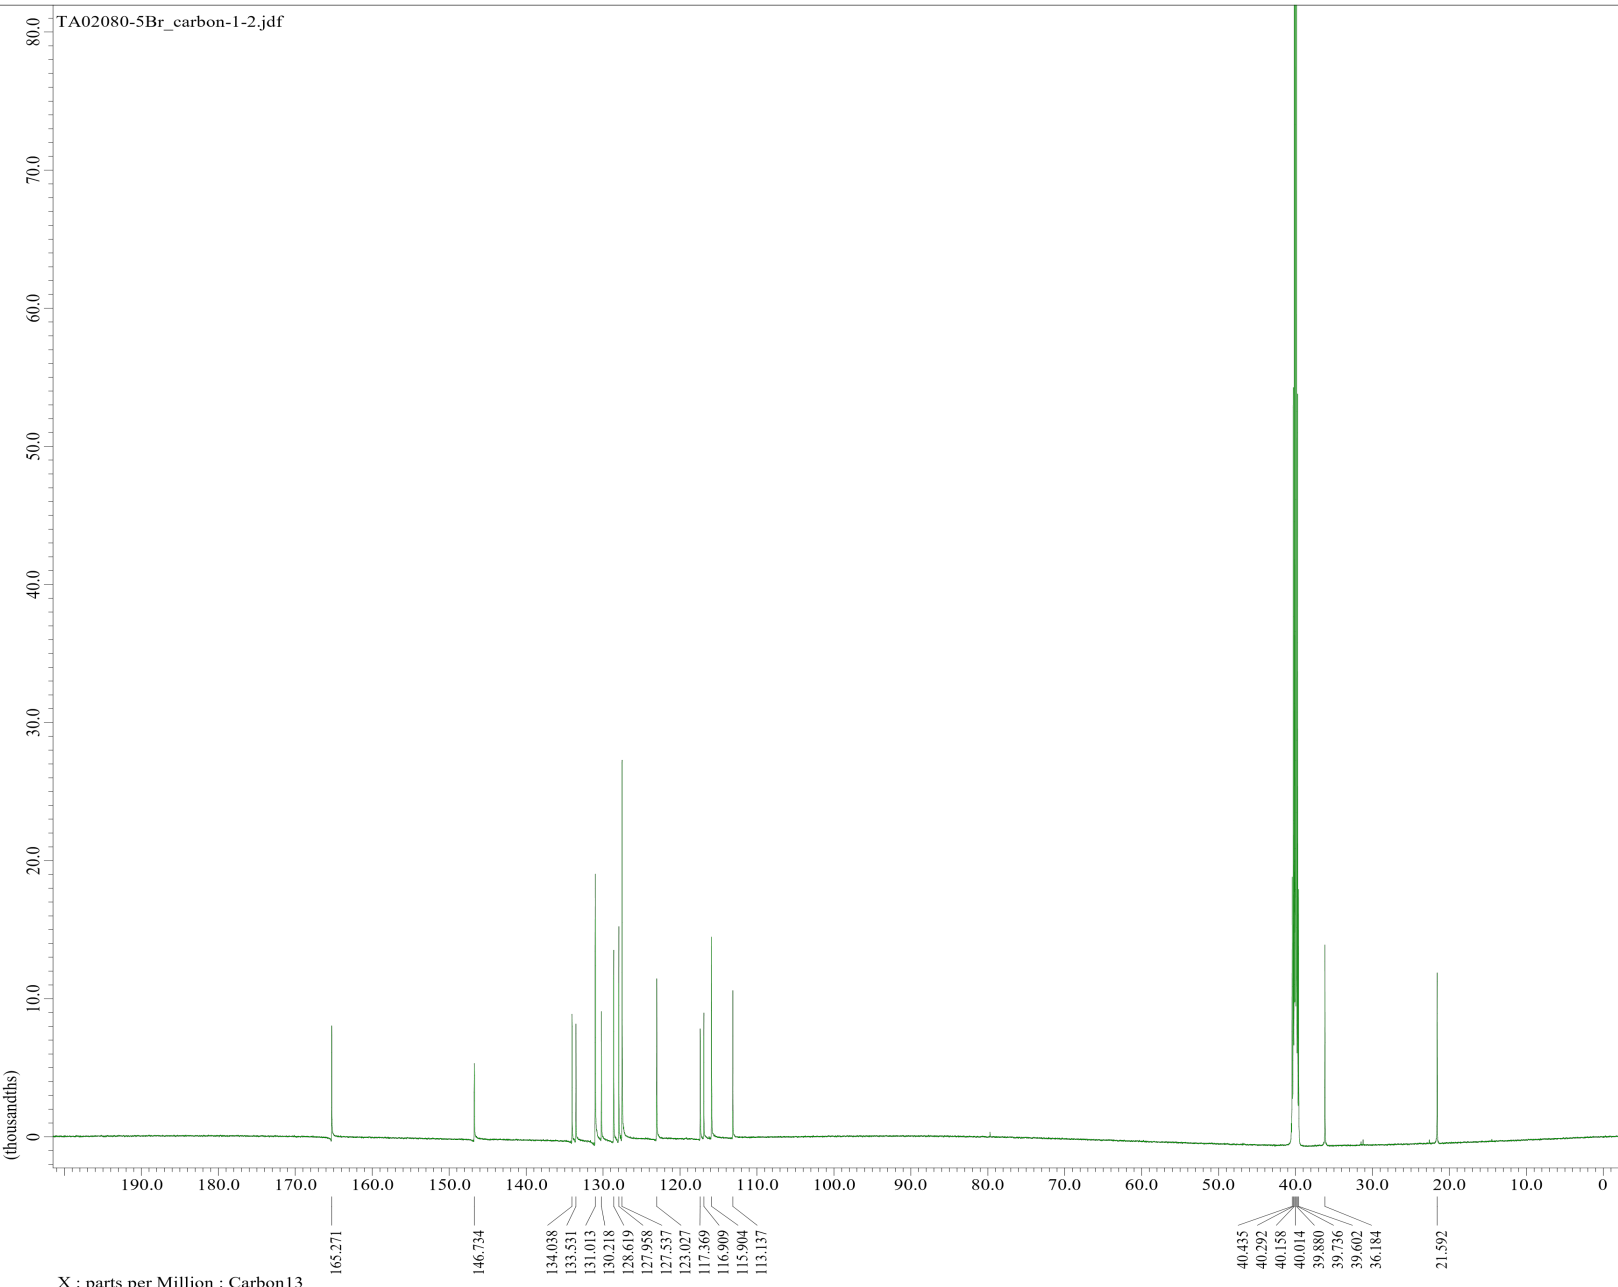

```

Filename      = TA02080-5Br_carbon
Author       = delta
Experiment   = carbon_jxp
Sample_Id    = TA02080-5Br
Solvent      = DMSO-D6
Actual_Start_Time = 7-NOV-2020 18:34:
Revision_Time = 8-NOV-2020 09:21:

Comment      = single pulse decou
Data_Format  = 1D COMPLEX
Dim_Size     = 26214
X_Domain     = Carbon13
Dim_Title    = Carbon13
Dim_Units    = [ppm]
Dimensions   = X
Spectrometer = JNM-EC2600R/S3

Field_Strength = 14.09636928[T] (60
X_Acq_Duration = 0.69206016[s]
X_Domain       = Carbon13
X_Freq         = 150.91343039[MHz]
X_Offset       = 100 [ppm]
X_Points       = 32768
X_Prescans     = 4
X_Resolution   = 1.44496109[Hz]
X_Sweep        = 47.34848485[kHz]
X_Sweep_Clipped = 37.87878788[kHz]
Irr_Domain     = Proton
Irr_Freq       = 600.1723046[MHz]
Irr_Offset     = 5 [ppm]
Blanking       = 15 [us]
Clipped        = TRUE
Scans          = 7000
Total_Scans    = 7000

Relaxation_Delay = 1 [s]
Recvr_Gain       = 56
Temp_Get         = 19.8 [dC]
X_90_Width      = 8.8 [us]
X_Acq_Time      = 0.69206016[s]
X_Angle         = 30 [deg]
X_Atn           = 11 [dB]
X_Pulse         = 2.93333333[us]
Irr_Atn_Dec     = 26.162 [dB]
Irr_Atn_Dec_Calc = 26.162 [dB]
Irr_Atn_Dec_Default_Calc = 26.162 [dB]
Irr_Atn_Noise   = 26.162 [dB]
Irr_Dec_Bandwidth_Hz = 7.23684211[kHz]
Irr_Dec_Bandwidth_Fpm = 12.05794078 [ppm]
Irr_Dec_Freq    = 600.1723046[MHz]
Irr_Dec_Merit_Factor = 2.2
Irr_Decoupling = TRUE
Irr_Noise       = WALTZ
Irr_Offset_Default = 5 [ppm]
Irr_Pwidth      = 76 [us]
Irr_Pwidth_Default = 76 [us]
Irr_Pwidth_Default_Calc = 76 [us]
Irr_Pwidth_Temp1 = 76 [us]
Irr_Wurst       = FALSE
Decimation_Rate = 0
Experiment_Path = c:\Program Files\J
Initial_Wait     = 1 [s]
Noe_Time         = 1 [s]
Noe_Time_Flag    = FALSE
Relaxation_Delay_Calc = 0 [s]
Relaxation_Delay_Temp = 1 [s]
Repetition_Time = 1.69206016[s]

```

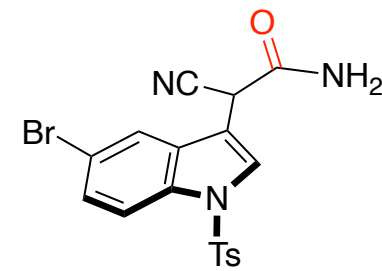

3da

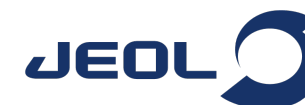

Filename = TA03002-Re\_proton-1-2  
Author = delta  
Experiment = proton.jxp  
Sample\_Id = TA03002-Re  
Solvent = CHLOROFORM-D  
Actual\_Start\_Time = 6-JAN-2021 05:32:21  
Revision\_Time = 6-JAN-2021 08:14:08

Comment = single\_pulse-5F-indol  
Data\_Format = 1D\_COMPLEX  
Dim\_Size = 13107  
X\_Domain = Proton  
Dim\_Title = Proton  
Dim\_Units = [ppm]  
Dimensions = X  
Spectrometer = JNM-ECZ600R/S3

Field\_Strength = 14.09636928 [T] (600 [M])  
X\_Acq\_Duration = 1.4548992 [s]  
X\_Domain = Proton  
X\_Freq = 600.1723046 [MHz]  
X\_Offset = 5 [ppm]  
X\_Points = 16384  
X\_Prescans = 1  
X\_Resolution = 0.68733284 [Hz]  
X\_Sweep = 11.26126126 [kHz]  
X\_Sweep\_Clipped = 9.00900901 [kHz]  
Irr\_Domain = Proton  
Irr\_Freq = 600.1723046 [MHz]  
Irr\_Offset = 5 [ppm]  
Tri\_Domain = Proton  
Tri\_Freq = 600.1723046 [MHz]  
Tri\_Offset = 5 [ppm]  
Blanking = 5 [us]  
Clipped = TRUE  
Scans = 16  
Total\_Scans = 16

Relaxation\_Delay = 5 [s]  
Recvr\_Gain = 56  
Temp\_Get = 19.7 [dc]  
X\_90\_Width = 9.5 [us]  
X\_Acq\_Time = 1.4548992 [s]  
X\_Angle = 45 [deg]  
X\_Atn = 8.1 [dB]  
X\_Pulse = 4.75 [us]  
Irr\_Mode = Off  
Tri\_Mode = Off  
Dante\_Loop = 500  
Dante\_Presat = FALSE  
Decimation\_Rate = 0  
Experiment\_Path = c:\Program Files\JEOL  
Initial\_Wait = 1 [s]  
Phase = {0, 90, 270, 180, 180  
Presat\_Time = 5 [s]  
Presat\_Time\_Flag = FALSE  
Relaxation\_Delay\_Calc = 0 [s]  
Relaxation\_Delay\_Temp = 5 [s]  
Repetition\_Time = 6.4548992 [s]

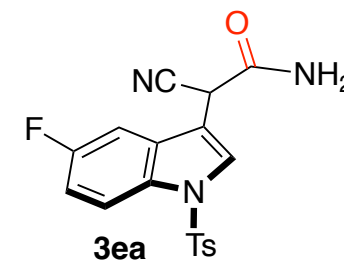

TA03002-Re\_proton-1-2.jdf

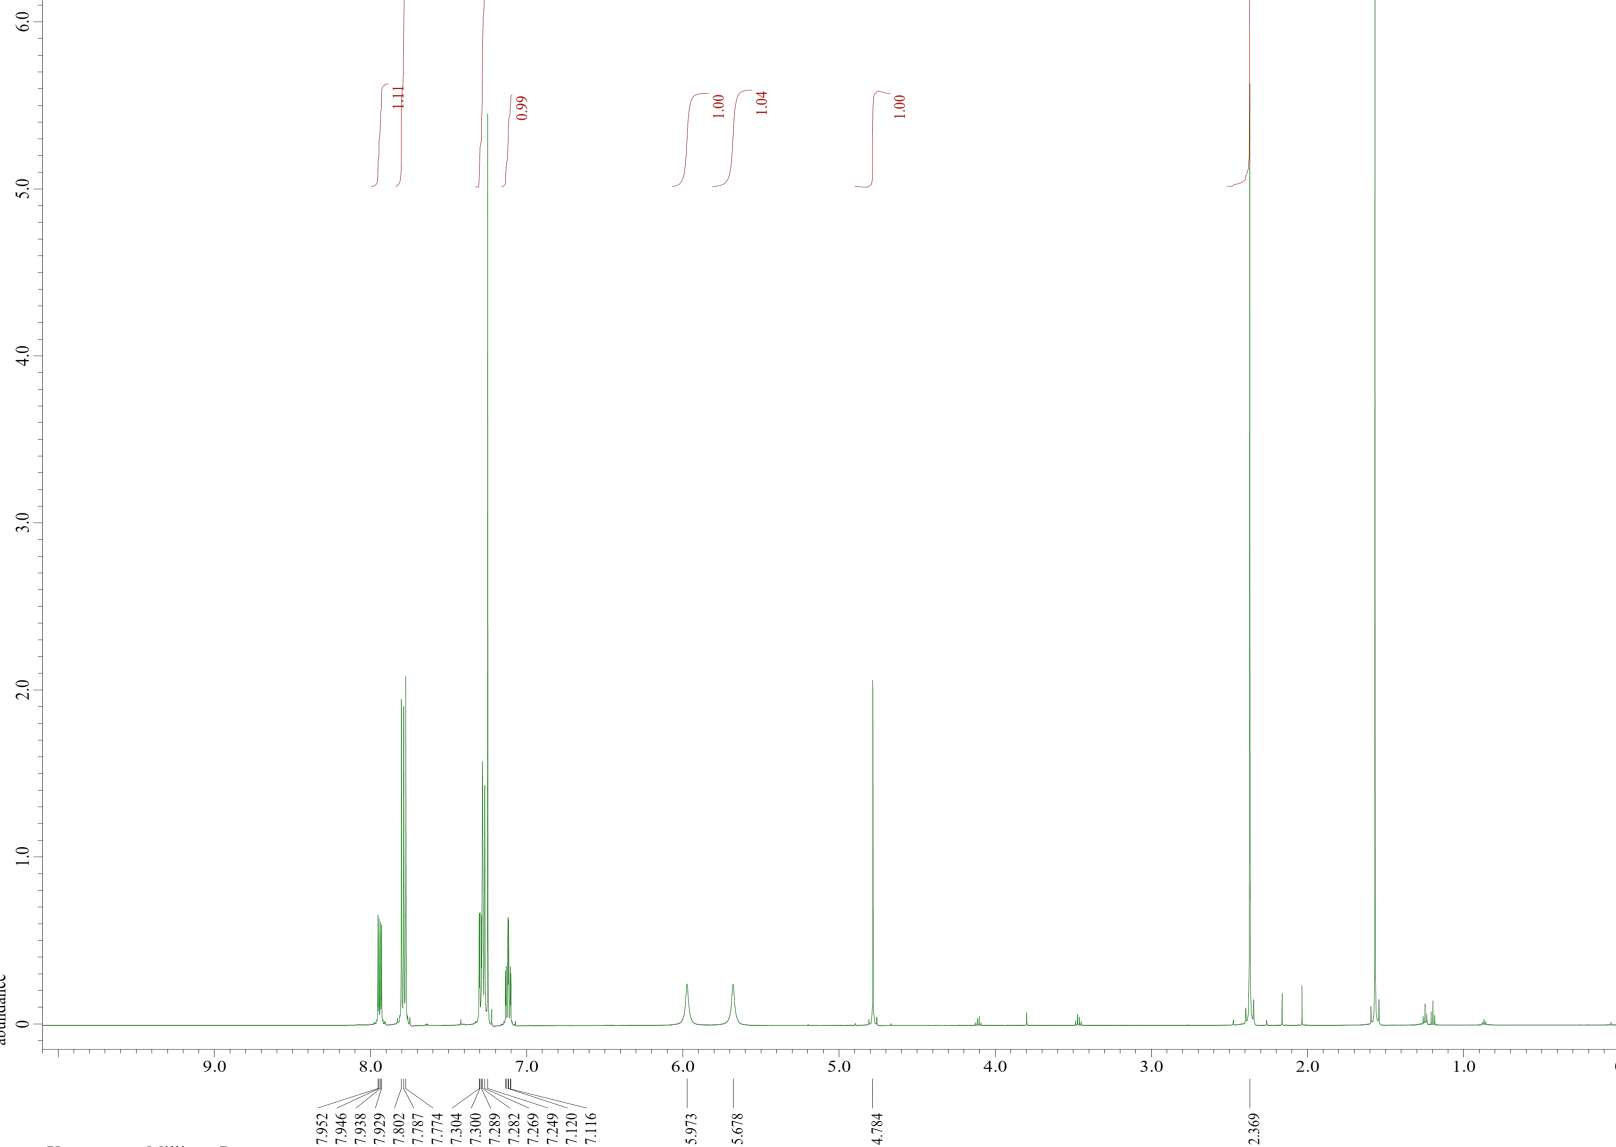

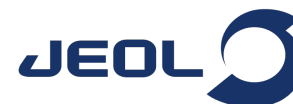

Filename = TA03002-Re\_carbon-  
Author = delta  
Experiment = carbon.jxp  
Sample\_Id = TA03002-Re  
Solvent = CHLOROFORM-D  
Actual\_Start\_Time = 6-JAN-2021 05:37:  
Revision\_Time = 6-JAN-2021 08:14:  
Comment = single pulse decou  
Data\_Format = 1D\_COMPLEX  
Dim\_Size = 26214  
X\_Domain = Carbon13  
Dim\_Title = Carbon13  
Dim\_Units = [ppm]  
Dimensions = X  
Spectrometer = JNM-ECZ600R/S3  
Field\_Strength = 14.09636928[T] (60  
X\_Acq\_Duration = 0.69206016[s]  
X\_Domain = Carbon13  
X\_Freq = 150.91343039[MHz]  
X\_Offset = 100[ppm]  
X\_Points = 32768  
X\_Prescans = 4  
X\_Resolution = 1.44496109[Hz]  
X\_Sweep = 47.34848485[kHz]  
X\_Sweep\_Clipped = 37.87878788[kHz]  
Irr\_Domain = Proton  
Irr\_Freq = 600.1723046[MHz]  
Irr\_Offset = 5[ppm]  
Blanking = 15[us]  
Clipped = FALSE  
Scans = 4785  
Total\_Scans = 4785  
Relaxation\_Delay = 1[s]  
Recvr\_Gain = 36  
Temp\_Get = 19.8[dc]  
X\_90\_Width = 8.8[us]  
X\_Acq\_Time = 0.69206016[s]  
X\_Angle = 30[deg]  
X\_Atn = 11[db]  
X\_Pulse = 2.93333333[us]  
Irr\_Atn\_Dec = 26.162[db]  
Irr\_Atn\_Dec\_Calc = 26.162[db]  
Irr\_Atn\_Dec\_Default\_Calc = 26.162[db]  
Irr\_Atn\_No = 26.162[db]  
Irr\_Dec\_Bandwidth\_Hz = 7.23684211[kHz]  
Irr\_Dec\_Bandwidth\_Ppm = 12.05794078[ppm]  
Irr\_Dec\_Freq = 600.1723046[MHz]  
Irr\_Dec\_Merit\_Factor = 2.2  
Irr\_Decoupling = TRUE  
Irr\_No = TRUE  
Irr\_Noise = WALTZ  
Irr\_Offset\_Default = 5[ppm]  
Irr\_Pwidth = 76[us]  
Irr\_Pwidth\_Default = 76[us]  
Irr\_Pwidth\_Default\_Calc = 76[us]  
Irr\_Pwidth\_Templ = 76[us]  
Irr\_Wurst = FALSE  
Decimation\_Rate = 0  
Experiment\_Path = c:\Program Files\J  
Initial\_Wait = 1[s]  
Noe\_Time = 1[s]  
Noe\_Time\_Flag = FALSE  
Relaxation\_Delay\_Calc = 1[s]  
Relaxation\_Delay\_Temp = 1[s]  
Repetition\_Time = 1.69206016[s]

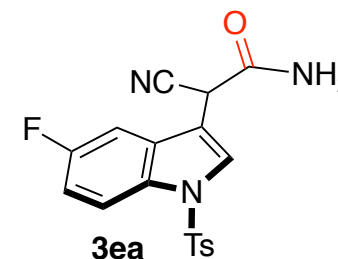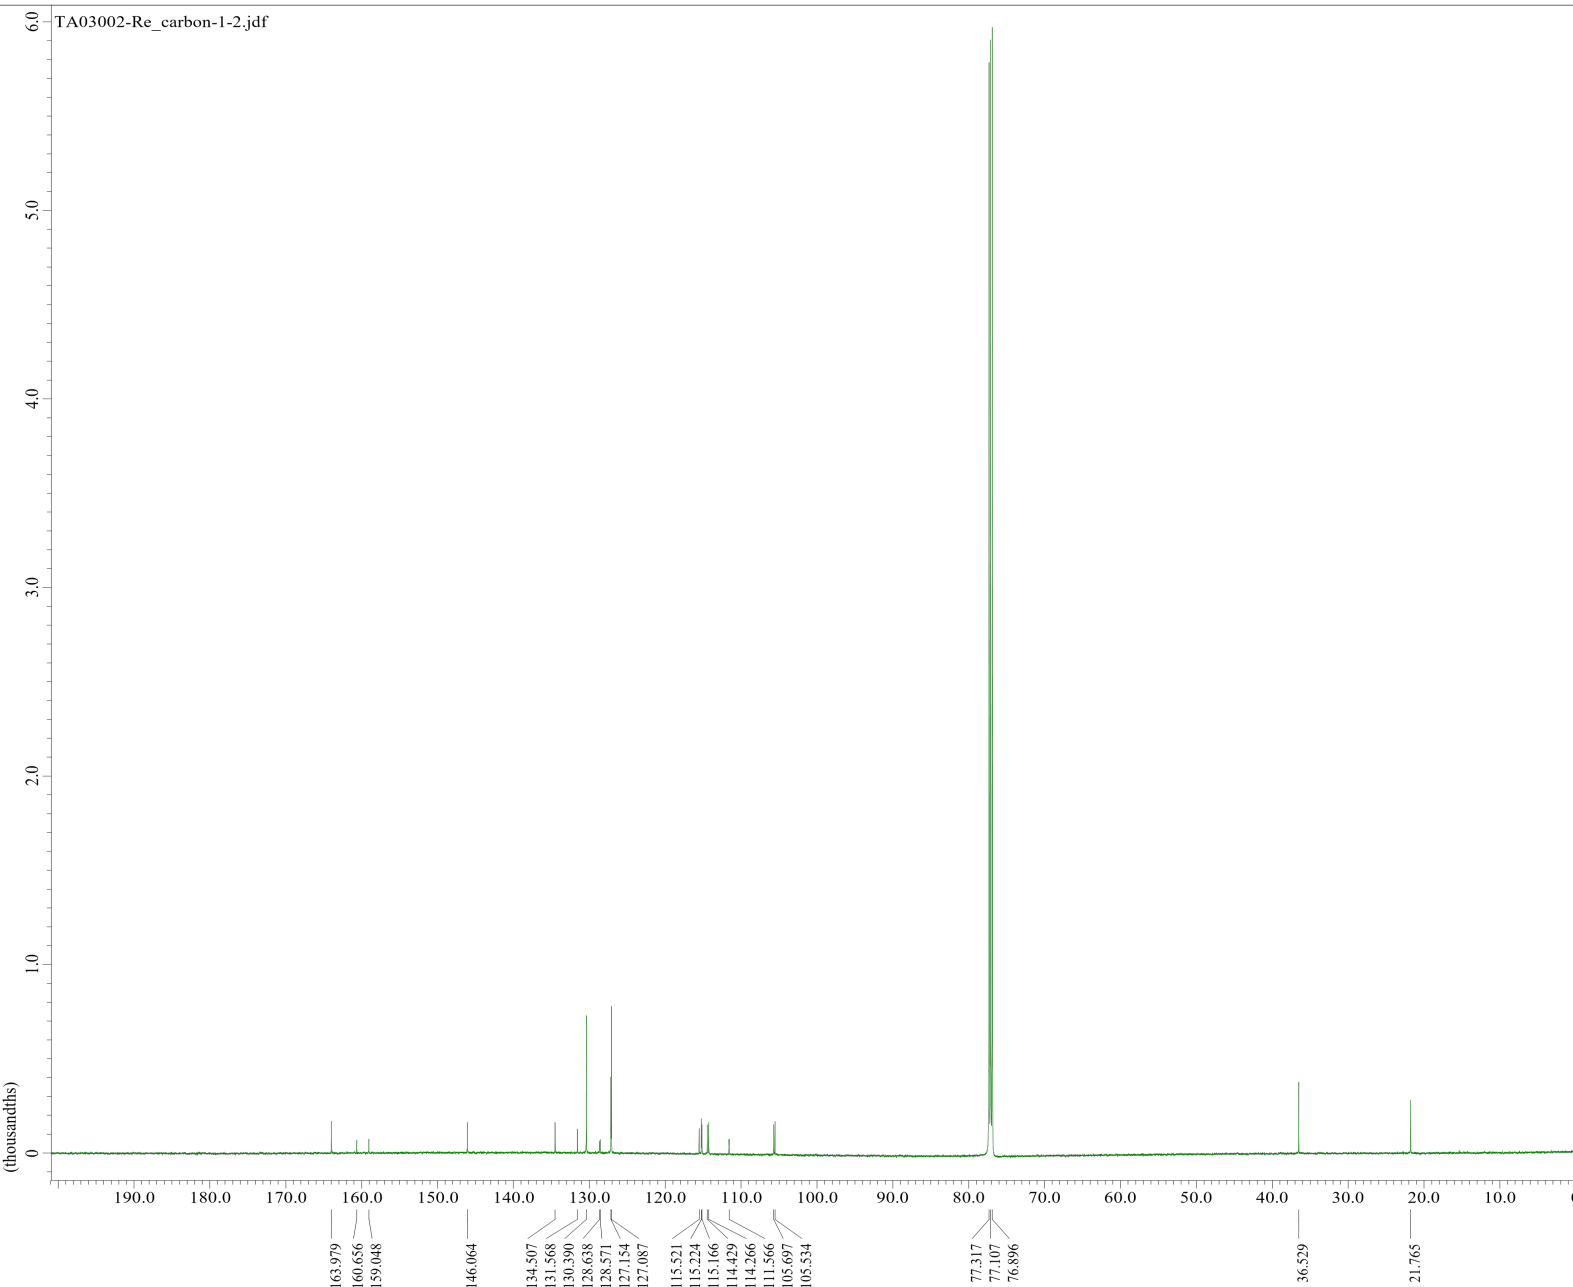

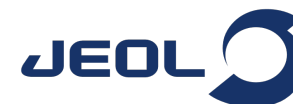

Filename = TA03001-1\_proton-1-3.  
Author = delta  
Experiment = proton.jxp  
Sample\_Id = TA03001-1  
Solvent = DMSO-d6  
Actual\_Start\_Time = 22-DEC-2020 20:21:57  
Revision\_Time = 22-DEC-2020 20:29:50

Comment = single\_pulse-4F-indol  
Data\_Format = 1D COMPLEX  
Dim\_Size = 13107  
X\_Domain = Proton  
Dim\_Title = Proton  
Dim\_Units = [ppm]  
Dimensions = X  
Spectrometer = JNM-EC2600R/S3

Field\_Strength = 14.09636928[T] (600[M]  
X\_Acq\_Duration = 1.09051904[s]  
X\_Domain = Proton  
X\_Freq = 600.1723046[MHz]  
X\_Offset = 5[ppm]  
X\_Points = 16384  
X\_Prescans = 1  
X\_Resolution = 0.91699454[Hz]  
X\_Sweep = 15.02403846[kHz]  
X\_Sweep\_Clippped = 12.01923077[kHz]  
Irr\_Domain = Proton  
Irr\_Freq = 600.1723046[MHz]  
Irr\_Offset = 5[ppm]  
Tri\_Domain = Proton  
Tri\_Freq = 600.1723046[MHz]  
Tri\_Offset = 5[ppm]  
Blanking = 5[us]  
Clipped = FALSE  
Scans = 16  
Total\_Scans = 16

Relaxation\_Delay = 5[s]  
Recvr\_Gain = 36  
Temp\_Get = 19.6[dC]  
X\_90\_Width = 9.5[us]  
X\_Acq\_Time = 1.09051904[s]  
X\_Angle = 45[deg]  
X\_Atn = 8.1[dB]  
X\_Pulse = 4.75[us]  
Irr\_Mode = Off  
Tri\_Mode = Off  
Dante\_Loop = 500  
Dante\_Preset = FALSE  
Decimation\_Rate = 0  
Experiment\_Path = c:\Program Files\JEOL  
Initial\_Wait = 1[s]  
Phase = (0, 90, 270, 180, 180  
Preset\_Time = 5[s]  
Preset\_Time\_Flag = FALSE  
Relaxation\_Delay\_Calc = 0[s]  
Relaxation\_Delay\_Temp = 5[s]  
Repetition\_Time = 6.09051904[s]

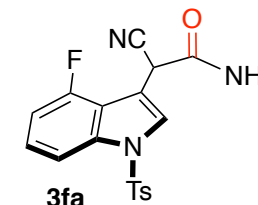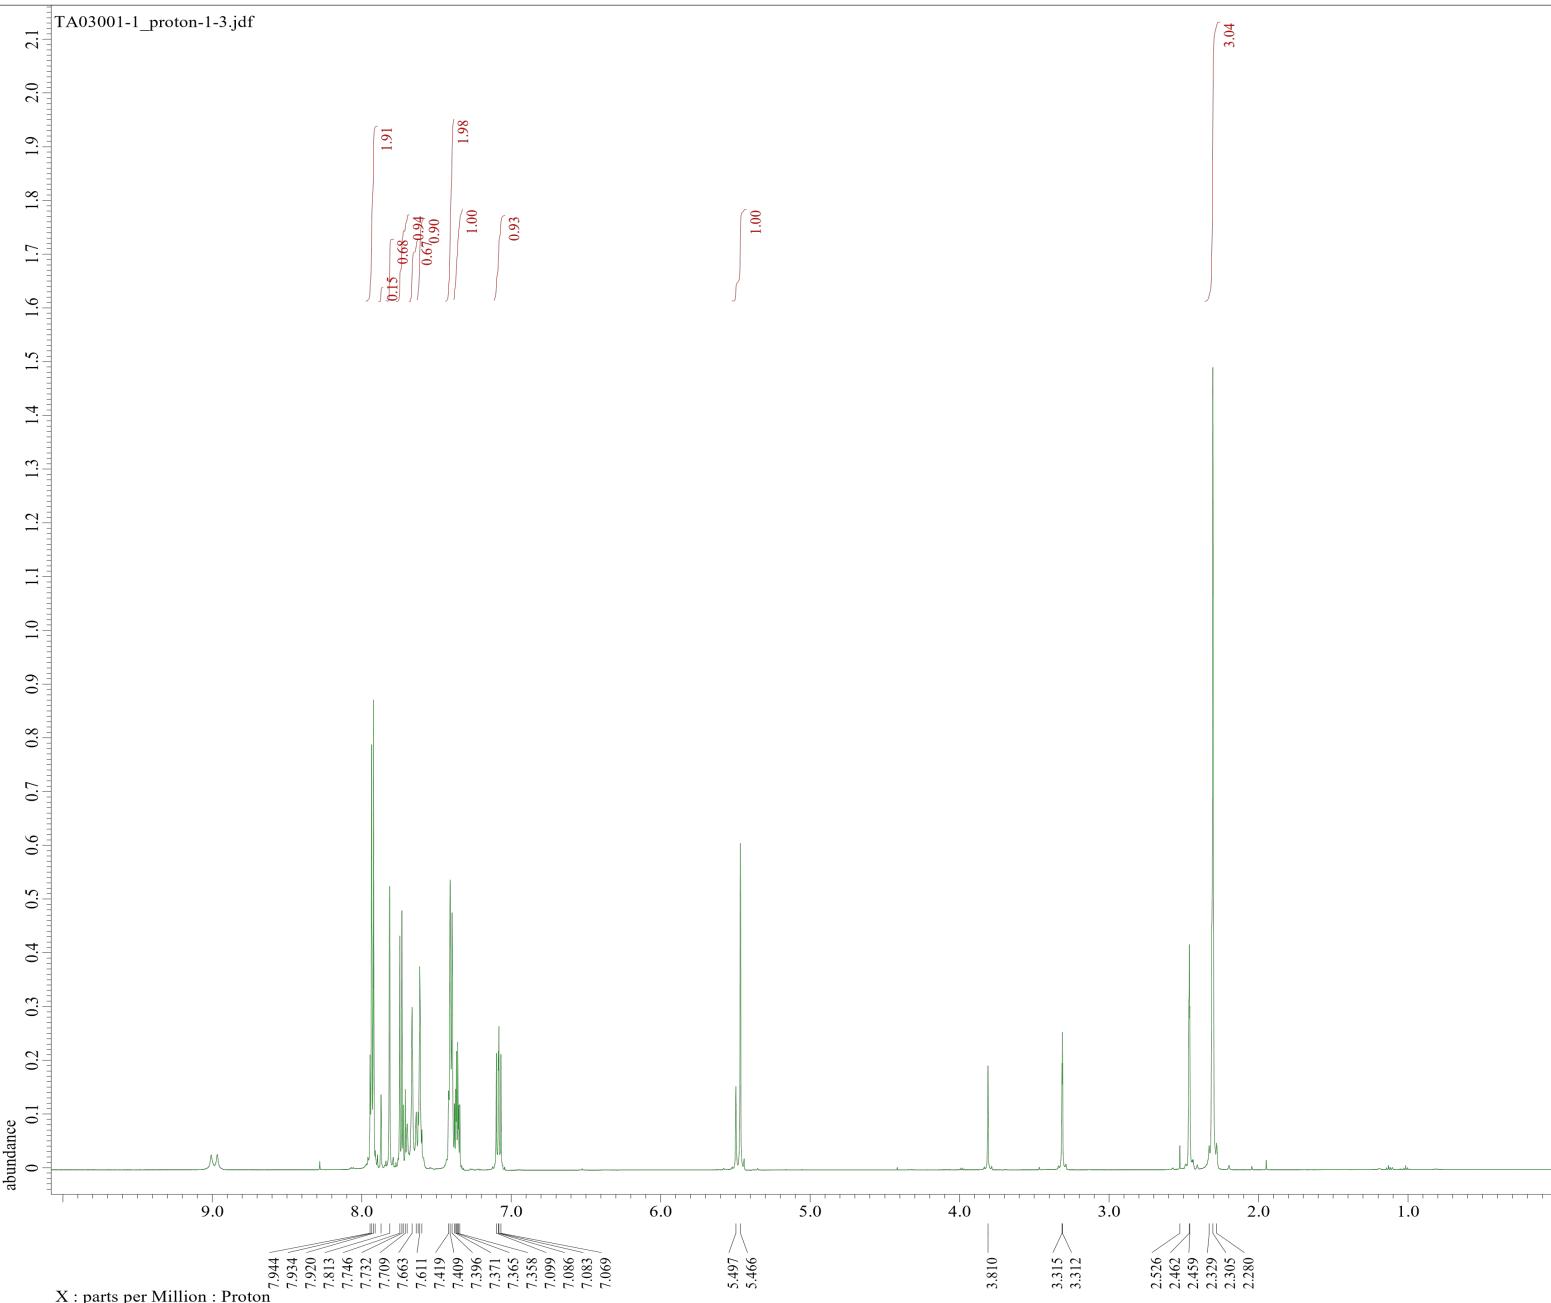

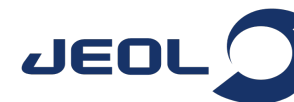

Filename = TA03001-1\_carbon-1  
Author = delta  
Experiment = carbon\_jxp  
Sample\_Id = TA03001-1  
Solvent = DMSO-D6  
Actual\_Start\_Time = 22-DEC-2020 20:26:  
Revision\_Time = 22-DEC-2020 22:24:  
Comment = single pulse decou  
Data\_Format = 1D COMPLEX  
Dim\_Size = 26214  
X\_Domain = Carbon13  
Dim\_File = Carbon13  
Dim\_Units = [ppm]  
Dimensions = X  
Spectrometer = JNM-ECZ600R/S3  
Field\_Strength = 14.09636928[T] (60  
X\_Acq\_Duration = 0.69206016[s]  
X\_Domain = Carbon13  
X\_Freq = 150.91343039[MHz]  
X\_Offset = 100[ppm]  
X\_Points = 32768  
X\_Prescans = 4  
X\_Resolution = 1.44496109[Hz]  
X\_Sweep = 47.34848485[kHz]  
X\_Sweep\_Clippped = 37.87878788[kHz]  
Irr\_Domain = Proton  
Irr\_Freq = 600.1723046[MHz]  
Irr\_Offset = 5[ppm]  
Blanking = 15[us]  
Clipped = FALSE  
Scans = 3000  
Total\_Scans = 3000  
Relaxation\_Delay = 1[s]  
Recvr\_Gain = 56  
Temp\_Get = 19.6[dc]  
X\_90\_Width = 8.8[us]  
X\_Acq\_Time = 0.69206016[s]  
X\_Angle = 90[deg]  
X\_Atn = 11[db]  
X\_Pulse = 2.93333333[us]  
Irr\_Atn\_Dec = 26.162[db]  
Irr\_Atn\_Dec\_Calc = 26.162[db]  
Irr\_Atn\_Dec\_Default\_Calc = 26.162[db]  
Irr\_Atn\_No = 26.162[db]  
Irr\_Dec\_Bandwidth\_Hz = 7.23684211[kHz]  
Irr\_Dec\_Bandwidth\_Ppm = 12.05794078[ppm]  
Irr\_Dec\_Freq = 600.1723046[MHz]  
Irr\_Dec\_Merit\_Factor = 2.2  
Irr\_Decoupling = TRUE  
Irr\_No = TRUE  
Irr\_Noise = WALSE  
Irr\_Offset\_Default = 5[ppm]  
Irr\_Pwidth = 76[us]  
Irr\_Pwidth\_Default = 76[us]  
Irr\_Pwidth\_Default\_Calc = 76[us]  
Irr\_Pwidth\_Templ = 76[us]  
Irr\_Wurst = FALSE  
Decimation\_Rate = 0  
Experiment\_Path = c:\Program Files\J  
Initial\_Wait = 1[s]  
Noe\_Time = 1[s]  
Noe\_Time\_Flag = FALSE  
Relaxation\_Delay\_Calc = 0[s]  
Relaxation\_Delay\_Temp = 1[s]  
Repetition\_Time = 1.69206016[s]

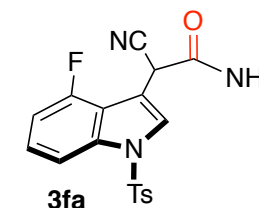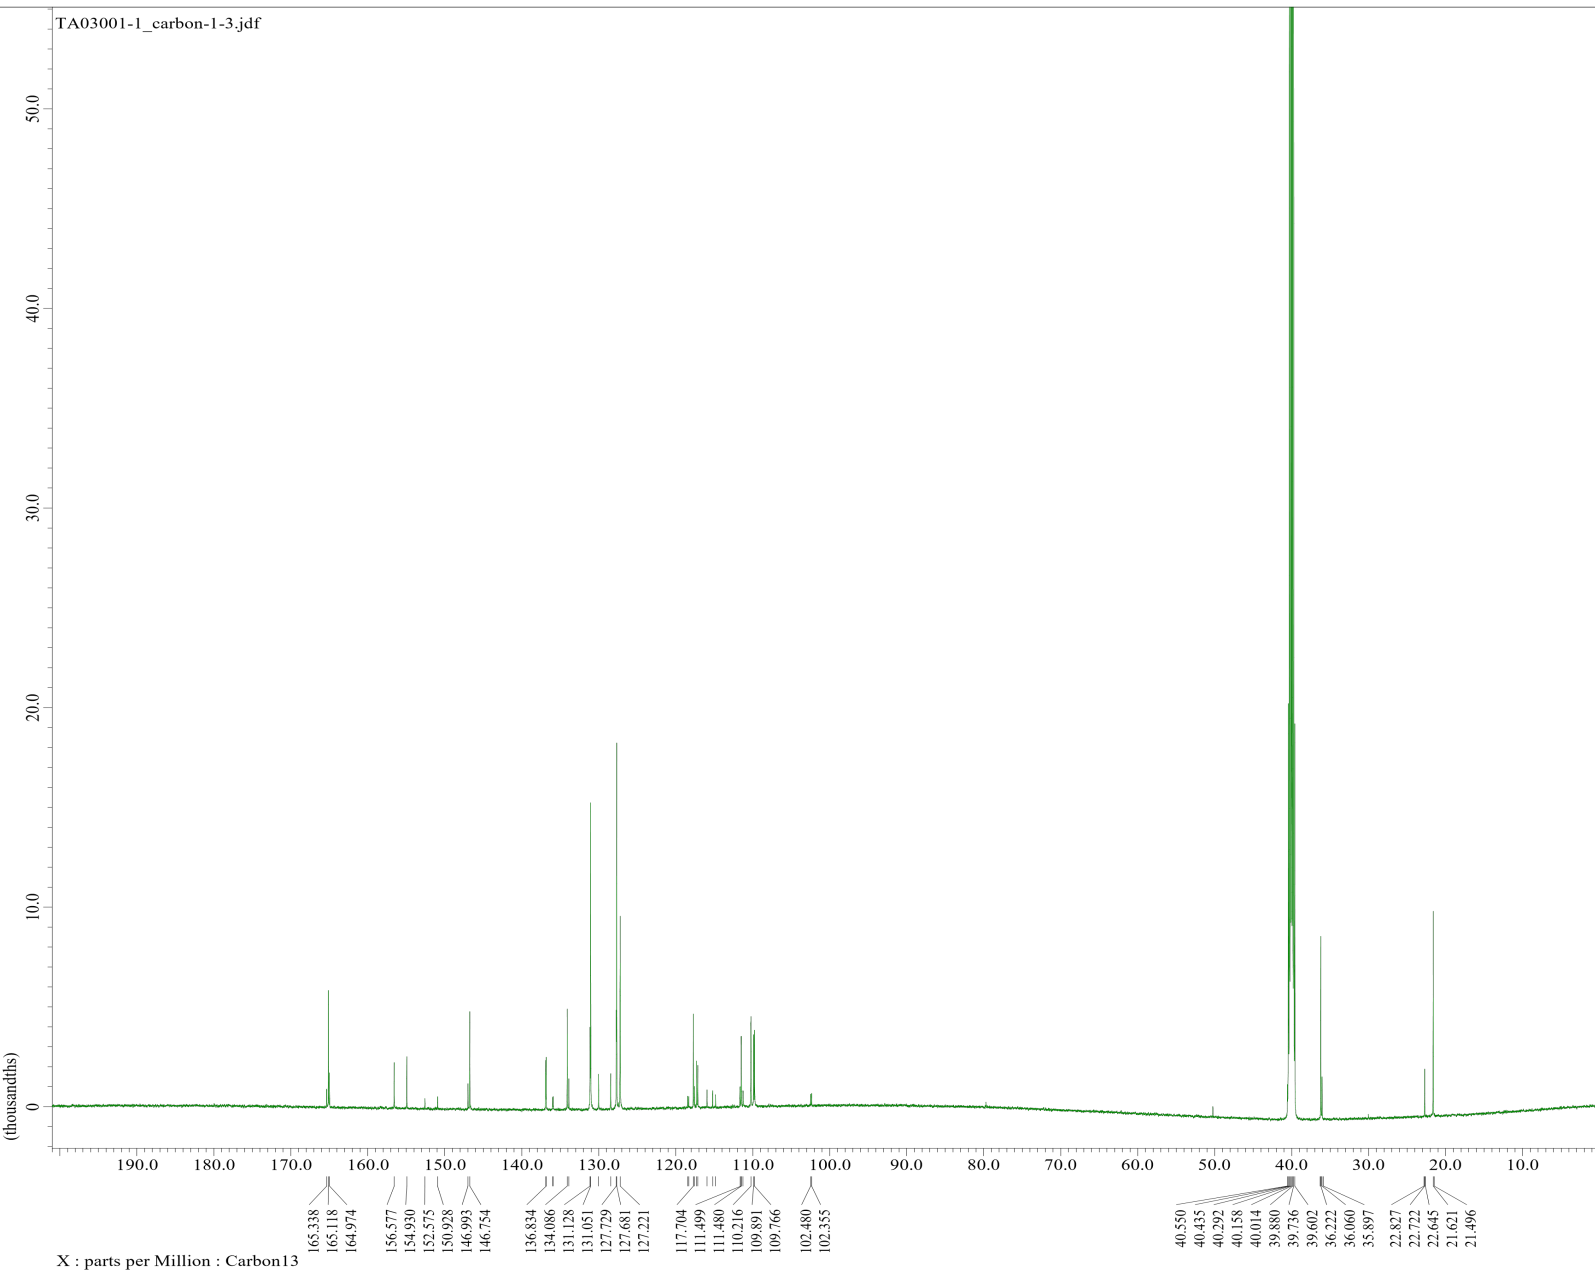

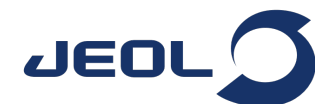

Filename = TA03003-1H-6F\_proton-  
Author = delta  
Experiment = proton.jxp  
Sample\_Id = TA03003-1H-6F  
Solvent = CHLOROFORM-D  
Actual\_Start\_Time = 21-DEC-2020 20:18:08  
Revision\_Time = 21-DEC-2020 20:25:13

Comment = single\_pulse-6F-indol  
Data\_Format = 1D\_COMPLEX  
Dim\_Size = 13107  
X\_Domain = Proton  
Dim\_Title = Proton  
Dim\_Units = [ppm]  
Dimensions = X  
Spectrometer = JNM-ECZ600R/S3

Field\_Strength = 14.09636928 [T] (600 [M])  
X\_Acq\_Duration = 1.09051904 [s]  
X\_Domain = Proton  
X\_Freq = 600.1723046 [MHz]  
X\_Offset = 5 [ppm]  
X\_Points = 16384  
X\_Prescans = 1  
X\_Resolution = 0.91699454 [Hz]  
X\_Sweep = 15.02403846 [kHz]  
X\_Sweep\_Clipped = 12.01923077 [kHz]  
F1\_Domain = Proton  
F1\_Freq = 600.1723046 [MHz]  
F1\_Offset = 5 [ppm]  
F1\_Domain = Proton  
F1\_Freq = 600.1723046 [MHz]  
F1\_Offset = 5 [ppm]  
Blanking = 5 [us]  
Clipped = TRUE  
Scans = 16  
Total\_Scans = 16

Relaxation\_Delay = 5 [s]  
Recvr\_Gain = 56  
Temp\_Get = 19.8 [dC]  
X\_90\_Width = 9.5 [us]  
X\_Acq\_Time = 1.09051904 [s]  
X\_Angle = 45 [deg]  
X\_Atn = 8.1 [dB]  
X\_Pulse = 4.75 [us]  
F1\_Mode = Off  
F1\_Mode = Off  
Dante\_Loop = 500  
Dante\_Presat = FALSE  
Decimation\_Rate = 0  
Experiment\_Path = c:\Program Files\JEOL  
Initial\_Wait = 1 [s]  
Phase = (0, 90, 270, 180, 180)  
Presat\_Time = 5 [s]  
Presat\_Time\_Flag = FALSE  
Relaxation\_Delay\_Calc = 0 [s]  
Relaxation\_Delay\_Temp = 5 [s]  
Repetition\_Time = 6.09051904 [s]

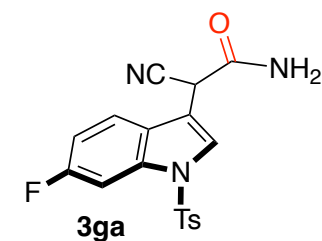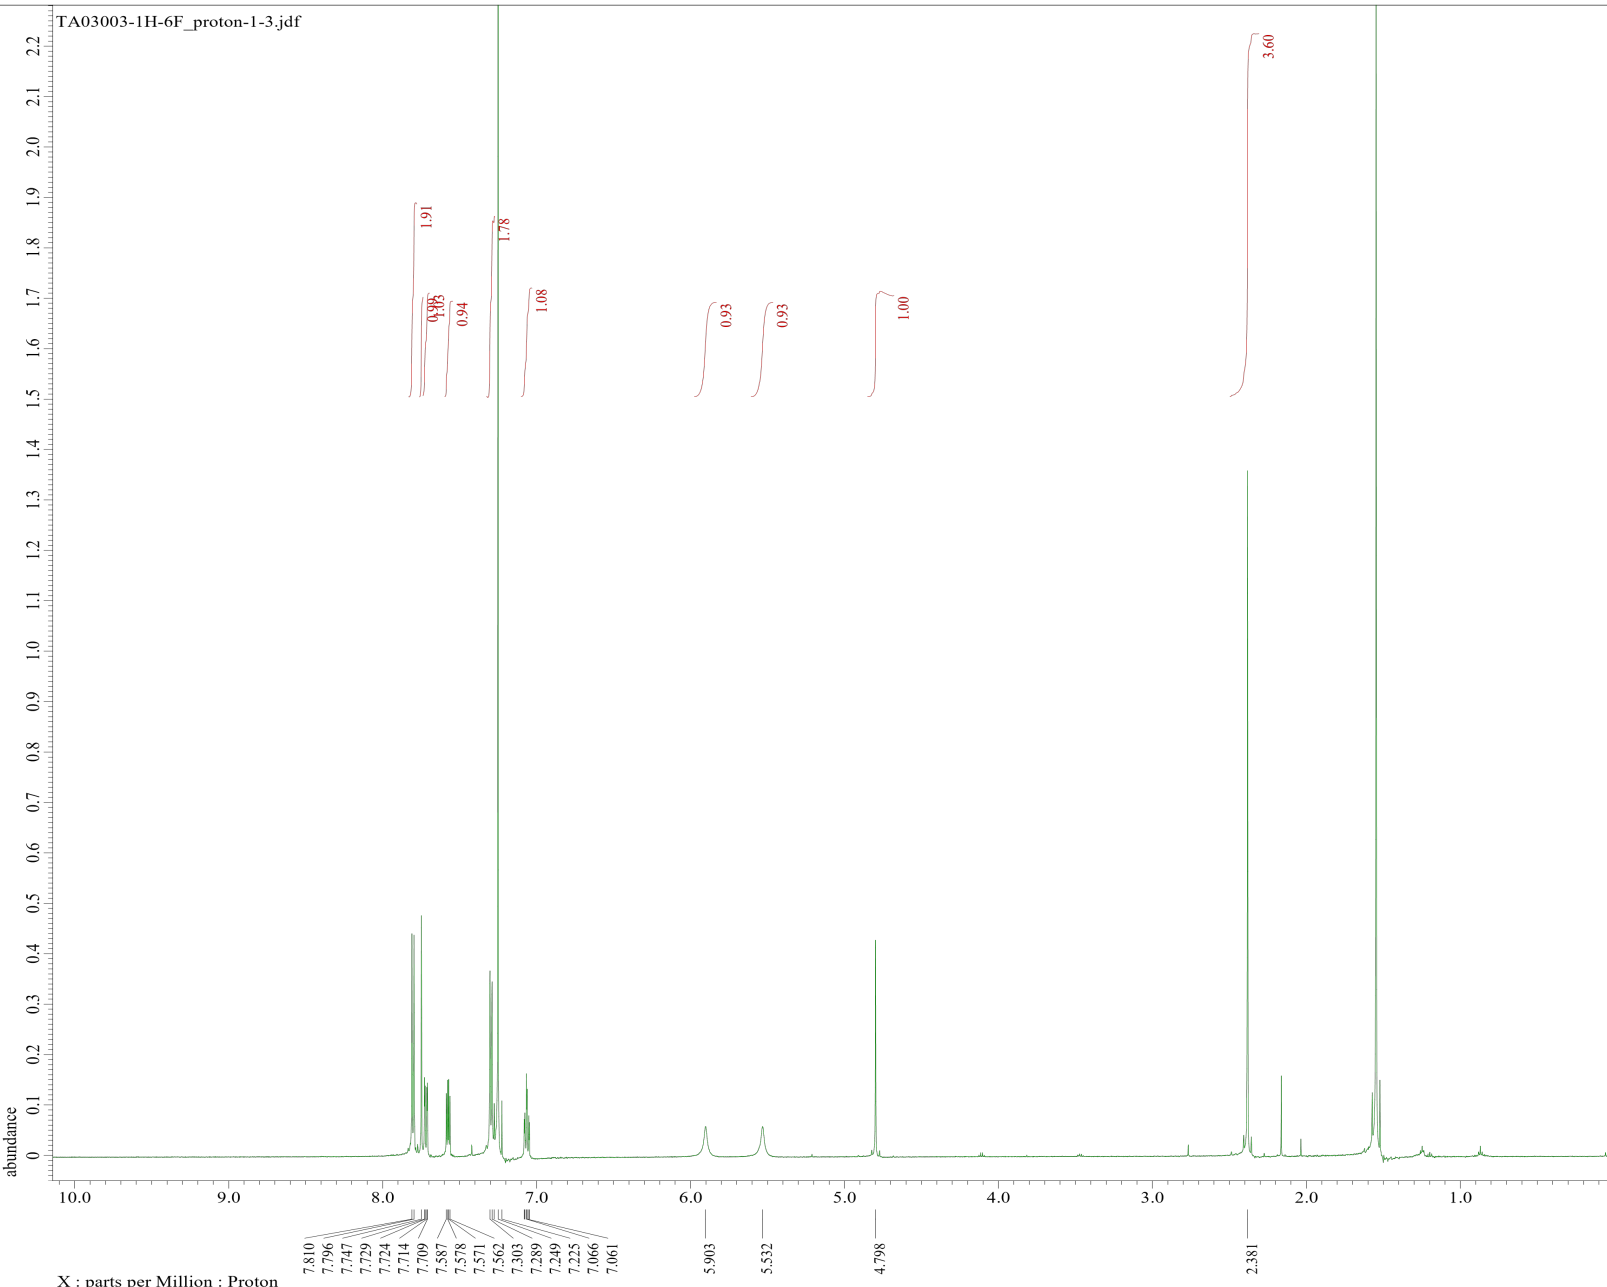

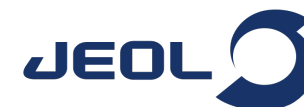

Filename = TA03003-13C-6F\_carbon-1-2.jdf  
Author = delta  
Experiment = carbon\_jxp  
Sample\_Id = TA03003-13C-6F  
Solvent = CHLOROFORM-D  
Actual\_Start\_Time = 21-DEC-2020 20:31:  
Revision\_Time = 21-DEC-2020 22:10:  
Comment = single pulse decou  
Data\_Format = 1D COMPLEX  
Dim\_Size = 26214  
X\_Domain = Carbon13  
Dim\_Title = Carbon13  
Dim\_Units = [ppm]  
Dimensions = X  
Spectrometer = JNM-ECZ600R/S3  
Field\_Strength = 14.09636928[T] (60  
X\_Acq\_Duration = 0.69206016[s]  
X\_Domain = Carbon13  
X\_Freq = 150.91343039[MHz]  
X\_Offset = 100[ppm]  
X\_Points = 32768  
X\_Procscans = 4  
X\_Resolution = 1.44496109[Hz]  
X\_Sweep = 47.34848485[kHz]  
X\_Sweep\_Clipped = 37.87878788[kHz]  
Irr\_Domain = Proton  
Irr\_Freq = 600.1723046[MHz]  
Irr\_Offset = 5[ppm]  
Blanking = 15[us]  
Clipped = TRUE  
Scans = 3000  
Total\_Scans = 3000  
Relaxation\_Delay = 1[s]  
Recvr\_Gain = 56  
Temp\_Get = 19.9[dc]  
X\_90\_Width = 8.8[us]  
X\_Acq\_Time = 0.69206016[s]  
X\_Angle = 30[deg]  
X\_Atn = 11[db]  
X\_Pulse = 2.93333333[us]  
Irr\_Atn\_Dec = 26.162[db]  
Irr\_Atn\_Dec\_Calc = 26.162[db]  
Irr\_Atn\_Dec\_Default\_Calc = 26.162[db]  
Irr\_Atn\_Noise = 26.162[db]  
Irr\_Dec\_Bandwidth\_Hz = 7.23684211[kHz]  
Irr\_Dec\_Bandwidth\_Ppm = 12.05794078[ppm]  
Irr\_Dec\_Freq = 600.1723046[MHz]  
Irr\_Dec\_Merit\_Factor = 2.2  
Irr\_Decoupling = TRUE  
Irr\_Noise = TRUE  
Irr\_Noise = WALTZ  
Irr\_Offset\_Default = 5[ppm]  
Irr\_Pwidth = 76[us]  
Irr\_Pwidth\_Default = 76[us]  
Irr\_Pwidth\_Default\_Calc = 76[us]  
Irr\_Pwidth\_Templ = 76[us]  
Irr\_Wurst = FALSE  
Decimation\_Rate = 0  
Experiment\_Path = c:\Program Files\J  
Initial\_Wait = 1[s]  
Noe\_Time = 1[s]  
Noe\_Time\_Flag = FALSE  
Relaxation\_Delay\_Calc = 0[s]  
Relaxation\_Delay\_Temp = 1[s]  
Repetition\_Time = 1.69206016[s]

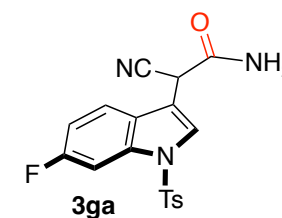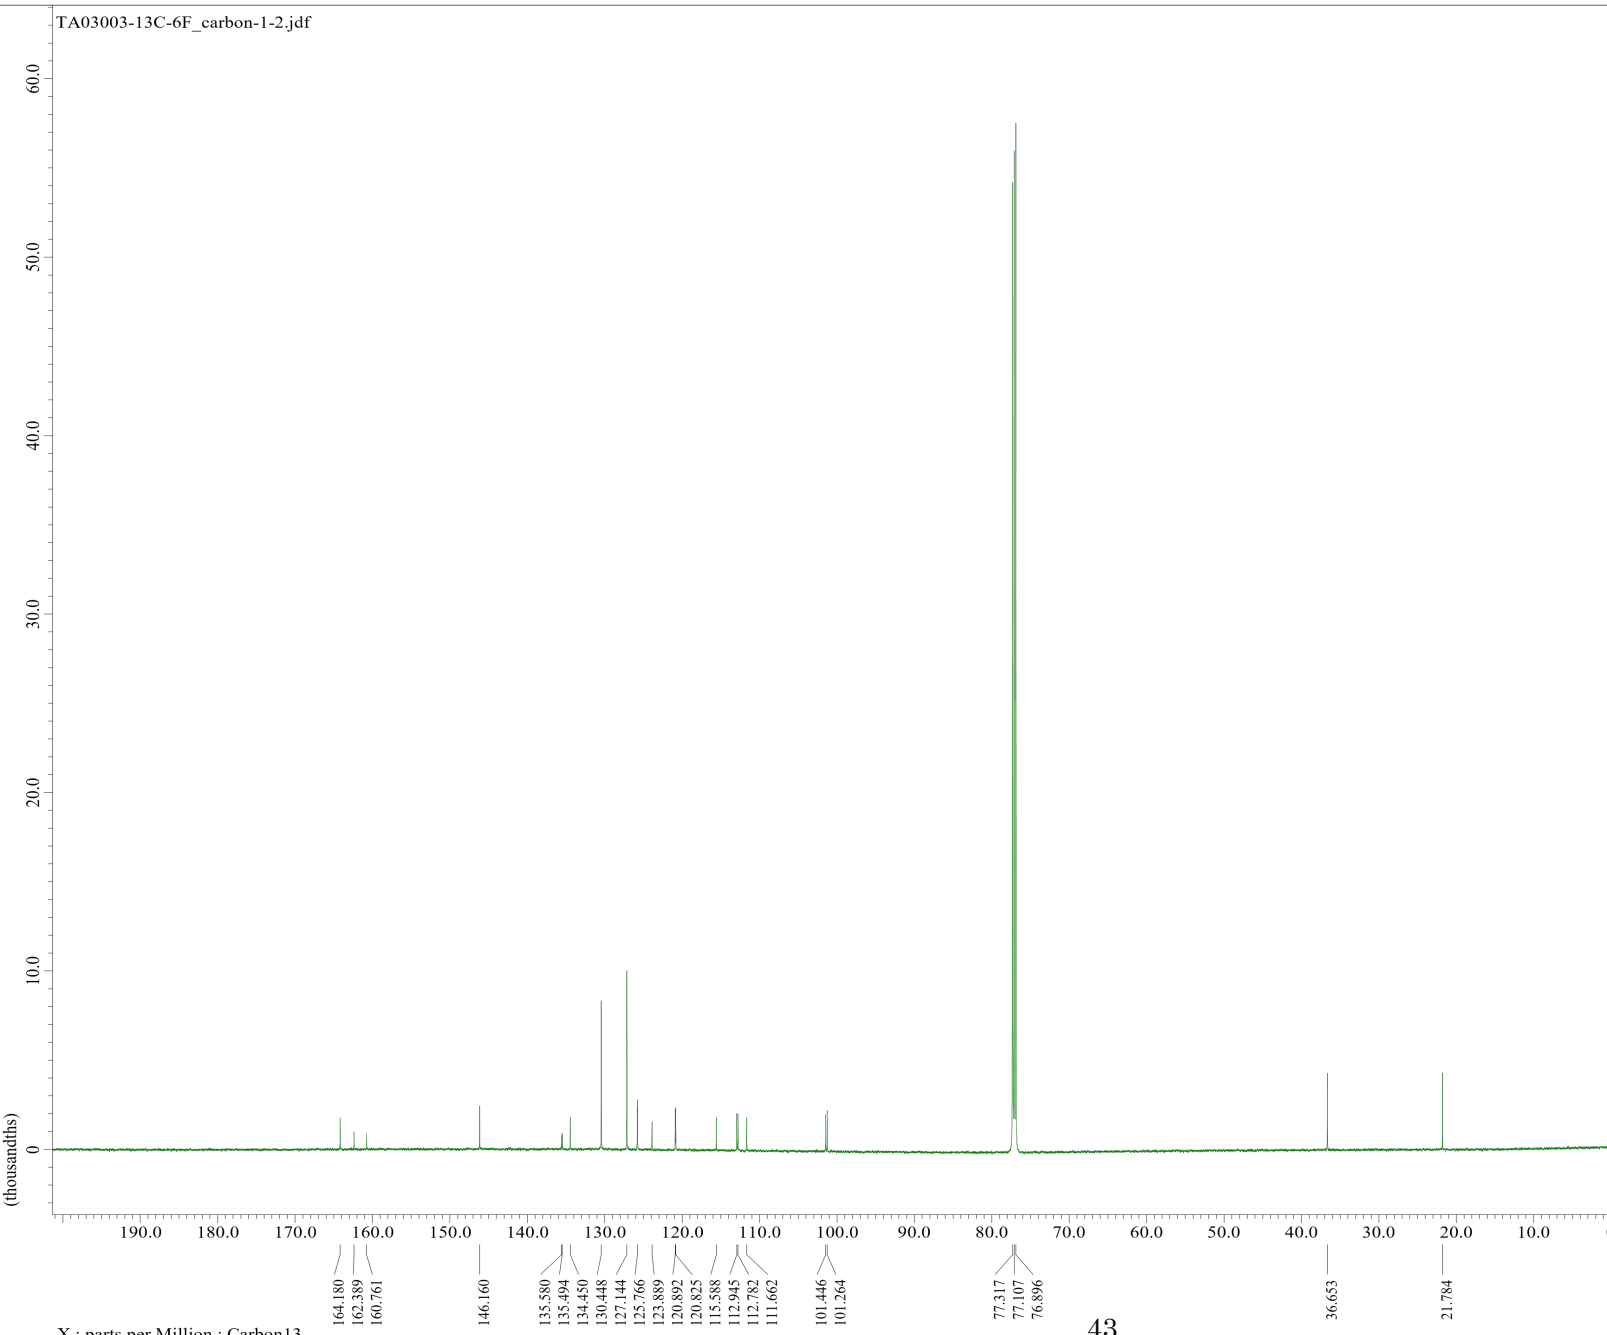

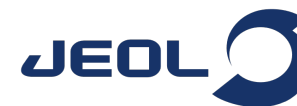

Filename = TA201121-1\_proton-1-3  
Author = delta  
Experiment = proton.jxp  
Sample\_id = TA201121-1  
Solvent = DMSO-d6  
Actual\_Start\_Time = 21-NOV-2020 08:45:06  
Revision\_Time = 21-NOV-2020 09:01:38

Comment = 7F-HITAB  
Data\_Format = 1D COMPLEX  
Dim\_Size = 26214  
X\_Domain = Proton  
Dim\_Title = Proton  
Dim\_Units = [ppm]  
Dimensions = X  
Spectrometer = JNM-ECZ600R/S3

Field\_Strength = 14.09636928 [T] (600 [M])  
X\_Acq\_Duration = 2.9097984 [s]  
X\_Domain = Proton  
X\_Freq = 600.1723046 [MHz]  
X\_Offset = 5 [ppm]  
X\_Points = 32768  
X\_Prescans = 1  
X\_Resolution = 0.34366642 [Hz]  
X\_Sweep = 11.26126126 [kHz]  
X\_Sweep\_Clippped = 9.00900901 [kHz]  
IRF\_Domain = Proton  
IRF\_Freq = 600.1723046 [MHz]  
IRF\_Offset = 5 [ppm]  
Tri\_Domain = Proton  
Tri\_Freq = 600.1723046 [MHz]  
Tri\_Offset = 5 [ppm]  
Blanking = FALSE  
Clipped = FALSE  
Scans = 16  
Total\_Scans = 16

Relaxation\_Delay = 1 [s]  
Recvr\_Gain = 46  
Temp\_Get = 20.4 [dC]  
X\_90\_Width = 9.5 [us]  
X\_Acq\_Time = 2.9097984 [s]  
X\_Angle = 45 [deg]  
X\_Atn = 8.1 [dB]  
X\_Pulse = 4.75 [us]  
IRF\_Mode = Off  
Tri\_Mode = Off  
Dante\_Loop = 100  
Dante\_Presat = FALSE  
Decimation\_Rate = 0  
Experiment\_Path = c:\Program Files\JEOL  
Initial\_Wait = 1 [s]  
Phase = {0, 90, 270, 180, 180}  
Presat\_Time = 1 [s]  
Presat\_Time\_Flag = FALSE  
Relaxation\_Delay\_Calc = 0 [s]  
Relaxation\_Delay\_Temp = 1 [s]  
Repetition\_Time = 3.9097984 [s]

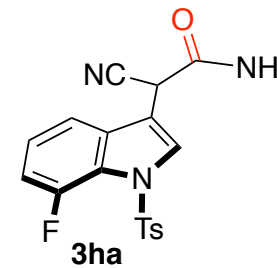

TA201121-1\_proton-1-3.jdf

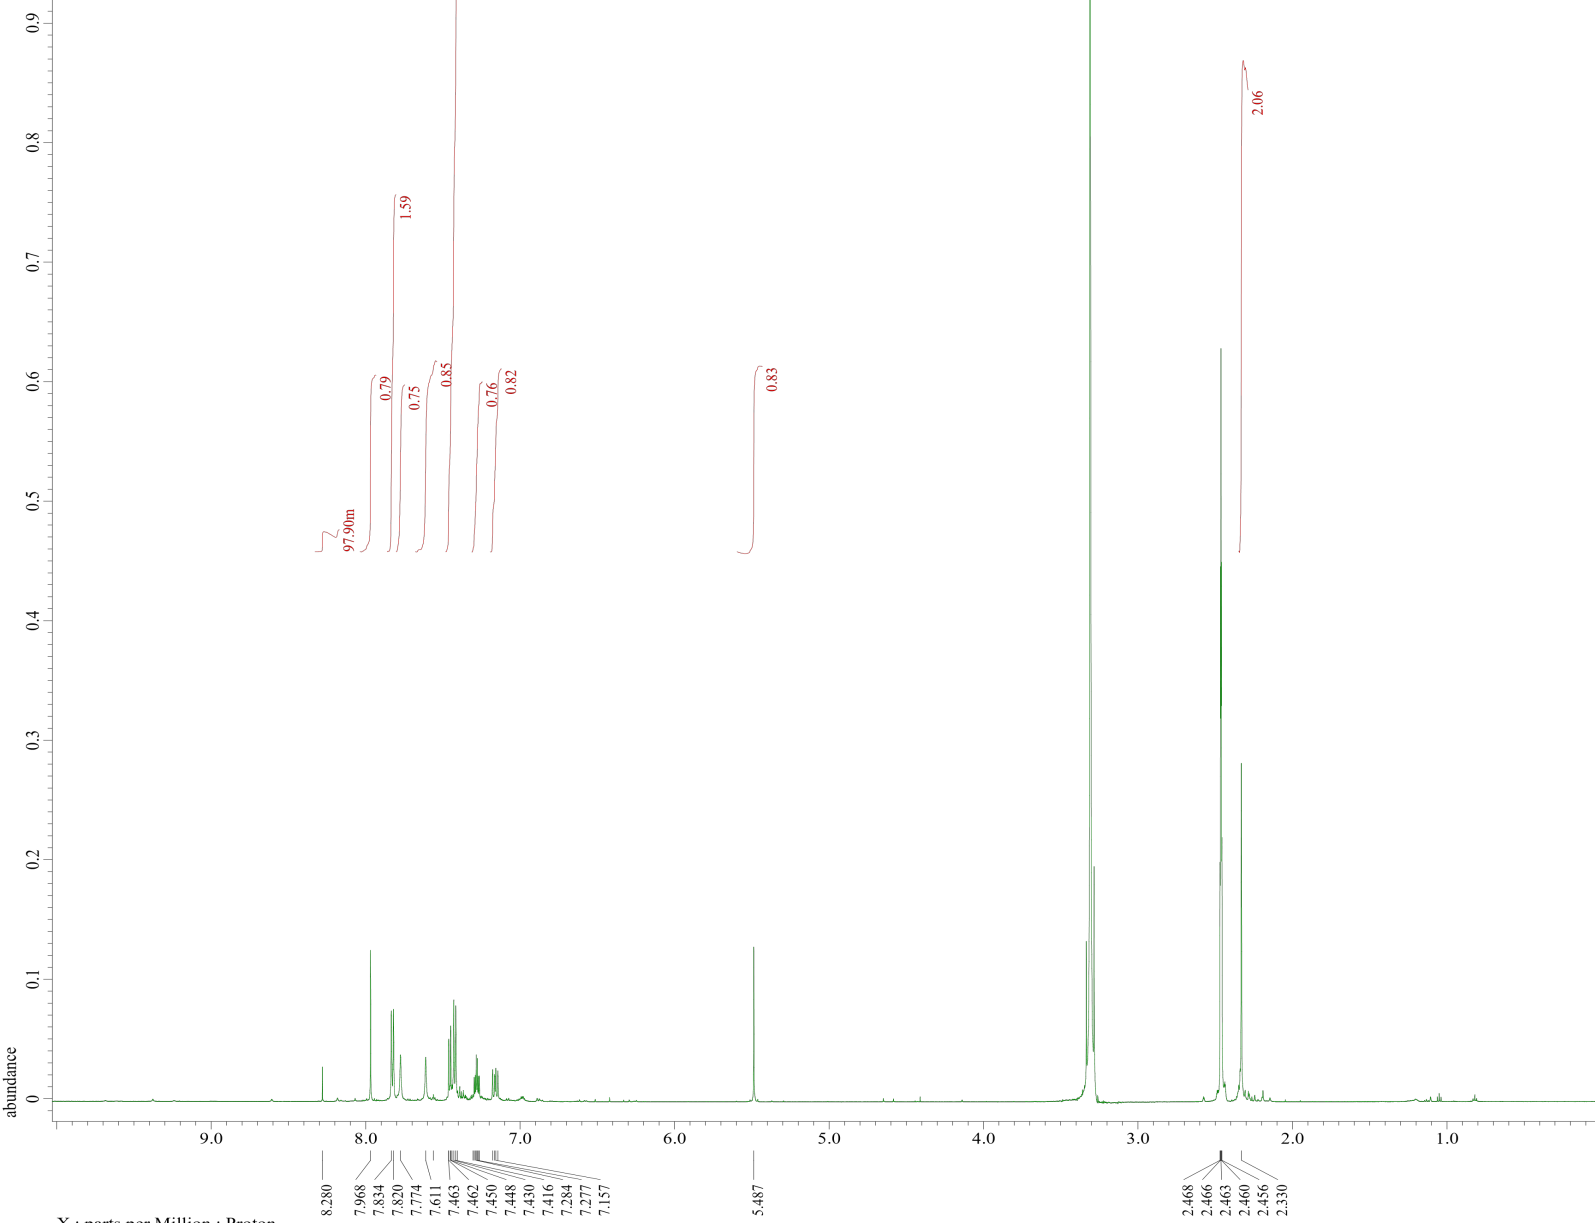



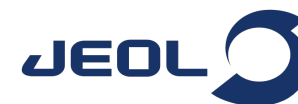

Filename = TA201121-2\_carbon-  
Author = delta  
Experiment = carbon.jxp  
Sample\_Id = TA201121-2  
Solvent = DMSO-D6  
Actual\_Start\_Time = 21-NOV-2020 08:57:  
Revision\_Time = 21-NOV-2020 11:42:

Comment = single pulse decou  
Data\_Format = 1D COMPLEX  
Dim\_Size = 26214  
X\_Domain = Carbon13  
Dim\_Title = Carbon13  
Dim\_Units = [ppm]  
Dimensions = X  
Spectrometer = JNM-ECZ600R/S3

Field\_Strength = 14.09636928 [T] (60  
X\_Acq\_Duration = 0.69206016 [s]  
X\_Domain = Carbon13  
X\_Freq = 150.91343039 [MHz]  
X\_Offset = 100 [ppm]  
X\_Points = 32768  
X\_Prescans = 4  
X\_Resolution = 1.44496109 [Hz]  
X\_Sweep = 47.34848485 [kHz]  
X\_Sweep\_Clippped = 37.87878788 [kHz]  
Irr\_Domain = Proton  
Irr\_Freq = 600.1723046 [MHz]  
Irr\_Offset = 5 [ppm]  
Blanking = 15 [us]  
Clipped = FALSE  
Scans = 5000  
Total\_Scans = 5000

Relaxation\_Delay = 1 [s]  
Recvr\_Gain = 56  
Temp\_Get = 19.3 [dC]  
X\_90\_Width = 8.8 [us]  
X\_Acq\_Time = 0.69206016 [s]  
X\_Angle = 30 [deg]  
X\_Atn = 11 [dB]  
X\_Pulse = 2.93333333 [us]  
Irr\_Atn\_Dec = 26.162 [dB]  
Irr\_Atn\_Dec\_Calc = 26.162 [dB]  
Irr\_Atn\_Dec\_Default\_Calc = 26.162 [dB]  
Irr\_Atn\_No = 26.162 [dB]  
Irr\_Dec\_Bandwidth\_Hz = 7.23684211 [kHz]  
Irr\_Dec\_Bandwidth\_Ppm = 12.05794078 [ppm]  
Irr\_Dec\_Freq = 600.1723046 [MHz]  
Irr\_Dec\_Merit\_Factor = 2.2  
Irr\_Decoupling = TRUE  
Irr\_No = TRUE  
Irr\_Noise = WALTZ  
Irr\_Offset\_Default = 5 [ppm]  
Irr\_Pwidth = 76 [us]  
Irr\_Pwidth\_Default = 76 [us]  
Irr\_Pwidth\_Default\_Calc = 76 [us]  
Irr\_Pwidth\_Templ = 76 [us]  
Irr\_Wurst = FALSE  
Decimation\_Rate = 0  
Experiment\_Path = c:\Program Files\J  
Initial\_Wait = 1 [s]  
Noe\_Time = 1 [s]  
Noe\_Time\_Flag = FALSE  
Relaxation\_Delay\_Calc = 0 [s]  
Relaxation\_Delay\_Temp = 1 [s]  
Repetition\_Time = 1.69206016 [s]

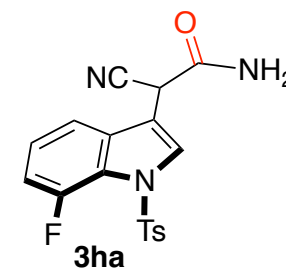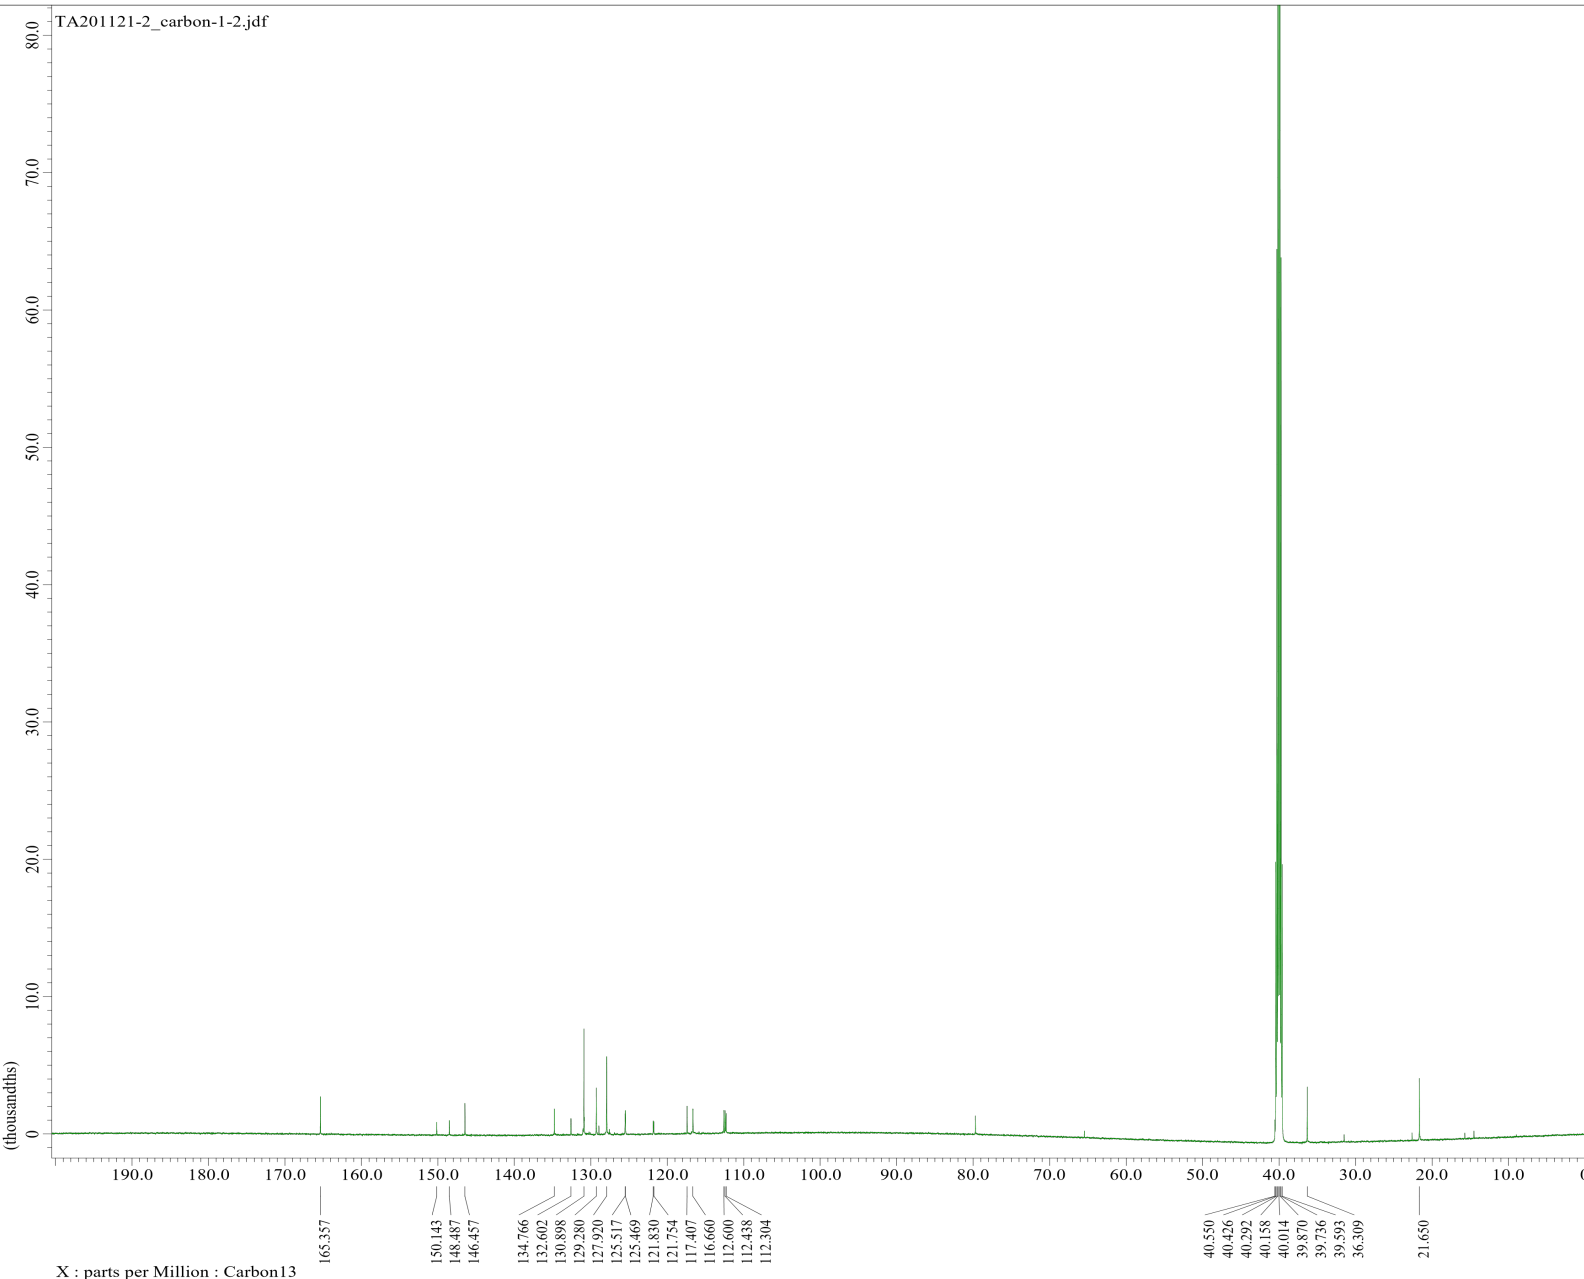

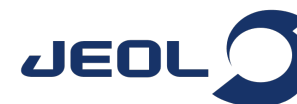

Filename = TA02086-5MeO\_1\_proton  
Author = delta  
Experiment = proton.jxp  
Sample\_Id = TA02086-5Meo\_1  
Solvent = DMSO-D6  
Actual\_Start\_Time = 11-NOV-2020 08:48:20  
Revision\_Time = 11-NOV-2020 08:50:12

Comment = single\_pulse-5MeO  
Data\_Format = 1D\_COMPLEX  
Dim\_Size = 26214  
X\_Domain = Proton  
Dim\_Title = Proton  
Dim\_Units = [ppm]  
Dimensions = X  
Spectrometer = JNM-ECZ600R/S3

Field\_Strength = 14.09636928 [T] (600 [M])  
X\_Acq\_Duration = 2.90455552 [s]  
X\_Domain = Proton  
X\_Freq = 600.1723046 [MHz]  
X\_Offset = 5 [ppm]  
X\_Points = 32768  
X\_Prescans = 1  
X\_Resolution = 0.34428676 [Hz]  
X\_Sweep = 11.28158845 [kHz]  
X\_Sweep\_Clippped = 9.02527076 [kHz]  
Irr\_Domain = Proton  
Irr\_Freq = 600.1723046 [MHz]  
Irr\_Offset = 5 [ppm]  
Tri\_Domain = Proton  
Tri\_Freq = 600.1723046 [MHz]  
Tri\_Offset = 5 [ppm]  
Blanking = 5 [us]  
Clipped = TRUE  
Scans = 16  
Total\_Scans = 16

Relaxation\_Delay = 1 [s]  
Recvr\_Gain = 56  
Temp\_Get = 19.5 [dC]  
X\_90\_Width = 9.5 [us]  
X\_Acq\_Time = 2.90455552 [s]  
X\_Angle = 45 [deg]  
X\_Atn = 8.1 [dB]  
X\_Pulse = 4.75 [us]  
Irr\_Mode = Off  
Tri\_Mode = Off  
Dante\_Loop = 100  
Dante\_Presat = FALSE  
Decimation\_Rate = 0  
Experiment\_Path = C:\Program Files\JEOL  
Initial\_Wait = 1 [s]  
Phase = (0, 90, 270, 180, 180)  
Presat\_Time = 1 [s]  
Presat\_Time\_Flag = FALSE  
Relaxation\_Delay\_Calc = 0 [s]  
Relaxation\_Delay\_Temp = 1 [s]  
Repetition\_Time = 3.90455552 [s]

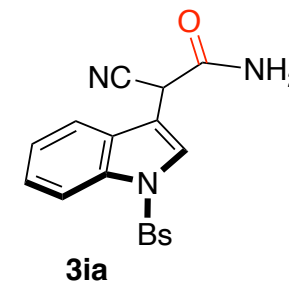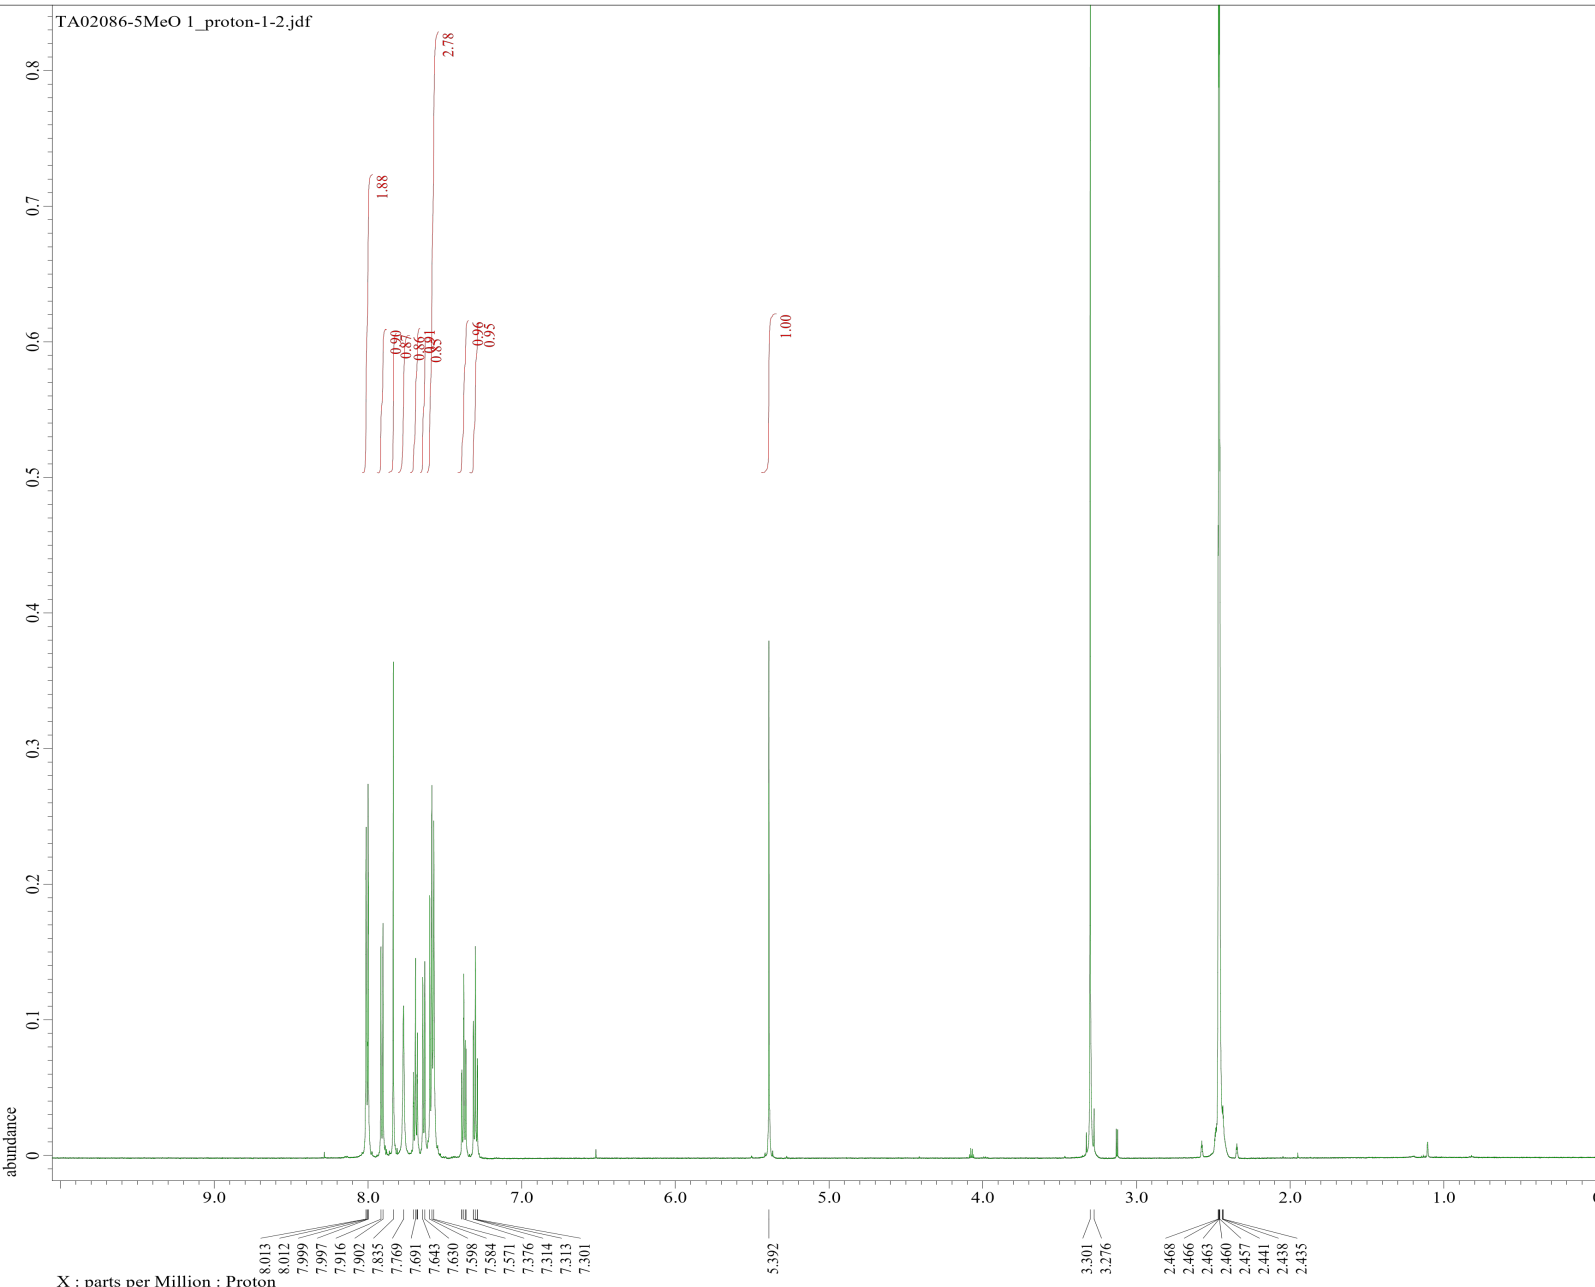

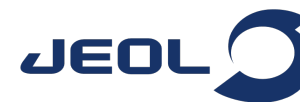

TA02084-1\_carbon-1-2.jdf

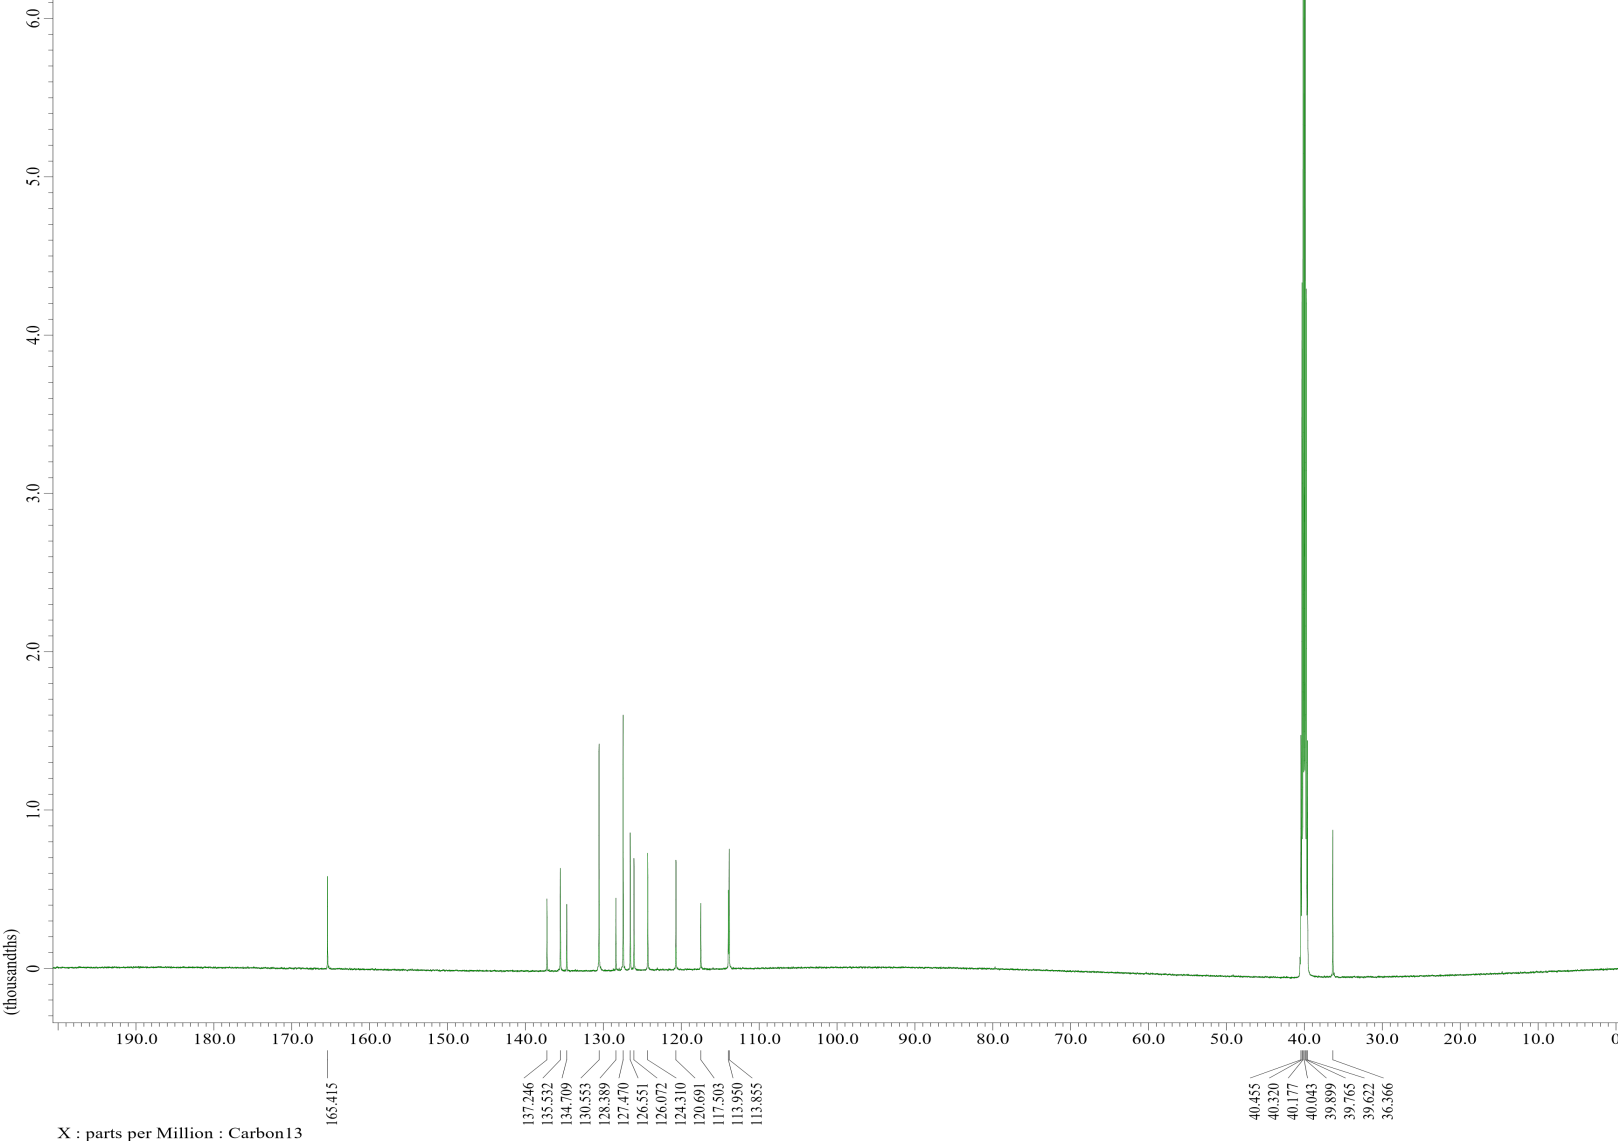

```
Filename      = TA02084-1_carbon-1
Author       = delta
Experiment   = carbon_jxp
Sample_Id    = TA02084-1
Solvent      = DMSO-D6
Actual_Start_Time = 11-NOV-2020 00:02:
Revision_Time = 11-NOV-2020 20:38:

Comment      = single pulse decou
Data_Format  = 1D_COMPLEX
Dim_Size     = 26214
X_Domain     = Carbon13
Dim_Title    = Carbon13
Dim_Units    = [ppm]
Dimensions   = X
Spectrometer = JNM-ECZ600R/S3

Field_Strength = 14.09636928[T] (60
X_Acq_Duration = 0.69206016[s]
X_Domain       = Carbon13
X_Freq         = 150.91343039[MHz]
X_Offset       = 100 [ppm]
X_Points       = 32768
X_Prescans     = 4
X_Resolution   = 1.44496109[Hz]
X_Sweep        = 47.34848485 [kHz]
X_Sweep_Clipped = 37.87878788 [kHz]
Irr_Domain     = Proton
Irr_Freq       = 600.1723046 [MHz]
Irr_Offset     = 5 [ppm]
Blanking       = 15 [us]
Clipped        = FALSE
Scans          = 6000
Total_Scans    = 6000

Relaxation_Delay = 1 [s]
Recvr_Gain       = 36
Temp_Get        = 19.5 [dC]
X_90_Width      = 8.8 [us]
X_Acq_Time      = 0.69206016[s]
X_Angle         = 30 [deg]
X_Atn           = 11 [dB]
X_Pulse         = 2.93333333 [us]
Irr_Atn_Dec     = 26.162 [dB]
Irr_Atn_Dec_Calc = 26.162 [dB]
Irr_Atn_Dec_Default_Calc = 26.162 [dB]
Irr_Atn_No     = 26.162 [dB]
Irr_Dec_Bandwidth_Hz = 7.23684211 [kHz]
Irr_Dec_Bandwidth_Fpm = 12.05794078 [ppm]
Irr_Dec_Freq    = 600.1723046 [MHz]
Irr_Dec_Merit_Factor = 2.2
Irr_Decoupling = TRUE
Irr_No     = TRUE
Irr_Noise = WALTZ
Irr_Offset_Default = 5 [ppm]
Irr_Pwidth = 76 [us]
Irr_Pwidth_Default = 76 [us]
Irr_Pwidth_Default_Calc = 76 [us]
Irr_Pwidth_Templ = 76 [us]
Irr_Wurst = FALSE
Decimation_Rate = 0
Experiment_Path = c:\Program Files\J
Initial_Wait = 1 [s]
Noe_Time = 1 [s]
Noe_Time_Flag = FALSE
Relaxation_Delay_Calc = 0 [s]
Relaxation_Delay_Temp = 1 [s]
Repetition_Time = 1.69206016[s]
```

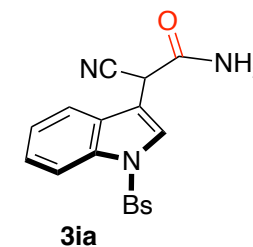

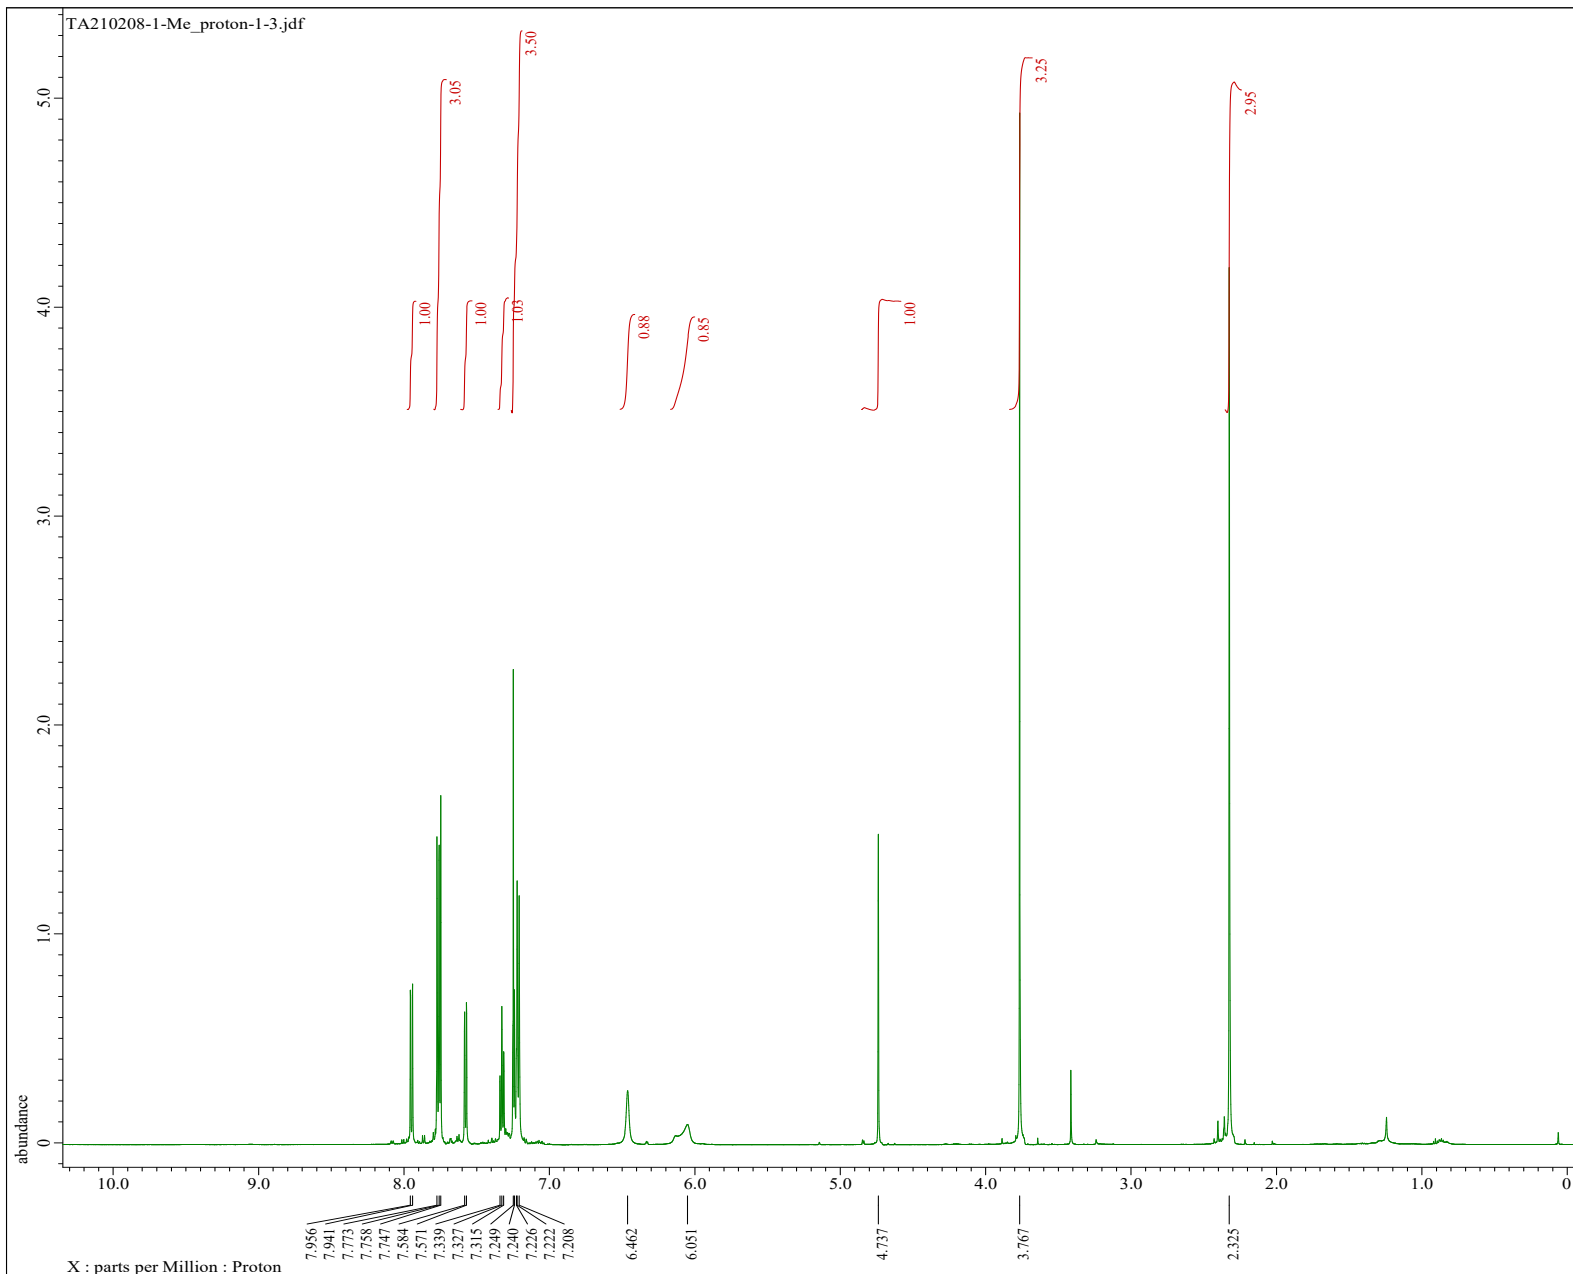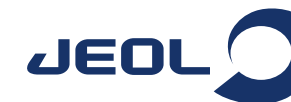

Filename = TA210208-1-Me\_proton-  
 Author = delta  
 Experiment = proton.jxp  
 Sample\_Id = TA210208-1-Me  
 Solvent = CHLOROFORM-D  
 Actual\_Start\_Time = 8-FEB-2021 20:39:38  
 Revision\_Time = 8-FEB-2021 20:44:36

Comment = Me-ester  
 Data\_Format = ID COMPLEX  
 Dim\_Size = 13107  
 X\_Domain = Proton  
 Dim\_Title = Proton  
 Dim\_Units = [ppm]  
 Dimensions = X  
 Spectrometer = JNM-EC2600R/S3

Field\_Strength = 14.09636928 [T] (600[M  
 X\_Acq\_Duration = 1.09051904[s]  
 X\_Domain = Proton  
 X\_Freq = 600.1723046 [MHz]  
 X\_Offset = 5 [ppm]  
 X\_Points = 16384  
 X\_Prescans = 1  
 X\_Resolution = 0.91699454 [Hz]  
 X\_Sweep = 15.02403846 [kHz]  
 X\_Sweep\_Clipped = 12.01923077 [kHz]  
 Irr\_Domain = Proton  
 Irr\_Freq = 600.1723046 [MHz]  
 Irr\_Offset = 5 [ppm]  
 Tri\_Domain = Proton  
 Tri\_Freq = 600.1723046 [MHz]  
 Tri\_Offset = 5 [ppm]  
 Blanking = 5 [us]  
 Clipped = FALSE  
 Scans = 16  
 Total\_Scans = 16

Relaxation\_Delay = 5 [s]  
 Recvr\_Gain = 36  
 Temp\_Get = 20.2 [dC]  
 X\_90\_Width = 9.5 [us]  
 X\_Acq\_Time = 1.09051904 [s]  
 X\_Angle = 45 [deg]  
 X\_Atn = 8.1 [dB]  
 X\_Pulse = 4.75 [us]  
 Irr\_Mode = Off  
 Tri\_Mode = Off  
 Dante\_Loop = 500  
 Dante\_Presat = FALSE  
 Decimation\_Rate = 0  
 Experiment\_Path = c:\Program Files\JEOL  
 Initial\_Wait = 1 [s]  
 Phase = (0, 90, 270, 180, 180  
 Presat\_Time = 5 [s]  
 Presat\_Time\_Flag = FALSE  
 Relaxation\_Delay\_Calc = 0 [s]  
 Relaxation\_Delay\_Temp = 5 [s]  
 Repetition\_Time = 6.09051904 [s]

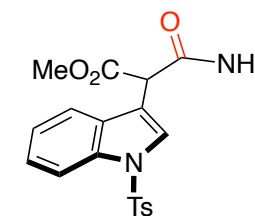

3ab

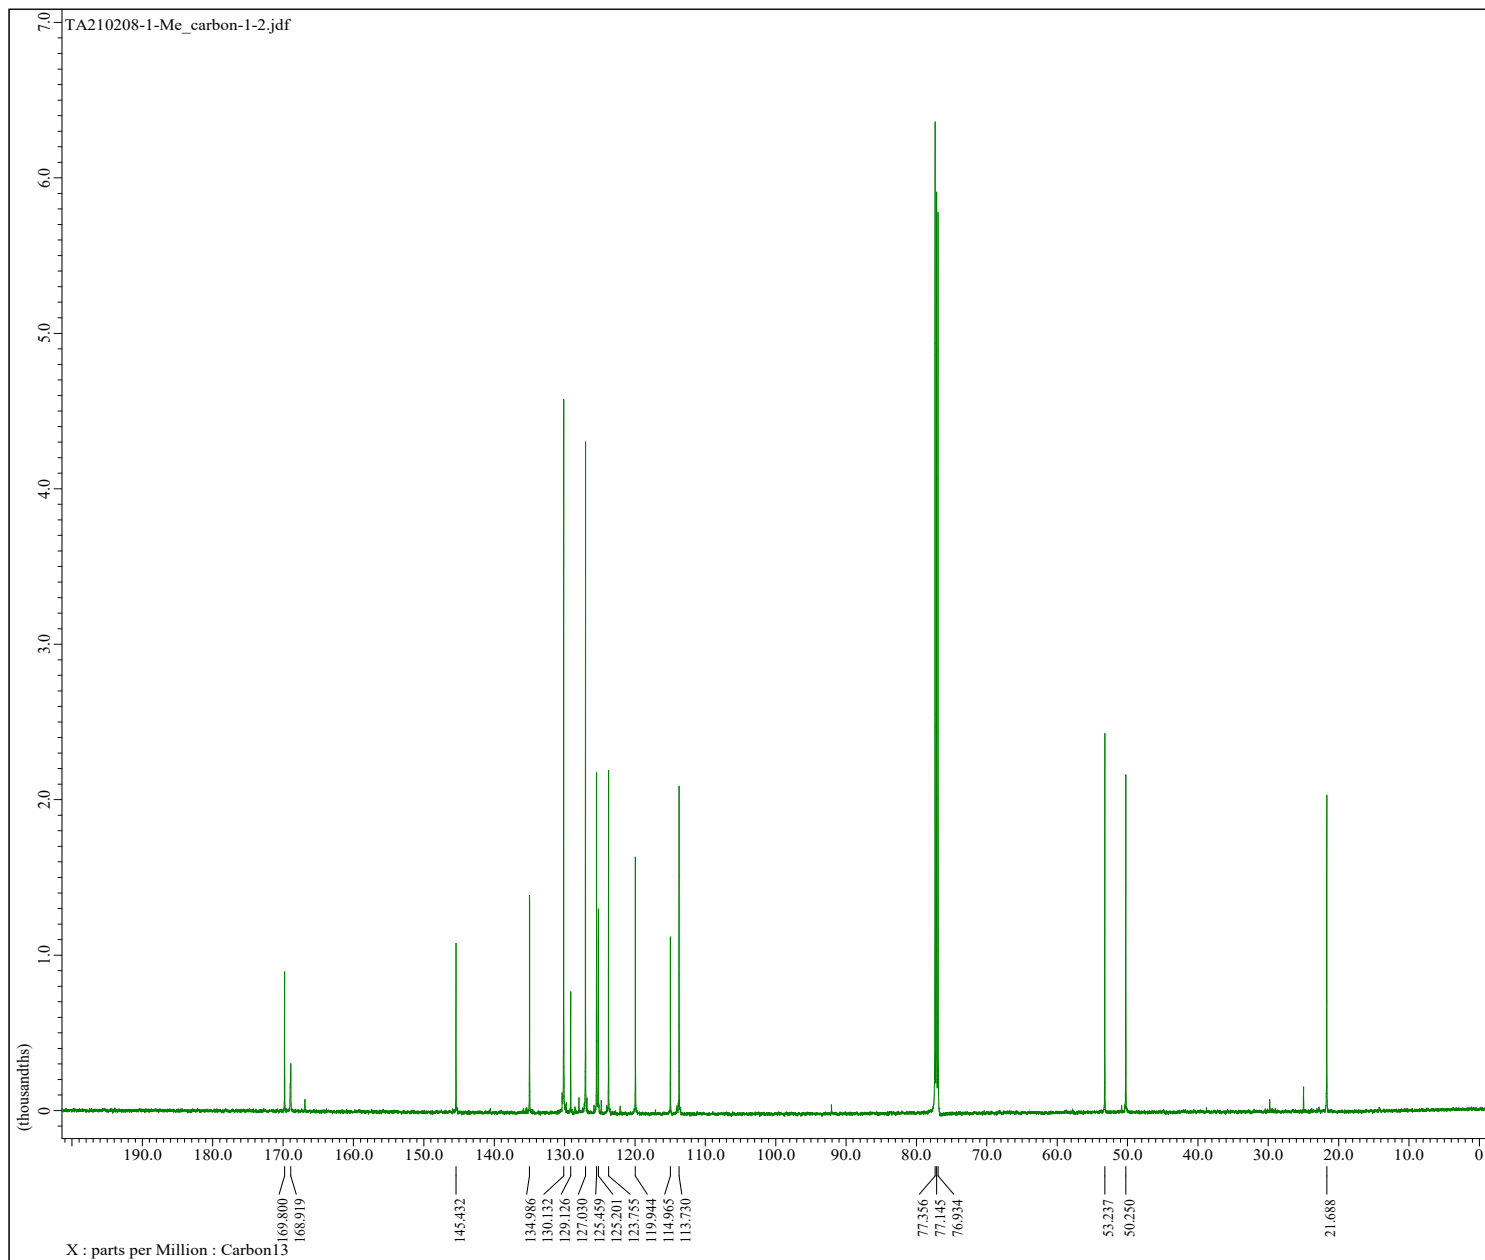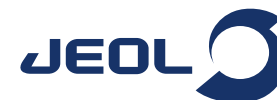

```

Filename      = TA210208-1-Me_carb
Author        = delta
Experiment    = carbon.jxp
Sample_id     = TA210208-1-Me
Solvent       = CHLOROFORM-D
Actual_Start_Time = 8-FEB-2021 20:43:
Revision_Time = 8-FEB-2021 22:27:

Comment       = Me-ester
Data_Format   = 1D COMPLEX
Dim_Size      = 26214
X_Domain      = Carbon13
Dim_Title     = Carbon13
Dim_Units     = [ppm]
Dimensions    = X
Spectrometer  = JNM-ECZ600R/S3

Field_Strength = 14.09636928[T] (60
X_Acq_Duration = 0.69206016[s]
X_Domain       = Carbon13
X_Freq         = 150.91343039[MHz]
X_Offset       = 100[ppm]
X_Points       = 32768
X_Prescans     = 4
X_Resolution   = 1.44496109[Hz]
X_Sweep        = 47.34848485[kHz]
X_Sweep_Clipped = 37.87878788[kHz]
Irr_Domain     = Proton
Irr_Freq       = 600.1723046[MHz]
Irr_Offset     = 5[ppm]
Blanking       = 15[us]
Clipped        = TRUE
Scans          = 1500
Total_Scans    = 1500

Relaxation_Delay = 1[s]
Recvr_Gain       = 36
Temp_Get         = 20.1[dC]
X_90_Width      = 8.8[us]
X_Acq_Time      = 0.69206016[s]
X_Angle         = 30[deg]
X_Atn           = 11[dB]
X_Pulse         = 2.93333333[us]
Irr_Atn_Dec     = 26.162[db]
Irr_Atn_Dec_Calc = 26.162[db]
Irr_Atn_Dec_Default_Calc = 26.162[db]
Irr_Atn_Noise   = 26.162[db]
Irr_Dec_Bandwidth_Hz = 7.23684211[kHz]
Irr_Dec_Bandwidth_Ppm = 12.05794078[ppm]
Irr_Dec_Freq    = 600.1723046[MHz]
Irr_Dec_Merit_Factor = 2.2
Irr_Decoupling = TRUE
Irr_Noise      = WALTZ
Irr_Offset_Default = 5[ppm]
Irr_Fwidth     = 76[us]
Irr_Fwidth_Default = 76[us]
Irr_Fwidth_Default_Calc = 76[us]
Irr_Fwidth_Templ = 76[us]
Irr_Wurst      = FALSE
Decimation_Rate = 0
Experiment_Path = c:\Program Files\J
Initial_Wait   = 1[s]
Noe_Time       = 1[s]
Noe_Time_Flag  = FALSE
Relaxation_Delay_Calc = 0[s]
Relaxation_Delay_Temp = 1[s]
Repetition_Time = 1.69206016[s]

```

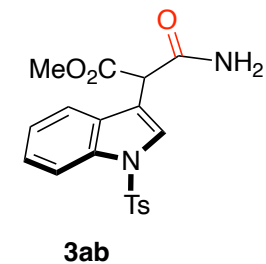

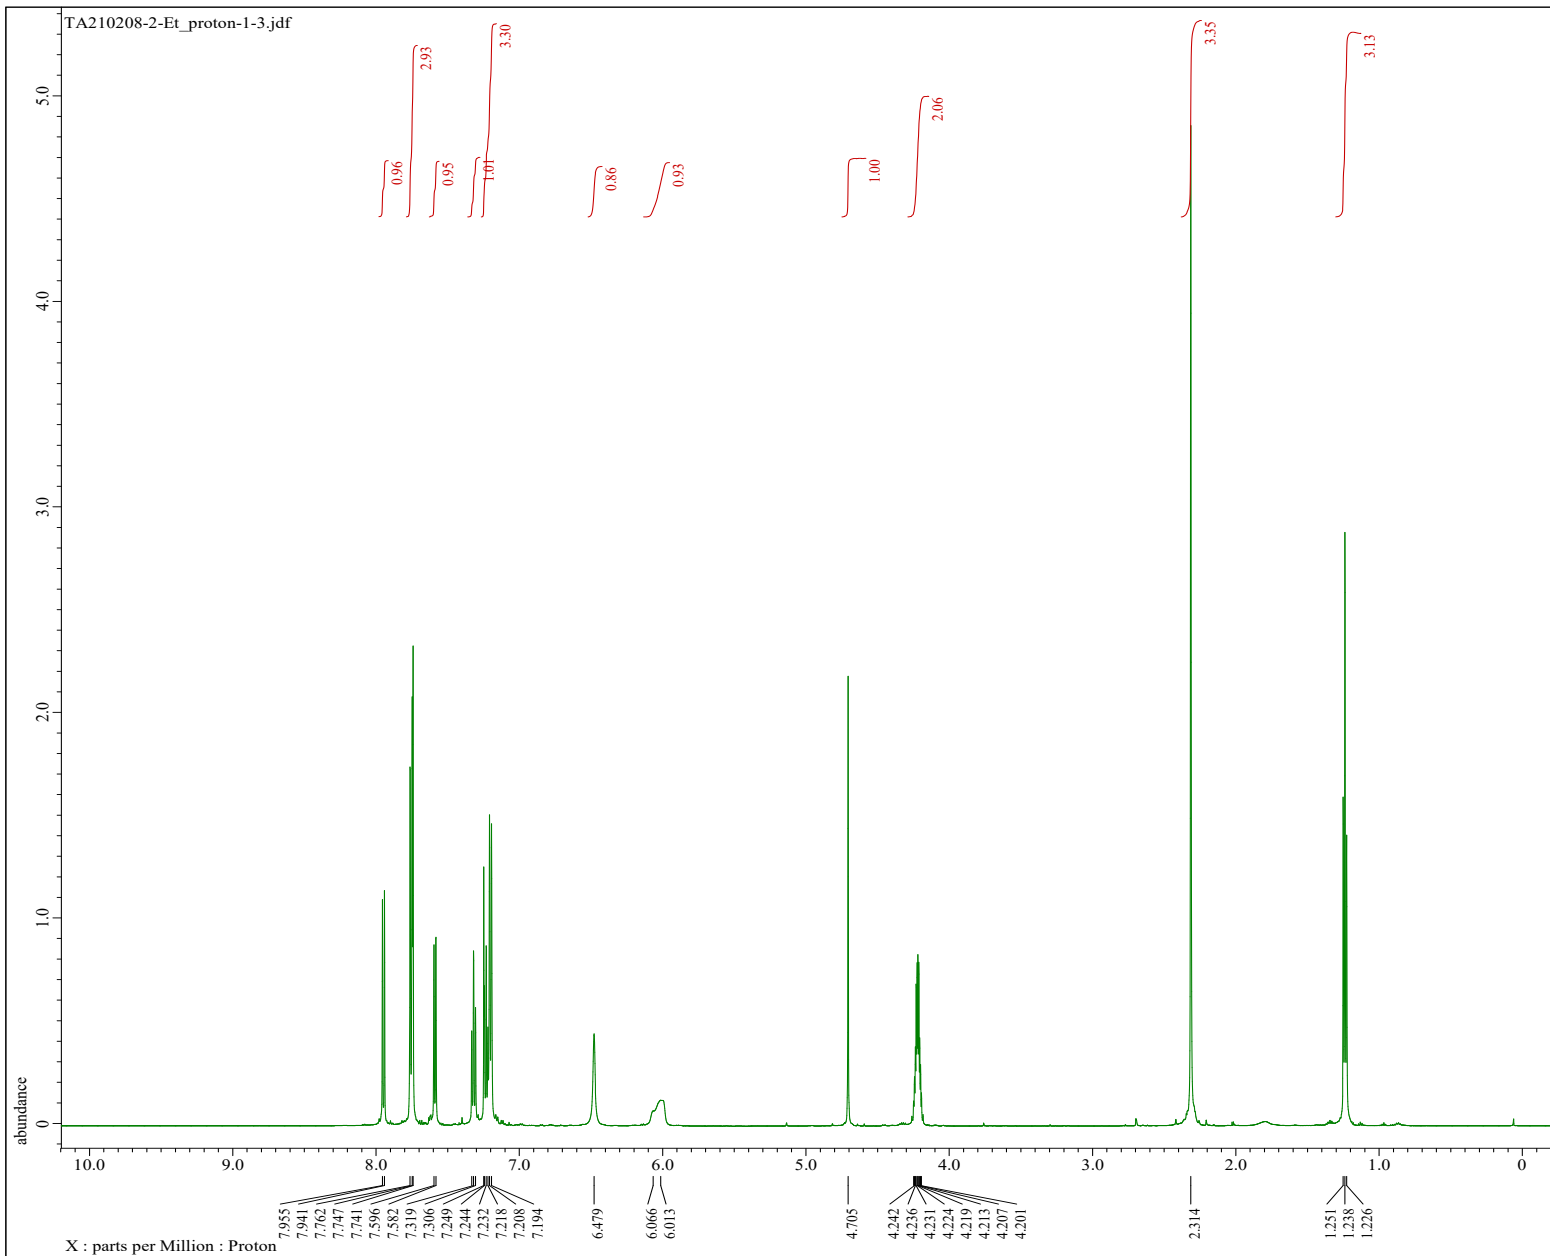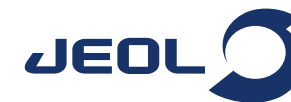

```

Filename      = TA210208-2-Et_proton-
Author        = delta
Experiment    = proton.jxp
Sample_Id     = TA210208-2-Et
Solvent       = CHLOROFORM-D
Actual_Start_Time = 8-FEB-2021 21:39:14
Revision_Time  = 8-FEB-2021 22:38:27

Comment       = Et-ester
Data_Format   = 1D COMPLEX
Dim_Size      = 13107
X_Domain      = Proton
Dim_Title     = Proton
Dim_Units     = [ppm]
Dimensions    = X
Spectrometer  = JNM-ECP600R/S3

Field_Strength = 14.09636928[T] (600[M
X_Acq_Duration = 1.09051904[s]
X_Domain       = Proton
X_Freq         = 600.1723046[MHz]
X_Offset       = 5[ppm]
X_Points       = 16384
X_Prescans     = 1
X_Resolution   = 0.91699454[Hz]
X_Sweep        = 15.02403846[kHz]
X_Sweep_Clipped = 12.01923077[kHz]
Irr_Domain     = Proton
Irr_Freq       = 600.1723046[MHz]
Irr_Offset     = 5[ppm]
Tri_Domain     = Proton
Tri_Freq       = 600.1723046[MHz]
Tri_Offset     = 5[ppm]
Blanking       = 5[us]
Clipped        = FALSE
Scans          = 16
Total_Scans    = 16

Relaxation_Delay = 5[s]
Recvr_Gain       = 36
Temp_Get         = 20[dc]
X_90_Width      = 9.5[us]
X_Acq_Time      = 1.09051904[s]
X_Angle         = 45[deg]
X_Atn           = 8.1[dB]
X_Pulse         = 4.75[us]
Irr_Mode        = Off
Tri_Mode        = Off
Dante_Loop      = 500
Dante_Presat    = FALSE
Decimation_Rate = 0
Experiment_Path = c:\Program Files\JEOL
Initial_Wait    = 1[s]
Phase           = {0, 90, 270, 180, 180
Presat_Time     = 5[s]
Presat_Time_Flag = FALSE
Relaxation_Delay_Calc = 0[s]
Relaxation_Delay_Temp = 5[s]
Repetition_Time = 6.09051904[s]
  
```

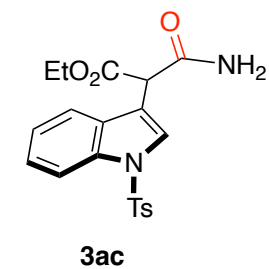

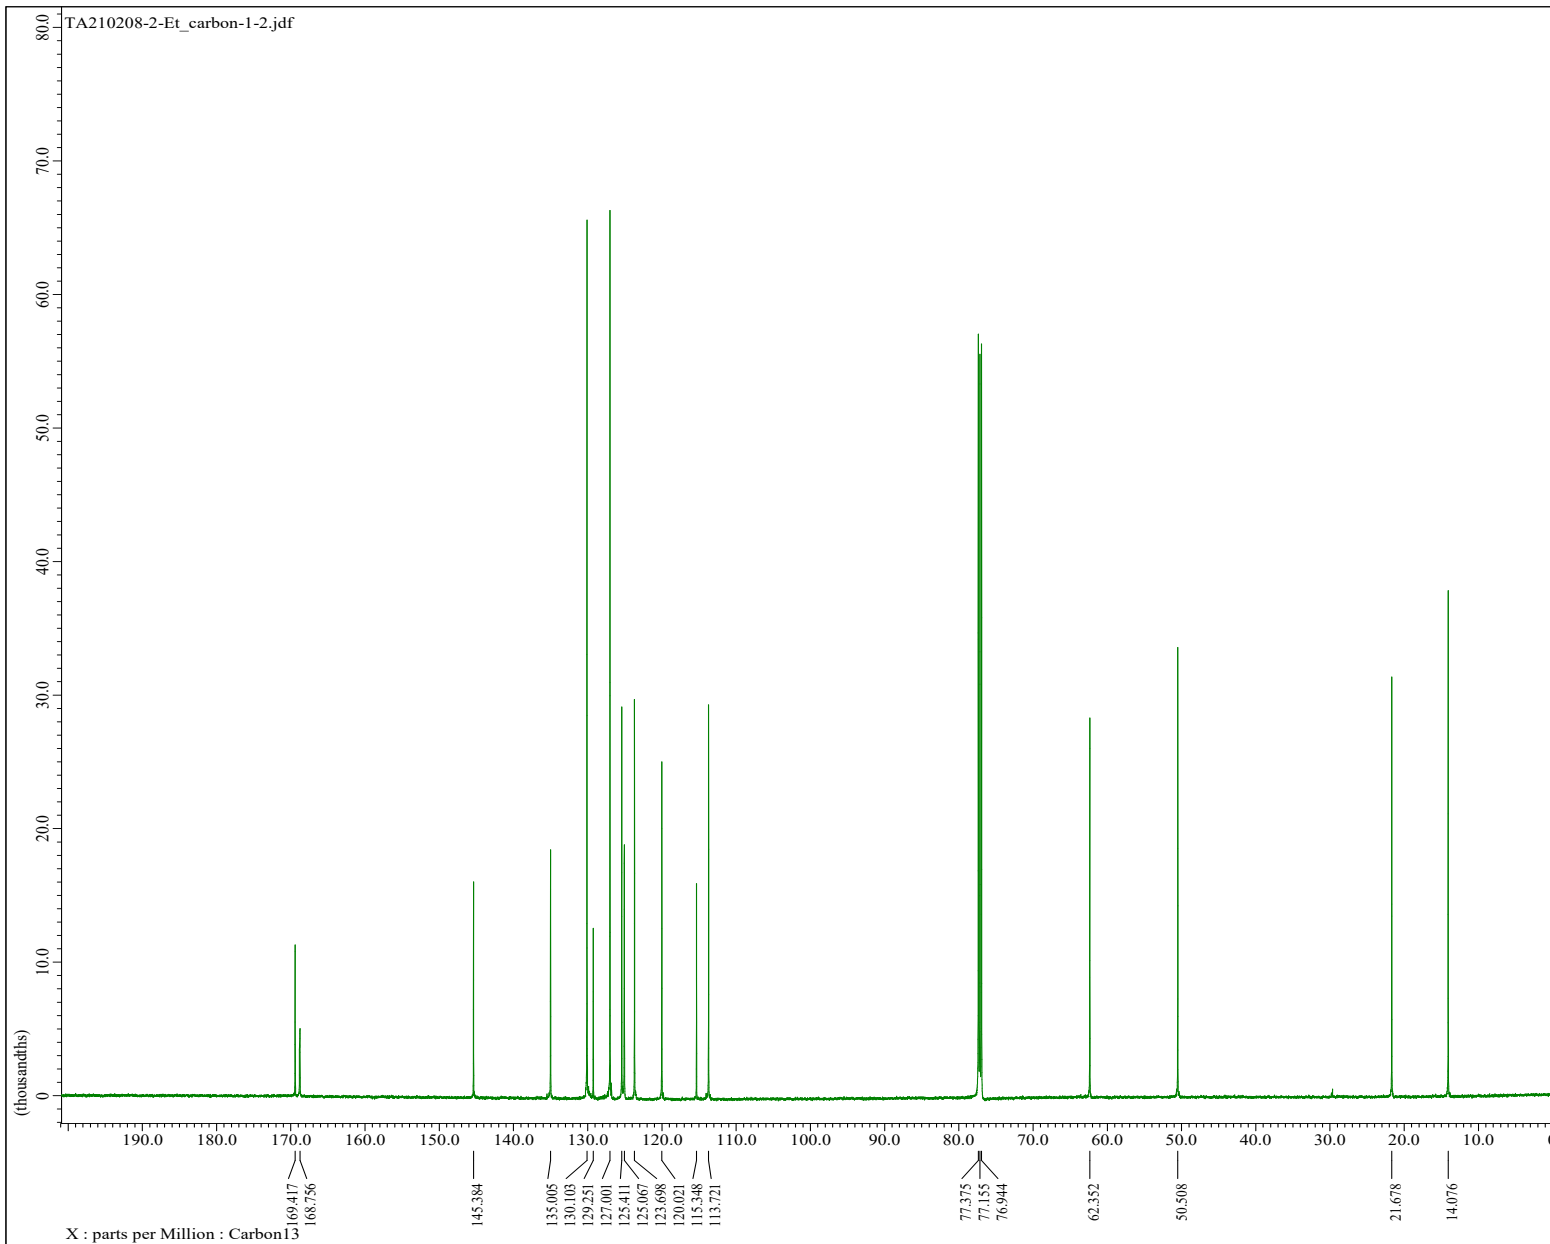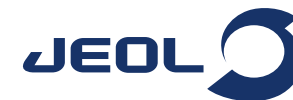

```

Filename      = TA210208-2-Et_carb
Author        = delta
Experiment    = carbon_jxp
Sample_Id     = TA210208-2-Et
Solvent       = CHLOROFORM-D
Actual_Start_Time = 8-FEB-2021 21:43:
Revision_Time = 8-FEB-2021 22:30:

Comment       = Et-ester
Data_Format   = 1D COMPLEX
Dim_Size      = 26214
X_Domain     = Carbon13
Dim_Title    = Carbon13
Dim_Units    = [ppm]
Dimensions   = X
Spectrometer  = JNM-ECZ600R/S3

Field_Strength = 14.09636928 [T] (60
X_Acq_Duration = 0.69206016 [s]
X_Domain     = Carbon13
X_Freq       = 150.91343039 [MHz]
X_Offset     = 100 [ppm]
X_Points     = 32768
X_Prescans   = 4
X_Resolution = 1.44496109 [Hz]
X_Sweep      = 47.34848485 [kHz]
X_Sweep_Clippped = 37.87878788 [kHz]
Irr_Domain   = Proton
Irr_Freq     = 600.1723046 [MHz]
Irr_Offset   = 5 [ppm]
Blanking     = 15 [us]
Clipped      = TRUE
Scans        = 1500
Total_Scans  = 1500

Relaxation_Delay = 1 [s]
Recvr_Gain      = 56
Temp_Set       = 29.1 [dC]
X_90_Width     = 8.8 [us]
X_Acq_Time     = 0.69206016 [s]
X_Angle        = 30 [deg]
X_Atn         = 11 [dB]
X_Pulse        = 2.93333333 [us]
Irr_Atn_Dec    = 26.162 [dB]
Irr_Atn_Dec_Calc = 26.162 [dB]
Irr_Atn_Dec_Default_Calc = 26.162 [dB]
Irr_Atn_No     = 26.162 [dB]
Irr_Dec_Bandwidth_Hz = 7.23684211 [kHz]
Irr_Dec_Bandwidth_Ppm = 12.05794078 [ppm]
Irr_Dec_Freq   = 600.1723046 [MHz]
Irr_Dec_Merit_Factor = 2.2
Irr_Decoupling = TRUE
Irr_Noise     = TRUE
Irr_Noise     = WALTZ
Irr_Offset_Default = 5 [ppm]
Irr_Pwidth    = 76 [us]
Irr_Pwidth_Default = 76 [us]
Irr_Pwidth_Default_Calc = 76 [us]
Irr_Pwidth_Templ = 76 [us]
Irr_Wurst     = FALSE
Decimation_Rate = 0
Experiment_Path = c:\Program Files\J
Initial_Wait   = 1 [s]
Noe_Time       = 1 [s]
Noe_Time_Flag = FALSE
Relaxation_Delay_Calc = 0 [s]
Relaxation_Delay_Temp = 1 [s]
Repetition_Time = 1.69206016 [s]

```

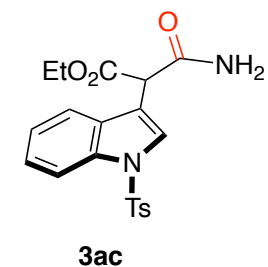

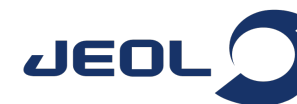

Filename = TA201215-1\_PROTON-1-4  
Author = delta  
Experiment = proton.jxp  
Sample\_Id = TA201215-1  
Solvent = CHLOROFORM-D  
Actual\_Start\_Time = 15-DEC-2020 20:33:04  
Revision\_Time = 15-DEC-2020 20:37:51

Data Format = 1D COMPLEX  
Dim\_Size = 26214  
X\_Domain = Proton  
Dim\_Title = Proton  
Dim\_Units = [ppm]  
Dimensions = X  
Spectrometer = JNM-ECZ600R/S3

Field\_Strength = 14.09636928 [T] (600 [M])  
X\_Acq\_Duration = 2.90455552 [s]  
X\_Domain = Proton  
X\_Freq = 600.1723046 [MHz]  
X\_Offset = 5 [ppm]  
X\_Points = 32768  
X\_Prescans = 0  
X\_Resolution = 0.34428676 [Hz]  
X\_Sweep = 11.28158845 [kHz]  
X\_Sweep\_Clippped = 9.02527076 [kHz]  
Irr\_Domain = Proton  
Irr\_Freq = 600.1723046 [MHz]  
Irr\_Offset = 5 [ppm]  
Tri\_Domain = Proton  
Tri\_Freq = 600.1723046 [MHz]  
Tri\_Offset = 5 [ppm]  
Blanking = 5 [us]  
Clipped = FALSE  
Scans = 16  
Total\_Scans = 16

Relaxation\_Delay = 4 [s]  
Recvr\_Gain = 42  
Temp\_Get = 20.7 [dC]  
X\_90\_Width = 9.5 [us]  
X\_Acq\_Time = 2.90455552 [s]  
X\_Angle = 45 [deg]  
X\_Atn = 8.1 [dB]  
X\_Pulse = 4.75 [us]  
Irr\_Mode = Off  
Tri\_Mode = Off  
Dante\_Loop = 400  
Dante\_Presat = FALSE  
Decimation\_Rate = 0  
Experiment\_Path = c:\Program Files\JEOL  
Initial\_Wait = 1 [s]  
Phase = (0, 90, 270, 180, 180)  
Presat\_Time = 4 [s]  
Presat\_Time\_Flag = FALSE  
Relaxation\_Delay\_Calc = 0 [s]  
Relaxation\_Delay\_Temp = 4 [s]  
Repetition\_Time = 6.90455552 [s]

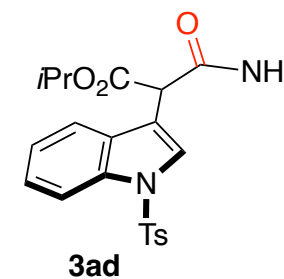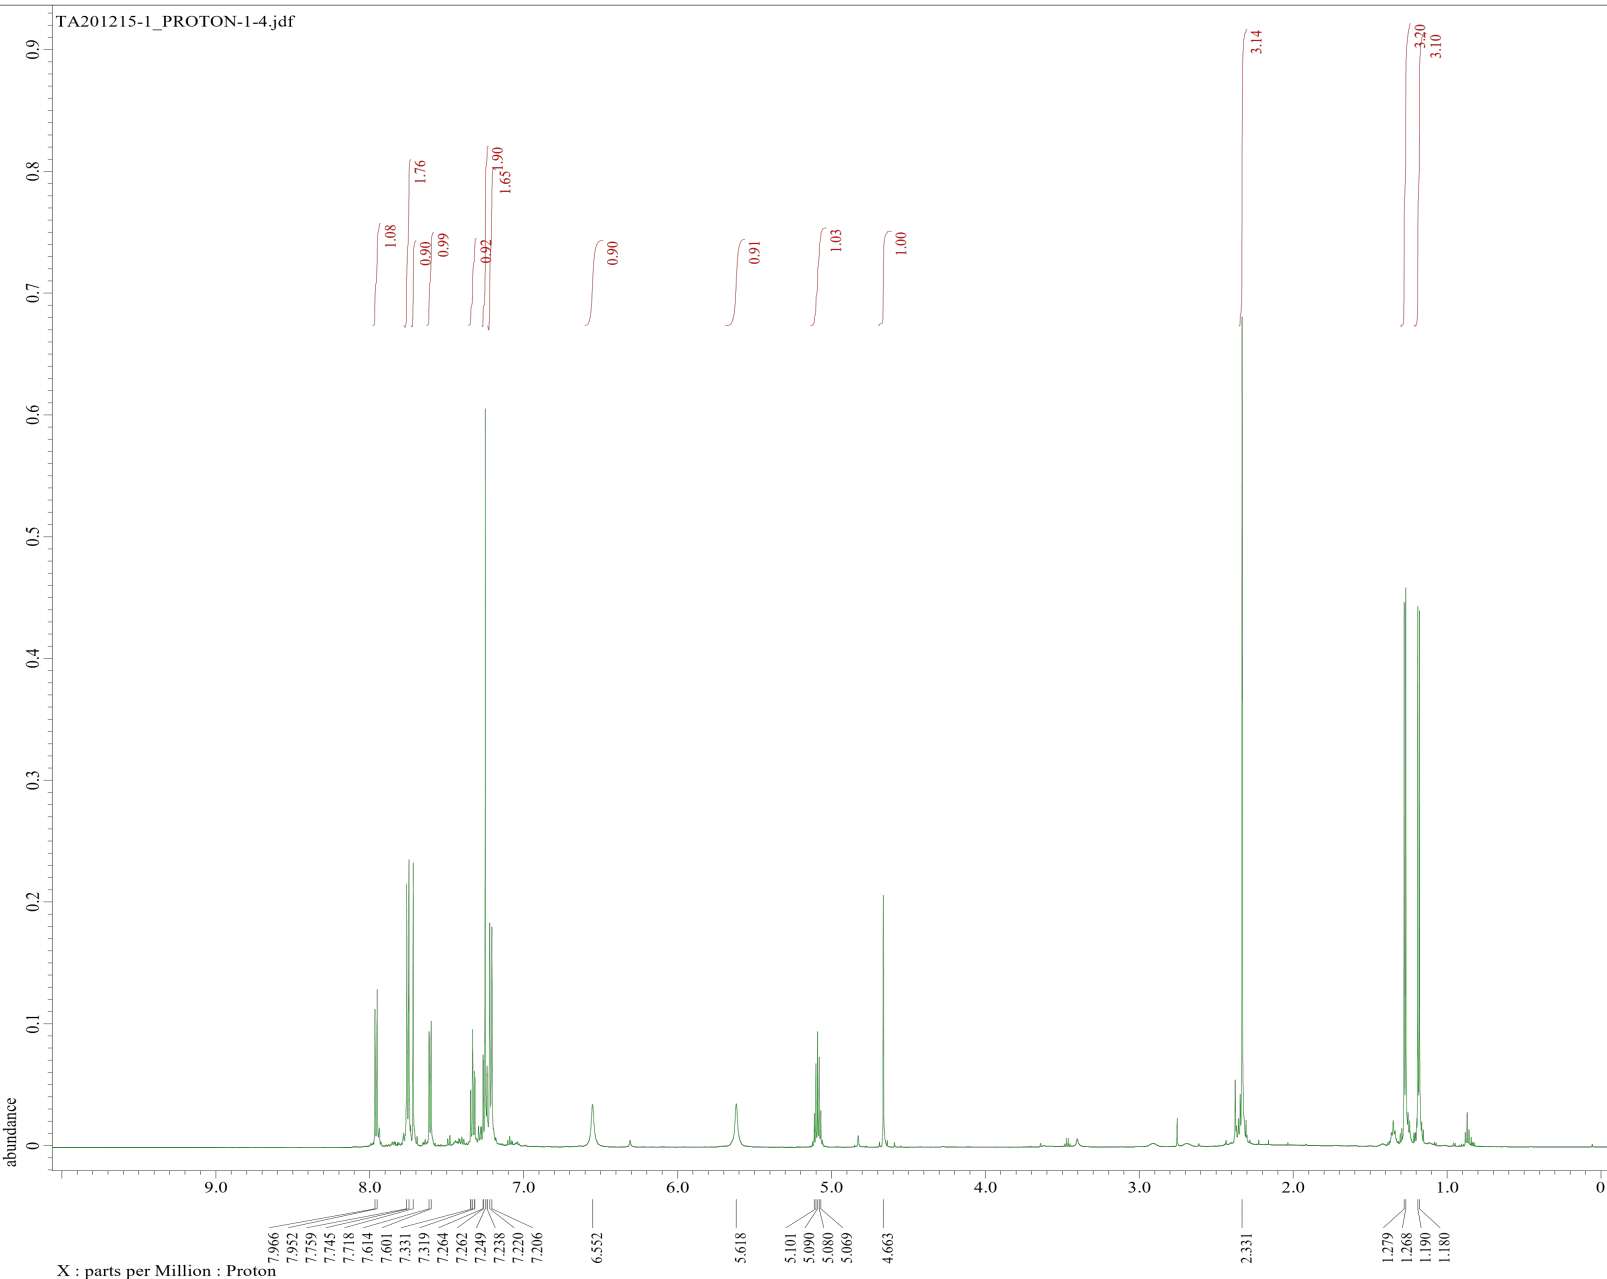



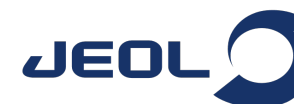

Filename = TA201215-1\_carbon-  
Author = delta  
Experiment = carbon.jxp  
Sample\_Id = TA201215-1  
Solvent = CHLOROFORM-D  
Actual\_Start\_Time = 15-DEC-2020 20:37:  
Revision\_Time = 15-DEC-2020 22:25:

Comment = single pulse decou  
Data\_Format = 1D COMPLEX  
Dim\_Size = 26214  
X\_Domain = Carbon13  
Dim\_Title = Carbon13  
Dim\_Units = [ppm]  
Dimensions = X  
Spectrometer = JNM-ECZ600R/S3

Field\_Strength = 14.09636928[T] (60  
X\_Acq\_Duration = 0.69206016[s]  
X\_Domain = Carbon13  
X\_Freq = 150.91343039[MHz]  
X\_Offset = 100[ppm]  
X\_Points = 32768  
X\_Prescans = 4  
X\_Resolution = 1.44496109[Hz]  
X\_Sweep = 47.34848485[kHz]  
X\_Sweep\_Clipped = 37.87878788[kHz]  
IR\_Domain = Proton  
IR\_Freq = 600.1723046[MHz]  
IR\_Offset = 5[ppm]  
Blanking = 15[us]  
Clipped = FALSE  
Scans = 3000  
Total\_Scans = 3000

Relaxation\_Delay = 1[s]  
Recvr\_Gain = 56  
Temp\_Get = 20.9[dc]  
X\_90\_Width = 8.8[us]  
X\_Acq\_Time = 0.69206016[s]  
X\_Angle = 30[deg]  
X\_Atn = 11[db]  
X\_Pulse = 2.93333333[us]  
IR\_Atn\_Dec = 26.162[db]  
IR\_Atn\_Dec\_Calc = 26.162[db]  
IR\_Atn\_Dec\_Default\_Calc = 26.162[db]  
IR\_Atn\_No = 26.162[db]  
IR\_Dec\_Bandwidth\_Hz = 7.23684211[kHz]  
IR\_Dec\_Bandwidth\_Ppm = 12.05794078[ppm]  
IR\_Dec\_Freq = 600.1723046[MHz]  
IR\_Dec\_Merit\_Factor = 2.2  
IR\_Decoupling = TRUE  
IR\_No = TRUE  
IR\_Noise = WAJSE  
IR\_Offset\_Default = 5[ppm]  
IR\_Pwidth = 76[us]  
IR\_Pwidth\_Default = 76[us]  
IR\_Pwidth\_Default\_Calc = 76[us]  
IR\_Pwidth\_Templ = 76[us]  
IR\_Wurst = FALSE  
Decimation\_Rate = 0  
Experiment\_Path = c:\Program Files\J  
Initial\_Wait = 1[s]  
Noe\_Time = 1[s]  
Noe\_Time\_Flag = FALSE  
Relaxation\_Delay\_Calc = 0[s]  
Relaxation\_Delay\_Temp = 1[s]  
Repetition\_Time = 1.69206016[s]

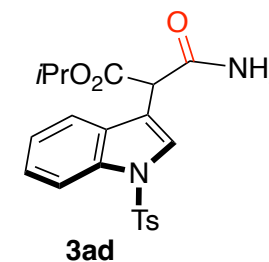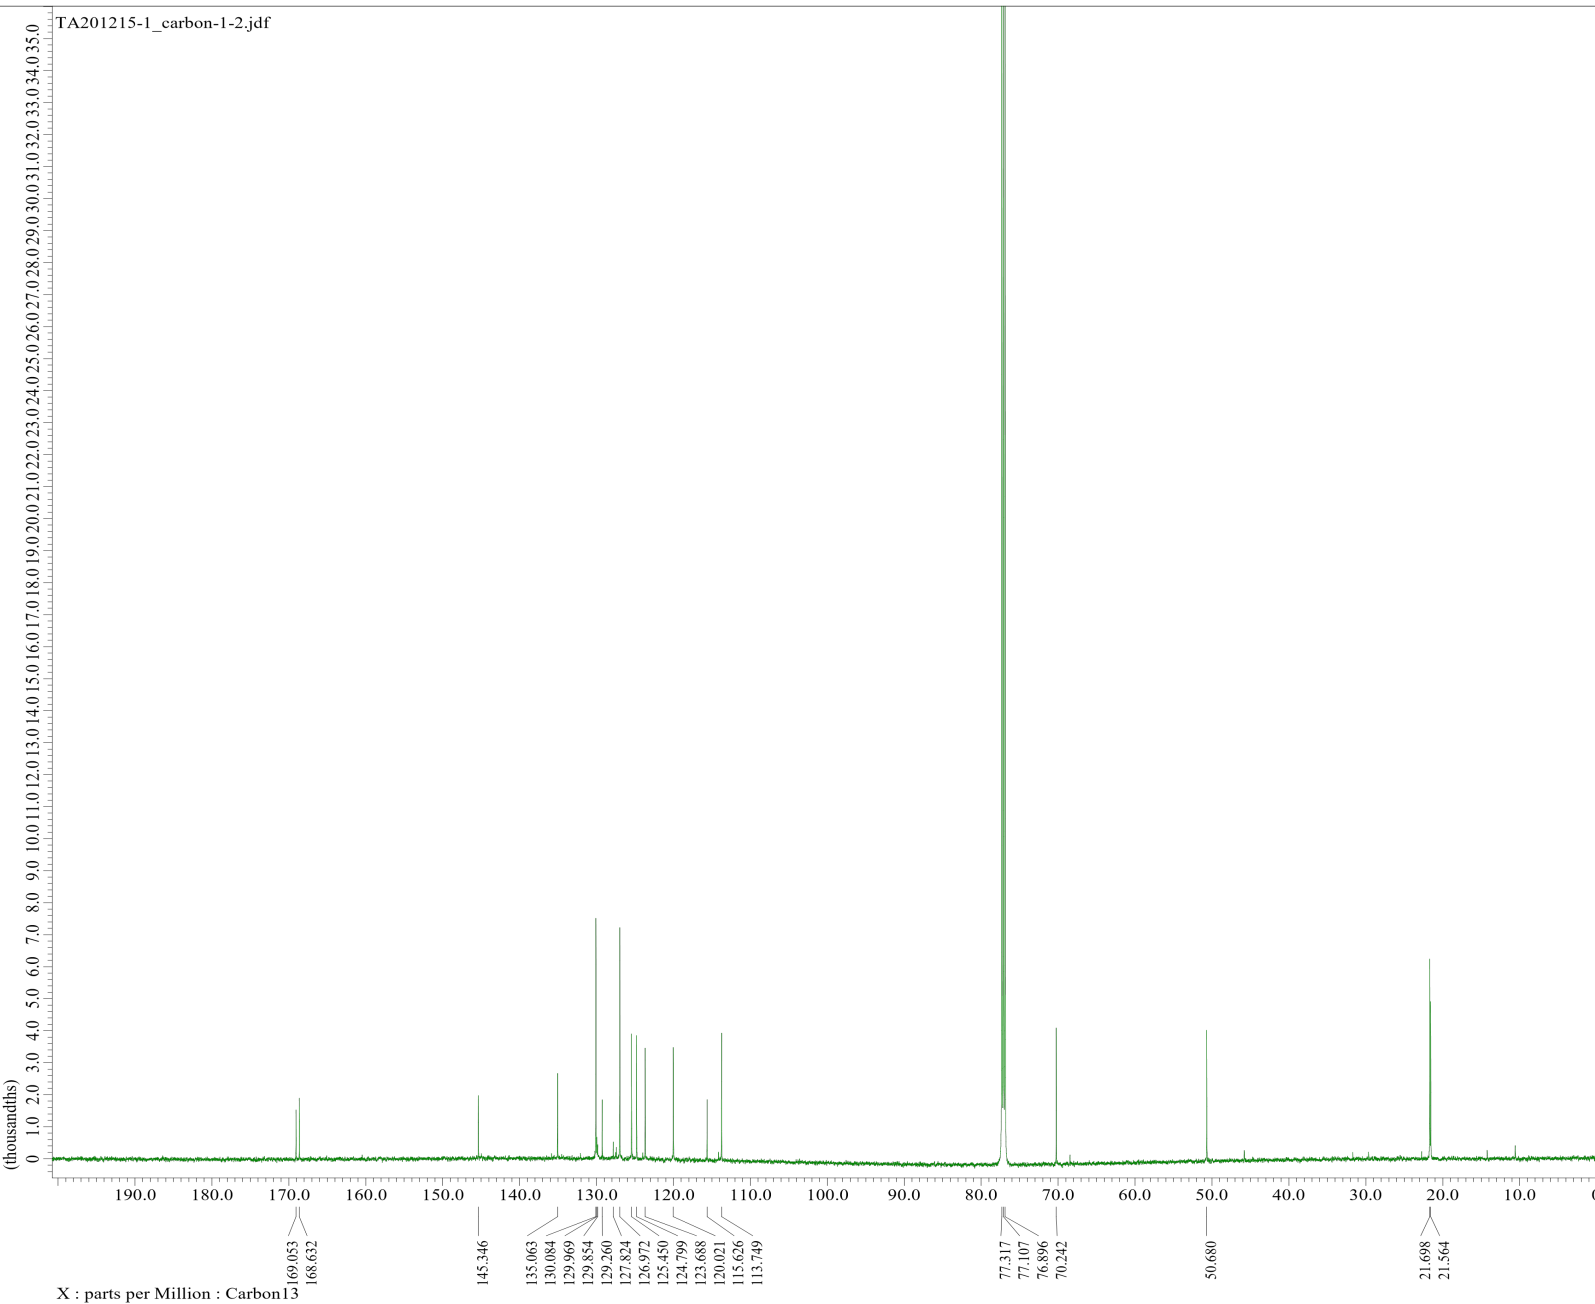

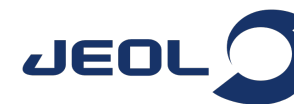

Filename = TA210105-2-1H\_proton-  
Author = delta  
Experiment = proton\_3xp  
Sample\_Id = TA210105-2-1H  
Solvent = CHLOROFORM-D  
Actual\_Start\_Time = 5-JAN-2021 21:14:52  
Revision\_Time = 5-JAN-2021 21:23:34

Comment = single\_pulse-EtOCH2CH  
Data\_Format = 1D COMPLEX  
Dim\_Size = 13107  
X\_Domain = Proton  
Dim\_Title = Proton  
Dim\_Units = [ppm]  
Dimensions = X  
Spectrometer = JNM-ECZ600R/S3

Field\_Strength = 14.09636928[T] (600[M  
X\_Acq\_Duration = 1.4548992[s]  
X\_Domain = Proton  
X\_Freq = 600.1723046[MHz]  
X\_Offset = 5[ppm]  
X\_Points = 16384  
X\_Prescans = 1  
X\_Resolution = 0.68733284[Hz]  
X\_Sweep = 11.26126126[Hz]  
X\_Sweep\_Clipped = 9.00900901[Hz]  
Irr\_Domain = Proton  
Irr\_Freq = 600.1723046[MHz]  
Irr\_Offset = 5[ppm]  
Tri\_Domain = Proton  
Tri\_Freq = 600.1723046[MHz]  
Tri\_Offset = 5[ppm]  
Blanking = 5[us]  
Clipped = FALSE  
Scans = 16  
Total\_Scans = 16

Relaxation\_Delay = 5[s]  
Recvr\_Gain = 56  
Temp\_Get = 20.4[dc]  
X\_90\_Width = 9.5[us]  
X\_Acq\_Time = 1.4548992[s]  
X\_Angle = 45[deg]  
X\_Atn = 8.1[dB]  
X\_Pulse = 4.75[us]  
Irr\_Mode = Off  
Tri\_Mode = Off  
Dante\_Loop = 500  
Dante\_Presat = FALSE  
Decimation\_Rate = 0  
Experiment\_Path = c:\Program Files\JEOL  
Initial\_Wait = 1[s]  
Phase = {0, 90, 270, 180, 180  
Presat\_Time = 5[s]  
Presat\_Time\_Flag = FALSE  
Relaxation\_Delay\_Calc = 0[s]  
Relaxation\_Delay\_Temp = 5[s]  
Repetition\_Time = 6.4548992[s]

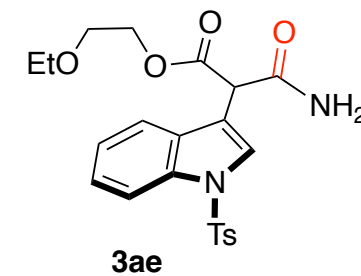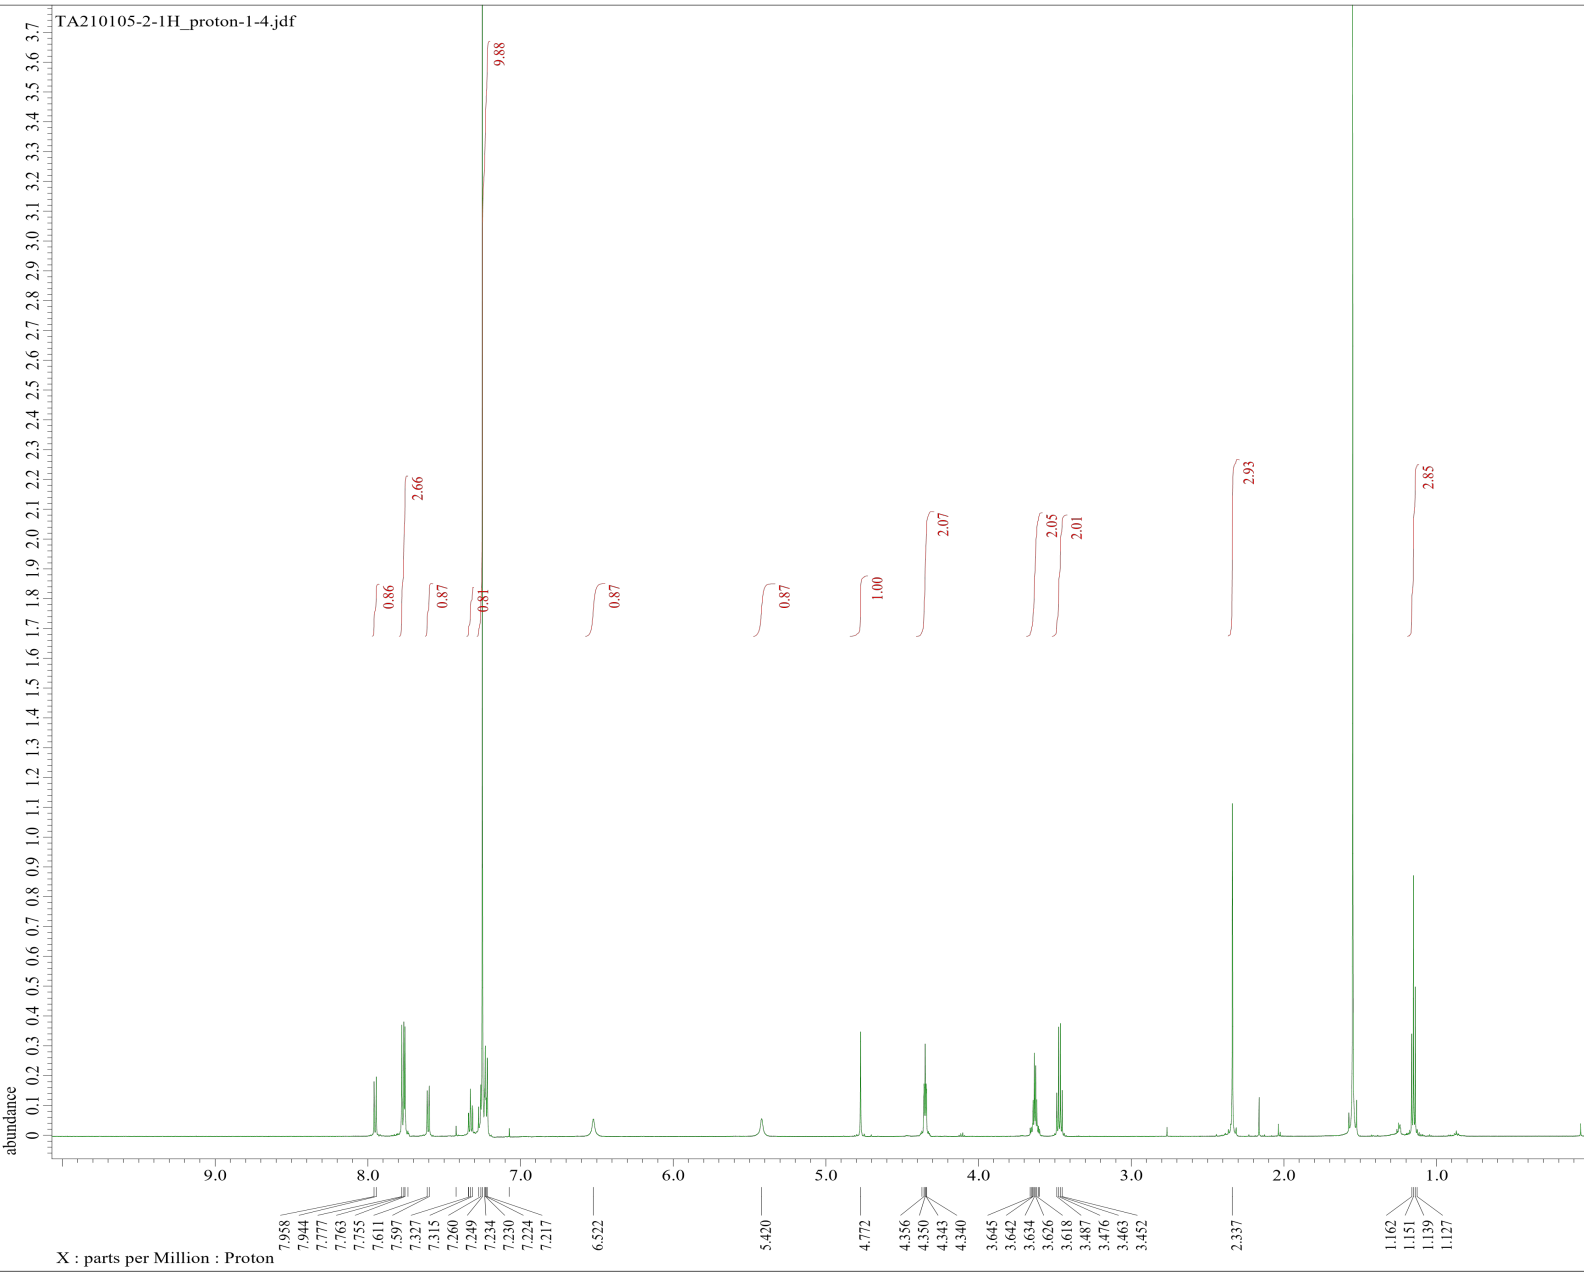

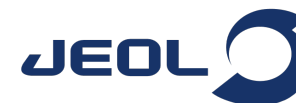

Filename = TA210105-2-13C\_car  
 Author = delta  
 Experiment = carbon.jxp  
 Sample\_Id = TA210105-2-13C  
 Solvent = CHLOROFORM-D  
 Actual\_Start\_Time = 5-JAN-2021 21:31:  
 Revision\_Time = 6-JAN-2021 08:10:

Comment = single pulse decou  
 Data\_Format = 1D COMPLEX  
 Dim\_Size = 26214  
 X\_Domain = Carbon13  
 Dim\_Title = Carbon13  
 Dim\_Units = [ppm]  
 Dimensions = X  
 Spectrometer = JNM-ECZ600R/S3

Field\_Strength = 14.09636928 [T] (60  
 X\_Acq\_Duration = 0.69206016 [s]  
 X\_Domain = Carbon13  
 X\_Freq = 150.91343039 [MHz]  
 X\_Offset = 100 [ppm]  
 X\_Points = 32768  
 X\_Prescans = 4  
 X\_Resolution = 1.44496109 [Hz]  
 X\_Sweep = 47.34848485 [kHz]  
 X\_Sweep\_Clipped = 37.87878788 [kHz]  
 Irr\_Domain = Proton  
 Irr\_Freq = 600.1723046 [MHz]  
 Irr\_Offset = 5 [ppm]  
 Blanking = 15 [us]  
 Clipped = FALSE  
 Scans = 7000  
 Total\_Scans = 7000

Relaxation\_Delay = 1 [s]  
 Recvr\_Gain = 46  
 Temp\_Get = 19.7 [dC]  
 X\_90\_Width = 8.8 [us]  
 X\_Acq\_Time = 0.69206016 [s]  
 X\_Angle = 30 [deg]  
 X\_Attn = 11 [dB]  
 X\_Pulse = 2.93333333 [us]  
 Irr\_Atn\_Dec = 26.162 [dB]  
 Irr\_Atn\_Dec\_Calc = 26.162 [dB]  
 Irr\_Atn\_Dec\_Default\_Calc = 26.162 [dB]  
 Irr\_Atn\_Noise = 26.162 [dB]  
 Irr\_Dec\_Bandwidth\_Hz = 7.23684211 [kHz]  
 Irr\_Dec\_Bandwidth\_Ppm = 12.05794078 [ppm]  
 Irr\_Dec\_Freq = 600.1723046 [MHz]  
 Irr\_Dec\_Merit\_Factor = 2.2  
 Irr\_Decoupling = TRUE  
 Irr\_Noise = TRUE  
 Irr\_Noise = WALTZ  
 Irr\_Offset\_Default = 5 [ppm]  
 Irr\_Pwidth = 76 [us]  
 Irr\_Pwidth\_Default = 76 [us]  
 Irr\_Pwidth\_Default\_Calc = 76 [us]  
 Irr\_Pwidth\_Temp1 = 76 [us]  
 Irr\_Wurst = FALSE  
 Decimation\_Rate = 0  
 Experiment\_Path = c:\Program Files\J  
 Initial\_Wait = 1 [s]  
 Noe\_Time = 1 [s]  
 Noe\_Time\_Flag = FALSE  
 Relaxation\_Delay\_Calc = 0 [s]  
 Relaxation\_Delay\_Temp = 1 [s]  
 Repetition\_Time = 1.69206016 [s]

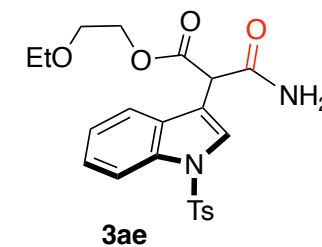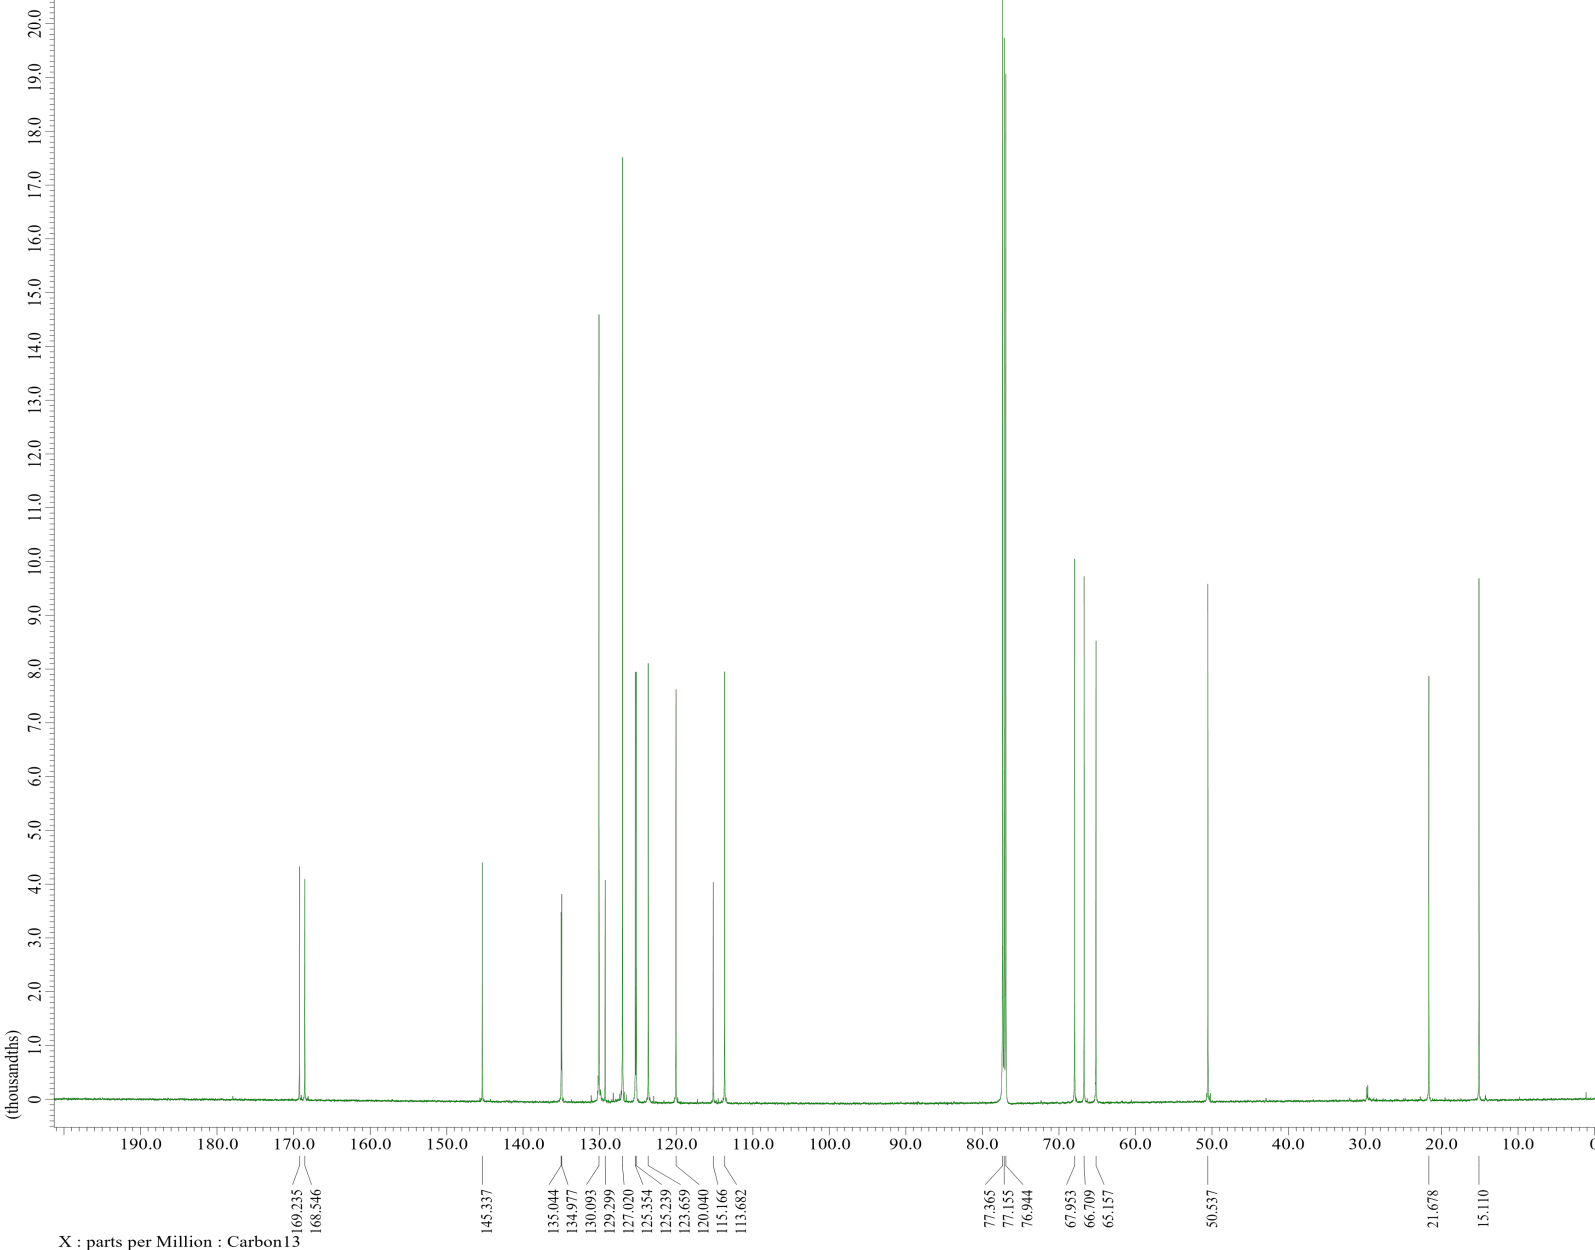

```

Filename      = TA201218-1H_proton-1-
Author       = delta
Experiment   = proton.jxp
Sample_Id    = TA201218-1H
Solvent      = DMSO-D6
Actual_Start_Time = 18-DEC-2020 14:06:33
Revision_Time  = 18-DEC-2020 14:18:20

Comment      = single pulse-PhSO2-
Data_Format  = 1D COMPLEX
Dim_Size     = 13107
X_Domain     = Proton
Dim_File     = Proton
Dim_Units    = [ppm]
Dimensions   = X
Spectrometer = JNM-ECZ600R/S3

Field_Strength = 14.09636928[T] (600[M]
X_Acq_Duration = 1.09051904[s]
X_Domain       = Proton
X_Freq         = 600.1723046[MHz]
X_Offset       = 5[ppm]
X_Points       = 16384
X_Prescans     = 1
X_Resolution   = 0.91699454[Hz]
X_Sweep        = 15.02403846[kHz]
X_Sweep_Clipped = 12.01923077[kHz]
Irr_Domain     = Proton
Irr_Freq       = 600.1723046[MHz]
Irr_Offset     = 5[ppm]
Tri_Domain     = Proton
Tri_Freq       = 600.1723046[MHz]
Tri_Offset     = 5[ppm]
Blanking       = 5[us]
Clipped        = FALSE
Scans          = 16
Total_Scans    = 16

Relaxation_Delay = 5[s]
Recvr_Gain       = 36
Temp_Get         = 20.4[dc]
X_90_Width      = 9.5[us]
X_Acq_Time      = 1.09051904[s]
X_Angle         = 45[deg]
X_Atn           = 8.1[db]
X_Pulse         = 4.75[us]
Irr_Mode        = Off
Tri_Mode        = Off
Dante_Loop      = 500
Dante_Preset    = FALSE
Decimation_Rate = 0
Experiment_Path = c:\Program Files\JEOL
Initial_Wait    = 1[s]
Phase           = {0, 90, 270, 180, 180}
Preset_Time     = 5[s]
Preset_Time_Flag = FALSE
Relaxation_Delay_Calc = 0[s]
Relaxation_Delay_Temp = 5[s]
Repetition_Time = 6.09051904[s]
  
```

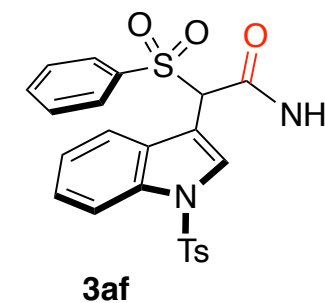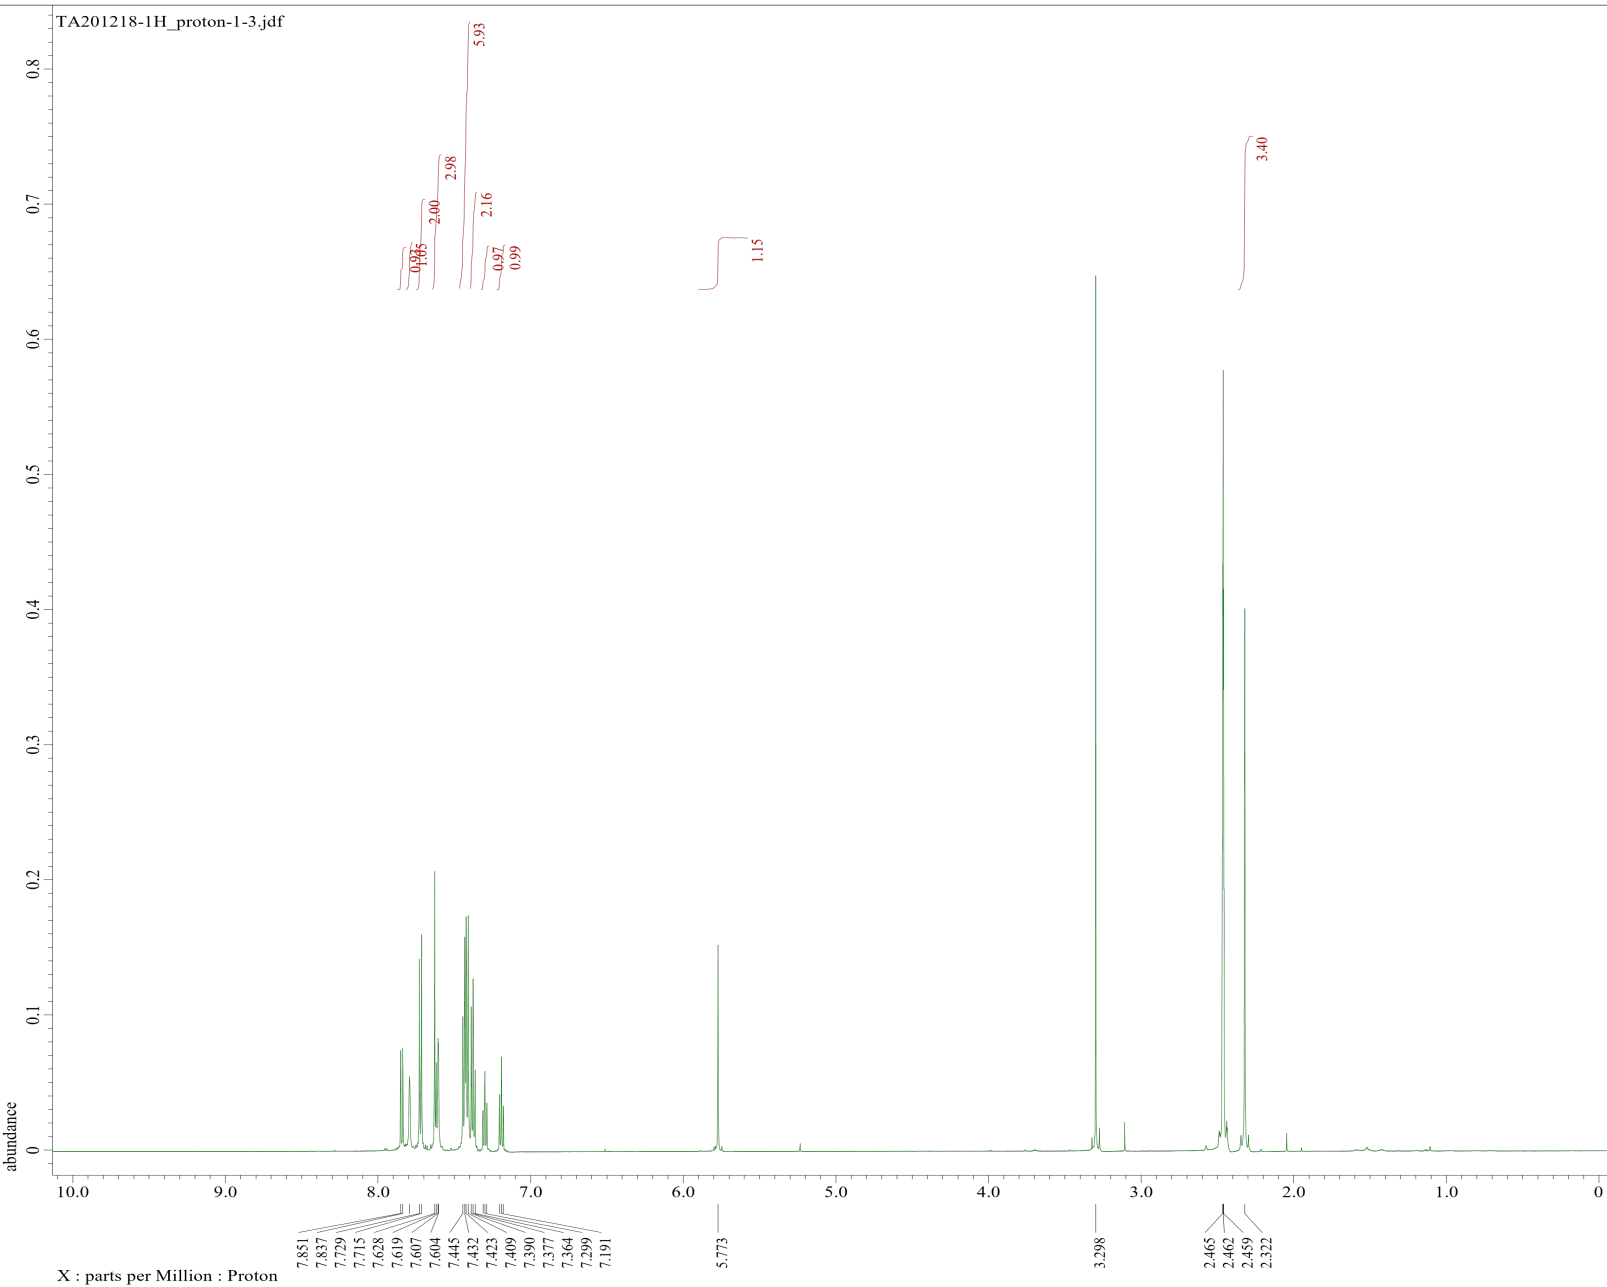

TA201218-13C\_carbon-1-2.jdf

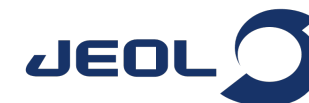

```

Filename           = TA201218-13C_carbo
Author            = delta
Experiment        = carbon.jxp
Sample_Id         = TA201218-13C
Solvent           = DMSO-D6
Actual_Start_Time = 18-DEC-2020 14:14:
Revision_Time     = 18-DEC-2020 15:14:

Comment          = single pulse decou
Data_Format      = 1D COMPLEX
Dim_Size         = 26214
X_Domain         = Carbon13
Dim_Title        = Carbon13
Dim_Units        = [ppm]
Dimensions       = X
Spectrometer     = JNM-ECZ600R/S3

Field_Strength   = 14.09636928[T] (60
X_Acq_Duration   = 0.69206016[s]
X_Domain         = Carbon13
X_Freq           = 150.91343039[MHz]
X_Offset         = 100[ppm]
X_Points         = 32768
X_Prescans       = 4
X_Resolution     = 1.44496109[Hz]
X_Sweep         = 47.34848485[kHz]
X_Sweep_Clipped = 37.87878788[kHz]
Irr_Domain       = Proton
Irr_Freq         = 600.1723046[MHz]
Irr_Offset       = 5[ppm]
Blanking         = 15[us]
Clipped          = FALSE
Scans            = 1800
Total_Scans     = 1800

Relaxation_Delay = 1[s]
Recvr_Gain       = 56
Temp_Get         = 20.5[dc]
X_90_Width      = 8.8[us]
X_Acq_Time       = 0.69206016[s]
X_Angle          = 30[deg]
X_Atn            = 11[db]
X_Pulse         = 2.93333333[us]
Irr_Atn_Dec     = 26.162[db]
Irr_Atn_Dec_Calc = 26.162[db]
Irr_Atn_Dec_Default_Calc = 26.162[db]
Irr_Atn_Noise   = 26.162[db]
Irr_Dec_Bandwidth_Hz = 7.23684211[kHz]
Irr_Dec_Bandwidth_Ppm = 12.05794078[ppm]
Irr_Dec_Freq    = 600.1723046[MHz]
Irr_Dec_Merit_Factor = 2.2
Irr_Decoupling  = TRUE
Irr_Noise       = TRUE
Irr_Noise       = WBLZ
Irr_Offset_Default = 5[ppm]
Irr_Pwidth      = 76[us]
Irr_Pwidth_Default = 76[us]
Irr_Pwidth_Default_Calc = 76[us]
Irr_Pwidth_Templ = 76[us]
Irr_Wurst       = FALSE
Decimation_Rate = 0
Experiment_Path  = c:\Program Files\J
Initial_Wait     = 1[s]
Noe_Time         = 1[s]
Noe_Time_Flag    = FALSE
Relaxation_Delay_Calc = 0[s]
Relaxation_Delay_Temp = 1[s]
Repetition_Time = 1.69206016[s]
    
```

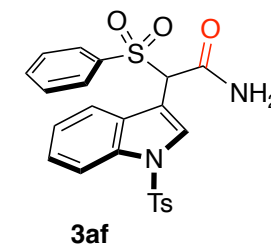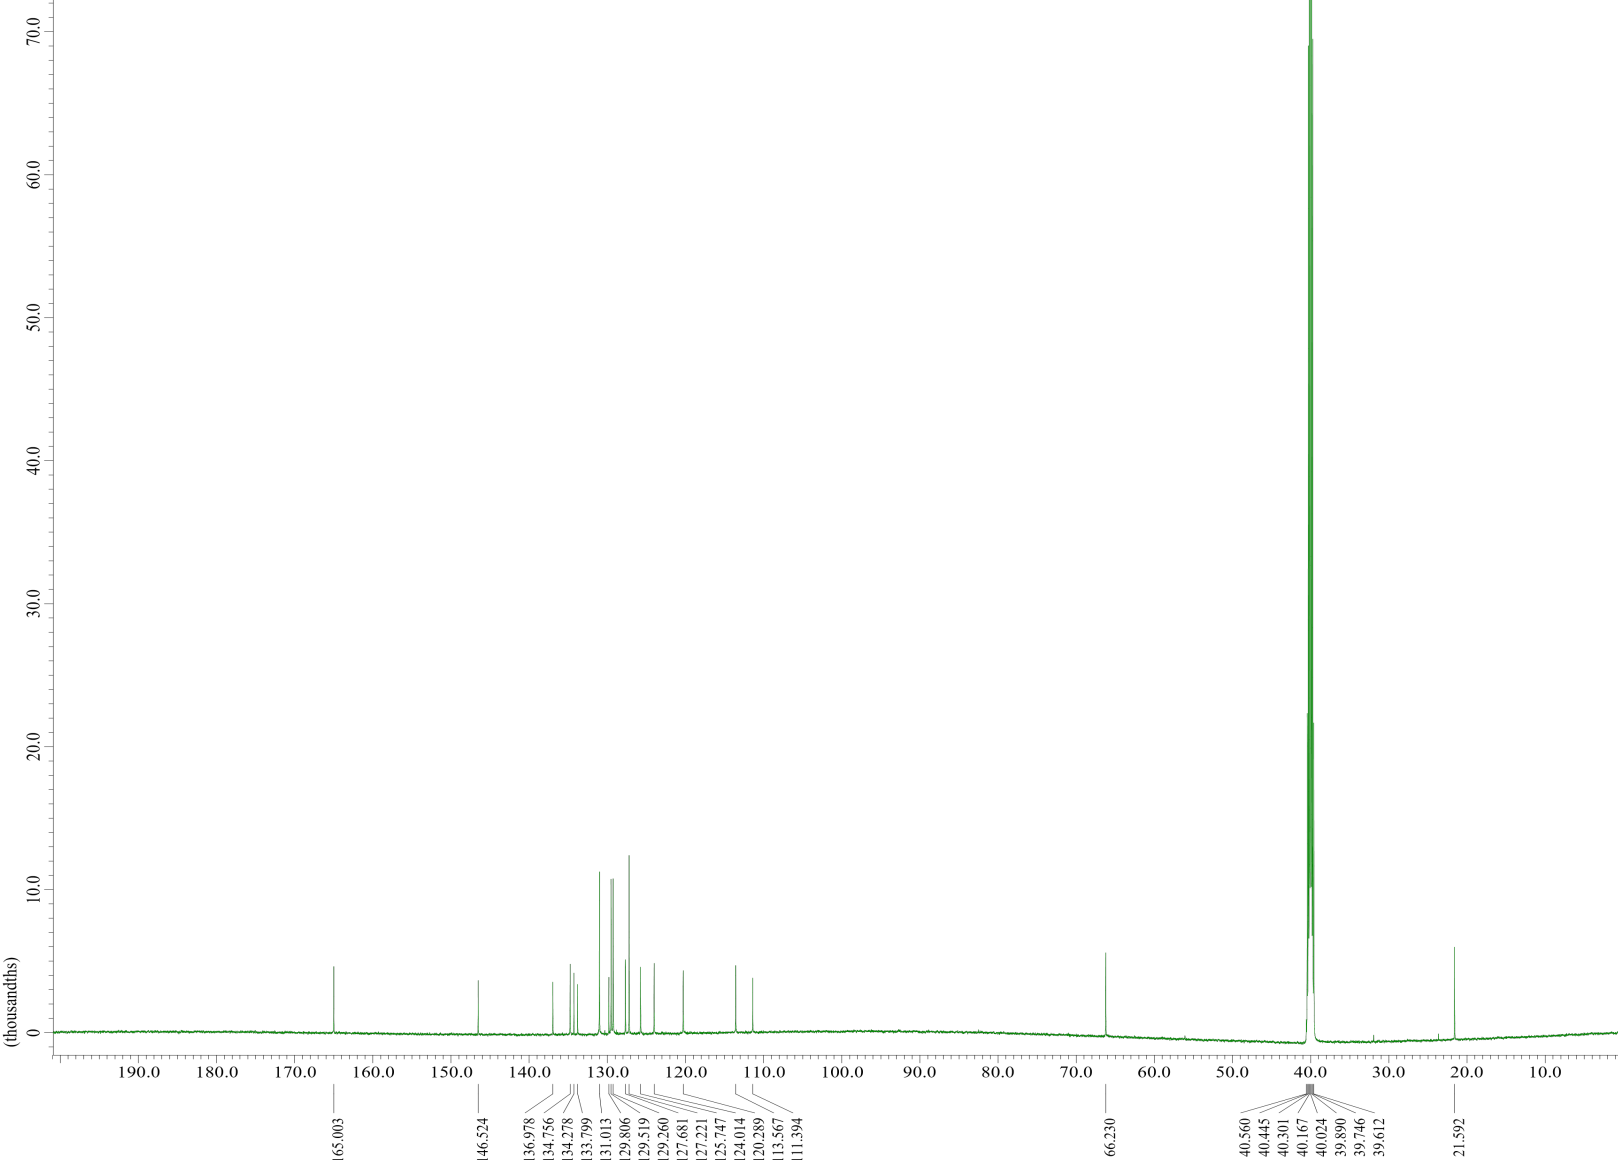

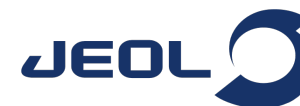

Filename = TA210105-1\_proton-1-3  
Author = delta  
Experiment = proton.jxp  
Sample\_Id = TA210105-1  
Solvent = CHLOROFORM-D  
Actual\_Start\_Time = 5-JAN-2021 21:08:10  
Revision\_Time = 5-JAN-2021 21:26:27

Comment = single\_pulse-a-Ts-ind  
Data\_Format = 1D\_COMPLEX  
Dim\_Size = 13107  
X\_Domain = Proton  
Dim\_Title = Proton  
Dim\_Units = [ppm]  
Dimensions = X  
Spectrometer = JNM-ECZ600R/S3

Field\_Strength = 14.09636928[T] (600[M]  
X\_Acq\_Duration = 1.4548992[s]  
X\_Domain = Proton  
X\_Freq = 600.1723046[MHz]  
X\_Offset = 5[ppm]  
X\_Points = 16384  
X\_Prescans = 1  
X\_Resolution = 0.69733284[Hz]  
X\_Sweep = 11.26126126[kHz]  
X\_Sweep\_Clipped = 9.00900901[kHz]  
Irr\_Domain = Proton  
Irr\_Freq = 600.1723046[MHz]  
Irr\_Offset = 5[ppm]  
Tri\_Domain = Proton  
Tri\_Freq = 600.1723046[MHz]  
Tri\_Offset = 5[ppm]  
Blanking = 5[us]  
Clipped = TRUE  
Scans = 16  
Total\_Scans = 16

Relaxation\_Delay = 5[s]  
Recvr\_Gain = 56  
Temp\_Get = 20.1[dc]  
X\_90\_Width = 9.5[us]  
X\_Acq\_Time = 1.4548992[s]  
X\_Angle = 45[deg]  
X\_Atn = 8.1[dB]  
X\_Pulse = 4.75[us]  
Irr\_Mode = Off  
Tri\_Mode = Off  
Dante\_Loop = 500  
Dante\_Preset = FALSE  
Decimation\_Rate = 0  
Experiment\_Path = c:\Program Files\JEOL  
Initial\_Wait = 1[s]  
Phase = {0, 90, 270, 180, 180  
Preset\_Time = 5[s]  
Preset\_Time\_Flag = FALSE  
Relaxation\_Delay\_Calc = 0[s]  
Relaxation\_Delay\_Temp = 5[s]  
Repetition\_Time = 6.4548992[s]

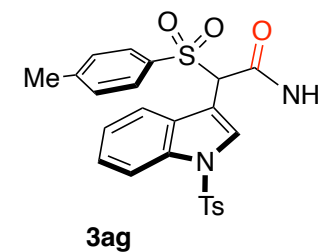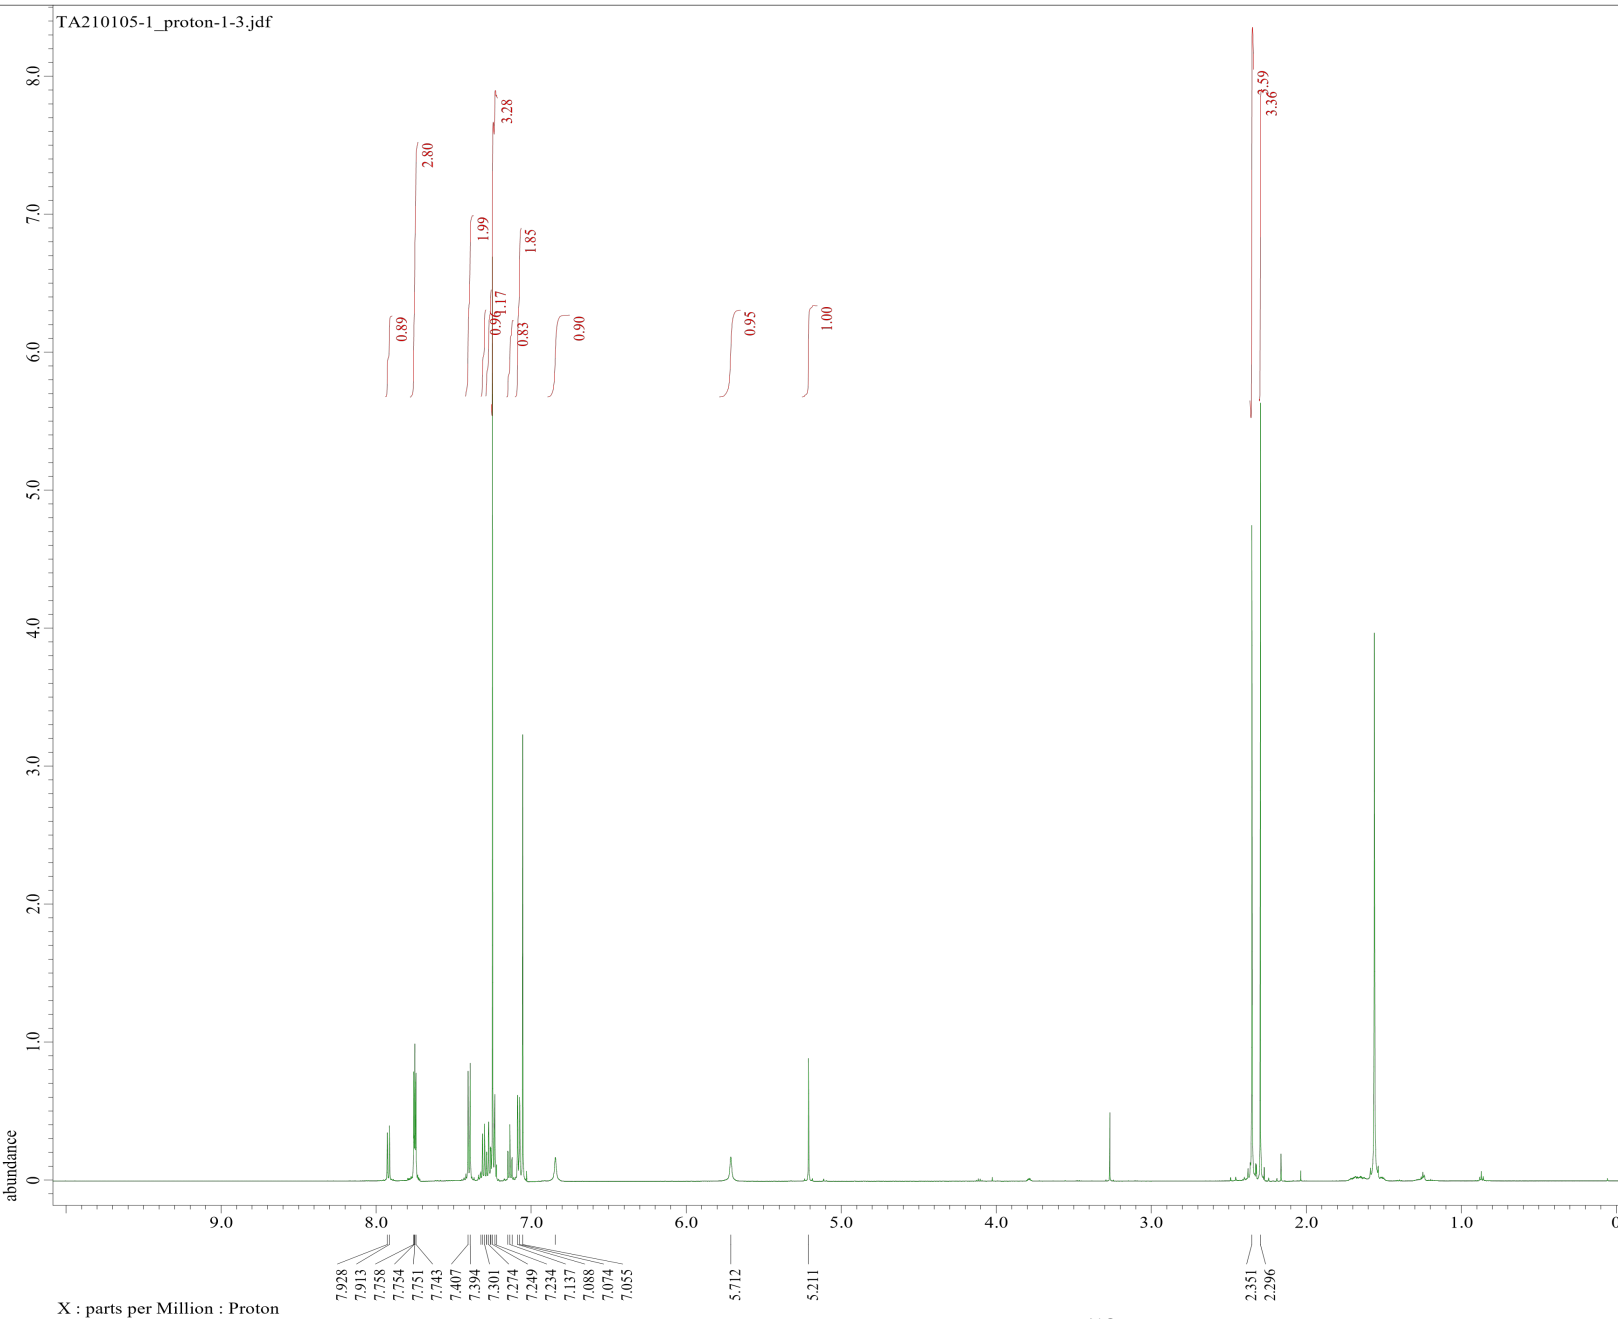

TA210105-1\_carbon-1-2.jdf

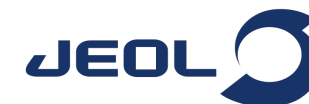

```

Filename           = TA210105-1_carbon-
Author            = delta
Experiment        = carbon.jxp
Sample_Id        = TA210105-1
Solvent          = CHLOROFORM-D
Actual_Start_Time = 6-JAN-2021 01:32:
Revision_Time    = 6-JAN-2021 08:11:

Comment          = single pulse decou
Data_Format      = 1D_COMPLEX
Dim Size        = 26214
X_Domain        = Carbon13
Dim Title       = Carbon13
Dim Units       = [ppm]
Dimensions      = X
Spectrometer     = JNM-ECZ600R/S3

Field_Strength   = 14.09636928[T] (60
X_Acq_Duration  = 0.69206016[s]
X_Domain        = Carbon13
X_Freq          = 150.91343039[MHz]
X_Offset        = 100[ppm]
X_Points        = 32768
X_Prescans      = 4
X_Resolution    = 1.44496109[Hz]
X_Sweep         = 47.34848485[kHz]
X_Sweep_Clipped = 37.87878788[kHz]
Irr_Domain      = Proton
Irr_Freq        = 600.1723046[MHz]
Irr_Offset      = 5[ppm]
Blanking        = 15[us]
Clipping        = TRUE
Scans           = 7000
Total_Scans     = 7000

Relaxation_Delay = 1[s]
Recvr_Gain       = 56
Temp_Get        = 19.9[dc]
X_90_Width      = 8.8[us]
X_Acq_Time      = 0.69206016[s]
X_Angle         = 30[deg]
X_Atn           = 11[db]
X_Pulse         = 2.93333333[us]
Irr_Atn_Dec     = 26.162[db]
Irr_Atn_Dec_Calc = 26.162[db]
Irr_Atn_Dec_Default_Calc = 26.162[db]
Irr_Atn_Noise  = 26.162[db]
Irr_Dec_Bandwidth_Hz = 7.23684211[kHz]
Irr_Dec_Bandwidth_Fpm = 12.05794078[ppm]
Irr_Dec_Freq    = 600.1723046[MHz]
Irr_Dec_Merit_Factor = 2.2
Irr_Decoupling = TRUE
Irr_Noise       = TRUE
Irr_Noise       = WALZE
Irr_Offset_Default = 5[ppm]
Irr_Pwidth      = 76[us]
Irr_Pwidth_Default = 76[us]
Irr_Pwidth_Default_Calc = 76[us]
Irr_Pwidth_Templ = 76[us]
Irr_Rurst       = FALSE
Decimation_Rate = 0
Experiment_Path = c:\Program Files\J
Initial_Wait    = 1[s]
Noe_Time        = 1[s]
Noe_Time_Flag   = FALSE
Relaxation_Delay_Calc = 0[s]
Relaxation_Delay_Temp = 1[s]
Repetition_Time = 1.69206016[s]
    
```

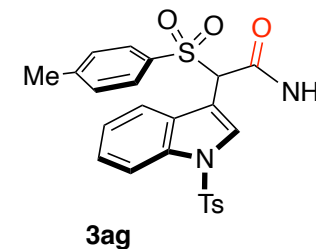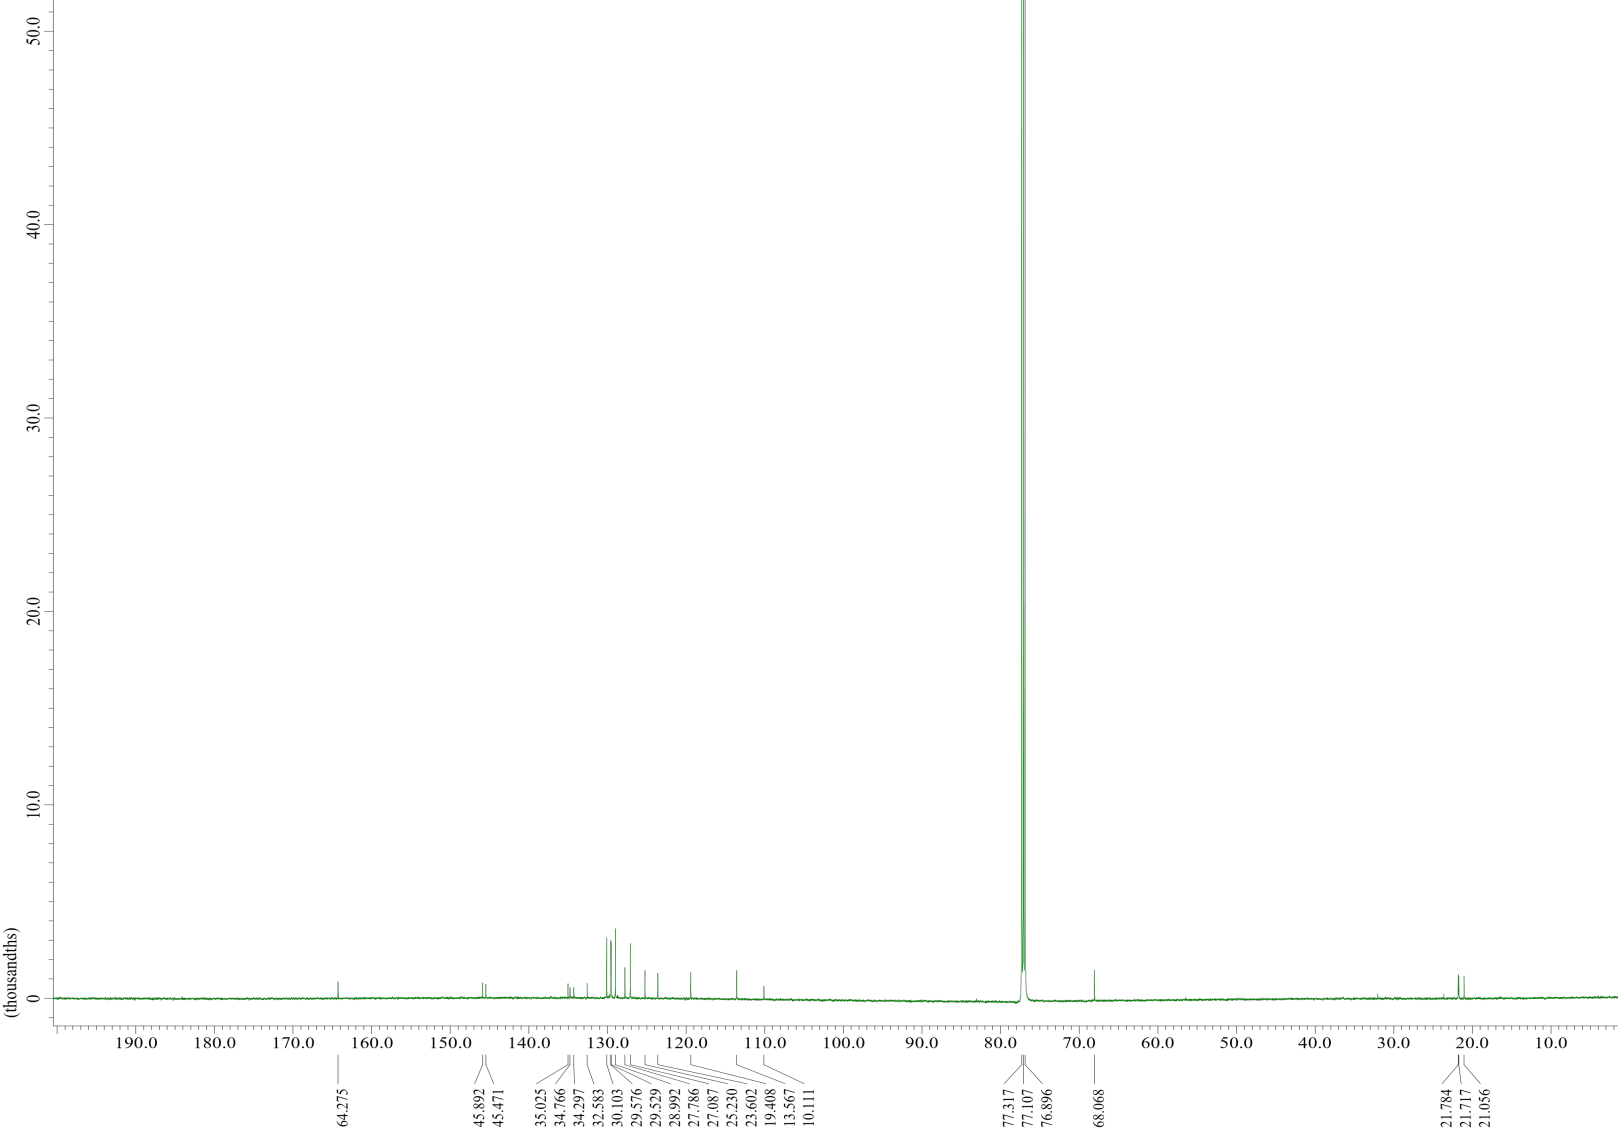

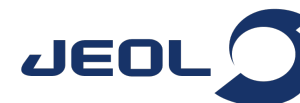

Filename = TA210107-Ms-6\_proton-  
Author = delta  
Experiment = proton.jxp  
Sample Id = TA210107-Ms-6  
Solvent = CHLOROFORM-D  
Actual Start Time = 7-JAN-2021 21:21:42  
Revision Time = 7-JAN-2021 21:28:44

Comment = single\_pulse-MsCH2CN-  
Data Format = 1D COMPLEX  
Dim Size = 13107  
X\_Domain = Proton  
Dim Title = Proton  
Dim Units = [ppm]  
Dimensions = X  
Spectrometer = JNM-ECZ600R/S3

Field Strength = 14.09636928[T] (600[M  
X\_Acq\_Duration = 1.4548992[s]  
X\_Domain = Proton  
X\_Freq = 600.1723046[MHz]  
X\_Offset = 5[ppm]  
X\_Points = 16384  
X\_Prescans = 1  
X\_Resolution = 0.68733284[Hz]  
X\_Sweep = 11.26126126[kHz]  
X\_Sweep\_Clipped = 9.00900901[kHz]  
Irr\_Domain = Proton  
Irr\_Freq = 600.1723046[MHz]  
Irr\_Offset = 5[ppm]  
Tri\_Domain = Proton  
Tri\_Freq = 600.1723046[MHz]  
Tri\_Offset = 5[ppm]  
Blanking = 5[us]  
Clipped = FALSE  
Scans = 8  
Total\_Scans = 8

Relaxation\_Delay = 5[s]  
Recvr\_Gain = 36  
Temp\_Get = 20.2[dC]  
X\_90\_Width = 9.5[us]  
X\_Acq\_Time = 1.4548992[s]  
X\_Angle = 45[deg]  
X\_Atn = 8.1[dB]  
X\_Pulse = 4.75[us]  
Irr\_Mode = Off  
Tri\_Mode = Off  
Dante\_Loop = 500  
Dante\_Presat = FALSE  
Decimation\_Rate = 0  
Experiment\_Path = c:\Program Files\JEOL  
Initial\_Wait = 1[s]  
Phase = {0, 90, 270, 180, 180  
Presat\_Time = 5[s]  
Presat\_Time\_Flag = FALSE  
Relaxation\_Delay\_Calc = 0[s]  
Relaxation\_Delay\_Temp = 5[s]  
Repetition\_Time = 6.4548992[s]

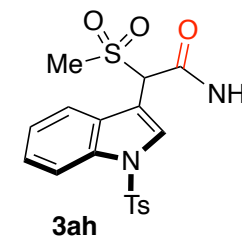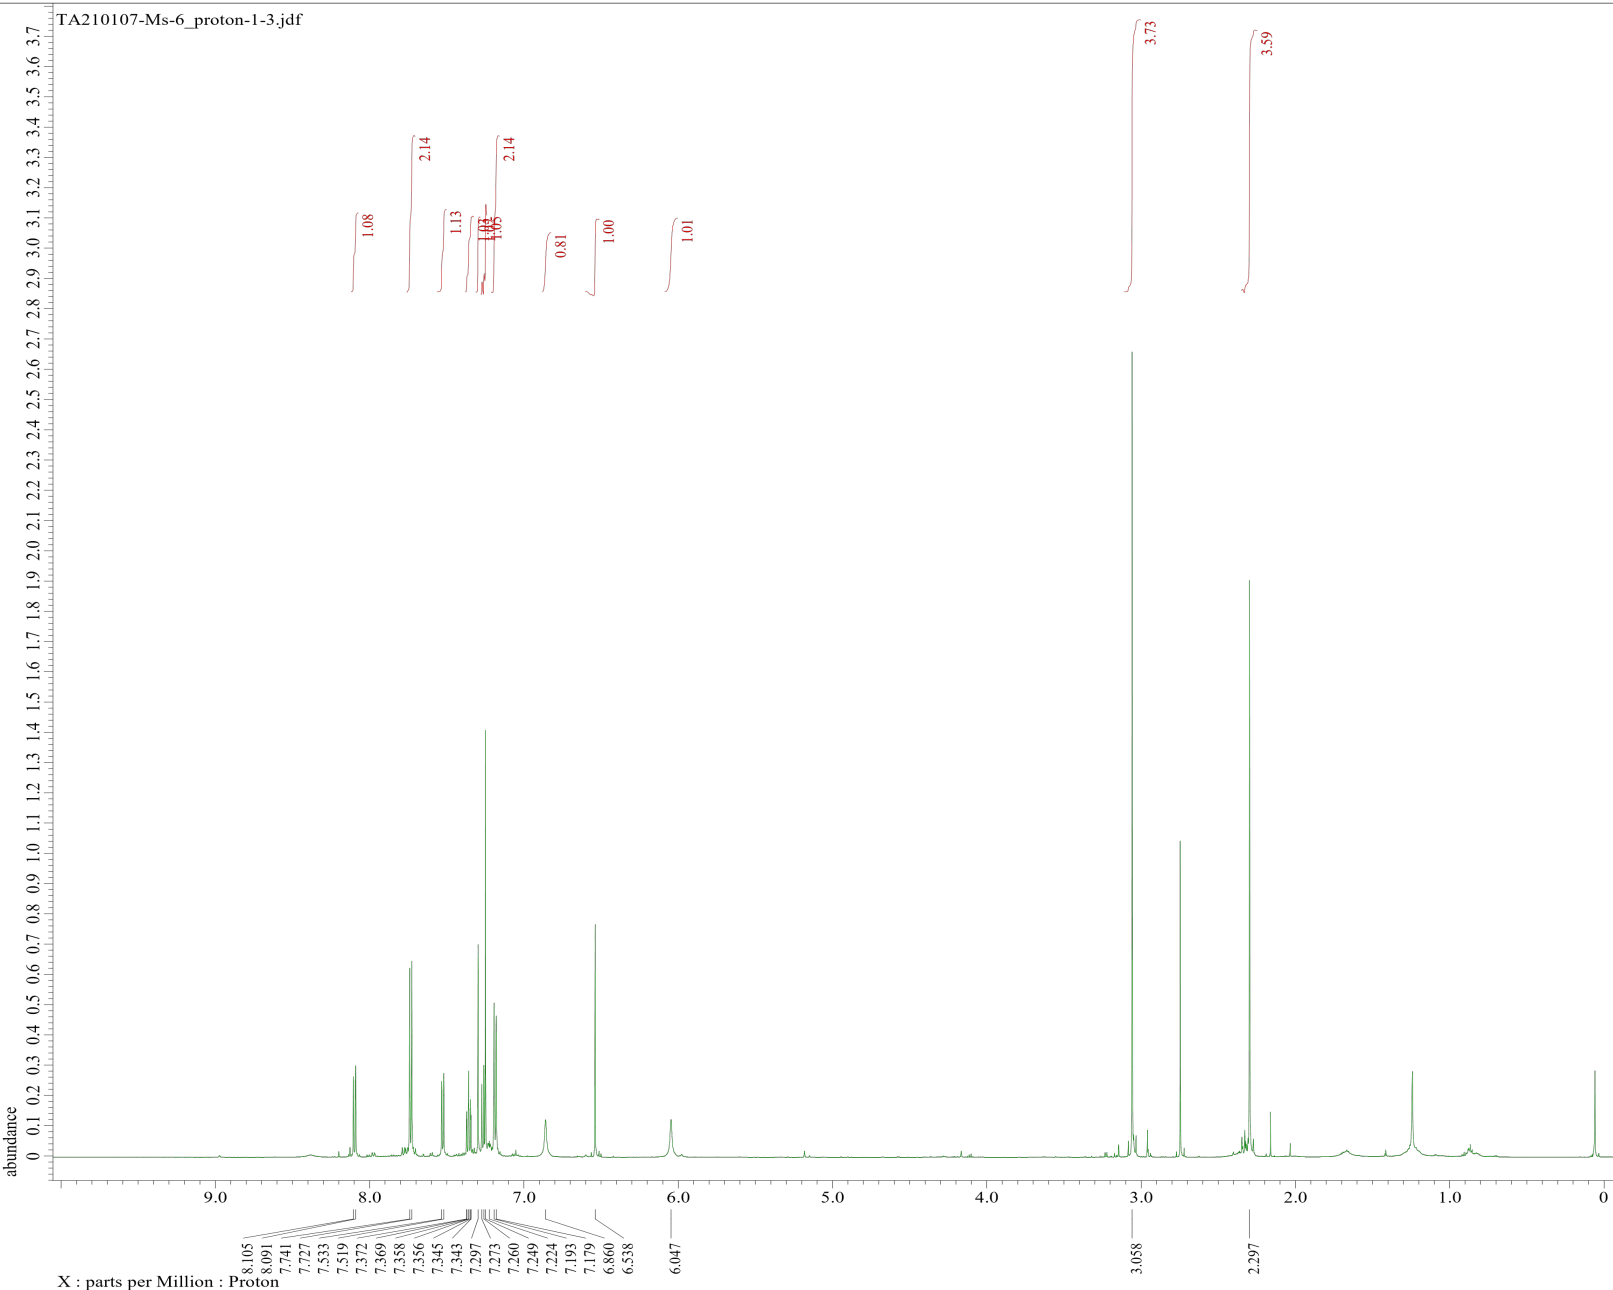



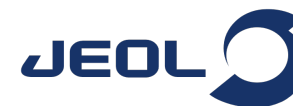

Filename = TA210107-Ms-6\_carb  
Author = delta  
Experiment = carbon.jxp  
Sample\_Id = TA210107-Ms-6  
Solvent = CHLOROFORM-D  
Actual\_Start\_Time = 7-JAN-2021 21:26:  
Revision\_Time = 8-JAN-2021 08:24:

Comment = single pulse decou  
Data\_Format = 1D COMPLEX  
Dim\_Size = 26214  
X\_Domain = Carbon13  
Dim\_Title = Carbon13  
Dim\_Units = [ppm]  
Dimensions = X  
Spectrometer = JNM-ECZ600R/S3

Field\_Strength = 14.09636928 [T] (60  
X\_Acq\_Duration = 0.69206016 [s]  
X\_Domain = Carbon13  
X\_Freq = 150.91343039 [MHz]  
X\_Offset = 100 [ppm]  
X\_Points = 32768  
X\_Prescans = 4  
X\_Resolution = 1.44496109 [Hz]  
X\_Sweep = 47.34848485 [kHz]  
X\_Sweep\_Clipped = 37.87878788 [kHz]  
Irr\_Domain = Proton  
Irr\_Freq = 600.1723046 [MHz]  
Irr\_Offset = 5 [ppm]  
Blanking = 15 [us]  
Clipped = TRUE  
Scans = 8000  
Total\_Scans = 8000

Relaxation\_Delay = 1 [s]  
Recvr\_Gain = 46  
Temp\_Get = 20.2 [dC]  
X\_90\_Width = 8.8 [us]  
X\_Acq\_Time = 0.69206016 [s]  
X\_Angle = 30 [deg]  
X\_Atn = 11 [dB]  
X\_Pulse = 2.93333333 [us]  
Irr\_Atn\_Dec = 26.162 [dB]  
Irr\_Atn\_Dec\_Calc = 26.162 [dB]  
Irr\_Atn\_Dec\_Default\_Calc = 26.162 [dB]  
Irr\_Atn\_No = 26.162 [dB]  
Irr\_Dec\_Bandwidth\_Hz = 7.23684211 [kHz]  
Irr\_Dec\_Bandwidth\_Fpm = 12.05794078 [ppm]  
Irr\_Dec\_Freq = 600.1723046 [MHz]  
Irr\_Dec\_Merit\_Factor = 2.2  
Irr\_Decoupling = TRUE  
Irr\_No = TRUE  
Irr\_Noise = WALTZ  
Irr\_Offset\_Default = 5 [ppm]  
Irr\_Pwidth = 76 [us]  
Irr\_Pwidth\_Default = 76 [us]  
Irr\_Pwidth\_Default\_Calc = 76 [us]  
Irr\_Pwidth\_Temp1 = 76 [us]  
Irr\_Wurst = FALSE  
Decimation\_Rate = 0  
Experiment\_Path = c:\Program Files\J  
Initial\_Wait = 1 [s]  
Noe\_Time = 1 [s]  
Noe\_Time\_Flag = FALSE  
Relaxation\_Delay\_Calc = 0 [s]  
Relaxation\_Delay\_Temp = 1 [s]  
Repetition\_Time = 1.69206016 [s]

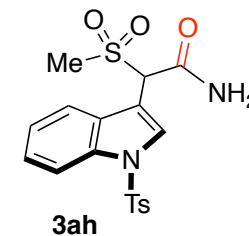

TA210107-Ms-6\_carbon-1-2.jdf

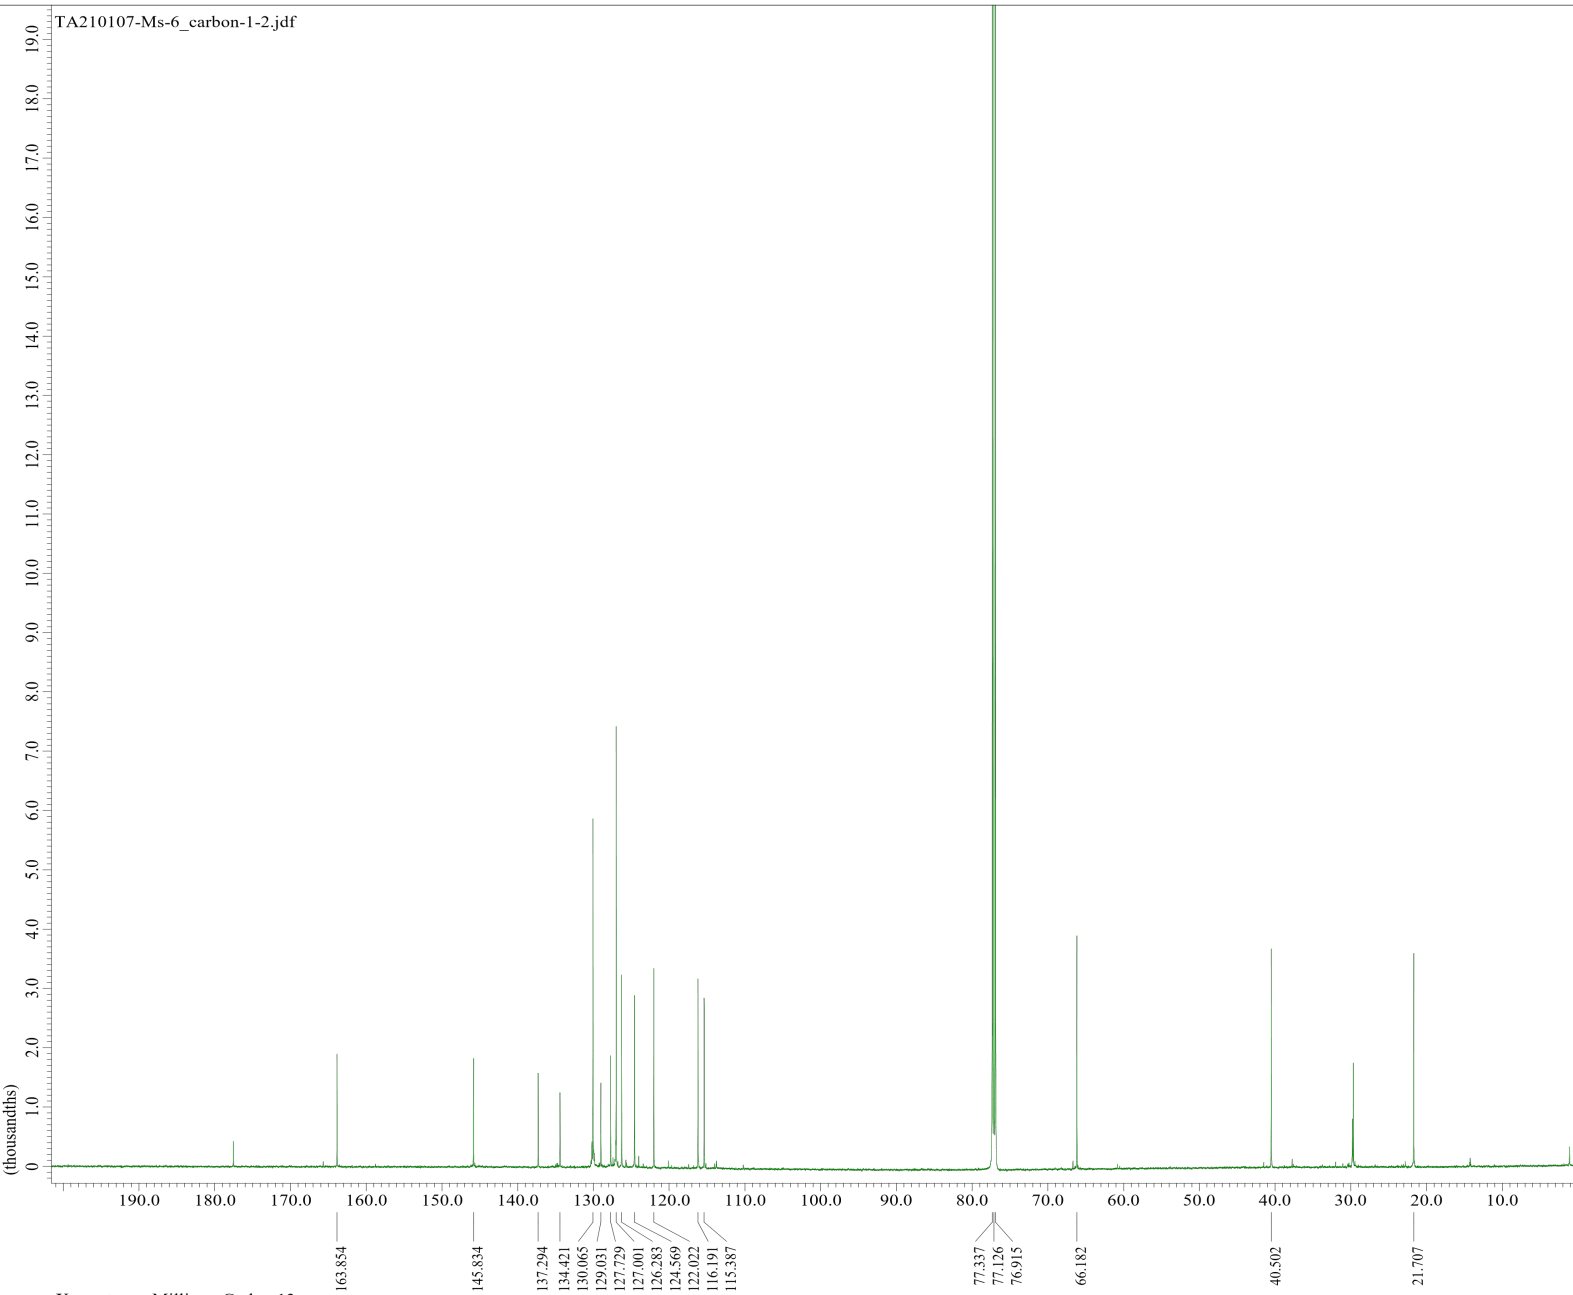

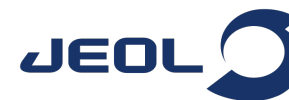

TA201223-3\_proton-1-2.jdf

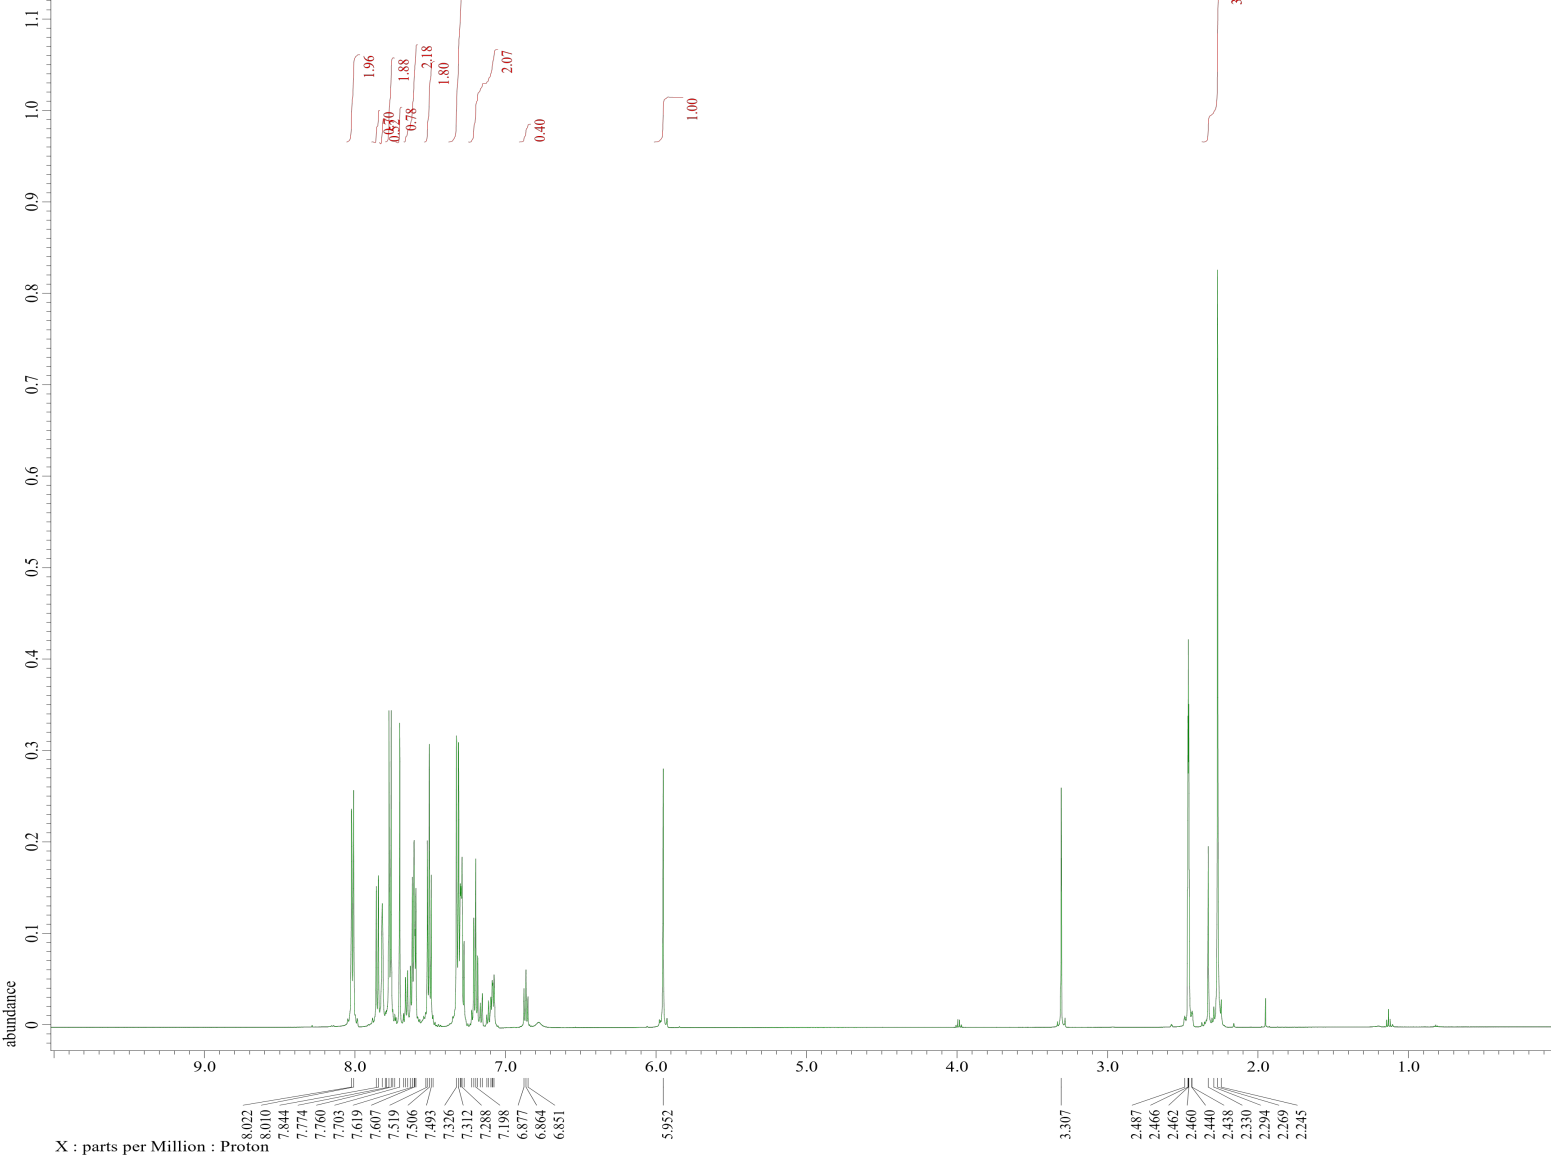

```
Filename      = TA201223-3_proton-1-2
Author       = delta
Experiment   = proton.jxp
Sample_Id    = TA201223-3
Solvent      = DMSO-D6
Actual_Start_Time = 23-DEC-2020 22:14:21
Revision_Time   = 23-DEC-2020 22:18:59

Comment      = single_pulse-Bz-indol
Data_Format  = 1D COMPLEX
Dim_Size     = 13107
X_Domain     = Proton
Dim_Title    = Proton
Dim_Units    = [ppm]
Dimensions   = X
Spectrometer = JNM-ECZ600R/S3

Field_Strength = 14.09636928 [T] (600 [M]
X_Acq_Duration = 1.4548992 [s]
X_Domain       = Proton
X_Freq         = 600.1723046 [MHz]
X_Offset       = 5 [ppm]
X_Points       = 16384
X_Prescans     = 1
X_Resolution   = 0.68733284 [Hz]
X_Sweep        = 11.26126126 [kHz]
X_Sweep_Clipped = 9.00900901 [kHz]
Irr_Domain     = Proton
Irr_Freq       = 600.1723046 [MHz]
Irr_Offset     = 5 [ppm]
Tri_Domain     = Proton
Tri_Freq       = 600.1723046 [MHz]
Tri_Offset     = 5 [ppm]
Blanking       = FALSE
Clipped        = FALSE
Scans          = 16
Total_scans    = 16

Relaxation_Delay = 5 [s]
Recvr_Gain       = 36
Temp_Get         = 19.6 [dC]
X_90_Width      = 9.5 [us]
X_Acq_Time      = 1.4548992 [s]
X_Angle         = 45 [deg]
X_Atn           = 8.1 [dB]
X_Pulse         = 4.75 [us]
Irr_Mode        = Off
Tri_Mode        = Off
Dante_Loop      = 500
Dante_Presat    = FALSE
Decimation_Rate = 0
Experiment_Path = c:\Program Files\JEOL
Initial_Wait    = 1 [s]
Phase           = (0, 90, 270, 180, 180
Presat_Time     = 5 [s]
Presat_Time_Flag = FALSE
Relaxation_Delay_Calc = 0 [s]
Relaxation_Delay_Temp = 5 [s]
Repetition_Time = 6.4548992 [s]
```

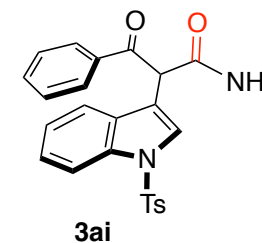

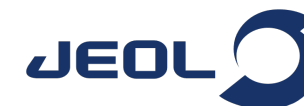

```

Filename      = TA201223-3_carbon-
Author       = delta
Experiment    = carbon.jxp
Sample_Id    = TA201223-3
Solvent      = DMSO-D6
Actual_Start_Time = 23-DEC-2020 22:19:
Revision_Time = 24-DEC-2020 08:10:

Comment      = single pulse decou
Data_Format  = 1D COMPLEX
Dim_Size     = 26214
X_Domain     = Carbon13
Dim_Title    = Carbon13
Dim_Units    = [ppm]
Dimensions   = X
Spectrometer = JNM-ECZ600R/S3

Field_Strength = 14.09636928[T] (60
X_Acq_Duration = 0.69206016[s]
X_Domain       = Carbon13
X_Freq         = 150.91343039[MHz]
X_Offset       = 100[ppm]
X_Points       = 32768
X_Prescans     = 4
X_Resolution   = 1.44496109[Hz]
X_Sweep        = 47.34848485[kHz]
X_Sweep_Clipped = 37.87878788[kHz]
IR_Domain      = Proton
IR_Freq        = 600.1723046[MHz]
IR_Offset      = 5[ppm]
Blanking       = 15[us]
Clipped        = FALSE
Scans          = 1300
Total_Scans    = 1300

Relaxation_Delay = 1[s]
Recvr_Gain       = 56
Temp_Get         = 19.8[dc]
X_90_Width      = 8.8[us]
X_Acq_Time      = 0.69206016[s]
X_Angle         = 30[deg]
X_Atn           = 11[db]
X_Pulse         = 2.93333333[us]
IR_Atn_Dec      = 26.162[db]
IR_Atn_Dec_Calc = 26.162[db]
IR_Atn_Dec_Default_Calc = 26.162[db]
IR_Atn_Noise   = 26.162[db]
IR_Dec_Bandwidth_Hz = 7.23684211[kHz]
IR_Dec_Bandwidth_Fpm = 12.05794078[ppm]
IR_Dec_Freq     = 600.1723046[MHz]
IR_Dec_Merit_Factor = 2.2
IR_Decoupling   = TRUE
IR_Noise        = TRUE
IR_Noise        = WALTZ
IR_Offset_Default = 5[ppm]
IR_Fwidth       = 76[us]
IR_Fwidth_Default = 76[us]
IR_Fwidth_Default_Calc = 76[us]
IR_Fwidth_Templ = 76[us]
IR_Wurst        = FALSE
Decimation_Rate = 0
Experiment_Path = c:\Program Files\J
Initial_Wait    = 1[s]
Noe_Time        = 1[s]
Noe_Time_Flag   = FALSE
Relaxation_Delay_Calc = 0[s]
Relaxation_Delay_Temp = 1[s]
Repetition_Time = 1.69206016[s]

```

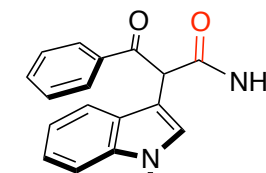

3ai

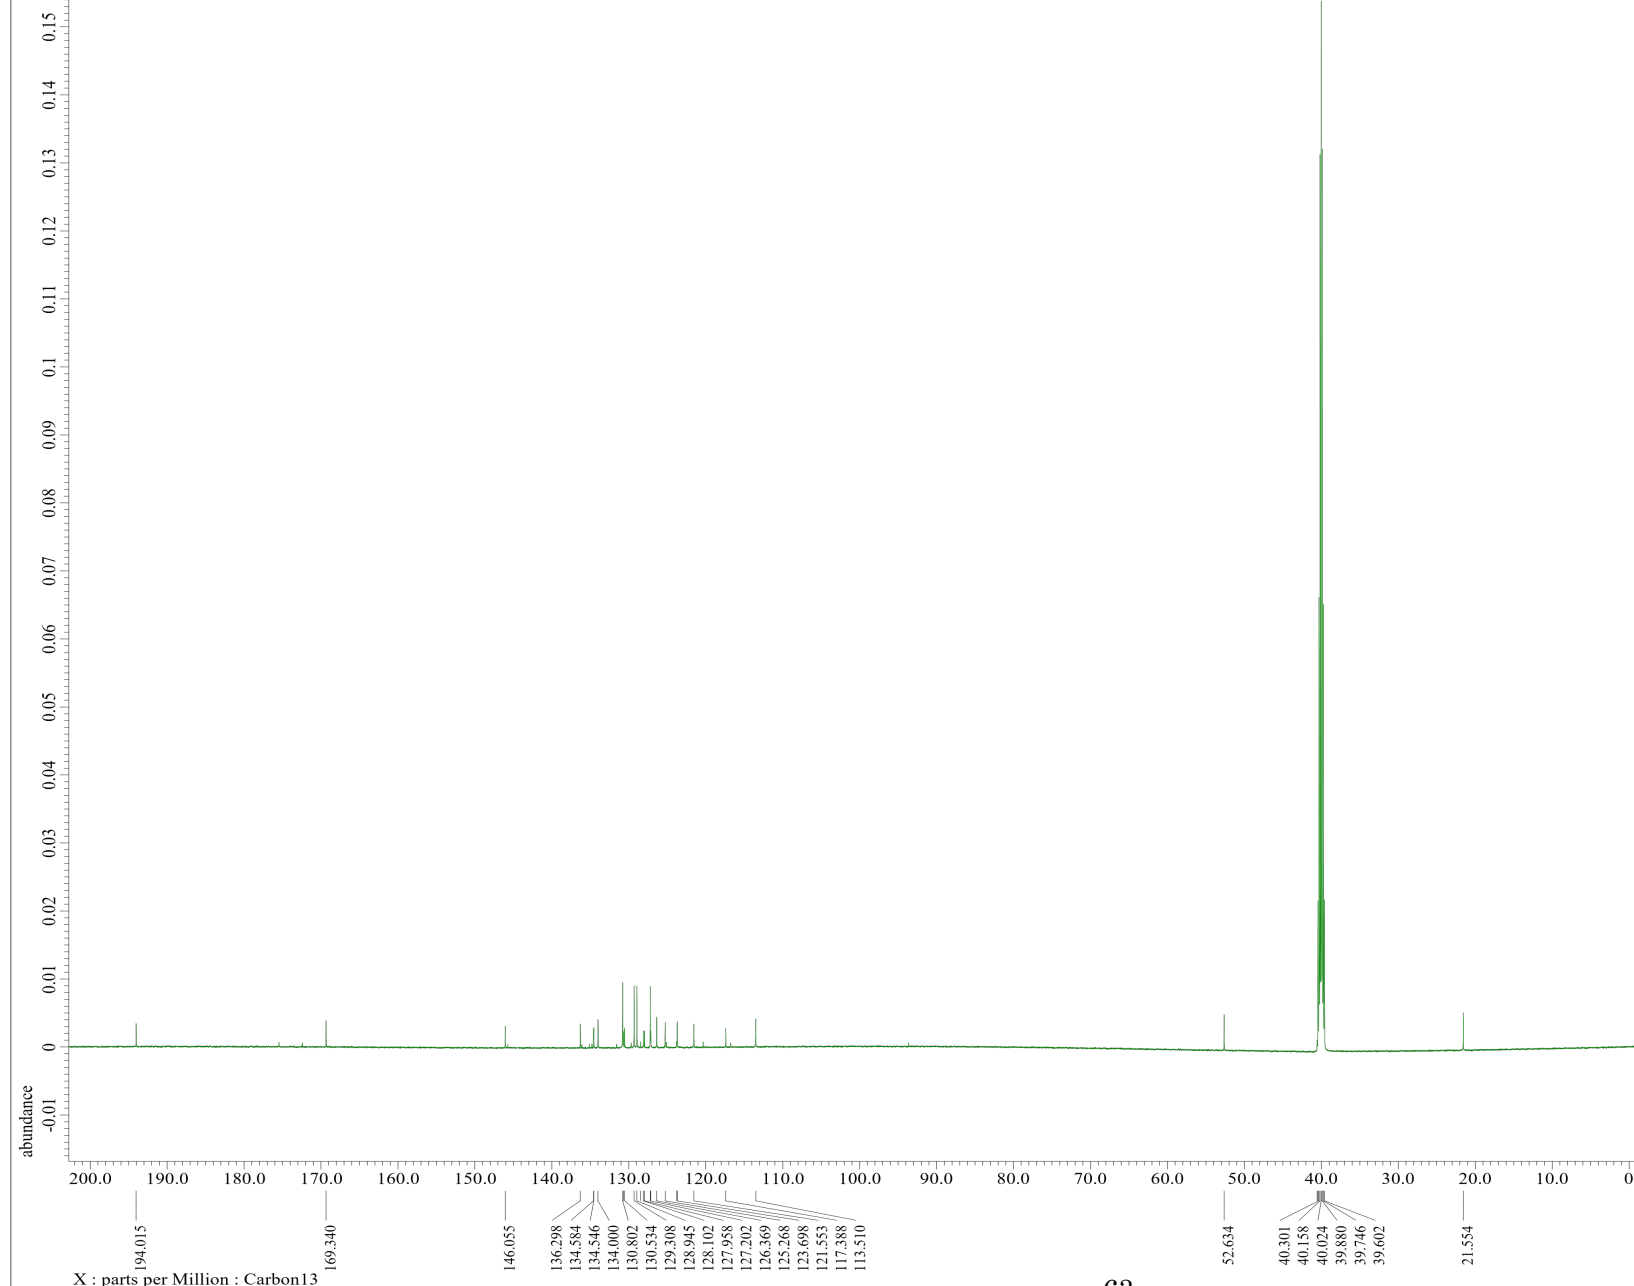

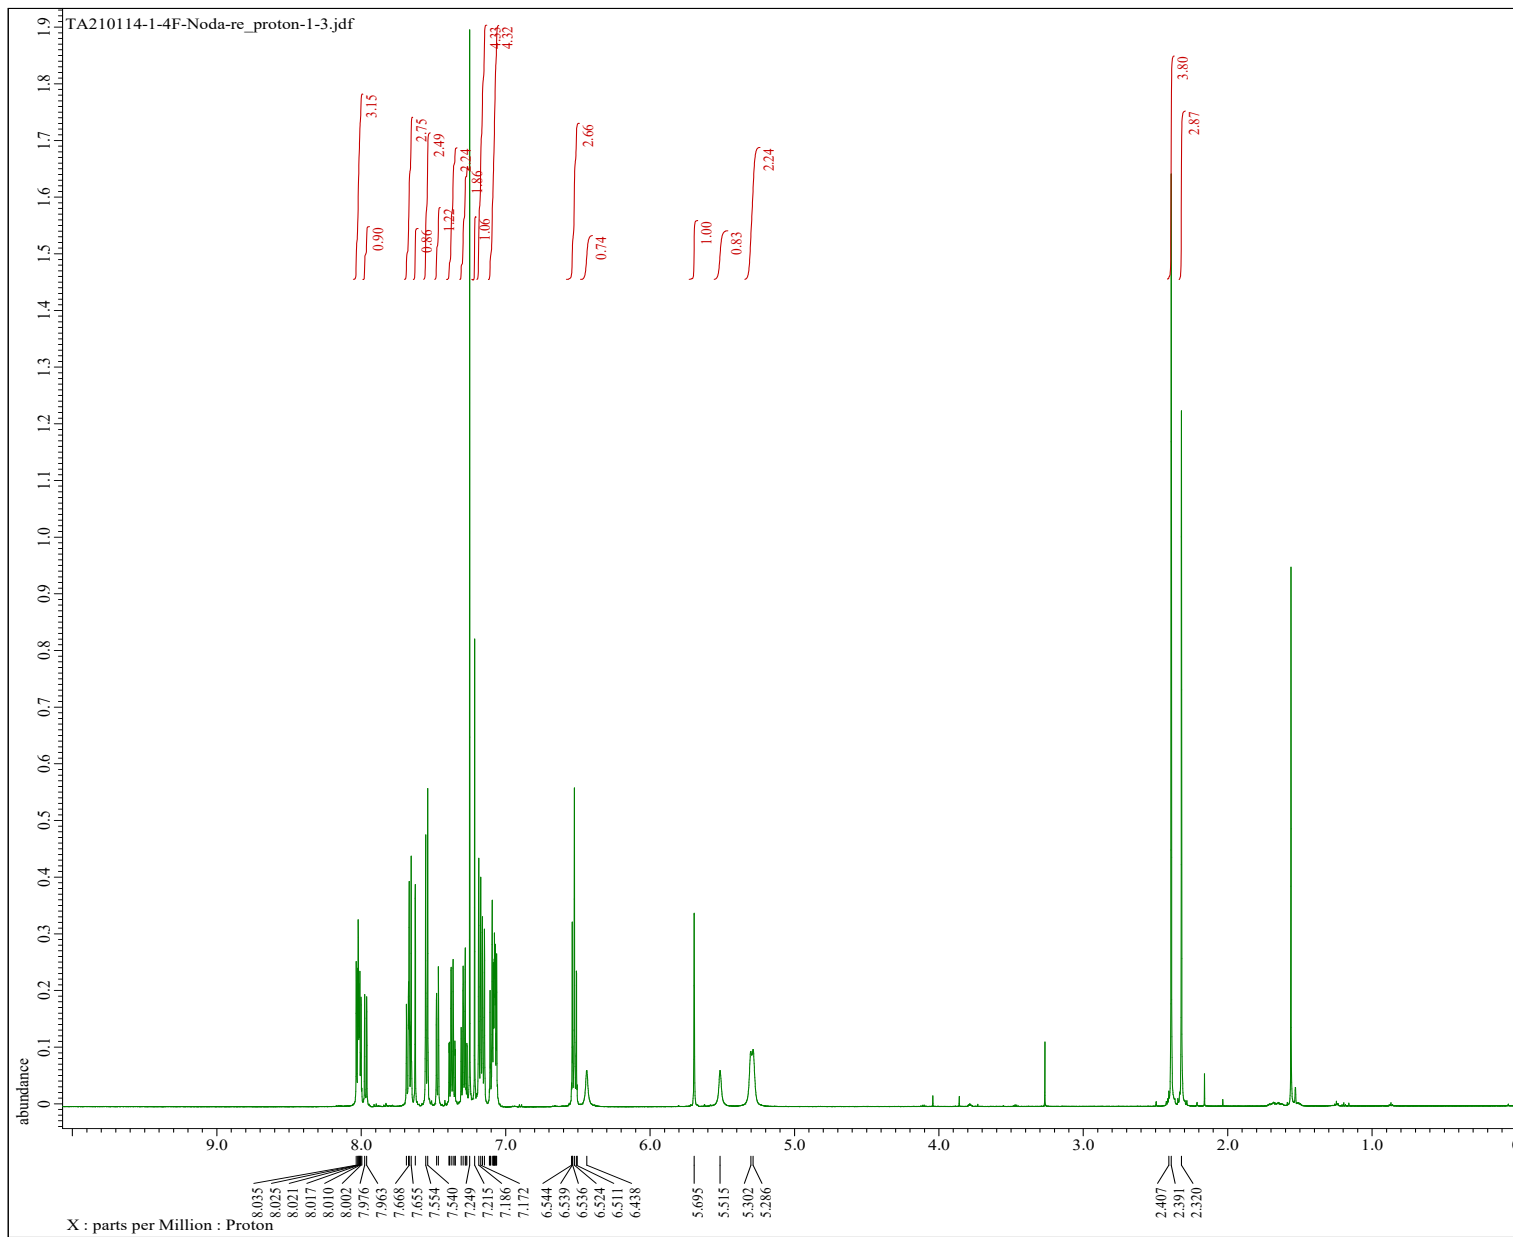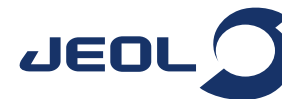

```

Filename      = TA210114-1-4F-Noda-re
Author       = delta
Experiment   = proton.jmp
Sample_Id    = TA210114-1-4F-Noda-re
Solvent      = CHLOROFORM-D
Actual_Start_Time = 14-JAN-2021 20:46:26
Revision_Time  = 17-JAN-2021 18:36:12

Comment      = 4F-indolyacetamide
Data_Format  = 1D COMPLEX
Dim_Size     = 13107
X_Domain     = Proton
Dim_Title    = Proton
Dim_Units    = [ppm]
Dimensions   = X
Spectrometer = JNM-ECZ600R/S3

Field_Strength = 14.09636928[T] (600[M
X_Acq_Duration = 1.4548992[s]
X_Domain       = Proton
X_Freq         = 600.1723046[MHz]
X_Offset       = 5[ppm]
X_Points       = 16384
X_Prescans     = 1
X_Resolution   = 0.68733284[Hz]
X_Sweep        = 11.26126126[kHz]
X_Sweep_Clipped = 9.00900901[kHz]
Irr_Domain     = Proton
Irr_Freq       = 600.1723046[MHz]
Irr_Offset     = 5[ppm]
Tri_Domain     = Proton
Tri_Freq       = 600.1723046[MHz]
Tri_Offset     = 5[ppm]
Blanking       = 5[us]
Clipped        = FALSE
Scans          = 8
Total_Scans    = 8

Relaxation_Delay = 5[s]
Recvr_Gain       = 46
Temp_Set         = 20.4[degC]
X_90_Width      = 9.5[us]
X_Acq_Time      = 1.4548992[s]
X_Angle         = 45[deg]
X_P1n           = 8.1[db]
X_Pulse         = 4.75[us]
Irr_Mode        = Off
Tri_Mode        = Off
Dante_Loop      = 500
Dante_Presat    = FALSE
Decimation_Rate = 0
Experiment_Path = c:\Program Files\JEOL
Initial_Wait    = 1[s]
Phase           = {0, 90, 270, 180, 180
Presat_Time     = 5[s]
Presat_Time_Flag = FALSE
Relaxation_Delay_Calc = 0[s]
Relaxation_Delay_Temp = 5[s]
Repetition_Time = 6.4548992[s]
  
```

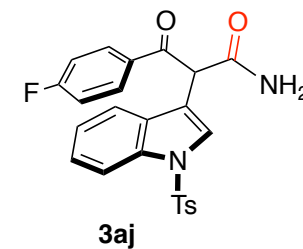

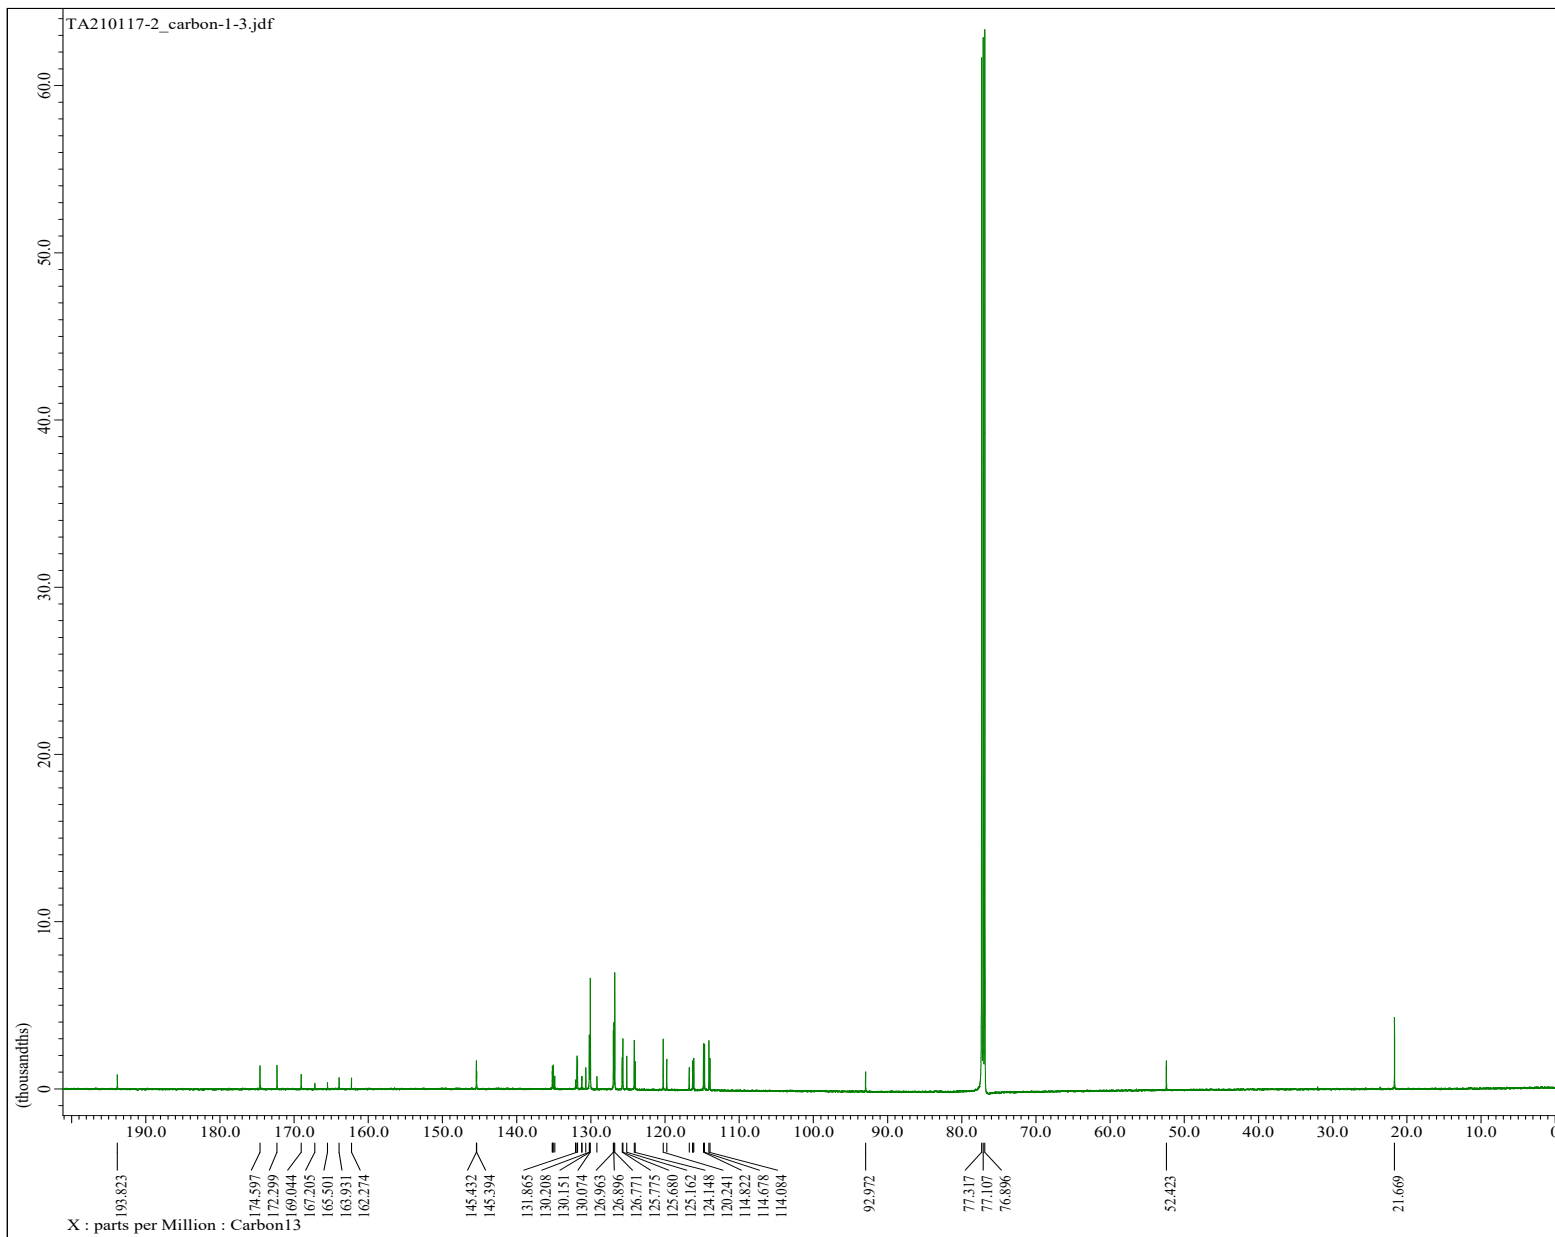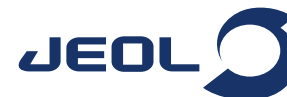

```

Filename      = TA210117-2_carbon-
Author       = delta
Experiment   = carbon.jxp
Sample Id    = TA210117-2
Solvent      = CHLOROFORM-D
Actual_Start_Time = 17-JAN-2021 22:03:
Revision_Time = 18-JAN-2021 08:01:

Comment      = 4F-enol
Data_Format  = 1D COMPLEX
Dim_Size     = 26214
X_Domain     = Carbon13
Dim_Title    = Carbon13
Dim_Units    = [ppm]
Dimensions   = X
Spectrometer = JNM-ECP600R/S3

Field_Strength = 14.09636928[T] (60
X_Acq_Duration = 0.69206016[s]
X_Domain       = Carbon13
X_Freq         = 150.91343039[MHz]
X_Offset       = 100[ppm]
X_Points       = 32768
X_Prescans     = 4
X_Resolution   = 1.44496109[Hz]
X_Sweep        = 47.34848485[kHz]
X_Sweep_Clipped = 37.87878788[kHz]
Irr_Domain     = Proton
Irr_Freq       = 600.1723046[MHz]
Irr_Offset     = 5[ppm]
Blanking       = 15[us]
Clipped        = TRUE
Scans          = 10000
Total_Scans    = 10000

Relaxation_Delay = 1[s]
Recvr_Gain       = 56
Temp_Get         = 20.5[dc]
X_90_Width      = 8.8[us]
X_Acq_Time       = 0.69206016[s]
X_Angle          = 30[deg]
X_Atn            = 11[db]
X_Pulse          = 2.93333333[us]
Irr_Atn_Dec      = 26.162[db]
Irr_Atn_Dec_Calc = 26.162[db]
Irr_Atn_Dec_Default_Calc = 26.162[db]
Irr_Atn_Noise    = 26.162[db]
Irr_Dec_Bandwidth_Hz = 7.23684211[kHz]
Irr_Dec_Bandwidth_Ppm = 12.05794078[ppm]
Irr_Dec_Freq     = 600.1723046[MHz]
Irr_Dec_Merit_Factor = 2.2
Irr_Decoupling  = TRUE
Irr_Noise       = WALTZ
Irr_Offset_Default = 5[ppm]
Irr_Pwidth      = 76[us]
Irr_Pwidth_Default = 76[us]
Irr_Pwidth_Default_Calc = 76[us]
Irr_Pwidth_Templ = 76[us]
Irr_Wurst       = FALSE
Decimation_Rate = 0
Experiment_Path = c:\Program Files\J
Initial_Wait     = 1[s]
Noe_Time         = 1[s]
Noe_Time_Flag   = FALSE
Relaxation_Delay_Calc = 0[s]
Relaxation_Delay_Temp = 1[s]
Repetition_Time = 1.69206016[s]

```

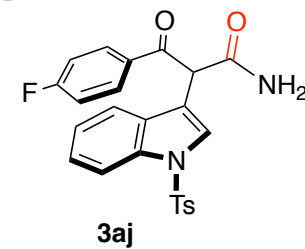

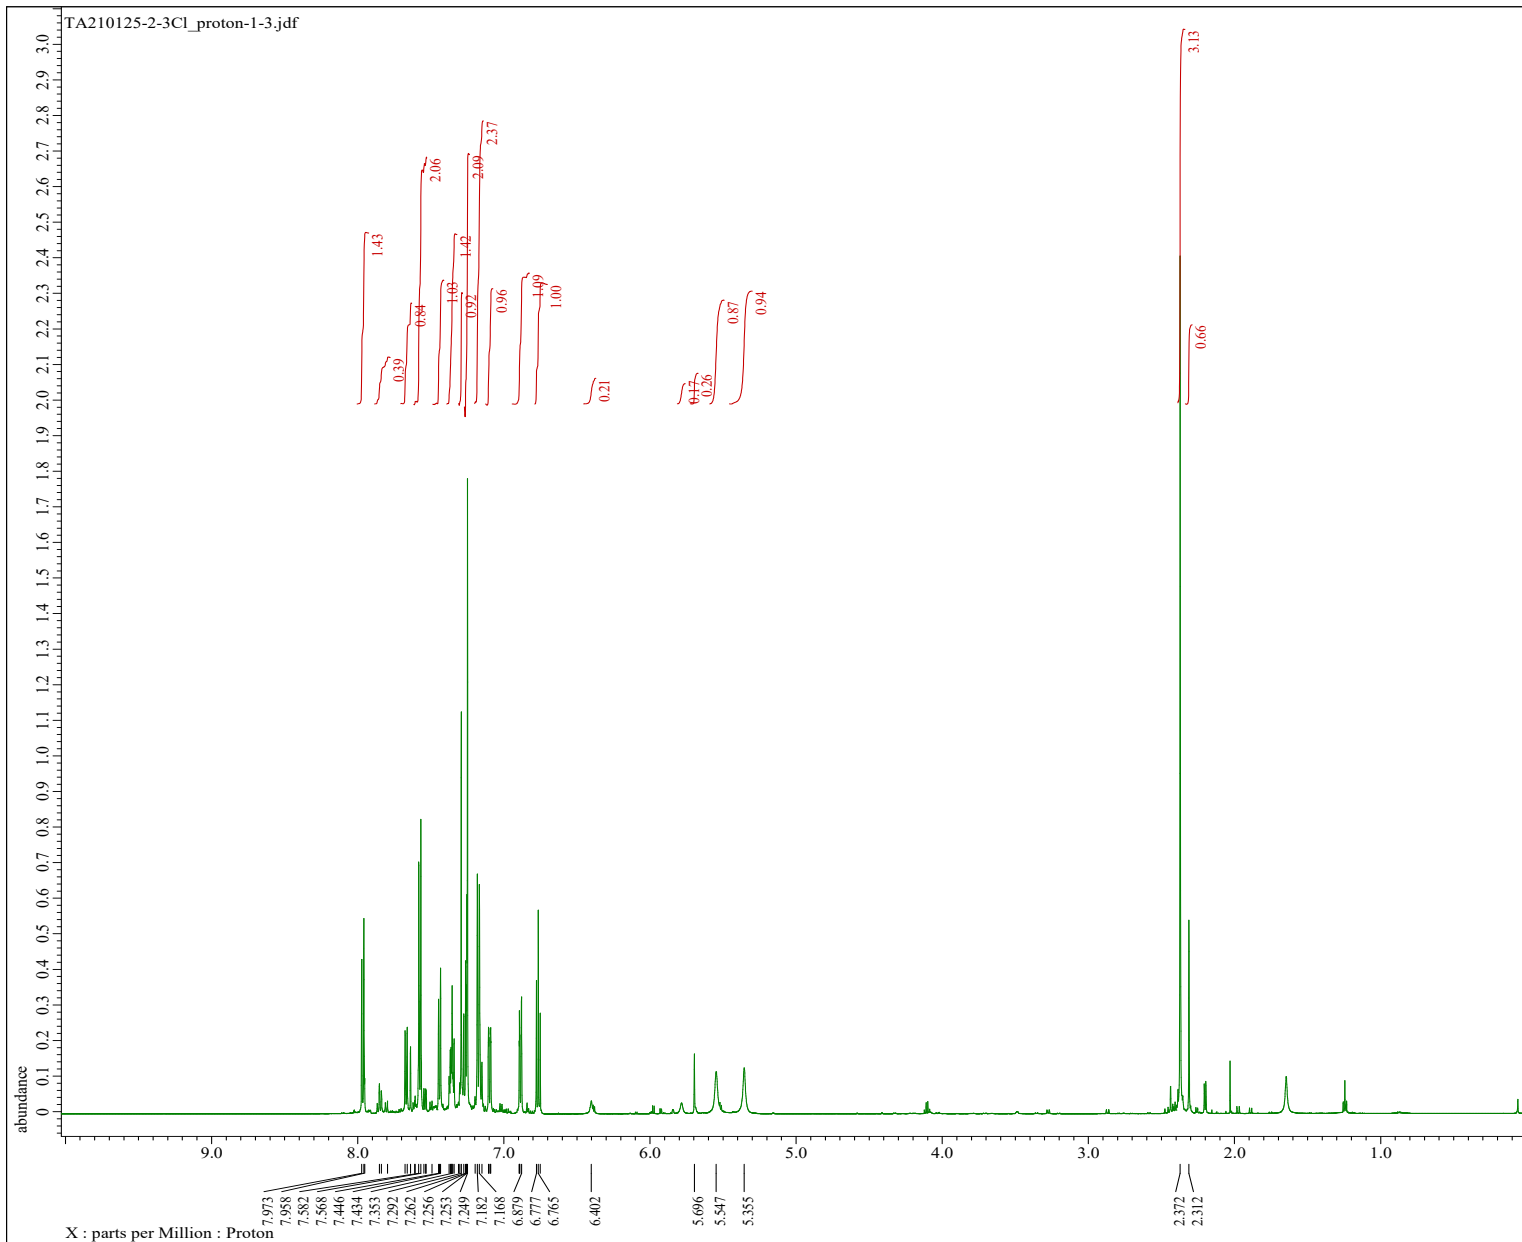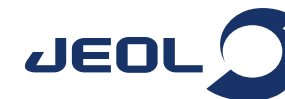

```

Filename      = TA210125-2-3Cl_proton
Author       = delta
Experiment   = proton.jxp
Sample_Id    = TA210125-2-3Cl
Solvent      = CHLOROFORM-D
Actual_Start_Time = 25-JAN-2021 20:31:11
Revision_Time   = 28-JAN-2021 13:33:30

Comment      = 3Cl-benzoylacetonitri
Data_Format  = 1D COMPLEX
Dim_Size     = 13107
X_Domain     = Proton
Dim_Title    = Proton
Dim_Units    = [ppm]
Dimensions   = X
Spectrometer = JNM-ECZ600R/S3

Field_Strength = 14.09636928[T] (600[M]
X_Acq_Duration = 1.4548992[s]
X_Domain       = Proton
X_Freq         = 600.1723046[MHz]
X_Offset       = 5[ppm]
X_Points      = 16384
X_Prescans    = 1
X_Resolution  = 0.68733284[Hz]
X_Sweep       = 11.26126126[kHz]
X_Sweep_Clip  = 9.00900901[kHz]
Irr_Domain    = Proton
Irr_Freq     = 600.1723046[MHz]
Irr_Offset    = 5[ppm]
Tri_Domain    = Proton
Tri_Freq     = 600.1723046[MHz]
Tri_Offset    = 5[ppm]
Blanking      = 5[us]
Clipped       = FALSE
Scans         = 16
Total_Scans   = 16

Relaxation_Delay = 5[s]
Recvr_Gain       = 36
Temp_Get        = 20.6[degC]
X_90_Width     = 9.5[us]
X_Acq_Time     = 1.4548992[s]
X_Angle        = 45[deg]
X_Atn          = 8.1[deg]
X_Pulse        = 4.75[us]
Irr_Mode       = Off
Tri_Mode       = Off
Dante_Loop     = 500
Dante_Preset   = FALSE
Decimation_Rate = 0
Experiment_Path = c:\Program Files\JEOL
Initial_Wait    = 1[s]
Phase          = {0, 90, 270, 180, 180}
Preset_Time    = 5[s]
Preset_Time_Flag = FALSE
Relaxation_Delay_Calc = 0[s]
Relaxation_Delay_Temp = 5[s]
Repetition_Time = 6.4548992[s]

```

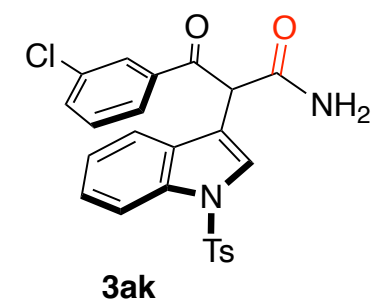

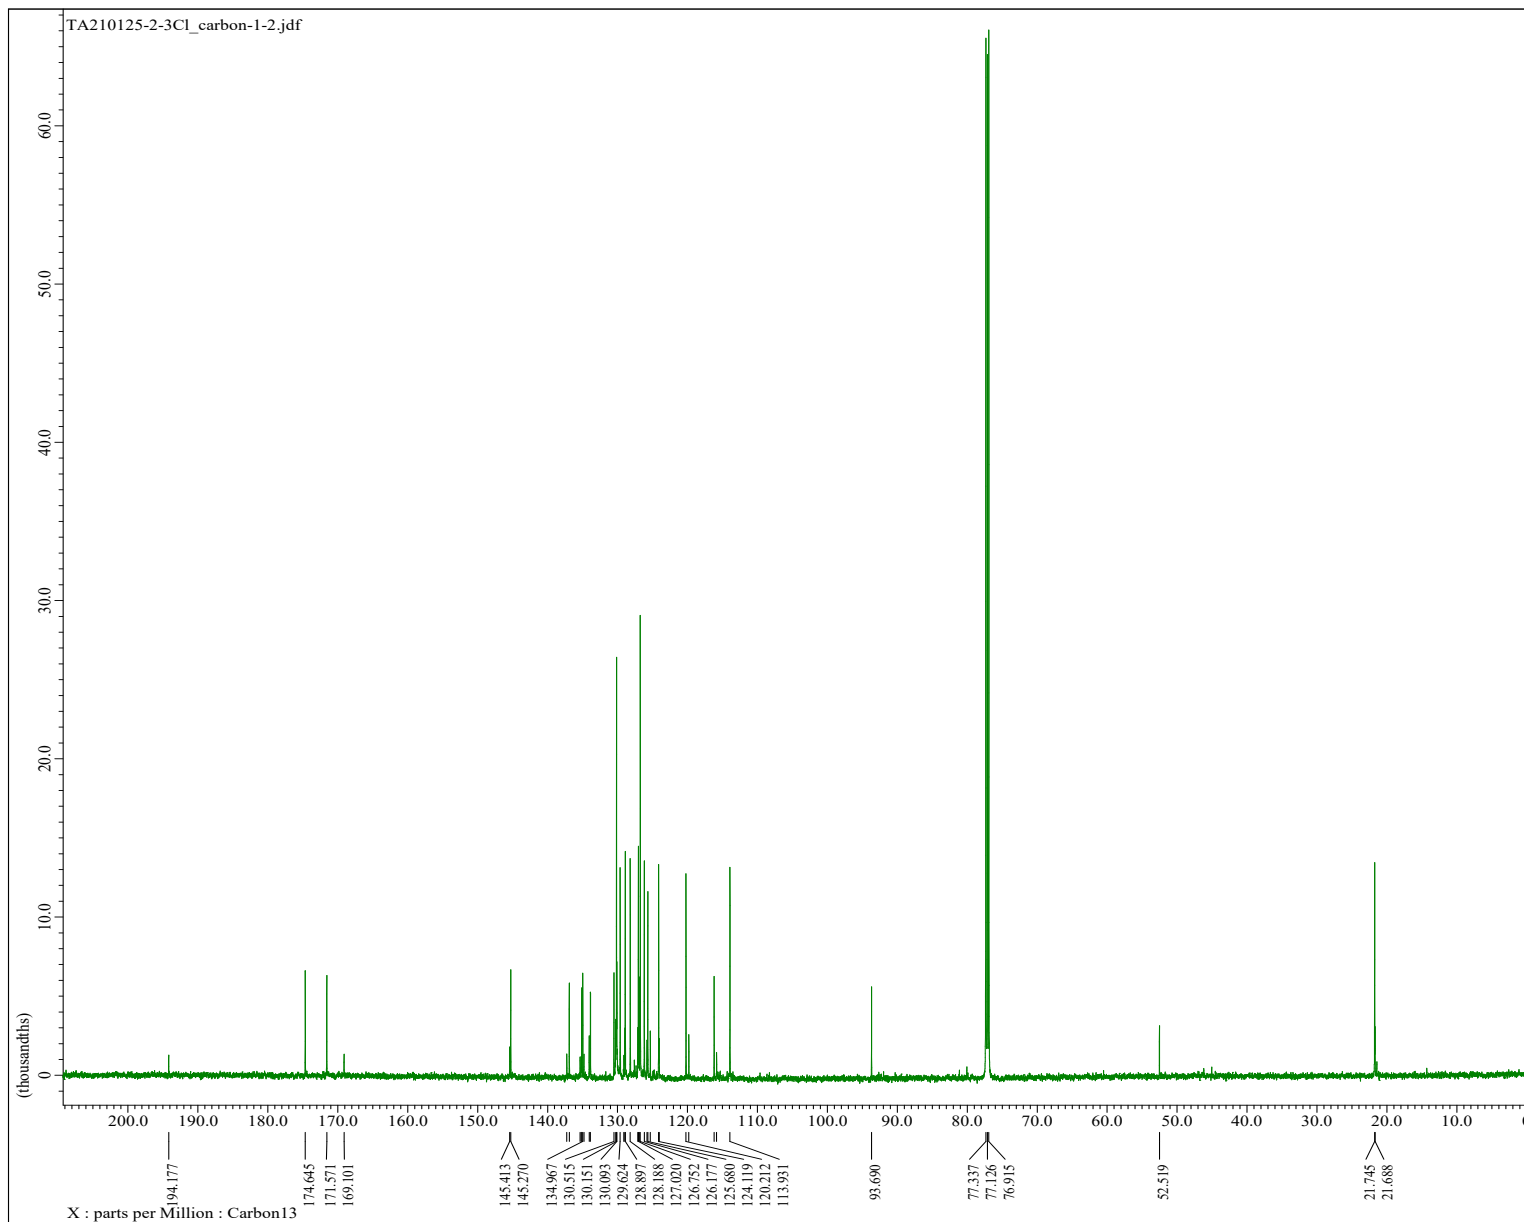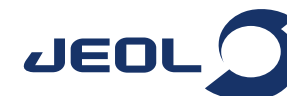

```

Filename      = TA210125-2-3Cl_car
Author       = delta
Experiment   = carbon.jmp
Sample_Id    = TA210125-2-3Cl
Solvent      = CHLOROFORM-D
Actual_Start_Time = 25-JAN-2021 20:35:
Revision_Time  = 25-JAN-2021 21:30:

Comment      = 3-Cl-benzoylacetone
Data_Format  = 1D COMPLEX
Dim_Size     = 26214
X_Domain     = Carbon13
Dim_Title    = Carbon13
Dim_Units    = [ppm]
Dimensions   = X
Spectrometer = JNM-ECZ600R/S3

Field_Strength = 14.09636928 [T] (60
X_Acq_Duration = 0.69206016 [s]
X_Domain       = Carbon13
X_Freq         = 150.91343039 [MHz]
X_Offset       = 100 [ppm]
X_Points       = 32768
X_Prescans     = 4
X_Resolution   = 1.44496109 [Hz]
X_Sweep        = 47.34848485 [kHz]
X_Sweep_Clipped = 37.87878788 [kHz]
IF1_Domain     = Proton
IF1_Freq       = 600.1723046 [MHz]
IF1_Offset     = 5 [ppm]
Blanking       = 15 [us]
Clipped        = FALSE
Scans          = 350
Total_Scans    = 350

Relaxation_Delay = 1 [s]
Recvr_Gain       = 56
Temp_Get        = 20.7 [dC]
X_90_Width      = 8.8 [us]
X_Acq_Time      = 0.69206016 [s]
X_Angle         = 30 [deg]
X_Atn           = 11 [dB]
X_Pulse         = 2.93333333 [us]
IF1_Atn_Dec     = 26.162 [dB]
IF1_Atn_Dec_Calc = 26.162 [dB]
IF1_Atn_Dec_Default_Calc = 26.162 [dB]
IF1_Atn_Noise   = 26.162 [dB]
IF1_Dec_Bandwidth_Hz = 7.23684211 [kHz]
IF1_Dec_Bandwidth_Ppm = 12.05794078 [ppm]
IF1_Dec_Freq    = 600.1723046 [MHz]
IF1_Dec_Merit_Factor = 2.2
IF1_Decoupling = TRUE
IF1_Noise       = TRUE
IF1_Noise       = WALTZ
IF1_Offset_Default = 5 [ppm]
IF1_Pwidth      = 76 [us]
IF1_Pwidth_Default = 76 [us]
IF1_Pwidth_Default_Calc = 76 [us]
IF1_Pwidth_Temp1 = 76 [us]
IF1_Wurst       = FALSE
Decimation_Rate = 0
Experiment_Path = c:\Program Files\J
Initial_Wait    = 1 [s]
Noe_Time        = 1 [s]
Noe_Time_Flag   = FALSE
Relaxation_Delay_Calc = 0 [s]
Relaxation_Delay_Temp = 1 [s]
Repetition_Time = 1.69206016 [s]

```

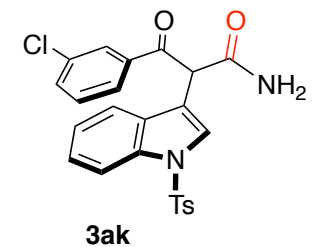

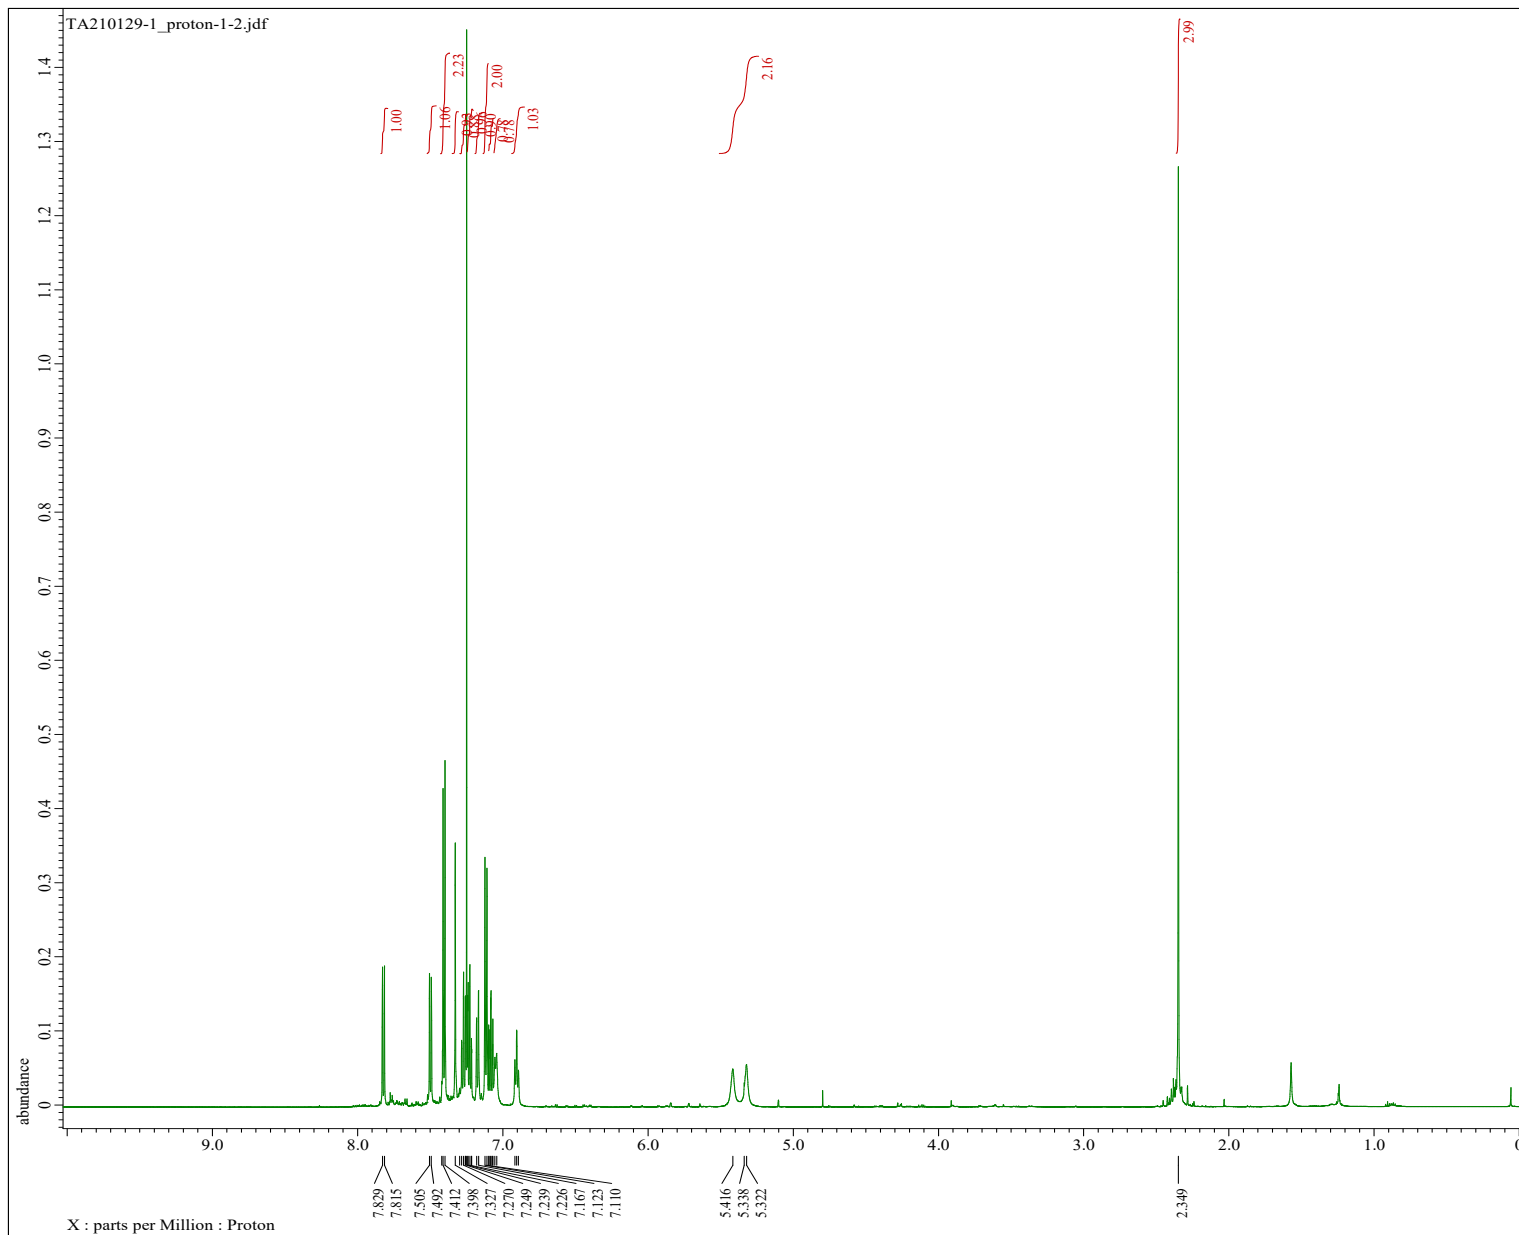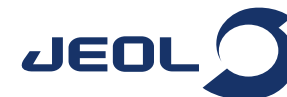

```

Filename      = TA210129-1_proton-1-2
Author       = delta
Experiment   = proton.jxp
Sample_Id    = TA210129-1
Solvent      = CHLOROFORM-D
Actual_Start_Time = 29-JAN-2021 21:22:53
Revision_Time  = 29-JAN-2021 21:25:57

Comment      = 2Cl-Bz-acetonitrile
Data_Format  = 1D COMPLEX
Dim_Size     = 13107
X_Domain     = Proton
Dim_Title    = Proton
Dim_Units    = [ppm]
Dimensions   = X
Spectrometer = JNM-ECZ600R/S3

Field_Strength = 14.09636928[T] (600[M]
X_Acq_Duration = 1.4548992[s]
X_Domain       = Proton
X_Freq         = 600.1723046[MHz]
X_Offset       = 5[ppm]
X_Points       = 16384
X_Prescans     = 1
X_Resolution   = 0.68733284[Hz]
X_Sweep        = 11.26126126[kHz]
X_Sweep_Clipped = 9.00909091[kHz]
Irr_Domain     = Proton
Irr_Freq       = 600.1723046[MHz]
Irr_Offset     = 5[ppm]
Tri_Domain     = Proton
Tri_Freq       = 600.1723046[MHz]
Tri_Offset     = 5[ppm]
Blanking       = 5[us]
Clipped        = FALSE
Scans          = 16
Total_Scans    = 16

Relaxation_Delay = 5[s]
Recvr_Gain       = 36
Temp_Gst         = 20.2[dC]
X_90_Width       = 9.5[us]
X_Acq_Time       = 1.4548992[s]
X_Angle          = 45[deg]
X_Attn           = 8.1[dB]
X_Pulse          = 4.75[us]
Irr_Mode         = Off
Tri_Mode         = Off
Dante_Loop       = 500
Dante_Presat     = FALSE
Decimation_Rate = 0
Experiment_Path  = c:\Program Files\JEOL
Initial_Wait     = 1[s]
Phase            = (0, 90, 270, 180, 180)
Presat_Time      = 5[s]
Presat_Time_Flag = FALSE
Relaxation_Delay_Calc = 0[s]
Relaxation_Delay_Temp = 5[s]
Repetition_Time  = 6.4548992[s]

```

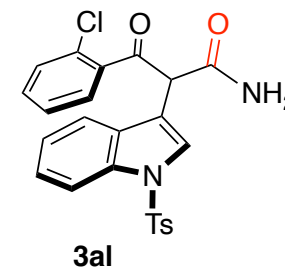



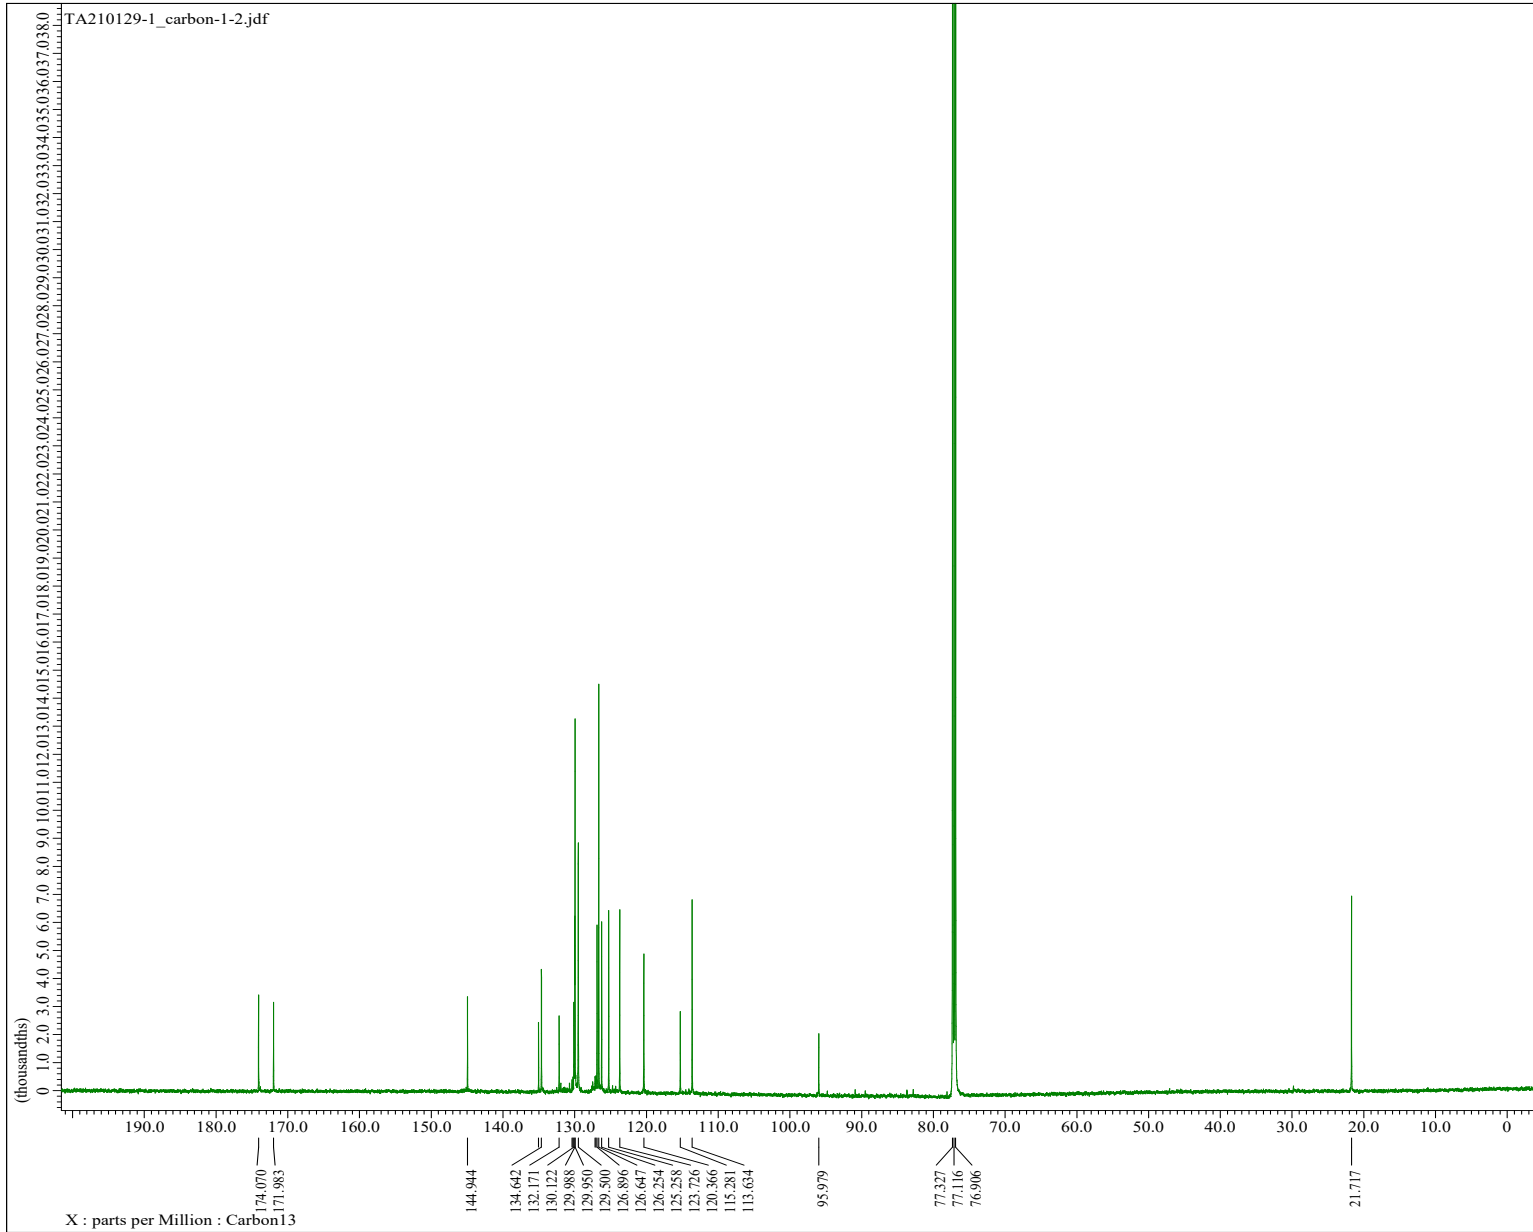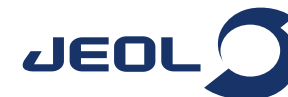

```

Filename      = TA210129-1_carbon-
Author       = delta
Experiment   = carbon_jxp
Sample_Id    = TA210129-1
Solvent      = CHLOROFORM-D
Actual_Start_Time = 29-JAN-2021 21:27:
Revision_Time = 30-JAN-2021 09:04:

Comment      = 2C1-Bz-acetonitril
Data_Format  = ID_COMPLEX
Dim_Size     = 26214
X_Domain     = Carbon13
Dim_Title    = Carbon13
Dim_Units    = [ppm]
Dimensions   = X
Spectrometer = JNM-ECZ600R/S3

Field_Strength = 14.09636928 [T] (60
X_Acq_Duration = 0.69206016 [s]
X_Domain       = Carbon13
X_Freq         = 150.91343039 [MHz]
X_Offset       = 100 [ppm]
X_Points       = 32768
X_Fscans       = 4
X_Resolution   = 1.44496109 [Hz]
X_Sweep        = 47.34848485 [kHz]
X_Sweep_Clipped = 37.87878788 [kHz]
Irr_Domain     = Proton
Irr_Freq       = 600.1723046 [MHz]
Irr_Offset     = 5 [ppm]
Blanking       = 15 [us]
Clipped        = TRUE
Scans          = 4500
Total_Scans    = 4500

Relaxation_Delay = 1 [s]
Recvr_Gain       = 56
Temp_Get        = 20.4 [dC]
X_90_Width      = 8.8 [us]
X_Acq_Time      = 0.69206016 [s]
X_Angle         = 30 [deg]
X_Atn           = 11 [dB]
X_Pulse         = 2.93333333 [us]
Irr_Atn_Dec     = 26.162 [dB]
Irr_Atn_Dec_Calc = 26.162 [dB]
Irr_Atn_Dec_Default_Calc = 26.162 [dB]
Irr_Atn_Noise   = 26.162 [dB]
Irr_Dec_Bandwidth_Hz = 7.23684211 [kHz]
Irr_Dec_Bandwidth_Fpm = 12.05794078 [ppm]
Irr_Dec_Freq    = 600.1723046 [MHz]
Irr_Dec_Merit_Factor = 2.2
Irr_Decoupling = TRUE
Irr_Noise       = WALTZ
Irr_Offset_Default = 5 [ppm]
Irr_Pwidth      = 76 [us]
Irr_Pwidth_Default = 76 [us]
Irr_Pwidth_Default_Calc = 76 [us]
Irr_Pwidth_Temp1 = 76 [us]
Irr_Wurst       = FALSE
Declination_Rate = 0
Experiment_Path = c:\Program Files\J
Initial_Wait     = 1 [s]
Noe_Time         = 1 [s]
Noe_Time_Flag    = FALSE
Relaxation_Delay_Calc = 0 [s]
Relaxation_Delay_Temp = 1 [s]
Repetition_Time = 1.69206016 [s]

```

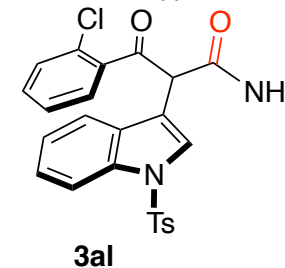

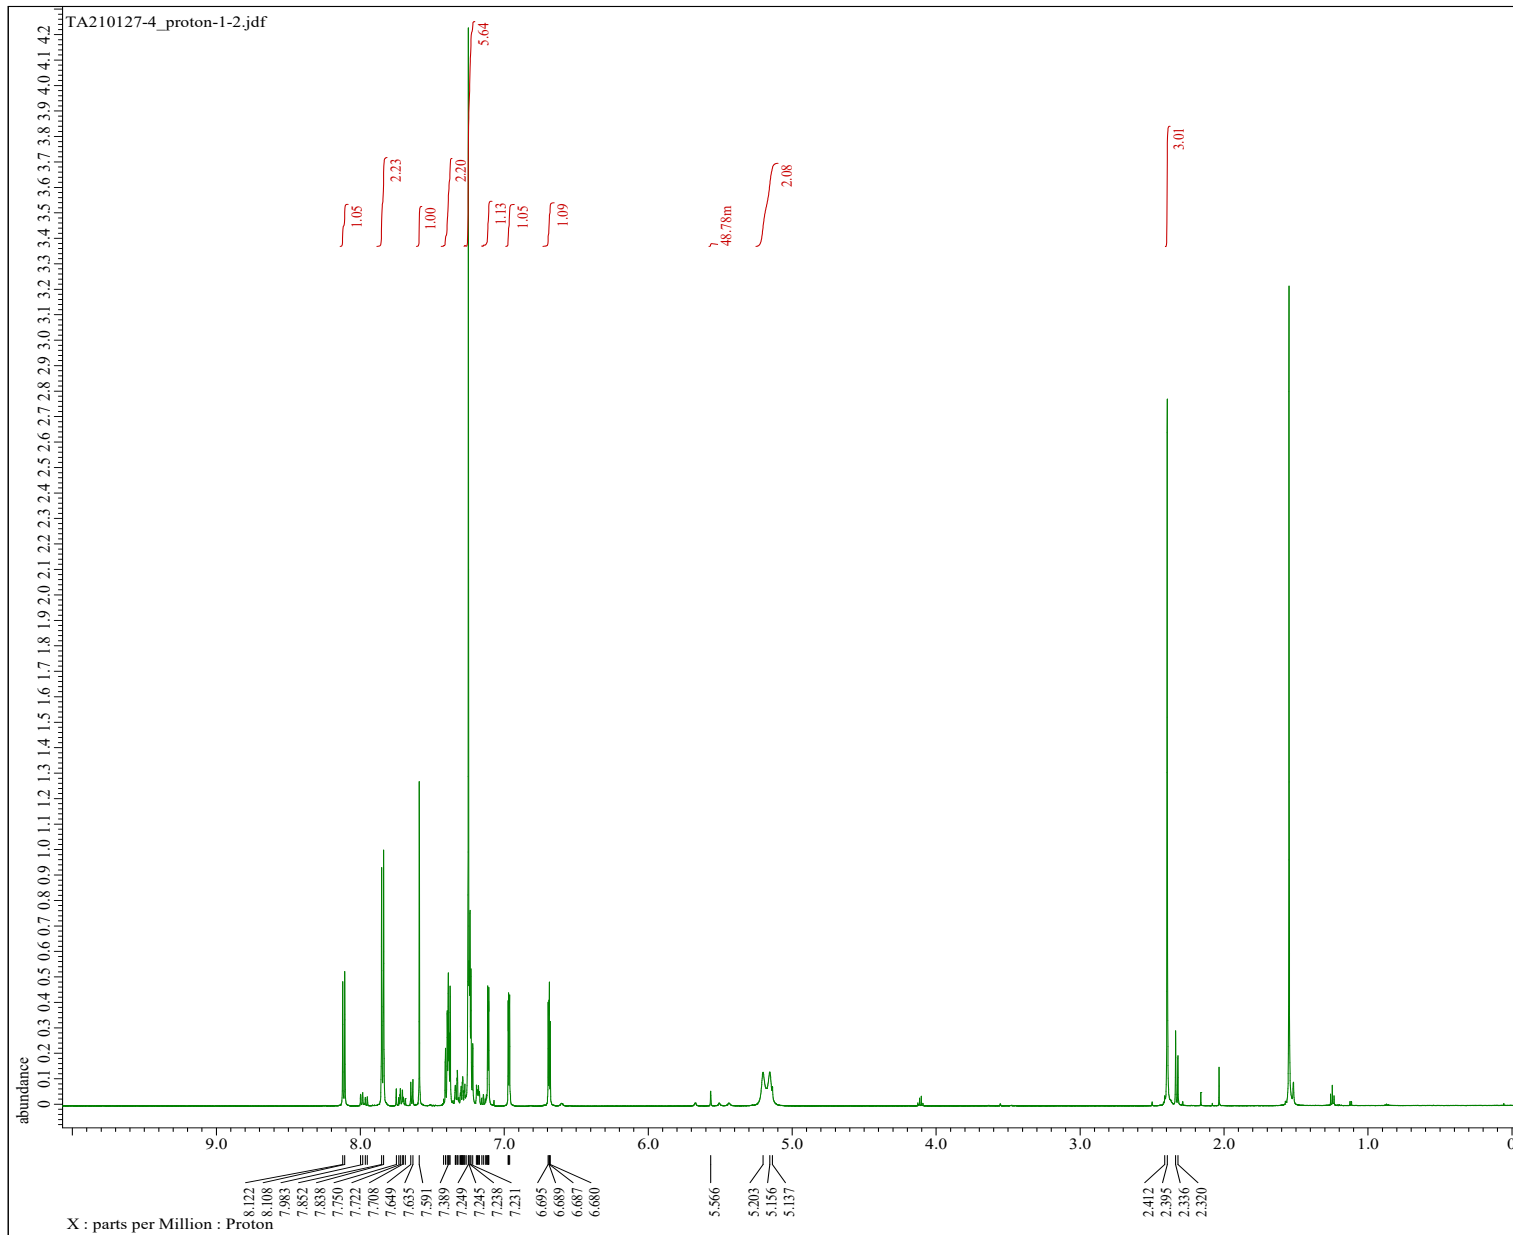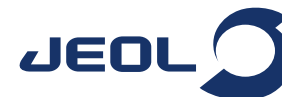

```

Filename      = TA210127-4_proton-1-2
Author       = delta
Experiment   = proton.jkp
Sample_Id    = TA210127-4
Solvent      = CHLOROFORM-D
Actual_Start_Time = 27-JAN-2021 21:12:11
Revision_Time   = 27-JAN-2021 21:12:43

Comment      = thienyl
Data_Format   = 1D COMPLEX
Dim_Size     = 13107
X_Domain     = Proton
Dim_Title    = Proton
Dim_Units    = [ppm]
Dimensions   = X
Spectrometer  = JNM-ECZ600R/S3

Field_Strength = 14.09636928[T] (600[M
X_Acq_Duration = 1.4548992[s]
X_Domain      = Proton
X_Freq       = 600.1723046[MHz]
X_Offset     = 5[ppm]
X_Points     = 16384
X_Fscans     = 1
X_Resolution = 0.68733284[Hz]
X_Sweep      = 11.26126126[kHz]
X_Sweep_Clipped = 9.00900901[kHz]
Irr_Domain   = Proton
Irr_Freq     = 600.1723046[MHz]
Irr_Offset   = 5[ppm]
Tri_Domain   = Proton
Tri_Freq     = 600.1723046[MHz]
Tri_Offset   = 5[ppm]
Blanking     = FALSE
Clipped      = FALSE
Scans        = 8
Total_Scans  = 8

Relaxation_Delay = 5[s]
Recvr_Gain       = 56
Temp_Set         = 21[dc]
X_90_Width      = 9.5[us]
X_Acq_Time      = 1.4548992[s]
X_Angle         = 45[deg]
X_Attn          = 8.1[db]
X_Pulse         = 4.75[us]
Irr_Mode        = Off
Tri_Mode        = Off
Dante_Loop     = 500
Dante_Presat   = FALSE
Decimation_Rate = 0
Experiment_Path = c:\Program Files\JEOL
Initial_Wait    = 1[s]
Phase          = {0, 90, 270, 180, 180}
Preset_Time     = 5[s]
Preset_Time_Flag = FALSE
Relaxation_Delay_Calc = 0[s]
Relaxation_Delay_Temp = 5[s]
Repetition_Time = 6.4548992[s]
  
```

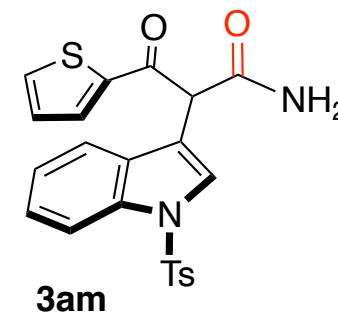

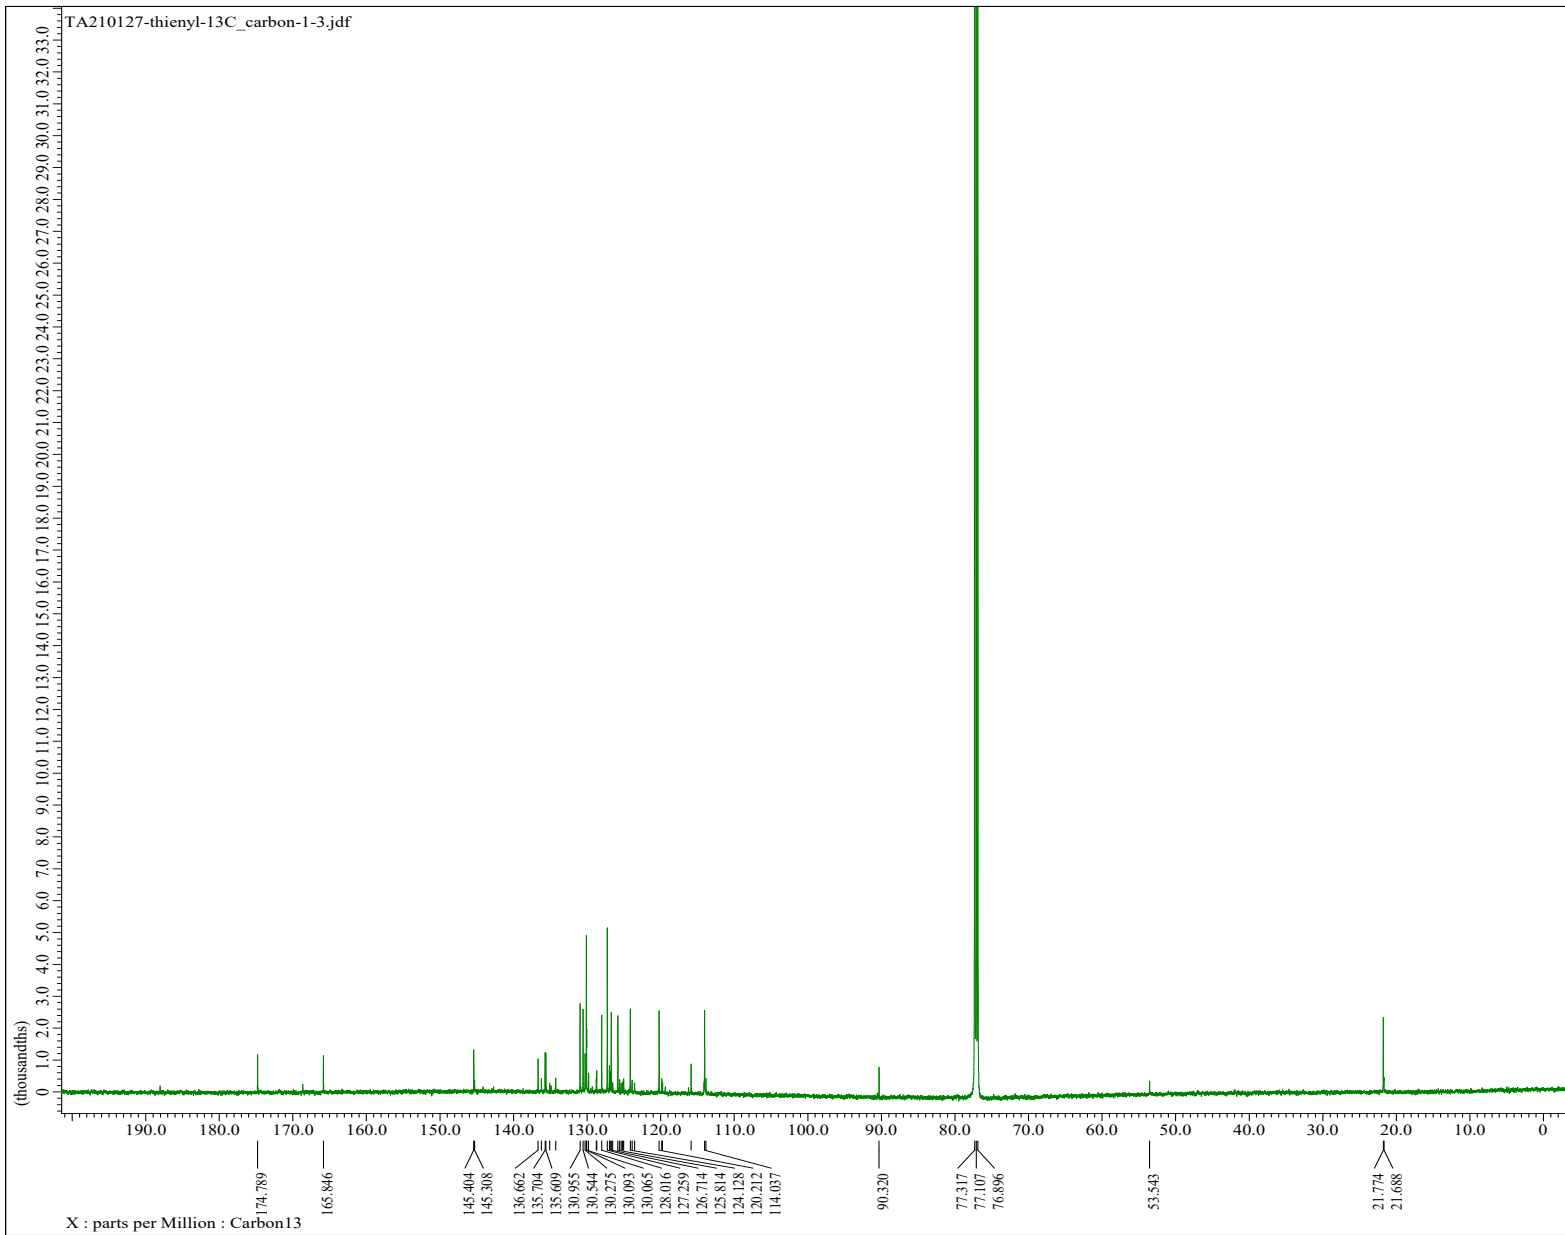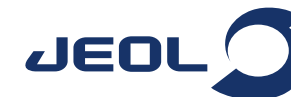

```

Filename           = TA210127-thienyl-1
Author             = delta
Experiment         = carbon_jxp
Sample_Id         = TA210127-thienyl-1
Solvent           = CHLOROFORM-D
Actual_Start_Time = 28-JAN-2021 20:11:
Revision_Time     = 28-JAN-2021 21:53:

Comment           = thienyl
Data_Format       = 1D COMPLEX
Dim_Size          = 26214
X_Domain          = Carbon13
Dim_Title         = Carbon13
Dim_Units         = [ppm]
Dimensions        = X
Spectrometer      = JNM-ECP600R/S3

Field_Strength    = 14.09636928[T] (60
X_Acq_Duration    = 0.69206016[s]
X_Domain          = Carbon13
X_Freq            = 150.91343039[MHz]
X_Offset          = 100[ppm]
X_Points          = 32768
X_Prescans        = 4
X_Resolution      = 1.44496109[Hz]
X_Sweep           = 47.34848485[kHz]
X_Sweep_Clipped  = 37.87878788[kHz]
Irr_Domain        = Proton
Irr_Freq          = 600.1723046[MHz]
Irr_Offset        = 5[ppm]
Blanking          = 15[us]
Clipped           = TRUE
Scans             = 3084
Total_Scans       = 3084

Relaxation_Delay  = 1[s]
Recvr_Gain        = 56
Temp_Get          = 20.6[dC]
X_90_Width        = 8.8[us]
X_Acq_Time        = 0.69206016[s]
X_Angle           = 30[deg]
X_Atn             = 11[db]
X_Pulse           = 2.93333333[us]
Irr_Atn_Dec       = 26.162[db]
Irr_Atn_Dec_Calc = 26.162[db]
Irr_Atn_Dec_Default_Calc = 26.162[db]
Irr_Atn_Noise    = 26.162[db]
Irr_Dec_Bandwidth_Hz = 7.23684211[kHz]
Irr_Dec_Bandwidth_Ppm = 12.05794078[ppm]
Irr_Dec_Freq      = 600.1723046[MHz]
Irr_Dec_Merit_Factor = 2.2
Irr_Decoupling   = TRUE
Irr_Noise         = WALTZ
Irr_Offset_Default = 5[ppm]
Irr_Width         = 76[us]
Irr_Width_Default = 76[us]
Irr_Width_Default_Calc = 76[us]
Irr_Width_Templ  = 76[us]
Irr_Wurst         = FALSE
Decimation_Rate   = 0
Experiment_Path   = c:\Program Files\J
Initial_Wait      = 1[s]
Noe_Time          = 1[s]
Noe_Time_Flag     = FALSE
Relaxation_Delay_Calc = 0[s]
Relaxation_Delay_Temp = 1[s]
Repetition_Time   = 1.69206016[s]

```

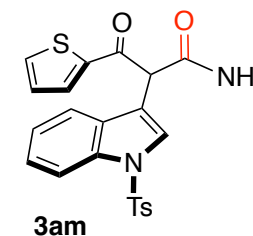

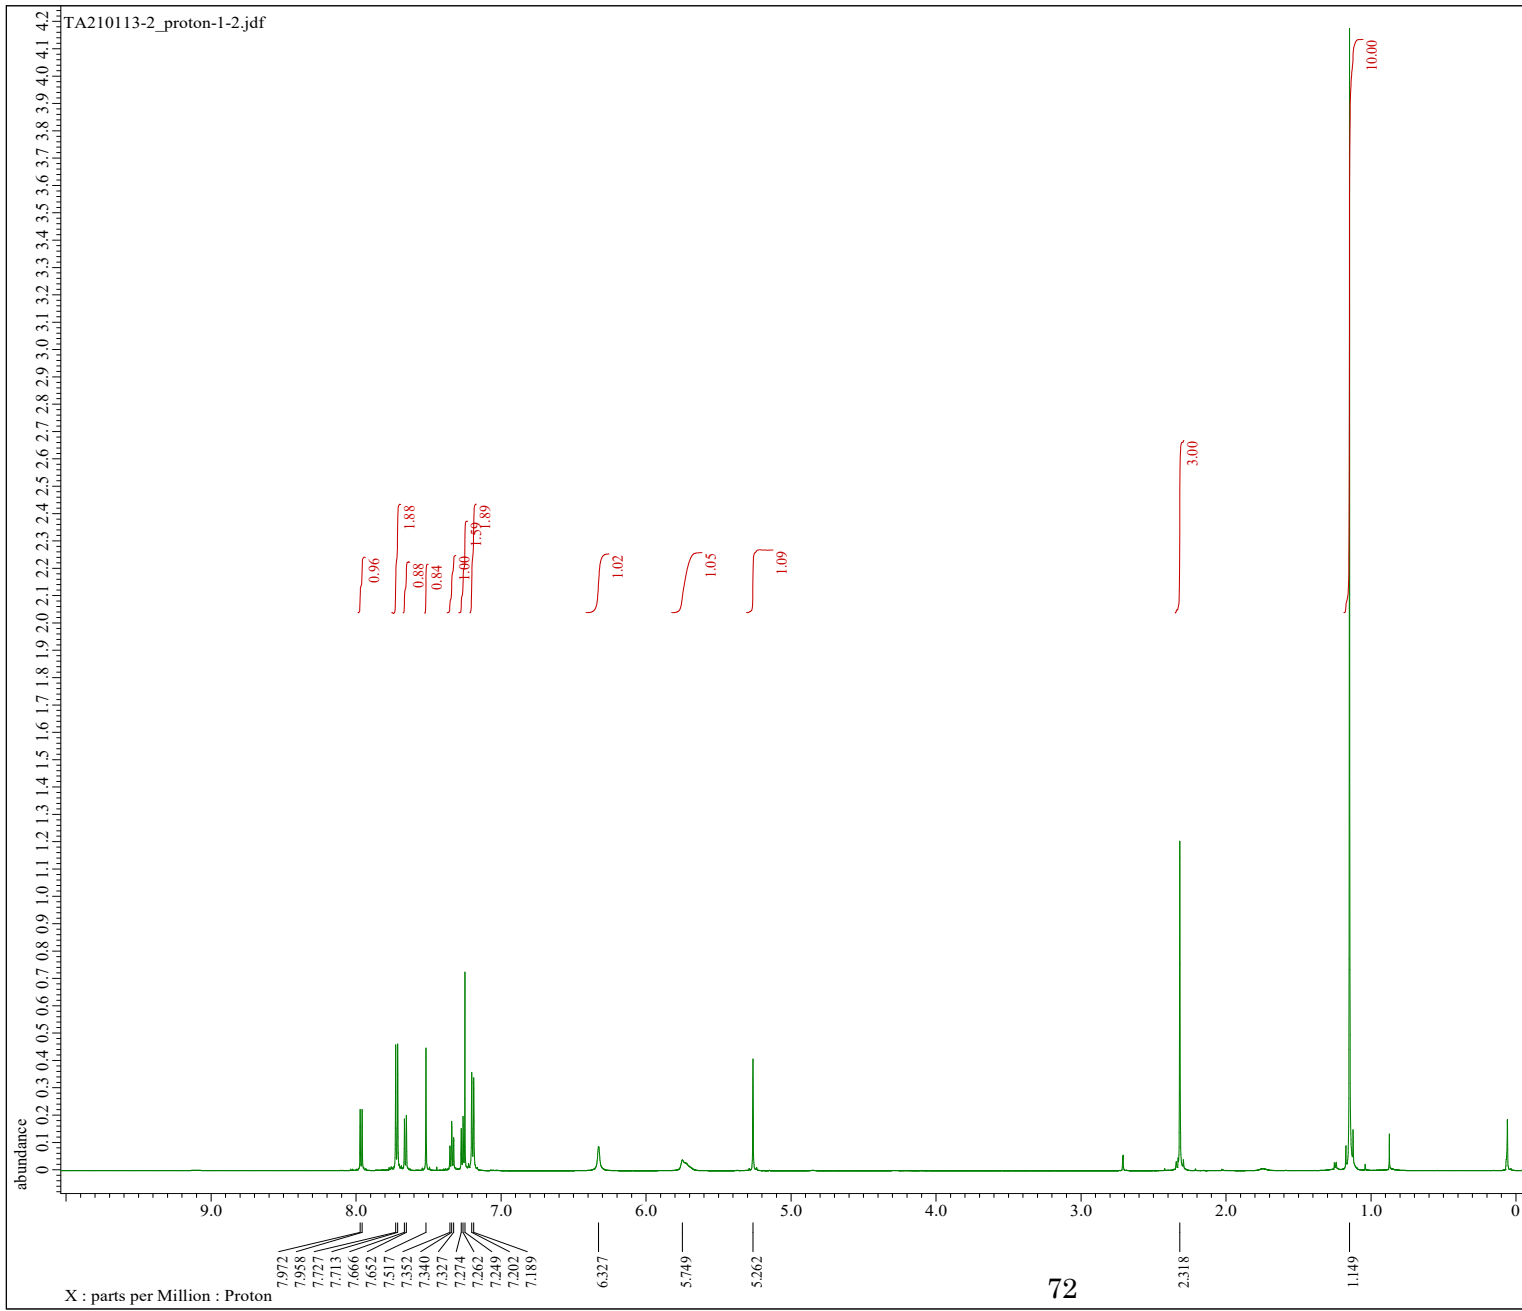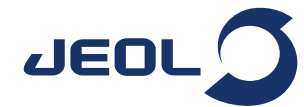

```

Filename      = TA210113-2_proton-1-2
Author       = delta
Experiment   = proton.jxp
Sample_Id    = TA210113-2
Solvent      = CHLOROFORM-D
Actual_Start_Time = 13-JAN-2021 20:36:14
Revision_Time = 13-JAN-2021 20:40:07

Comment      = Piv
Data_Format  = 1D COMPLEX
Dim_Size     = 13107
X_Domain    = Proton
Dim_Title   = Proton
Dim_Units   = [ppm]
Dimensions  = X
Spectrometer = JNM-ECZ600R/S3

Field_Strength = 14.09636928[T] (600[M]
X_Acq_Duration = 1.4548992[s]
X_Domain       = Proton
X_Freq         = 600.1723046[MHz]
X_Offset       = 5[ppm]
X_Points      = 16384
X_Prescans    = 1
X_Resolution  = 0.68733284[Hz]
X_Sweep       = 11.26126126[kHz]
X_Sweep_Clip  = 9.00900901[kHz]
Irr_Domain    = Proton
Irr_Freq      = 600.1723046[MHz]
Irr_Offset    = 5[ppm]
Tri_Domain    = Proton
Tri_Freq      = 600.1723046[MHz]
Tri_Offset    = 5[ppm]
Blanking      = FALSE
Clipped       = FALSE
Scans         = 16
Total_Scans   = 16

Relaxation_Delay = 5[s]
Recvr_Gain       = 26
Temp_Get        = 19.8[dC]
X_90_Width     = 9.5[us]
X_Acq_Time     = 1.4548992[s]
X_Angle        = 45[deg]
X_Atn          = 8.1[dB]
X_Pulse        = 4.75[us]
Irr_Mode       = OFF
Tri_Mode       = OFF
Dante_Loop     = 500
Dante_Presat  = FALSE
Decimation_Rate = 0
Experiment_Path = c:\Program Files\JEOL
Initial_Wait   = 1[s]
Phase         = {0, 90, 270, 180, 180}
Presat_Time   = 5[s]
Presat_Time_Flag = FALSE
Relaxation_Delay_Calc = 0[s]
Relaxation_Delay_Temp = 5[s]
Repetition_Time = 6.4548992[s]

```

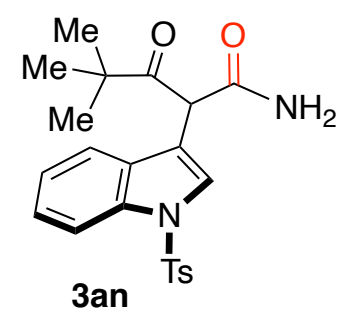

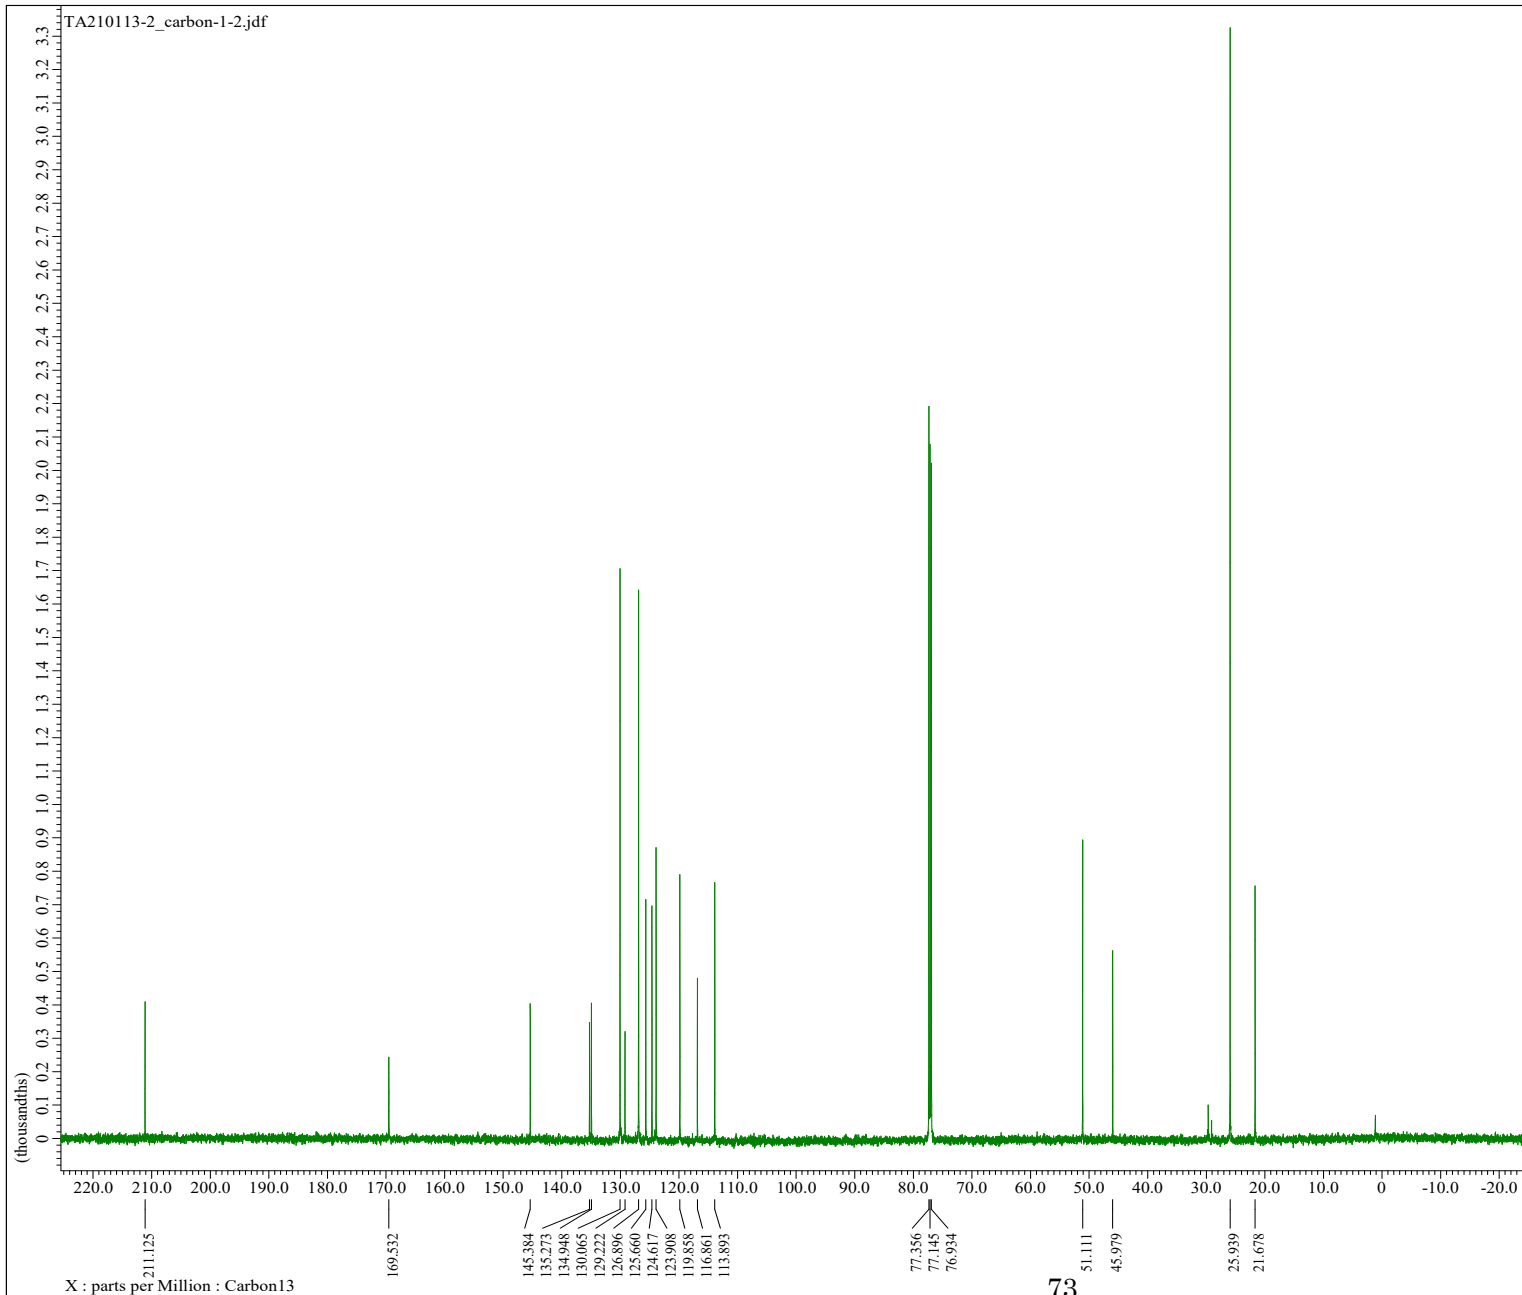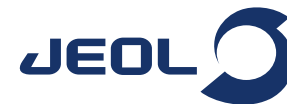

```

Filename      = TA210113-2_carbon-
Author       = delta
Experiment   = carbon.jxp
Sample_Id    = TA210113-2
Solvent      = CHLOROFORM-D
Actual_Start_Time = 13-JAN-2021 20:40:
Revision_Time  = 13-JAN-2021 21:23:

Comment      = single pulse decou
Data_Format  = 1D COMPLEX
Dim_Size     = 26214
X_Domain     = Carbon13
Dim_Title    = Carbon13
Dim_Units    = [ppm]
Dimensions   = X
Spectrometer = JNM-ECZ600R/S3

Field Strength = 14.09636928 [T] (60
X_Acq_Duration = 0.69206016[s]
X_Domain       = Carbon13
X_Freq         = 150.91343039[MHz]
X_Offset       = 100[ppm]
X_Points       = 32768
X_Prescans     = 4
X_Resolution   = 1.44496109[Hz]
X_Sweep        = 47.34848485[kHz]
X_Sweep_Clipped = 37.87878788[kHz]
Irr_Domain     = Proton
Irr_Freq       = 600.1723046 [MHz]
Irr_Offset     = 5[ppm]
Blanking       = 15[us]
Clipped        = TRUE
Scans          = 1351
Total_Scans    = 1351

Relaxation_Delay = 1[s]
Recvr_Gain       = 26
Temp_Get         = 19.7[dc]
X_90_Width       = 8.8[us]
X_Acq_Time       = 0.69206016[s]
X_Angle          = 30[deg]
X_Atn            = 11[db]
X_Pulse          = 2.93333333[us]
Irr_Atn_Dec      = 26.162[db]
Irr_Atn_Dec_Calc = 26.162[db]
Irr_Atn_Dec_Default_Calc = 26.162[db]
Irr_Atn_Noise   = 26.162[db]
Irr_Dec_Bandwidth_Hz = 7.23684211[kHz]
Irr_Dec_Bandwidth_Ppm = 12.05794078[ppm]
Irr_Dec_Freq     = 600.1723046 [MHz]
Irr_Dec_Merit_Factor = 2.2
Irr_Decoupling  = TRUE
Irr_Noise       = TRUE
Irr_Noise       = WALTZ
Irr_Offset_Default = 5[ppm]
Irr_Width       = 76[us]
Irr_Width_Default = 76[us]
Irr_Width_Default_Calc = 76[us]
Irr_Width_Templ = 76[us]
Irr_Wurst       = FALSE
Decimation_Rate = 0
Experiment_Path = c:\Program Files\J
Initial_Wait     = 1[s]
Noe_Time         = 1[s]
Noe_Time_Flag    = FALSE
Relaxation_Delay_Calc = 0[s]
Relaxation_Delay_Temp = 1[s]
Repetition_Time  = 1.69206016[s]
  
```

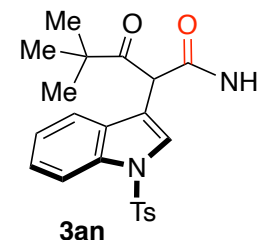

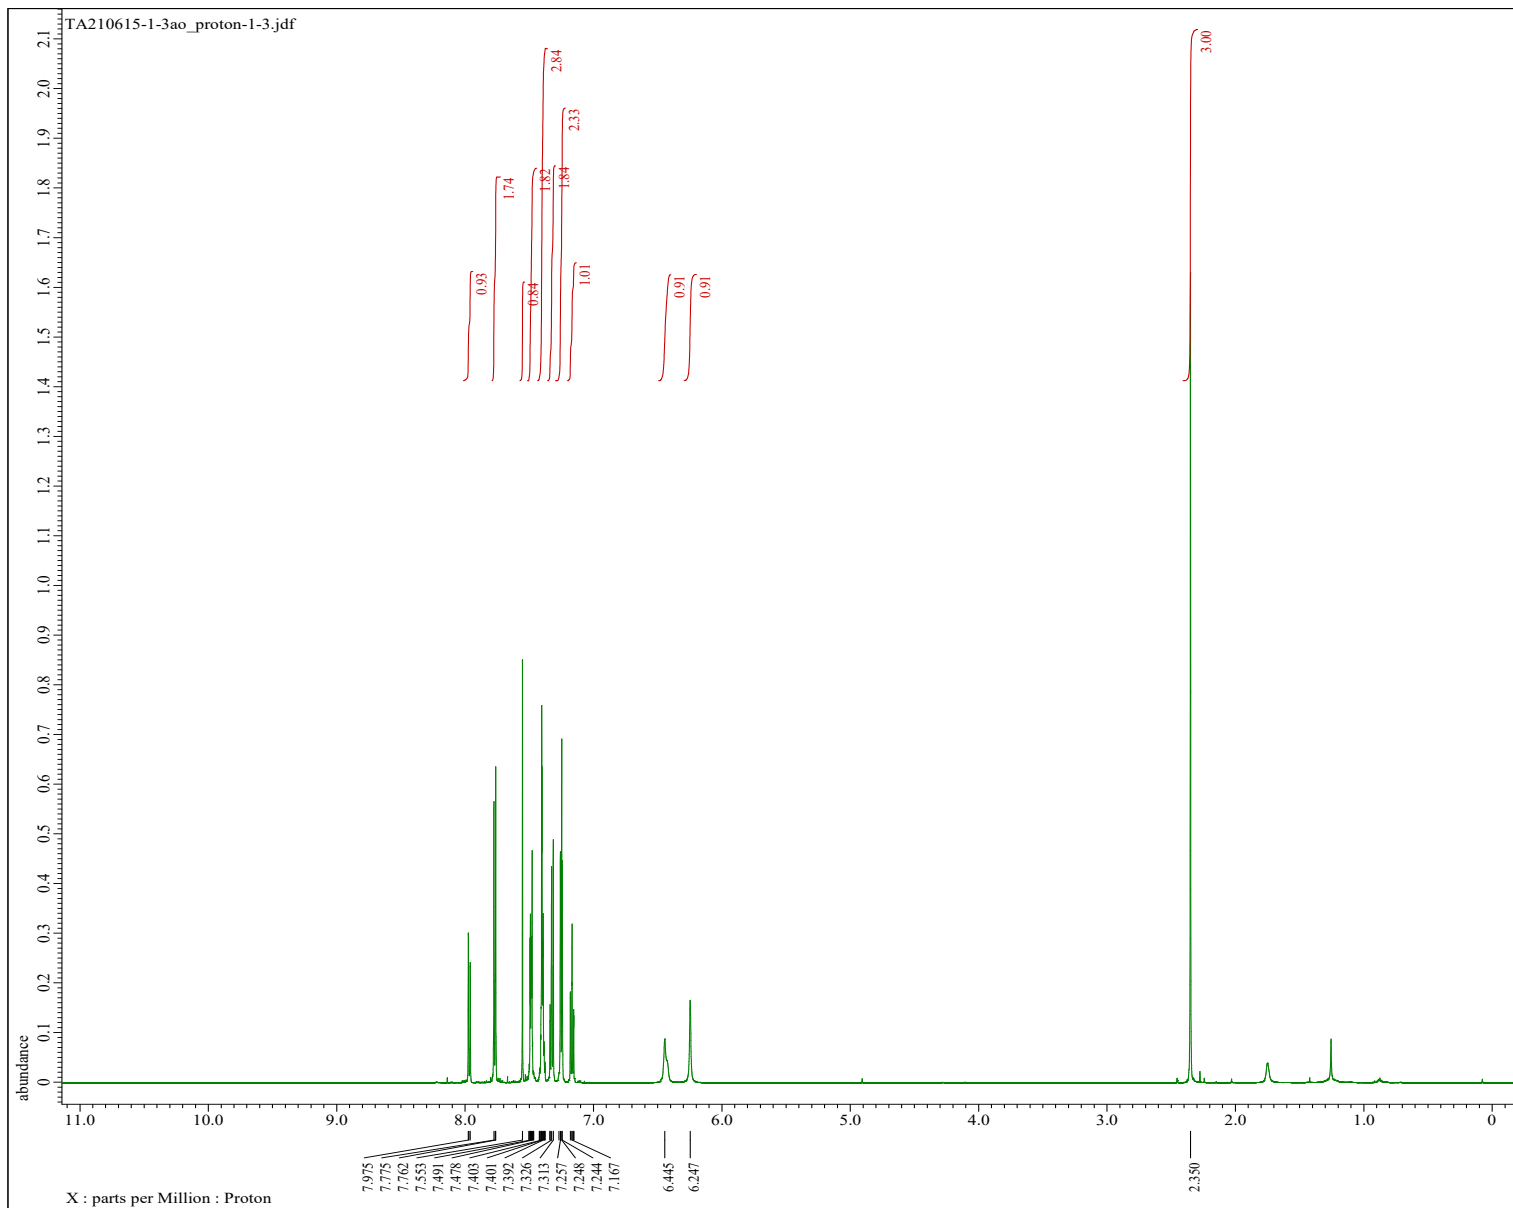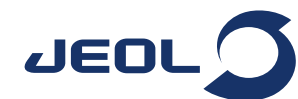

```

Filename      = TA210615-1-3ao_proton
Author       = delta
Experiment   = proton_jxp
Sample Id    = TA210615-1-3ao
Solvent      = CHLOROFORM-D
Actual_Start_Time = 15-JUN-2021 21:08:02
Revision_Time   = 15-JUN-2021 21:07:16

Comment      = 3ao-re-purification
Data Format   = 1D_COMPLEX
Dim Size     = 26214
X_Domain    = Proton
Dim Title    = Proton
Dim Units   = [ppm]
Dimensions  = X
Spectrometer = JNM-ECZ600R/S3

Field Strength = 14.09636928[T] (600[M]
X_Acq_Duration = 2.18103808[s]
X_Domain      = Proton
X_Freq       = 600.1723046[MHz]
X_Offset     = 5 [ppm]
X_Points     = 32768
X_Prescans   = 1
X_Resolution = 0.45849727 [Hz]
X_Sweep     = 15.02403846 [kHz]
X_Sweep_Clipped = 12.01923077 [kHz]
Irr_Domain   = Proton
Irr_Freq    = 600.1723046[MHz]
Irr_Offset  = 5 [ppm]
Tri_Domain   = Proton
Tri_Freq    = 600.1723046[MHz]
Tri_Offset  = 5 [ppm]
Blanking    = 2 [us]
Clipped     = FALSE
Scans       = 16
Total_Scans = 16

Relaxation_Delay = 1 [s]
Recvr_Gain       = 36
Temp_Get         = 20.7 [dC]
X_90_Width      = 7.7 [us]
X_Acq_Time      = 2.18103808 [s]
X_Angle         = 45 [deg]
X_Attn          = 8.1 [dB]
X_Pulse         = 3.85 [us]
Irr_Mode        = Off
Tri_Mode        = Off
Dante_Loop     = 100
Dante_Preset   = FALSE
Decimation_Rate = 0
Experiment_Path = c:\Program Files\JEOL
Initial_Wait    = 1 [s]
Phase           = (0, 90, 270, 180, 180)
Preset_Time     = 1 [s]
Preset_Time_Flag = FALSE
Relaxation_Delay_Calc = 0 [s]
Relaxation_Delay_Temp = 1 [s]
Repetition_Time = 3.18103808 [s]

```

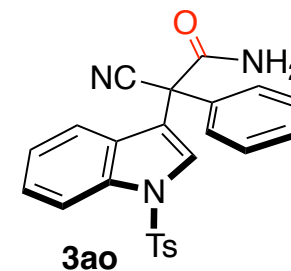

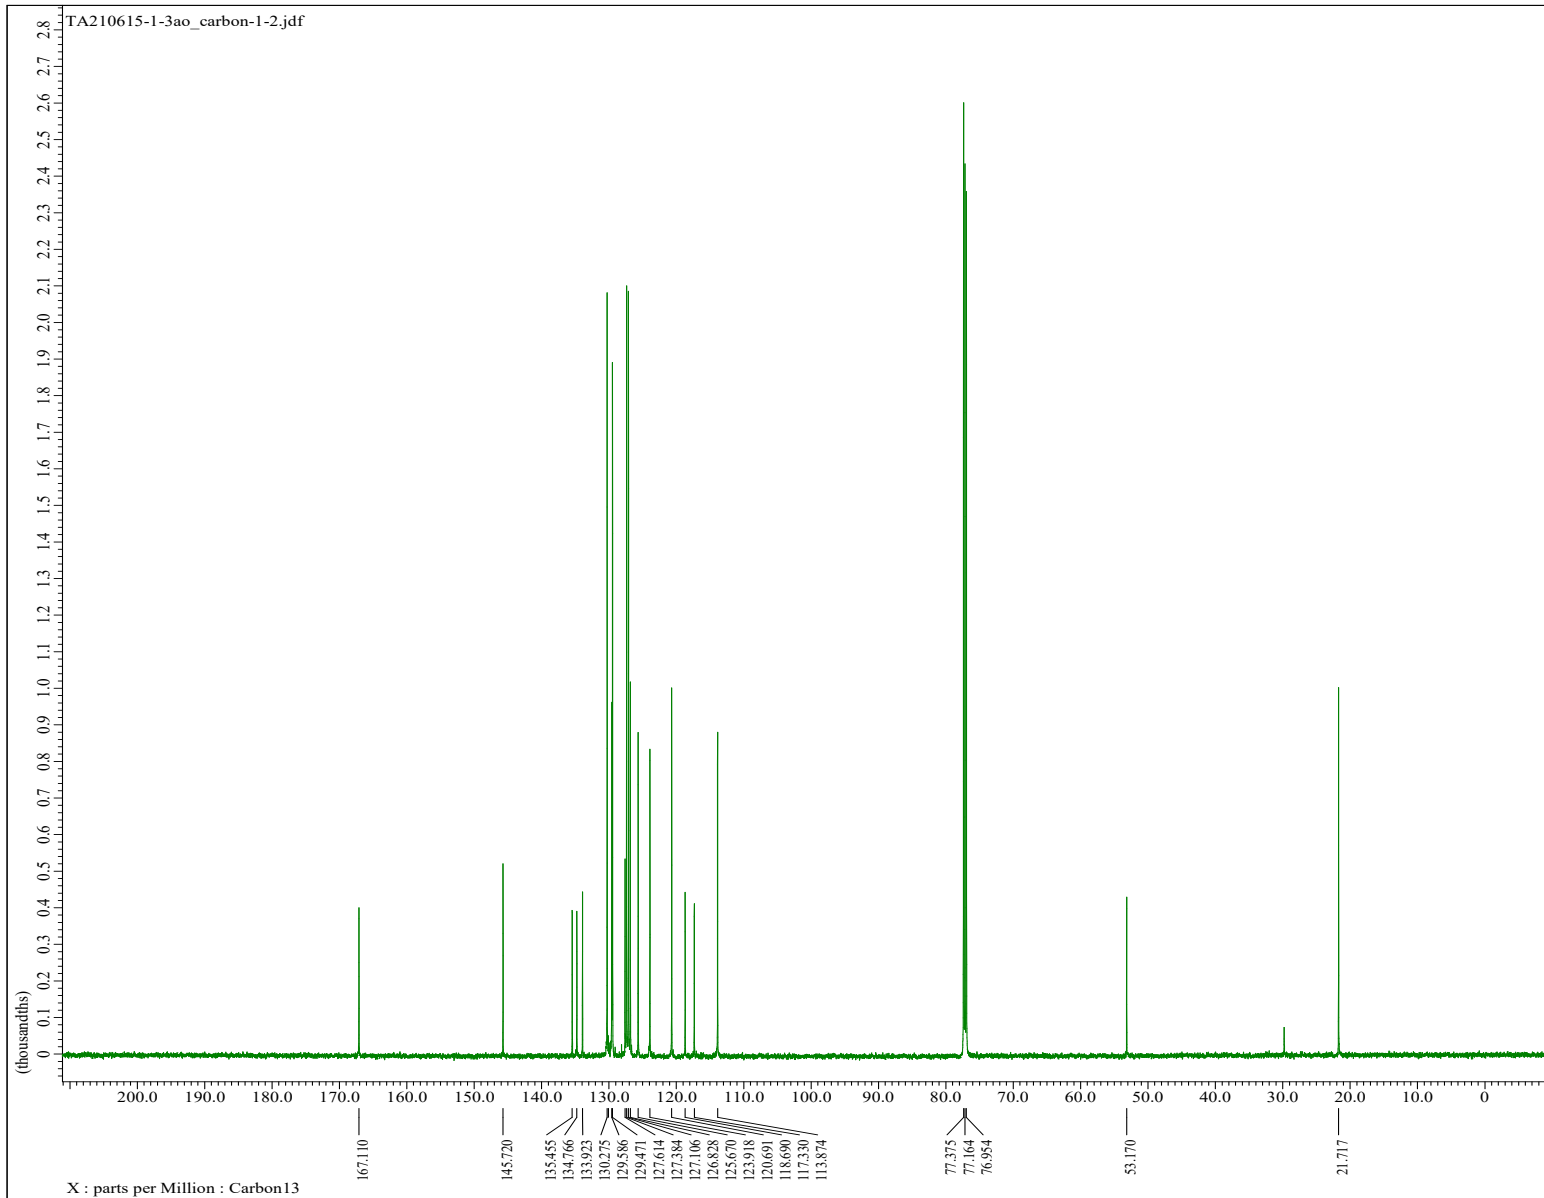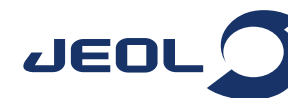

```

Filename      = TA210615-1-3ao_car
Author       = delta
Experiment   = carbon.jxp
Sample Id    = TA210615-1-3ao
Solvent      = CHLOROFORM-D
Actual Start Time = 15-JUN-2021 21:09:
Revision Time = 16-JUN-2021 09:23:

Comment      = 3ao-repurification
Data Format   = 1D COMPLEX
Dim Size     = 26214
X_Domain     = Carbon13
Dim_Title    = Carbon13
Dim_Units    = [ppm]
Dimensions   = X
Spectrometer = JNM-ECZ600R/S3

Field Strength = 14.09636928 [T] (60
X_Acq_Duration = 0.69206016 [s]
X_Domain       = Carbon13
X_Freq         = 150.91343039 [MHz]
X_Offset       = 100 [ppm]
X_Points       = 32768
X_Prescans     = 4
X_Resolution   = 1.44496109 [Hz]
X_Sweep        = 47.34848485 [kHz]
X_Sweep_Clipped = 37.87878788 [kHz]
Irr_Domain     = Proton
Irr_Freq       = 600.1723046 [MHz]
Irr_Offset     = 5 [ppm]
Blanking       = 2 [us]
Clipped        = FALSE
Scans          = 1736
Total_Scans    = 1736

Relaxation_Delay = 2 [s]
Recvr_Gain       = 26
Temp_Get         = 20.8 [dc]
X_90_Width      = 11.8 [us]
X_Acq_Time      = 0.69206016 [s]
X_Angle         = 30 [deg]
X_Atn           = 9.6 [dB]
X_Pulse         = 3.93333333 [us]
Irr_Atn_Dec     = 27.986 [dB]
Irr_Atn_Dec_Calc = 27.986 [dB]
Irr_Atn_Dec_Default_Calc = 27.986 [dB]
Irr_Atn_Noise   = 27.986 [dB]
Irr_Dec_Bandwidth_Hz = 7.23684211 [kHz]
Irr_Dec_Bandwidth_Ppm = 12.05794078 [ppm]
Irr_Dec_Freq    = 600.1723046 [MHz]
Irr_Dec_Merit_Factor = 2.2
Irr_Decoupling = TRUE
Irr_Noise       = TRUE
Irr_Noise       = WALTZ
Irr_Offset_Default = 5 [ppm]
Irr_Pwidth      = 76 [us]
Irr_Pwidth_Default = 76 [us]
Irr_Pwidth_Default_Calc = 76 [us]
Irr_Pwidth_Templ = 76 [us]
Irr_Wurst       = FALSE
Decimation_Rate = 0
Experiment_Path = c:\Program Files\J
Initial_Wait     = 1 [s]
Noe_Time         = 2 [s]
Noe_Time_Flag    = FALSE
Relaxation_Delay_Calc = 0 [s]
Relaxation_Delay_Temp = 2 [s]
Repetition_Time = 2.69206016 [s]

```

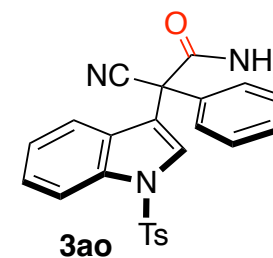

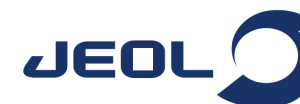

Filename = TA210104-4-1H13C\_prot  
Author = delta  
Experiment = proton.jxp  
Sample\_Id = TA210104-4-1H13C  
Solvent = CHLOROFORM-D  
Actual\_Start\_Time = 5-JAN-2021 02:20:16  
Revision\_Time = 5-JAN-2021 08:27:37  
Comment = single pulse-Ph-CN-CO  
Data\_Format = 1D\_COMPLEX  
Dim\_Size = 13107  
X\_Domain = Proton  
Dim\_Title = Proton  
Dim\_Units = [ppm]  
Dimensions = X  
Spectrometer = JNM-ECZ600R/S3  
Field\_strength = 14.09636928[T] (600[M]  
X\_Acq\_Duration = 1.4548992[s]  
X\_Domain = Proton  
X\_Freq = 600.1723046[MHz]  
X\_Offset = 5[ppm]  
X\_Points = 16384  
X\_Prescans = 1  
X\_Resolution = 0.68733284[Hz]  
X\_Sweep = 11.26126126[kHz]  
X\_Sweep\_Clippped = 9.00900901[kHz]  
Irr\_Domain = Proton  
Irr\_Freq = 600.1723046[MHz]  
Irr\_Offset = 5[ppm]  
Tri\_Domain = Proton  
Tri\_Freq = 600.1723046[MHz]  
Tri\_Offset = 5[ppm]  
Blanking = 5[us]  
Clipped = FALSE  
Scans = 16  
Total\_Scans = 16  
Relaxation\_Delay = 5[s]  
Recvr\_Gain = 36  
Temp\_Get = 21.3[dc]  
X\_90\_Width = 9.5[us]  
X\_Acq\_Time = 1.4548992[s]  
X\_Angle = 45[deg]  
X\_Attn = 8.1[dB]  
X\_Pulse = 4.75[us]  
Irr\_Mode = Off  
Tri\_Mode = Off  
Dante\_Loop = 500  
Dante\_Preset = FALSE  
Decimation\_Rate = 0  
Experiment\_Path = c:\Program Files\JEOL  
Initial\_Wait = 1[s]  
Phase = {0, 90, 270, 180, 180  
Preset\_Time = 5[s]  
Preset\_Time\_Flag = FALSE  
Relaxation\_Delay\_Calc = 0[s]  
Relaxation\_Delay\_Temp = 5[s]  
Repetition\_Time = 6.4548992[s]

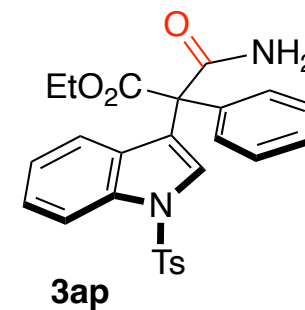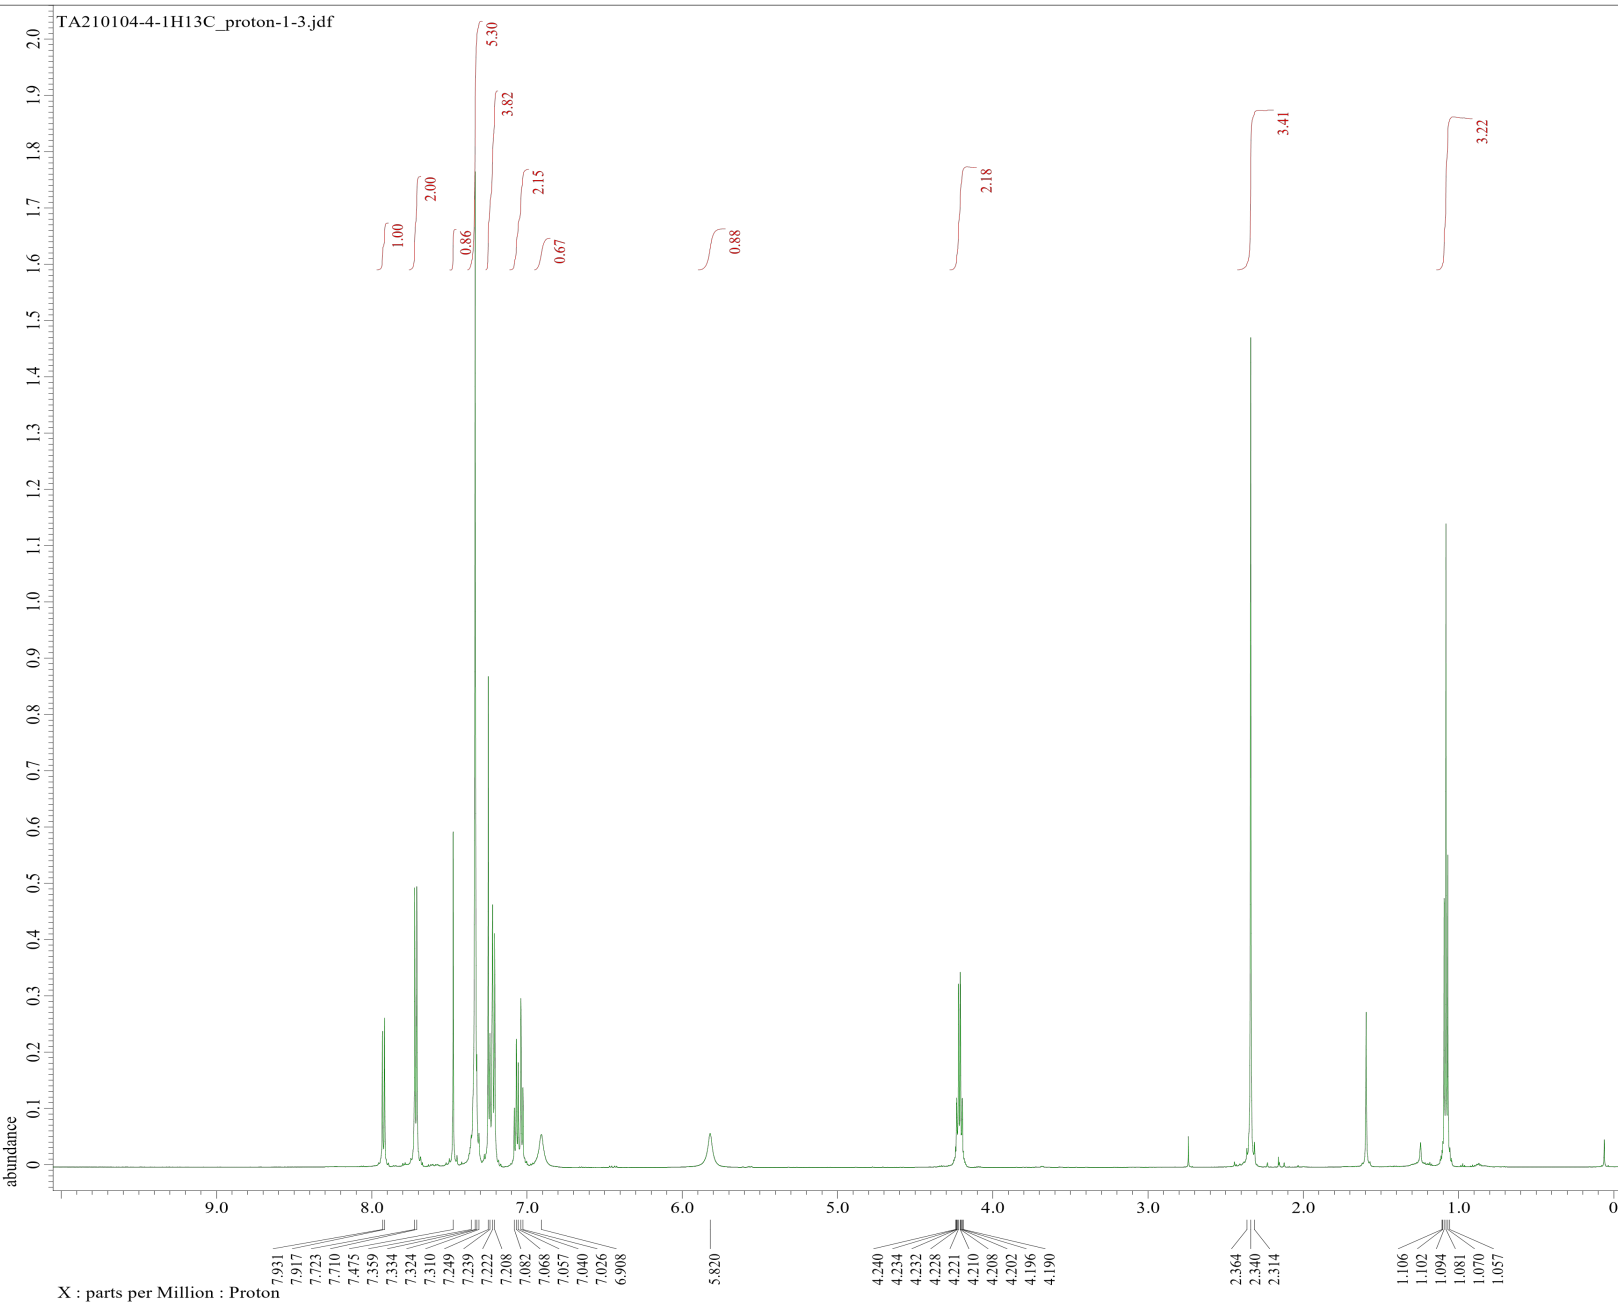



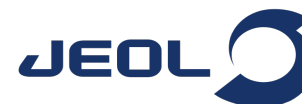

Filename = TA210104-4-1H13C\_c  
Author = delta  
Experiment = carbon.jxp  
Sample\_Id = TA210104-4-1H13C  
Solvent = CHLOROFORM-D  
Actual\_Start\_Time = 5-JAN-2021 02:25:  
Revision\_Time = 5-JAN-2021 08:11:  
Comment = single pulse decou  
Data\_Format = 1D\_COMPLEX  
Dim\_Size = 26214  
X\_Domain = Carbon13  
Dim\_Title = Carbon13  
Dim\_Units = [ppm]  
Dimensions = X  
Spectrometer = JNM-ECZ600R/S3  
Field\_Strength = 14.09636928 [T] (60  
X\_Acq\_Duration = 0.69206016 [s]  
X\_Domain = Carbon13  
X\_Freq = 150.91343039 [MHz]  
X\_Offset = 100 [ppm]  
X\_Points = 32768  
X\_Prescans = 4  
X\_Resolution = 1.44496109 [Hz]  
X\_Sweep = 47.34848485 [kHz]  
X\_Sweep\_Clipped = 37.87878788 [kHz]  
Irr\_Domain = Proton  
Irr\_Freq = 600.1723046 [MHz]  
Irr\_Offset = 5 [ppm]  
Blanking = 15 [us]  
Clipped = TRUE  
Scans = 10000  
Total\_Scans = 10000  
Relaxation\_Delay = 1 [s]  
Recvr\_Gain = 56  
Temp\_Get = 20.6 [dC]  
X\_90\_Width = 8.8 [us]  
X\_Acq\_Time = 0.69206016 [s]  
X\_Angle = 30 [deg]  
X\_Atn = 11 [dB]  
X\_Pulse = 2.93333333 [us]  
Irr\_Atn\_Dec = 26.162 [dB]  
Irr\_Atn\_Dec\_Calc = 26.162 [dB]  
Irr\_Atn\_Dec\_Default\_Calc = 26.162 [dB]  
Irr\_Atn\_Noise = 26.162 [dB]  
Irr\_Dec\_Bandwidth\_Hz = 7.23684211 [kHz]  
Irr\_Dec\_Bandwidth\_Ppm = 12.05794078 [ppm]  
Irr\_Dec\_Freq = 600.1723046 [MHz]  
Irr\_Dec\_Merit\_Factor = 2.2  
Irr\_Decoupling = TRUE  
Irr\_Noise = TRUE  
Irr\_Noise = WALTZ  
Irr\_Offset\_Default = 5 [ppm]  
Irr\_Pwidth = 76 [us]  
Irr\_Pwidth\_Default = 76 [us]  
Irr\_Pwidth\_Default\_Calc = 76 [us]  
Irr\_Pwidth\_Templ = 76 [us]  
Irr\_Wurst = FALSE  
Decimation\_Rate = 0  
Experiment\_Path = c:\Program Files\J  
Initial\_Wait = 1 [s]  
Noe\_Time = 1 [s]  
Noe\_Time\_Flag = FALSE  
Relaxation\_Delay\_Calc = 0 [s]  
Relaxation\_Delay\_Temp = 1 [s]  
Repetition\_Time = 1.69206016 [s]

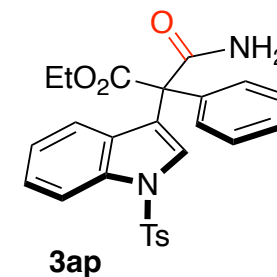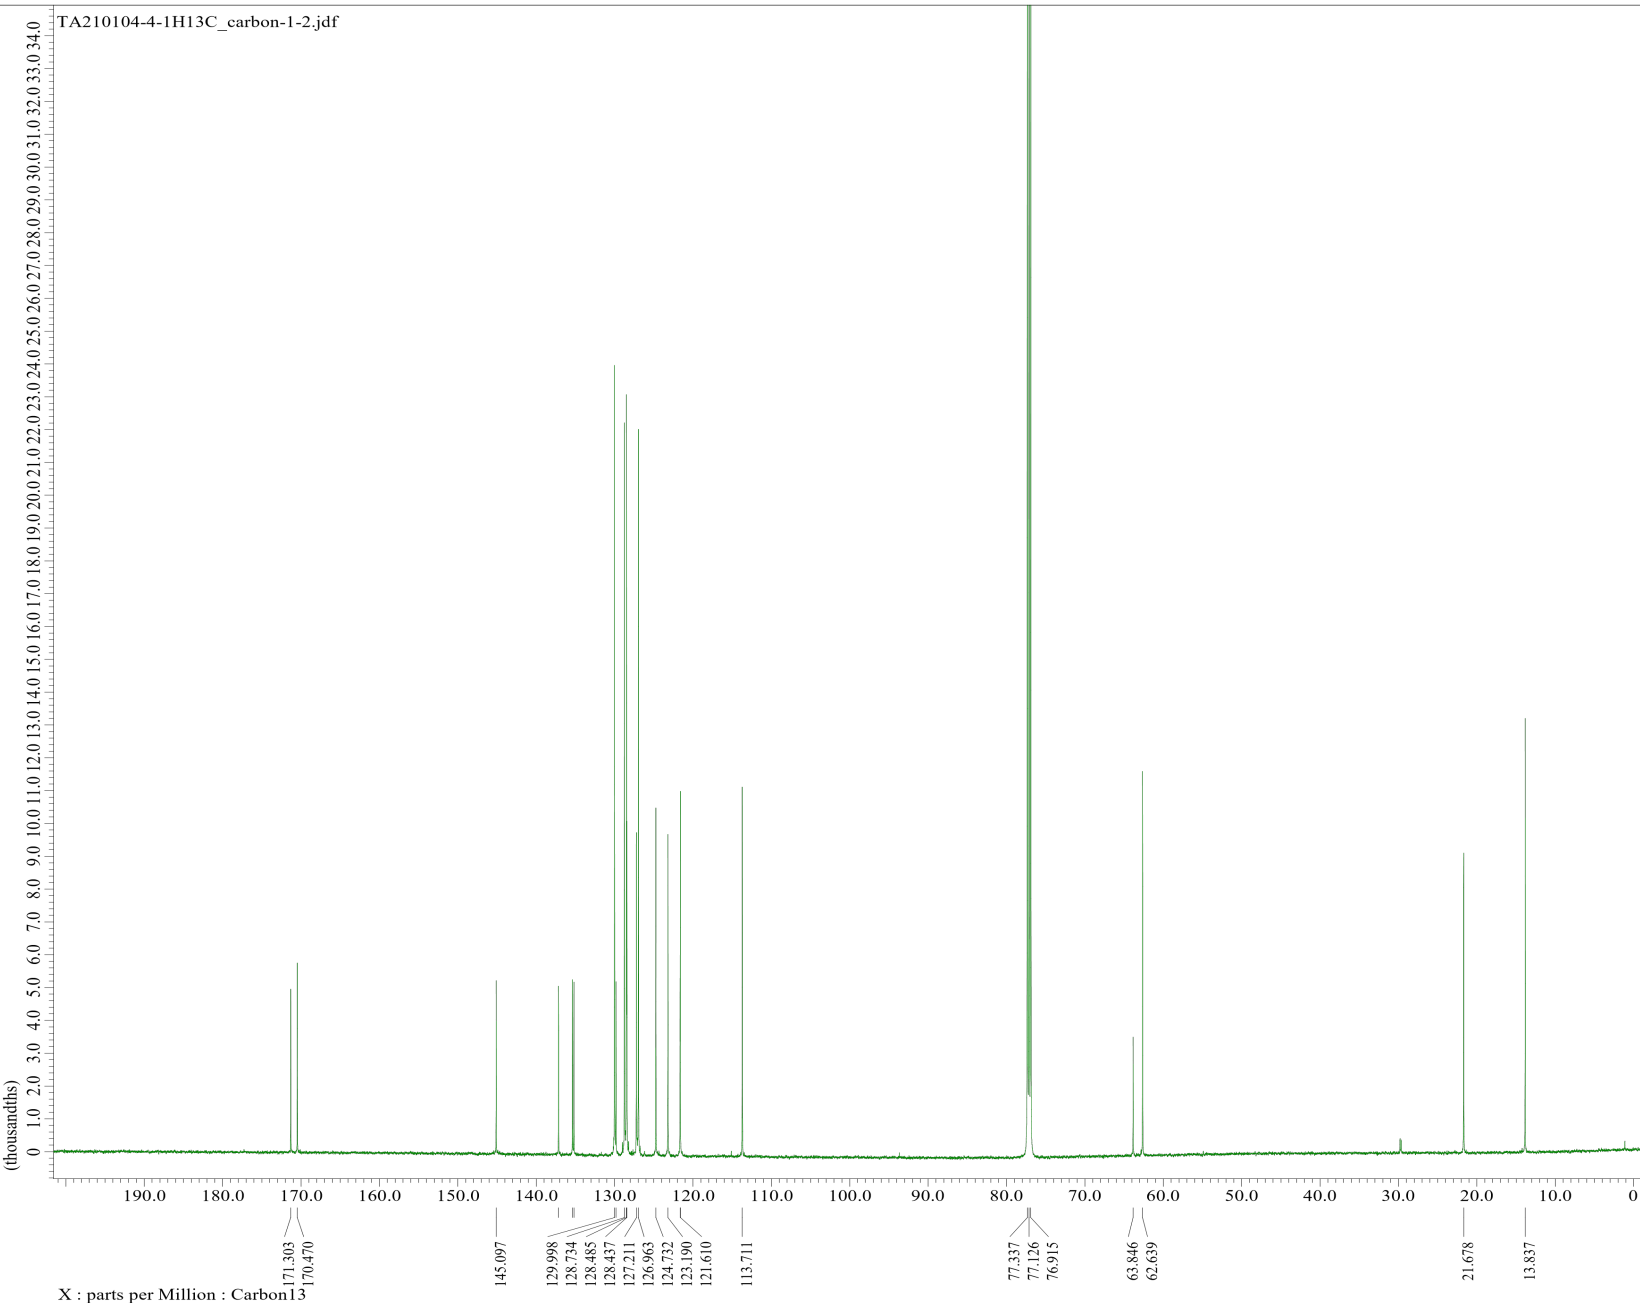

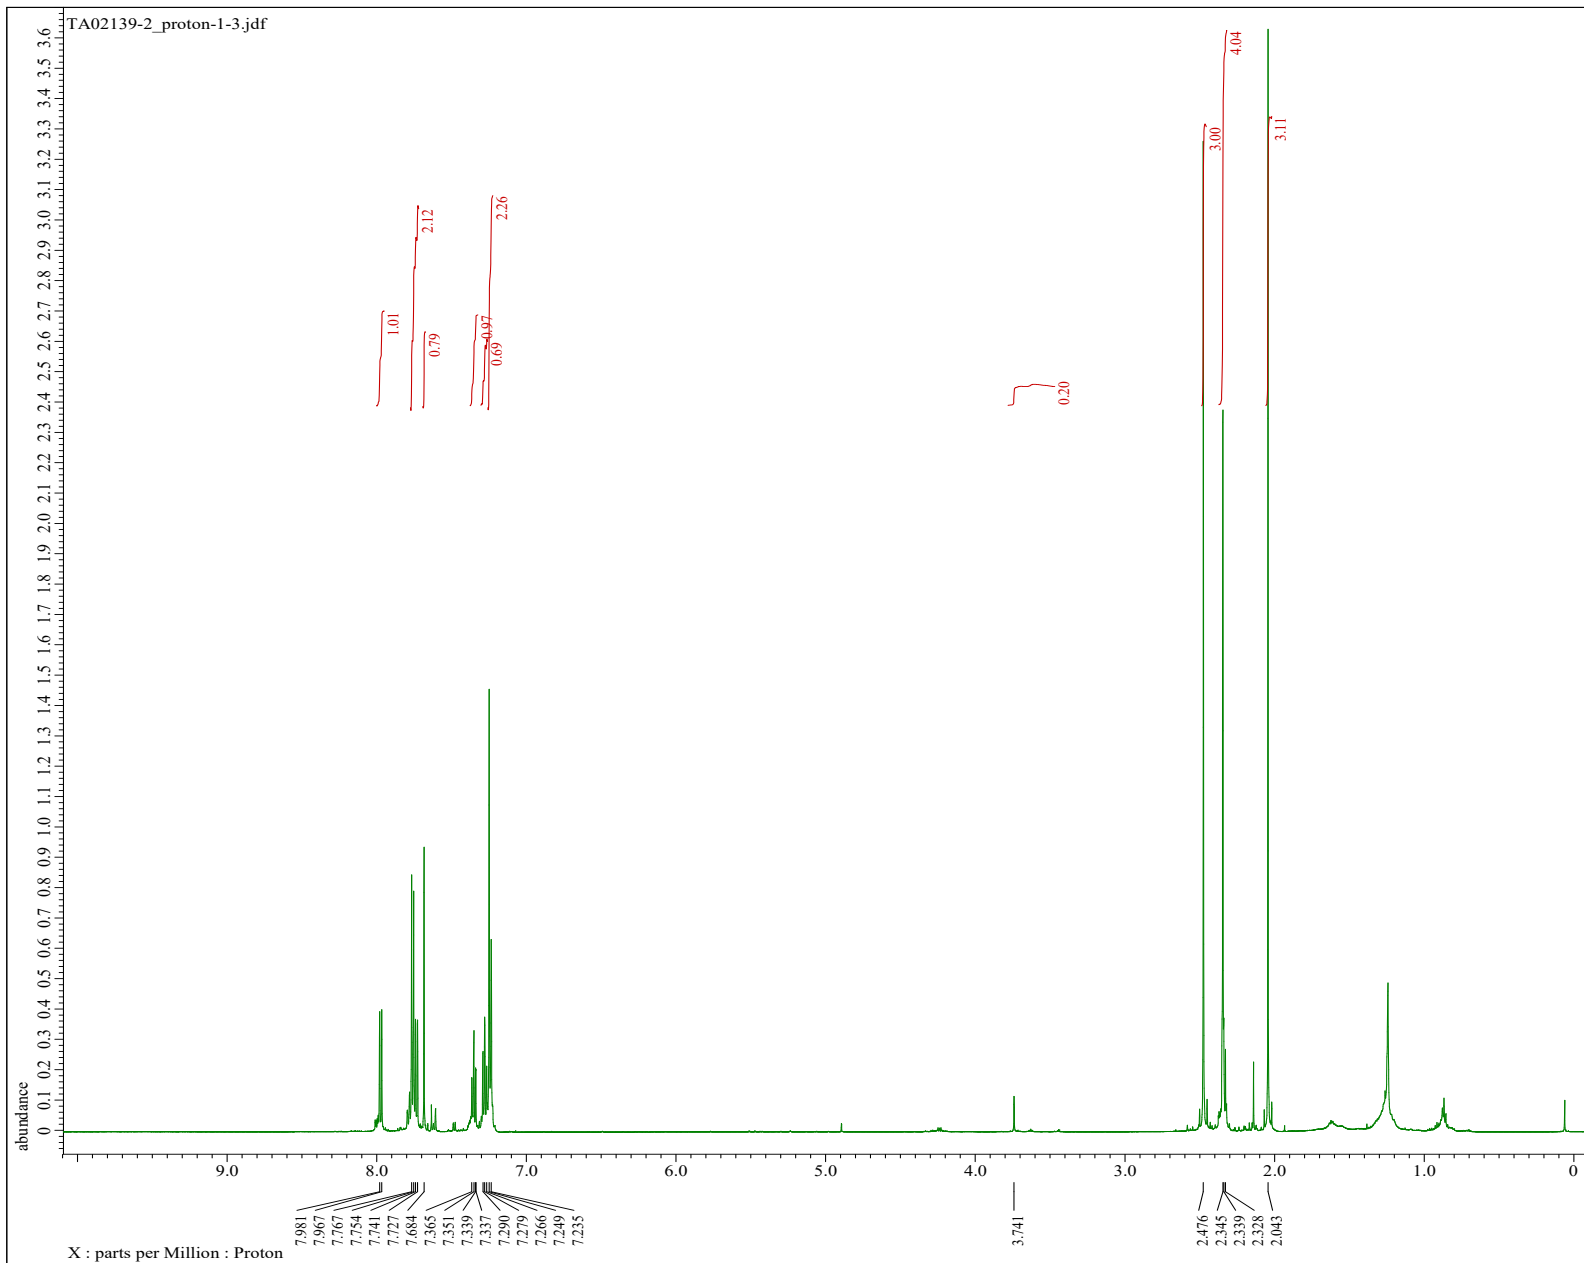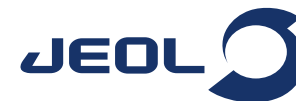

```

Filename      = TA02139-2_proton-1-3.
Author       = delta
Experiment   = proton.jxp
Sample_Id    = TA02139-2
Solvent      = CHLOROFORM-D
Actual_Start_Time = 14-DEC-2020 20:31:17
Revision_Time   = 14-DEC-2020 20:45:30

Comment      = single pulse-Ac-indol
Data Format   = 1D COMPLEX
Dim_Size     = 13107
X_Domain     = Proton
Dim_Title    = Proton
Dim_Units    = [ppm]
Dimensions   = X
Spectrometer = JNM-ECZ600R/S3

Field_Strength = 14.09636928[T] (600[M]
X_Acq_Duration = 1.45227776[s]
X_Domain       = Proton
X_Freq         = 600.1723046[MHz]
X_Offset       = 5[ppm]
X_Points       = 16384
X_Prescans     = 1
X_Resolution   = 0.68857351[Hz]
X_Sweep        = 11.28158845[kHz]
X_Sweep_Clipped = 9.02527076[kHz]
IRF_Domain     = Proton
IRF_Freq       = 600.1723046[MHz]
IRF_Offset     = 5[ppm]
Tri_Domain     = Proton
Tri_Freq       = 600.1723046[MHz]
Tri_Offset     = 5[ppm]
Blanking       = 5[us]
Clipped        = FALSE
Scans          = 8
Total_Scans    = 8

Relaxation_Delay = 5[s]
Recvr_Gain       = 36
Temp_Cet        = 20.6[dC]
X_90_Width      = 9.5[us]
X_Acq_Time      = 1.45227776[s]
X_Angle         = 45[deg]
X_Attn          = 8.4[dB]
X_Pulse         = 4.75[us]
IRF_Mode        = Off
Tri_Mode        = Off
Dante_Loop      = 500
Dante_Preset    = FALSE
Decimation_Rate = 0
Experiment_Path = c:\Program Files\JEOL
Initial_Wait     = 1[s]
Phase           = [0, 90, 270, 180, 180]
Preset_Time     = 5[s]
Preset_Time_Flag = FALSE
Relaxation_Delay_Calc = 0[s]
Relaxation_Delay_Temp = 5[s]
Repetition_Time = 6.45227776[s]
  
```

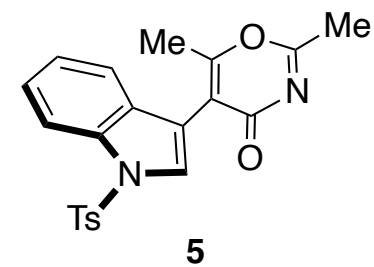

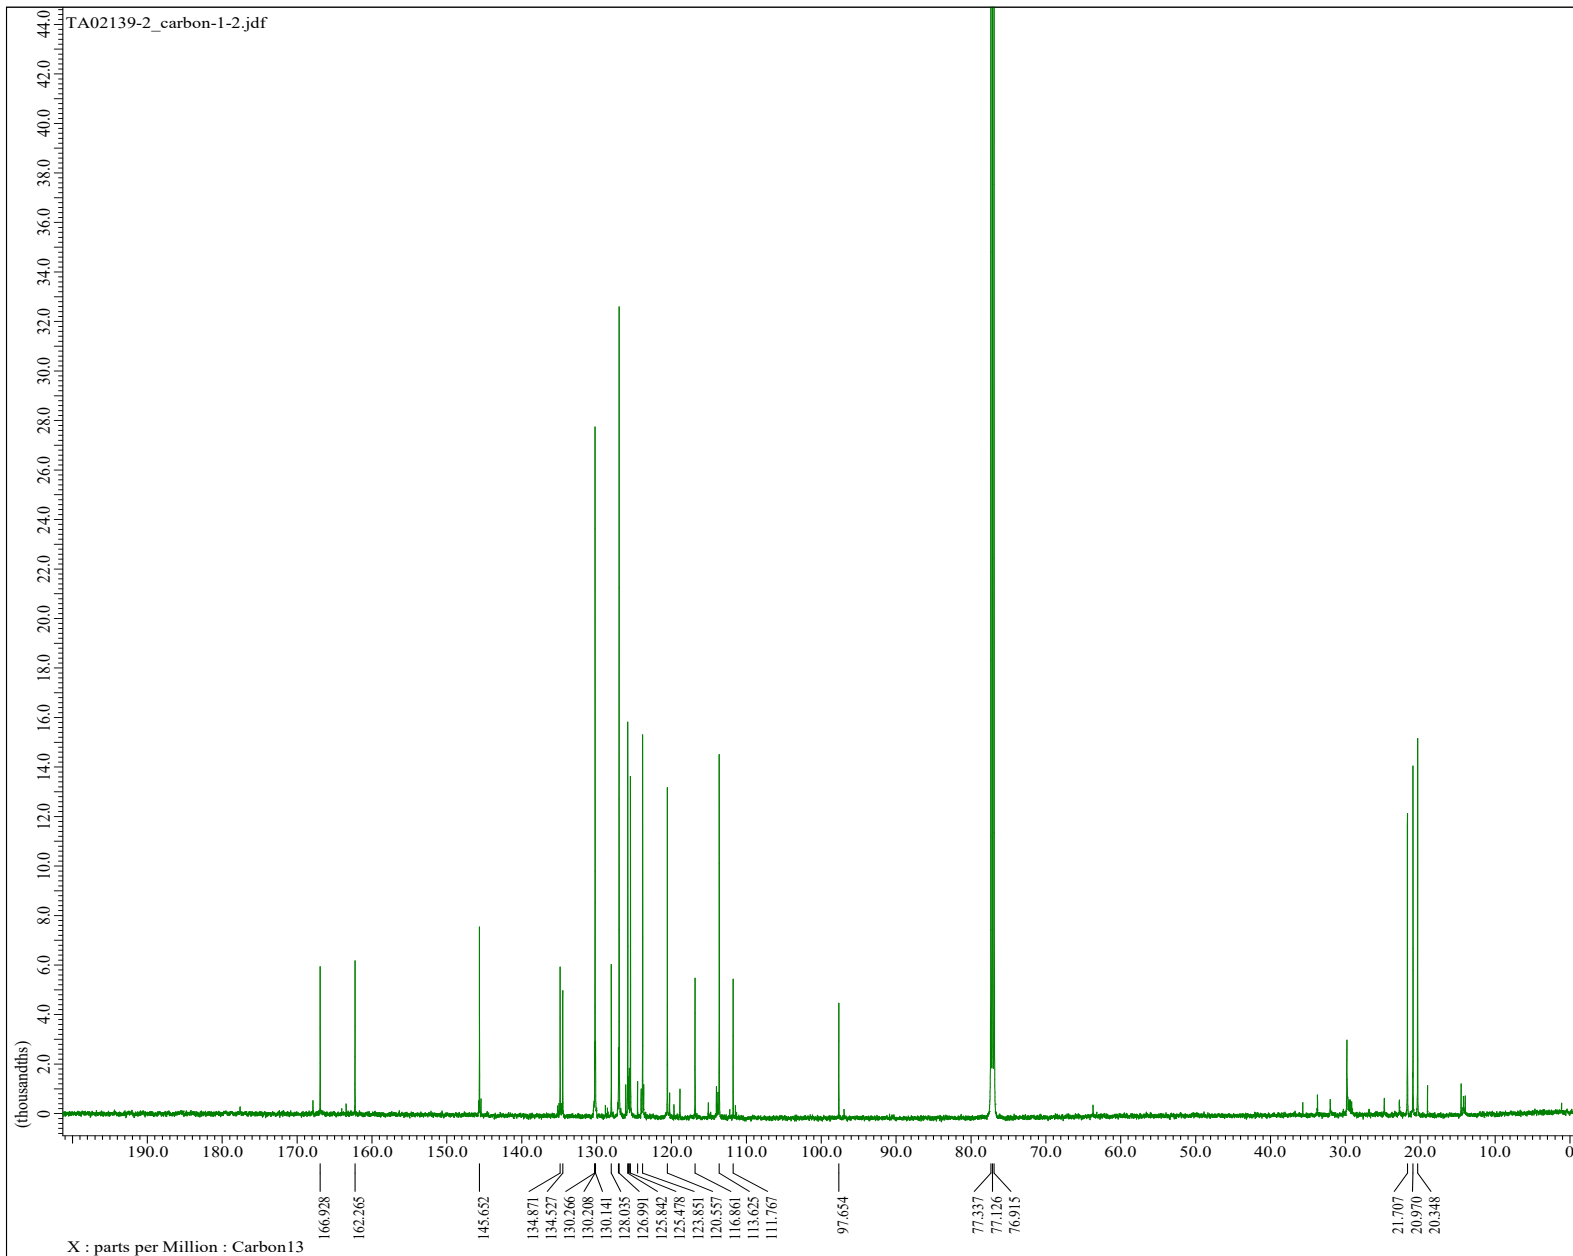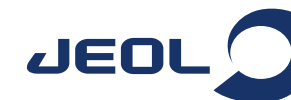

```

Filename      = TA02139-2_carbon-1
Author        = delta
Experiment    = carbon.jxp
Sample_Id     = TA02139-2
Solvent       = CHLOROFORM-D
Actual_Start_Time = 14-DEC-2020 20:35:
Revision_Time = 14-DEC-2020 21:17:

Comment       = single pulse decou
Data_Format   = 1D COMPLEX
Dim_Size      = 26214
X_Domain     = Carbon13
Dim_Title    = Carbon13
Dim_Units    = [ppm]
Dimensions    = X
Spectrometer  = JNM-ECZ600R/S3

Field_Strength = 14.09636928[T] (60
X_Acq_Duration = 0.69206016[s]
X_Domain      = Carbon13
X_Freq       = 150.91343039[MHz]
X_Offset     = 100[ppm]
X_Points     = 32768
X_Prescans   = 4
X_Resolution = 1.44496109[Hz]
X_Sweep     = 47.34848485[kHz]
X_Sweep_Clipped =
Irr_Domain   = Proton
Irr_Freq    = 600.1723046[MHz]
Irr_Offset  = 5[ppm]
Blanking    = 15[us]
Clipped     = FALSE
Scans       = 1300
Total_Scans = 1300

Relaxation_Delay = 1[s]
Recvr_Gain      = 56
Temp_Get       = 20.8[dc]
X_90_Width    = 8.8[us]
X_Acq_Time    = 0.69206016[s]
X_Angle       = 30[deg]
X_Attn        = 11[db]
X_Pulse       = 2.93333333[us]
Irr_Atn_Dec   = 26.162[db]
Irr_Atn_Dec_Calc = 26.162[db]
Irr_Atn_Dec_Default_Calc = 26.162[db]
Irr_Atn_Noise = 26.162[db]
Irr_Dec_Bandwidth_Hz = 7.23684211[kHz]
Irr_Dec_Bandwidth_Ppm = 12.05794078[ppm]
Irr_Dec_Freq  = 600.1723046[MHz]
Irr_Dec_Merit_Factor = 2.2
Irr_Decoupling = TRUE
Irr_Noise    = WALTZ
Irr_Offset_Default = 5[ppm]
Irr_Pwidth   = 76[us]
Irr_Pwidth_Default = 76[us]
Irr_Pwidth_Default_Calc = 76[us]
Irr_Pwidth_Templ = 76[us]
Irr_Wurst    = FALSE
Decimation_Rate = 0
Experiment_Path = c:\Program Files\J
Initial_Wait  = 1[s]
Noe_Time     = 1[s]
Noe_Time_Flag = FALSE
Relaxation_Delay_Calc = 0[s]
Relaxation_Delay_Temp = 1[s]
Repetition_Time = 1.69206016[s]

```

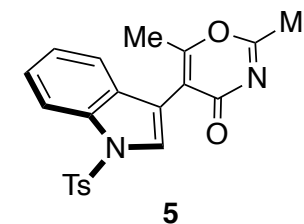

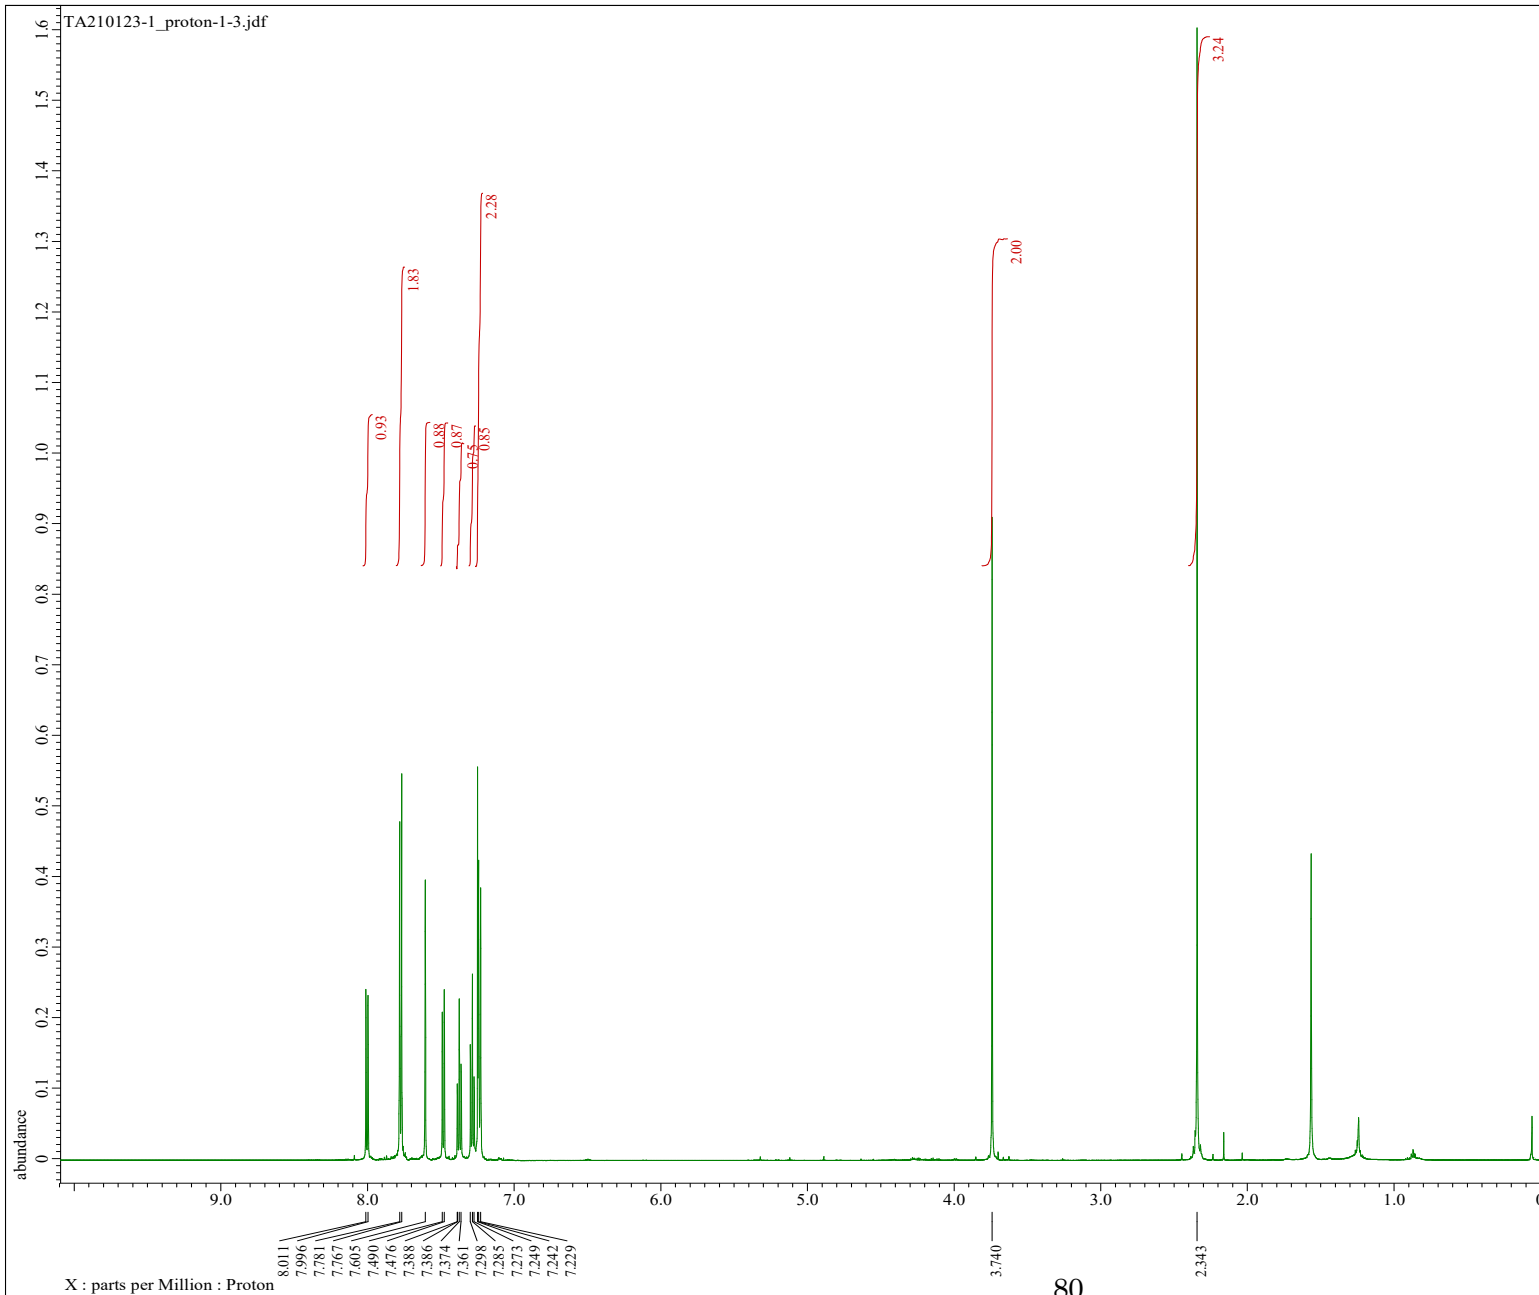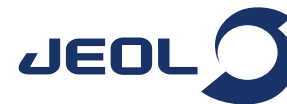

```

Filename      = TA210123-1_proton-1-3
Author       = delta
Experiment   = proton.jxp
Sample_Id    = TA210123-1
Solvent      = CHLOROFORM-D
Actual_Start_Time = 23-JAN-2021 17:05:49
Revision_Time  = 23-JAN-2021 17:17:14

Comment      = 3-CH2CN
Data_Format  = 1D COMPLEX
Dim_Size     = 13107
X_Domain     = Proton
Dim_Title    = Proton
Dim_Units    = [ppm]
Dimensions   = X
Spectrometer = JNM-ECZ600R/S3

Field_Strength = 14.09636928[T] (600[M
X_Acq_Duration = 1.4548992[s]
X_Domain       = Proton
X_Freq         = 600.1723046[MHz]
X_Offset       = 5 [ppm]
X_Points       = 16384
X_Prescans     = 1
X_Resolution   = 0.68733284 [Hz]
X_Sweep        = 11.26126126 [kHz]
X_Sweep_Clipped = 9.00900901 [kHz]
Irr_Domain     = Proton
Irr_Freq       = 600.1723046[MHz]
Irr_Offset     = 5 [ppm]
Tri_Domain     = Proton
Tri_Freq       = 600.1723046[MHz]
Tri_Offset     = 5 [ppm]
Blanking       = 5 [us]
Clipped        = FALSE
Scans          = 8
Total_Scans    = 8

Relaxation_Delay = 5[s]
Recvr_Gain       = 36
Temp_Set         = 20.7 [dC]
X_90_Width       = 9.5 [us]
X_Acq_Time       = 1.4548992[s]
X_Angle          = 45 [deg]
X_Atn            = 8.1 [dB]
X_Pulse          = 4.75 [us]
Irr_Mode         = Off
Tri_Mode         = Off
Dante_Loop       = 500
Dante_Preset     = FALSE
Decimation_Rate  = 0
Experiment_Path  = c:\Program Files\JEOL
Initial_Wait     = 1[s]
Phase            = (0, 90, 270, 180, 180)
Preset_Time      = 5[s]
Preset_Time_Flag = FALSE
Relaxation_Delay_Calc = 0[s]
Relaxation_Delay_Temp = 5[s]
Repetition_Time  = 6.4548992[s]
  
```

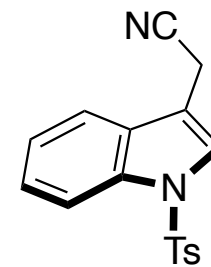

6

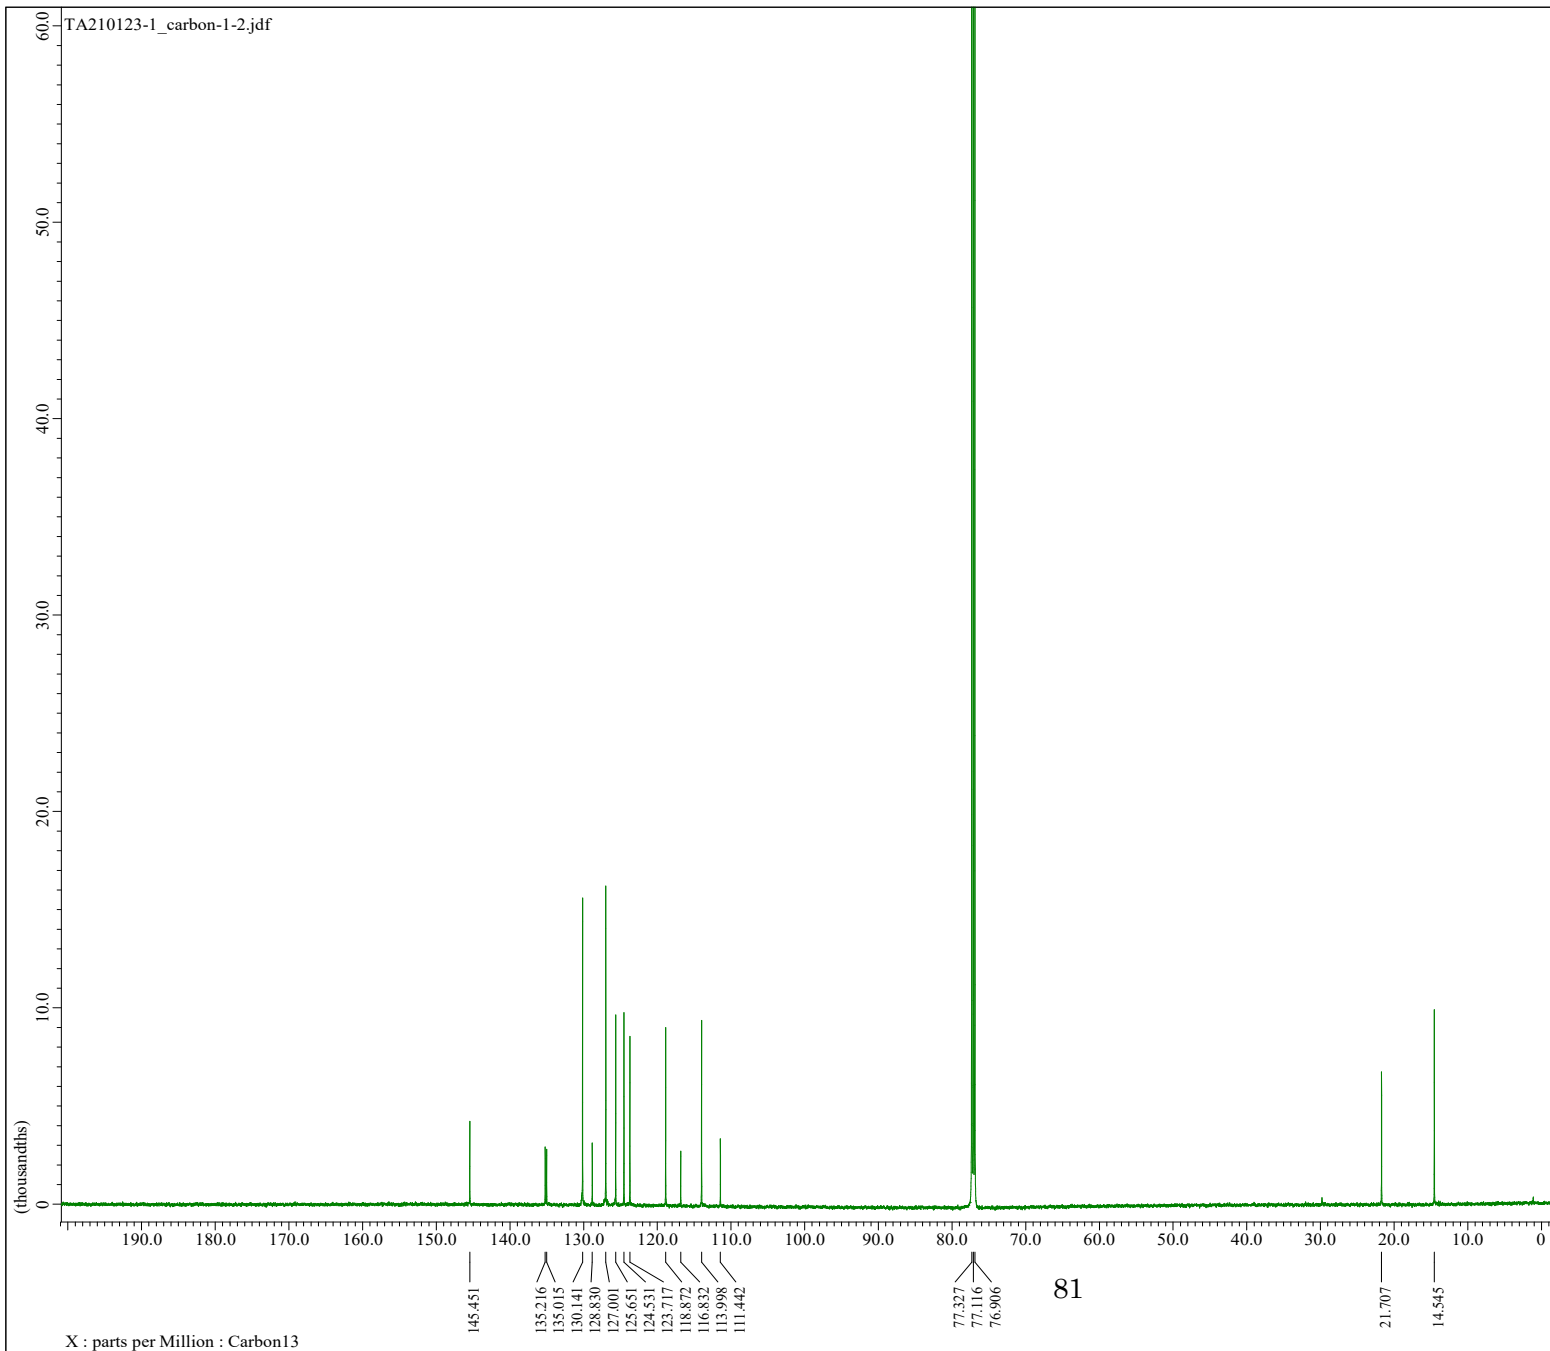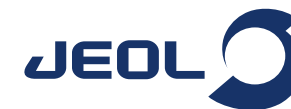

```

Filename      = TA210123-1_carbon-
Author        = delta
Experiment    = carbon.jxp
Sample_Id     = TA210123-1
Solvent       = CHLOROFORM-D
Actual_Start_Time = 23-JAN-2021 19:11:
Revision_Time = 23-JAN-2021 20:09:

Comment       = 3-CH2CN
Data_Format   = 1D_COMPLEX
Dim_Size      = 26214
X_Domain      = Carbon13
Dim_Title     = Carbon13
Dim_Units     = [ppm]
Dimensions    = X
Spectrometer  = JNM-EC2600R/S3

Field_Strength = 14.09636928[T] (60
X_Acq_Duration = 0.69206016[s]
X_Domain       = Carbon13
X_Freq         = 150.91343039[MHz]
X_Offset       = 100[ppm]
X_Points       = 32768
X_Prescans     = 4
X_Resolution   = 1.44496109[Hz]
X_Sweep        = 47.34848485[kHz]
X_Sweep_Clipped = 37.87878788[kHz]
Irr_Domain     = Proton
Irr_Freq       = 600.1723046[MHz]
Irr_Offset     = 5[ppm]
Blanking       = 15[us]
Clipped        = FALSE
Scans          = 1820
Total_Scans    = 1820

Relaxation_Delay = 1[s]
Recvr_Gain       = 56
Temp_Get         = 20.6[dC]
X_90_Width       = 8.8[us]
X_Acq_Time       = 0.69206016[s]
X_Angle          = 30[deg]
X_Atn            = 11[dB]
X_Pulse          = 2.93333333[us]
Irr_Atn_Dec      = 26.162[dB]
Irr_Atn_Dec_Calc = 26.162[dB]
Irr_Atn_Dec_Default_Calc = 26.162[dB]
Irr_Atn_Noise    = 26.162[dB]
Irr_Dec_Bandwidth_Hz = 7.23684211[kHz]
Irr_Dec_Bandwidth_Ppm = 12.05794078[ppm]
Irr_Dec_Freq     = 600.1723046[MHz]
Irr_Dec_Merit_Factor = 2.2
Irr_Decoupling  = TRUE
Irr_Noise        = TRUE
Irr_Noise        = WALTZ
Irr_Offset_Default = 5[ppm]
Irr_Pwidth       = 76[us]
Irr_Pwidth_Default = 76[us]
Irr_Pwidth_Default_Calc = 76[us]
Irr_Pwidth_Templ = 76[us]
Irr_Wurst        = FALSE
Decimation_Rate  = 0
Experiment_Path  = c:\Program Files\J
Initial_Wait     = 1[s]
Noe_Time         = 1[s]
Noe_Time_Flag    = FALSE
Relaxation_Delay_Calc = 0[s]
Relaxation_Delay_Temp = 1[s]
Repetition_Time  = 1.69206016[s]
  
```

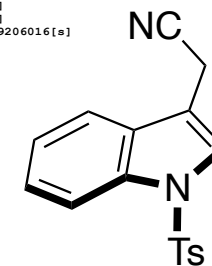

6

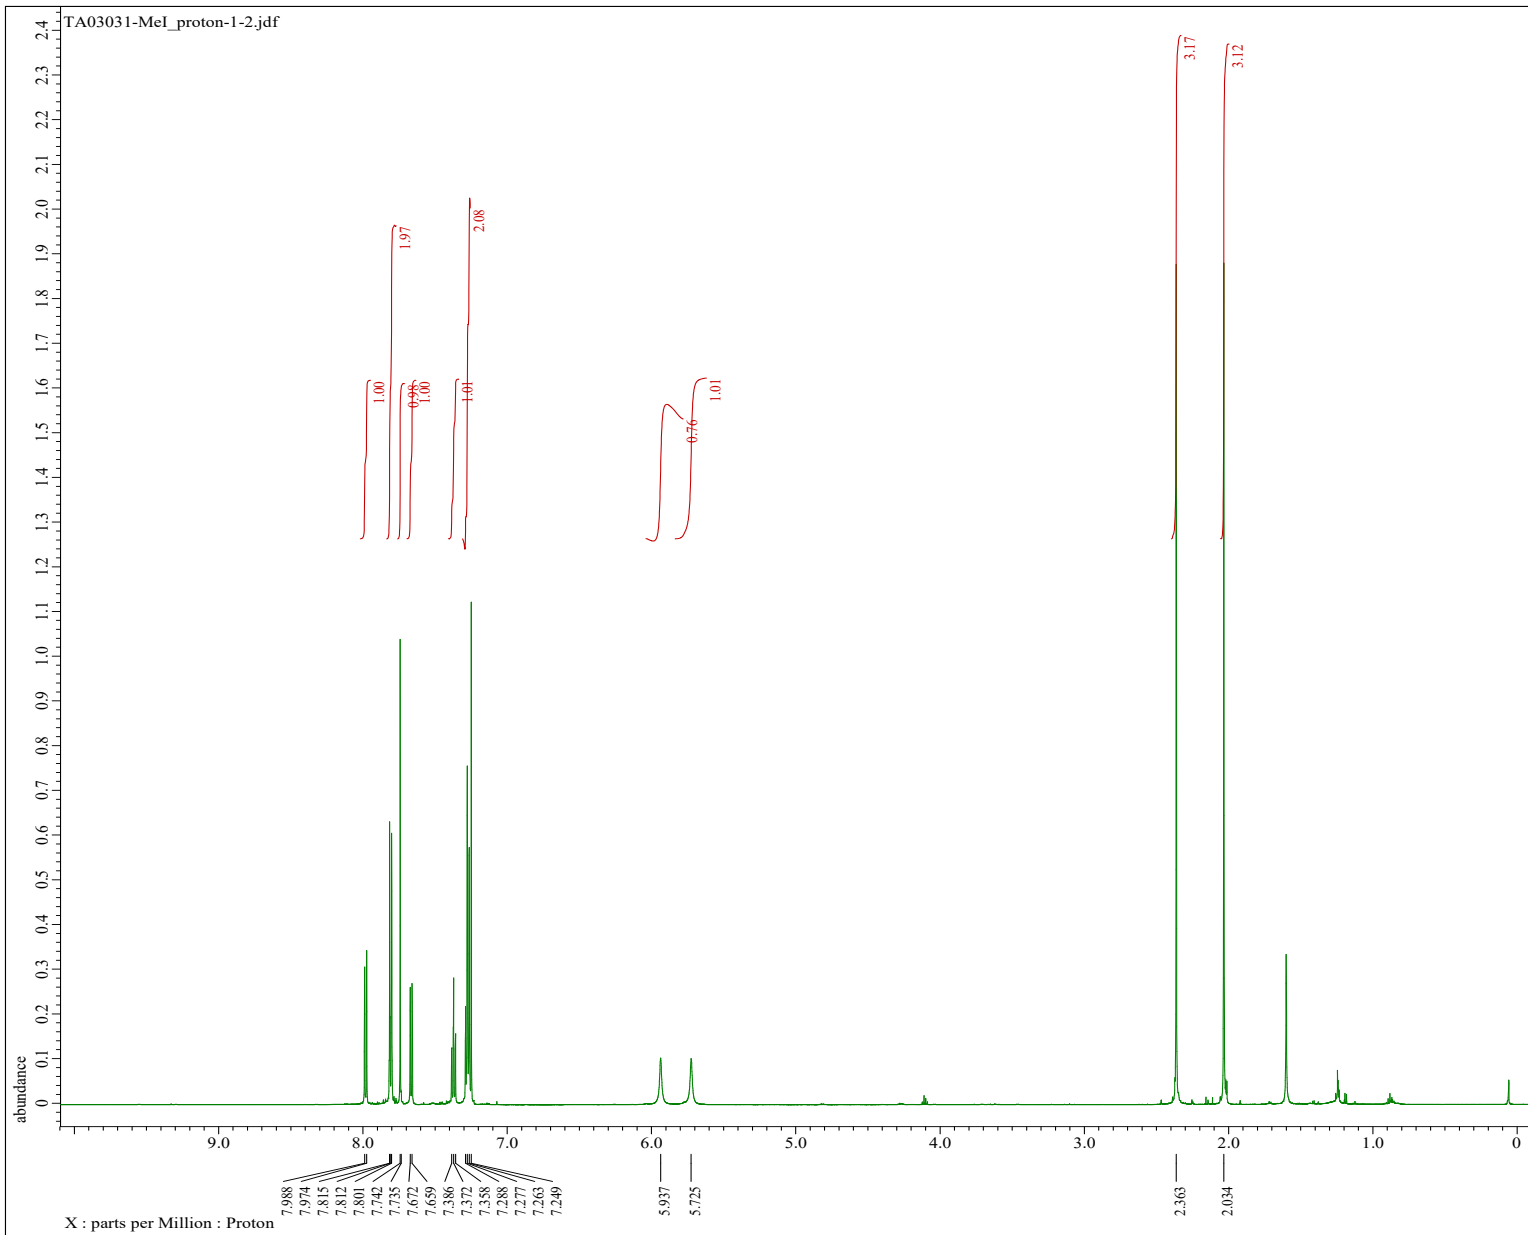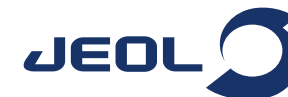

```

Filename      = TA03031-MeI_proton-1-
Author       = delta
Experiment   = proton_jmp
Sample_Id    = TA03031-MeI
Solvent      = CHLOROFORM-D
Actual_Start_Time = 22-JAN-2021 20:34:21
Revision_Time  = 22-JAN-2021 20:36:41

Comment      = MeI
Data_Format  = 1D COMPLEX
Dim_Size     = 13107
X_Domain     = Proton
Dim_Title    = Proton
Dim_Units    = [ppm]
Dimensions   = X
Spectrometer = JNM-ECZ600R/S3

Field_Strength = 14.09636928[T] (600[M]
X_Acq_Duration = 1.4548992[s]
X_Domain       = Proton
X_Freq         = 600.1723046[MHz]
X_Offset       = 5[ppm]
X_Points       = 16384
X_Prescans     = 1
X_Resolution   = 0.68733284[Hz]
X_Sweep        = 11.26126126[kHz]
X_Sweep_Clippped = 9.00900901[kHz]
Irr_Domain     = Proton
Irr_Freq       = 600.1723046[MHz]
Irr_Offset     = 5[ppm]
Tri_Domain     = Proton
Tri_Freq       = 600.1723046[MHz]
Tri_Offset     = 5[ppm]
Blanking       = 5[us]
Clipped        = FALSE
Scans          = 16
Total_Scans    = 16

Relaxation_Delay = 5[s]
Recvr_Gain       = 36
Temp_Get         = 21.2[dC]
X_90_Width       = 9.5[us]
X_Acq_Time       = 1.4548992[s]
X_Angle          = 45[deg]
X_Air            = 8.1[dB]
X_Pulse          = 4.75[us]
Irr_Mode         = Off
Tri_Mode         = Off
Dante_Loop      = 500
Dante_Preset    = FALSE
Decimation_Rate = 0
Experiment_Path = c:\Program Files\JEOL
Initial_Wait     = 1[s]
Phase            = {0, 90, 270, 180, 180}
Preset_Time      = 5[s]
Preset_Time_Flag = FALSE
Relaxation_Delay_Calc = 0[s]
Relaxation_Delay_Temp = 5[s]
Repetition_Time  = 6.4548992[s]
  
```

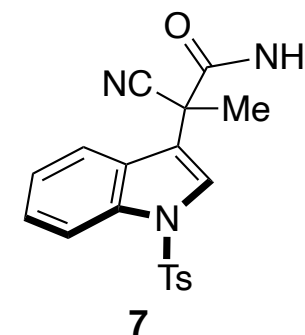

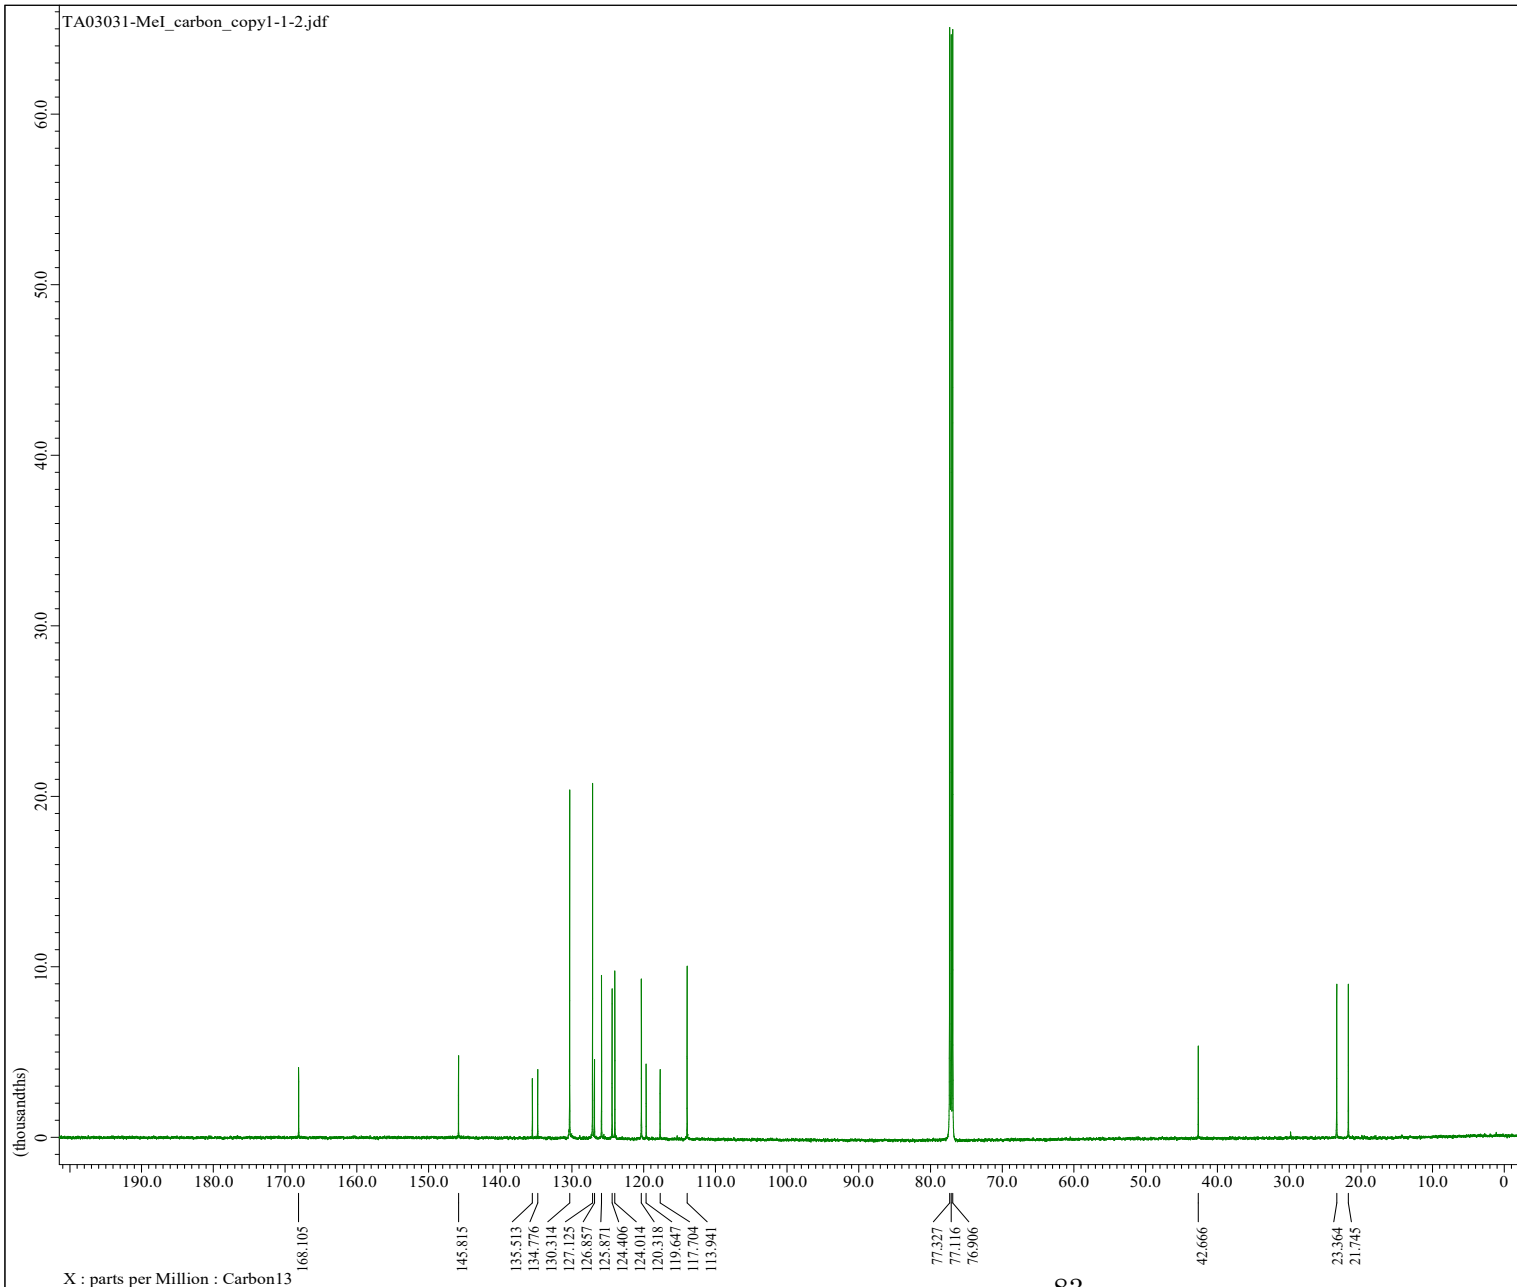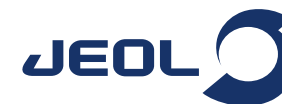

```

Filename      = TA03031-MeI_carbon
Author       = delta
Experiment   = carbon.jxp
Sample_Id    = TA03031-MeI
Solvent      = CHLOROFORM-D
Actual_Start_Time = 22-JAN-2021 20:38:
Revision_Time = 22-JAN-2021 21:50:

Comment      = MeI
Data_Format  = 1D COMPLEX
Dim_Size     = 26214
X_Domain     = Carbon13
Dim_Title    = Carbon13
Dim_Units    = [ppm]
Dimensions   = X
Spectrometer = JNM-ECZ600R/S3

Field_Strength = 14.09636928[T] (60
X_Acq_Duration = 0.69206016[s]
X_Domain       = Carbon13
X_Freq         = 150.91343039[MHz]
X_Offset       = 100[ppm]
X_Points       = 32768
X_Prescans     = 4
X_Resolution  = 1.44496109[Hz]
X_Sweep        = 47.34849485[kHz]
X_Sweep_Clipped = 37.87878788[kHz]
IRF_Domain     = Proton
IRF_Freq       = 600.1723046[MHz]
IRF_Offset     = 5[ppm]
Blanking       = 15[us]
Clipped        = TRUE
Incomplete_Copy = TRUE
Scans          = 2193
Total_Scans    = 2193

Relaxation_Delay = 1[s]
Recvr_Gain       = 56
Temp_Get         = 21[dc]
X_90_Width      = 8.8[us]
X_Acq_Time       = 0.69206016[s]
X_Angle          = 30[deg]
X_Atn            = 11[db]
X_Pulse         = 2.93333333[us]
IRF_Atn_Dec     = 26.162[db]
IRF_Atn_Dec_Calc = 26.162[db]
IRF_Atn_Dec_Default_Calc = 26.162[db]
IRF_Atn_Noise   = 26.162[db]
IRF_Dec_Bandwidth_Hz = 7.23684211[kHz]
IRF_Dec_Bandwidth_Ppm = 12.05794078[ppm]
IRF_Dec_Freq    = 600.1723046[MHz]
IRF_Dec_Merit_Factor = 2.2
IRF_Decoupling = TRUE
IRF_Noise       = TRUE
IRF_Noise       = WALTZ
IRF_Offset_Default = 5[ppm]
IRF_Pwidth      = 76[us]
IRF_Pwidth_Default = 76[us]
IRF_Pwidth_Default_Calc = 76[us]
IRF_Pwidth_Templ = 76[us]
IRF_Wurst       = FALSE
Decimation_Rate = 0
Experiment_Path = c:\Program Files\J
Initial_Wait    = 1[s]
Noe_Time        = 1[s]
Noe_Time_Flag   = FALSE
Relaxation_Delay_Calc = 0[s]
Relaxation_Delay_Temp = 1[s]
Repetition_Time = 1.69206016[s]

```

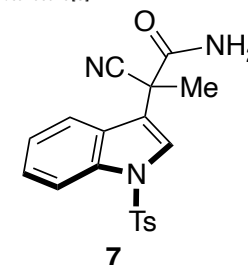

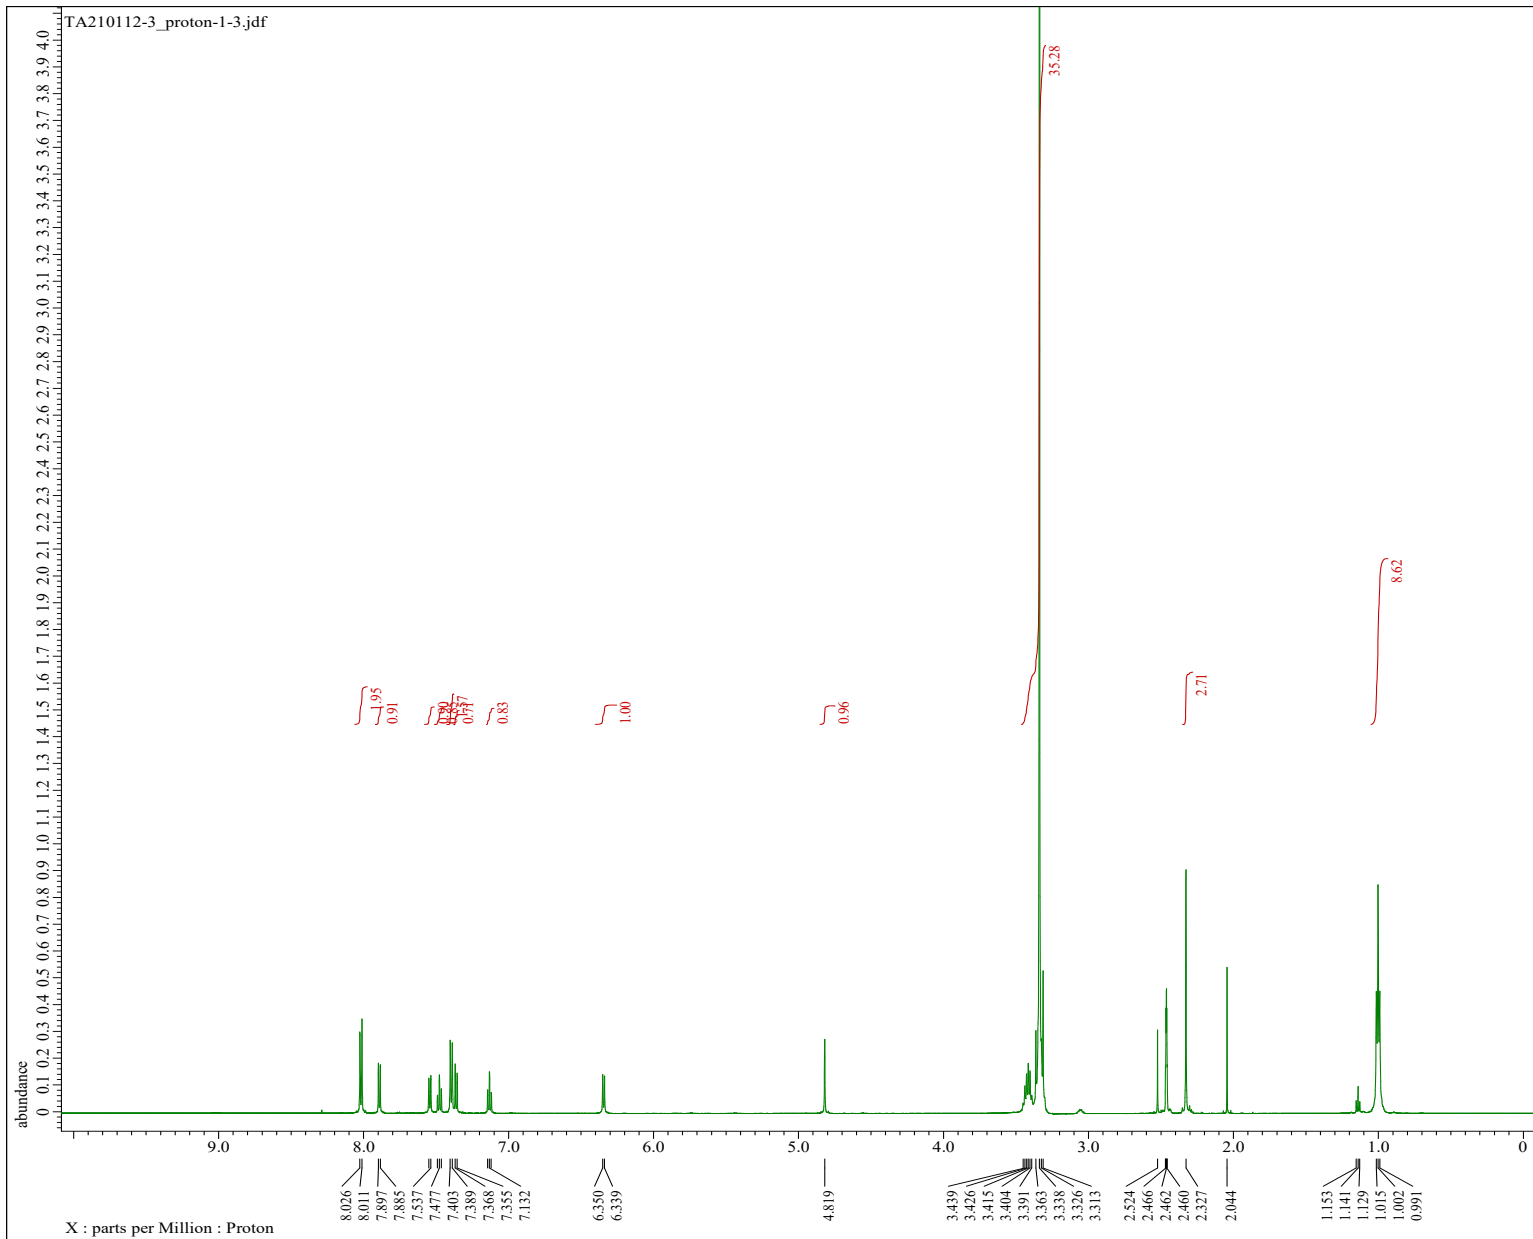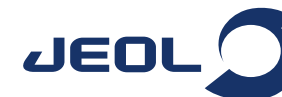

```

Filename      = TA210112-3_proton-1-3
Author        = delta
Experiment    = proton.jxp
Sample_Id    = TA210112-3
Solvent       = DMSO-D6
Actual_Start_Time = 12-JAN-2021 20:53:04
Revision_Time = 13-JAN-2021 09:10:40

Comment       = 18O-HITAB-DMSO
Data_Format   = 1D COMPLEX
Dim_Size      = 13107
X_Domain      = Proton
Dim_Title     = Proton
Dim_Units     = [ppm]
Dimensions    = X
Spectrometer  = JNM-ECZ600R/S3

Field_Strength = 14.09636928[T] (600[M]
X_Acq_Duration = 1.4548992[s]
X_Domain       = Proton
X_Freq         = 600.1723046[MHz]
X_Offset       = 5[ppm]
X_Points       = 16384
X_Prescans    = 1
X_Resolution  = 0.68733284[Hz]
X_Sweep       = 11.26126126[kHz]
X_Sweep_Clipped = 9.00900901[kHz]
Irr_Domain    = Proton
Irr_Freq      = 600.1723046[MHz]
Irr_Offset    = 5[ppm]
Tri_Domain    = Proton
Tri_Freq      = 600.1723046[MHz]
Tri_Offset    = 5[ppm]
Blanking      = 5[us]
Clipped       = FALSE
Scans         = 16
Total_Scans   = 16

Relaxation_Delay = 5[s]
Recvr_Gain       = 36
Temp_Get         = 18.5[dc]
X_90_Width       = 9.5[us]
X_Acq_Time       = 1.4548992[s]
X_Angle          = 45[deg]
X_Attn           = 8.1[db]
X_Pulse          = 4.7[us]
Irr_Mode         = Off
Tri_Mode         = Off
Dante_Loop       = 500
Dante_Preset     = FALSE
Decimation_Rate = 0
Experiment_Path  = c:\Program Files\JEOL
Initial_Wait     = 1[s]
Phase            = (0, 90, 270, 180, 180)
Preset_Time      = 5[s]
Preset_Time_Flag = FALSE
Relaxation_Delay_Calc = 0[s]
Relaxation_Delay_Temp = 5[s]
Repetition_Time = 6.4548992[s]
  
```

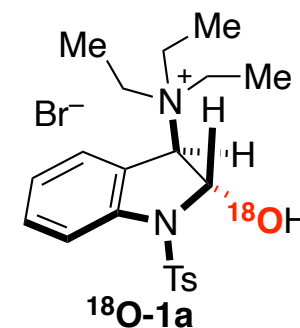



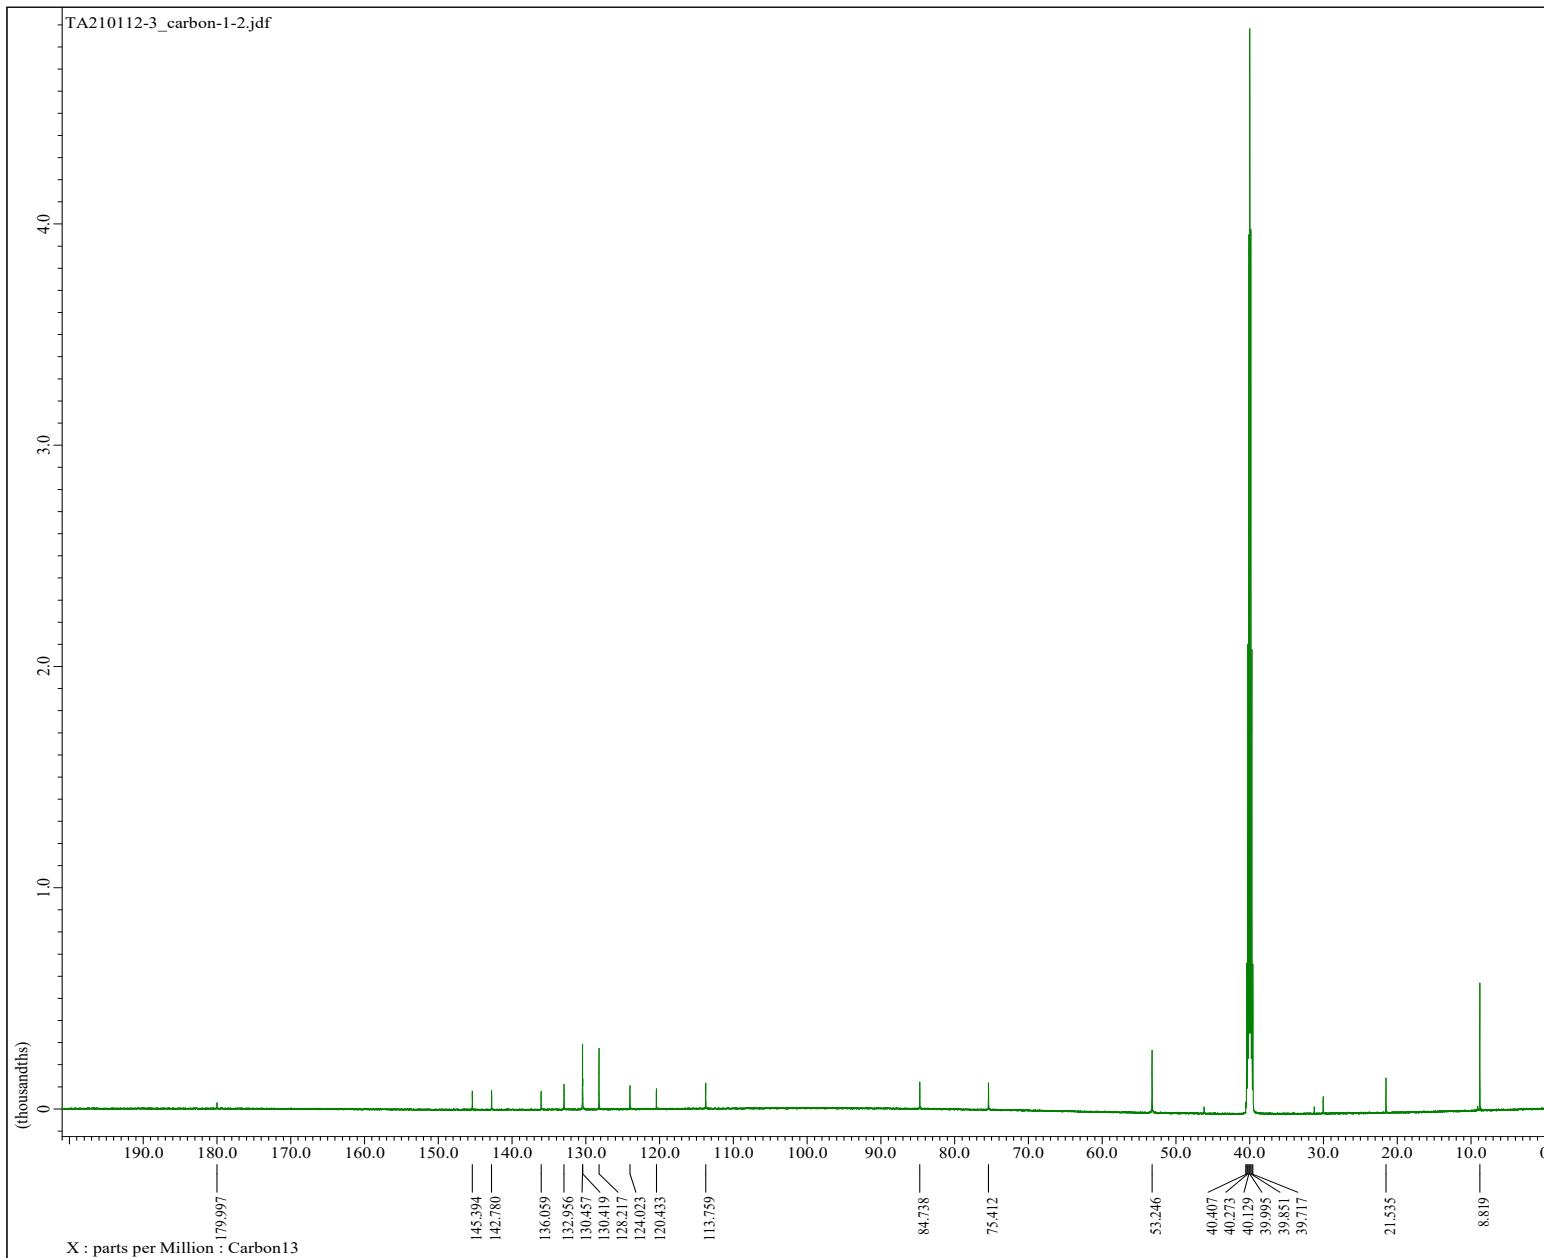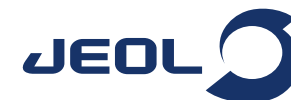

```

Filename      = TA210112-3_carbon-
Author        = delta
Experiment    = carbon.jxp
Sample_Id     = TA210112-3
Solvent       = DMSO-D6
Actual_Start_Time = 12-JAN-2021 20:57:
Revision_Time = 13-JAN-2021 09:17:

Comment       = single pulse decou
Data_Format   = 1D COMPLEX
Dim_Size      = 26214
X_Domain      = Carbon13
Dim_Title     = Carbon13
Dim_Units     = [ppm]
Dimensions    = X
Spectrometer  = JNM-EC2600R/S3

Field_Strength = 14.09636928[T] (60
X_Acq_Duration = 0.69206016[s]
X_Domain       = Carbon13
X_Freq         = 150.91343039[MHz]
X_Offset       = 100[ppm]
X_Points       = 32768
X_Prescans     = 4
X_Resolution   = 1.44496109[Hz]
X_Sweep        = 47.34848485[kHz]
X_Sweep_Clipped = 37.87878788[kHz]
IRF_Domain     = Proton
IRF_Freq       = 600.1723046[MHz]
IRF_Offset     = 5[ppm]
Blanking       = 15[us]
Clipped        = TRUE
Scans          = 4000
Total_Scans    = 4000

Relaxation_Delay = 1[s]
Recvr_Gain       = 26
Temp_Get         = 19[dc]
X_90_Width      = 8.8[us]
X_Acq_Time      = 0.69206016[s]
X_Angle         = 30[deg]
X_Atn           = 11[db]
X_Pulse         = 2.93333333[us]
IRF_Atn_Dec     = 26.162[db]
IRF_Atn_Dec_Calc = 26.162[db]
IRF_Atn_Dec_Default_Calc = 26.162[db]
IRF_Atn_Noise  = 26.162[db]
IRF_Dec_Bandwidth_Hz = 7.23684211[kHz]
IRF_Dec_Bandwidth_Ppm = 12.05794078[ppm]
IRF_Dec_Freq    = 600.1723046[MHz]
IRF_Dec_Merit_Factor = 2.2
IRF_Decoupling = TRUE
IRF_Noise       = WALTZ
IRF_Offset_Default = 5[ppm]
IRF_Pwidth      = 76[us]
IRF_Pwidth_Default = 76[us]
IRF_Pwidth_Default_Calc = 76[us]
IRF_Pwidth_Templ = 76[us]
IRF_Wurst       = FALSE
Declination_Rate = 0
Experiment_Path  = c:\Program Files\J
Initial_Wait    = 1[s]
Noe_Time        = 1[s]
Noe_Time_Flag   = FALSE
Relaxation_Delay_Calc = 0[s]
Relaxation_Delay_Temp = 1[s]
Repetition_Time = 1.69206016[s]
  
```

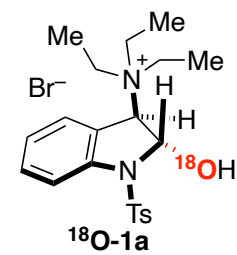

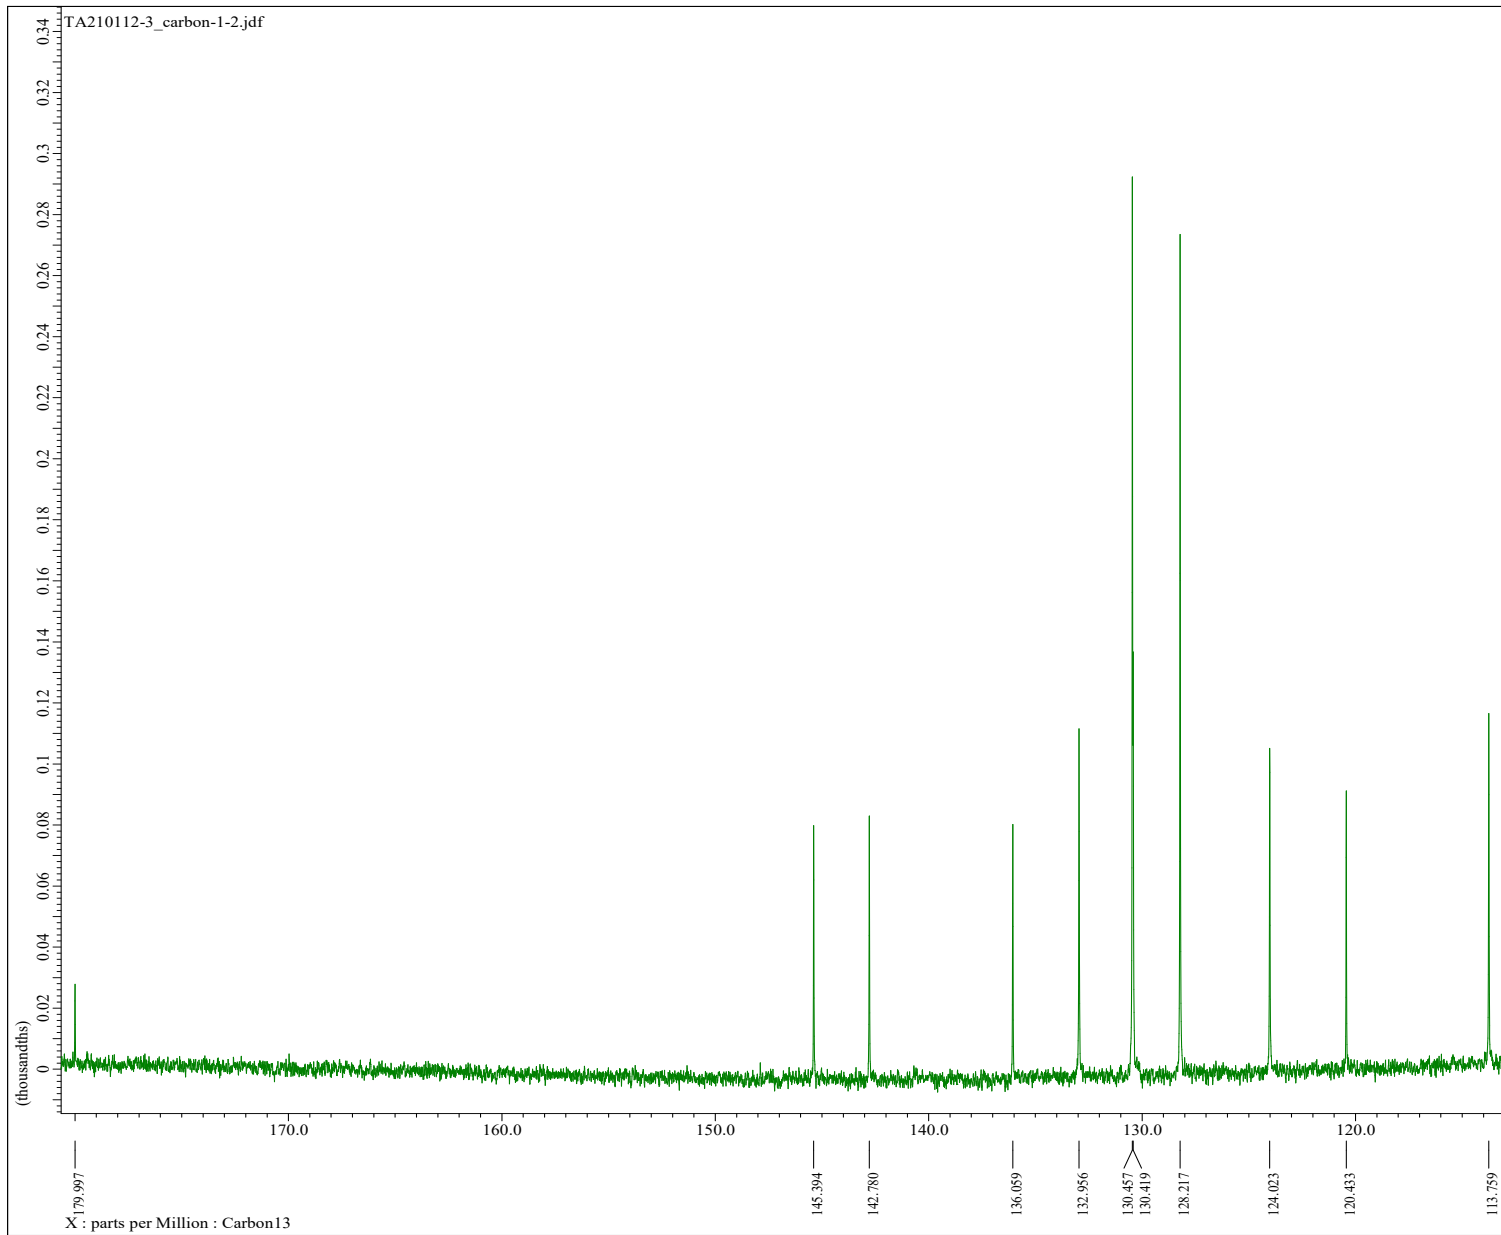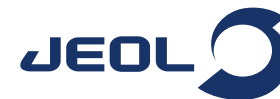

```

Filename      = TA210112-3_carbon-
Author        = delta
Experiment    = carbon_jmp
Sample_Id     = TA210112-3
Solvent       = DMSO-D6
Actual_Start_Time = 12-JAN-2021 20:57:
Revision_Time = 13-JAN-2021 09:17:

Comment       = single pulse decou
Data_Format   = 1D COMPLEX
Dim_Size      = 26214
X_Domain      = Carbon13
Dim_Title     = Carbon13
Dim_Units     = [ppm]
Dimensions    = X
Spectrometer  = JNM-ECP600R/S3

Field_Strength = 14.09636928 [T] (60
X_Acq_Duration = 0.69206016 [s]
X_Domain       = Carbon13
X_Freq         = 150.91343039 [MHz]
X_Offset       = 100 [ppm]
X_Points       = 32768
X_Prescans     = 4
X_Resolution   = 1.44496109 [Hz]
X_Sweep        = 47.34848485 [kHz]
X_Sweep_Clipped = 37.87878788 [kHz]
Irr_Domain     = Proton
Irr_Freq       = 600.1723046 [MHz]
Irr_Offset     = 5 [ppm]
Blanking       = 15 [us]
Clipped        = TRUE
Scans          = 4000
Total_Scans    = 4000

Relaxation_Delay = 1 [s]
Recvr_Gain       = 26
Temp_Get         = 19 [dC]
X_90_Width       = 8.8 [us]
X_Acq_Time       = 0.69206016 [s]
X_Angle          = 30 [deg]
X_Atn            = 11 [dB]
X_Pulse          = 2.93333333 [us]
Irr_Atn_Dec      = 26.162 [dB]
Irr_Atn_Dec_Calc = 26.162 [dB]
Irr_Atn_Dec_Default_Calc = 26.162 [dB]
Irr_Atn_Noise   = 26.162 [dB]
Irr_Dec_Bandwidth_Hz = 7.23684211 [kHz]
Irr_Dec_Bandwidth_Fpm = 12.05794078 [ppm]
Irr_Dec_Freq     = 600.1723046 [MHz]
Irr_Dec_Merit_Factor = 2.2
Irr_Decoupling  = TRUE
Irr_Noise       = WALTZ
Irr_Offset_Default = 5 [ppm]
Irr_Pwidth      = 76 [us]
Irr_Pwidth_Default = 76 [us]
Irr_Pwidth_Default_Calc = 76 [us]
Irr_Pwidth_Templ = 76 [us]
Irr_Wurst       = FALSE
Decimation_Rate = 0
Experiment_Path = c:\Program Files\J
Initial_Wait    = 1 [s]
Noe_Time        = 1 [s]
Noe_Time_Flag   = FALSE
Relaxation_Delay_Calc = 0 [s]
Relaxation_Delay_Temp = 1 [s]
Repetition_Time = 1.69206016 [s]
  
```

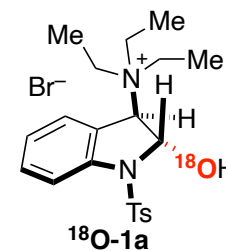

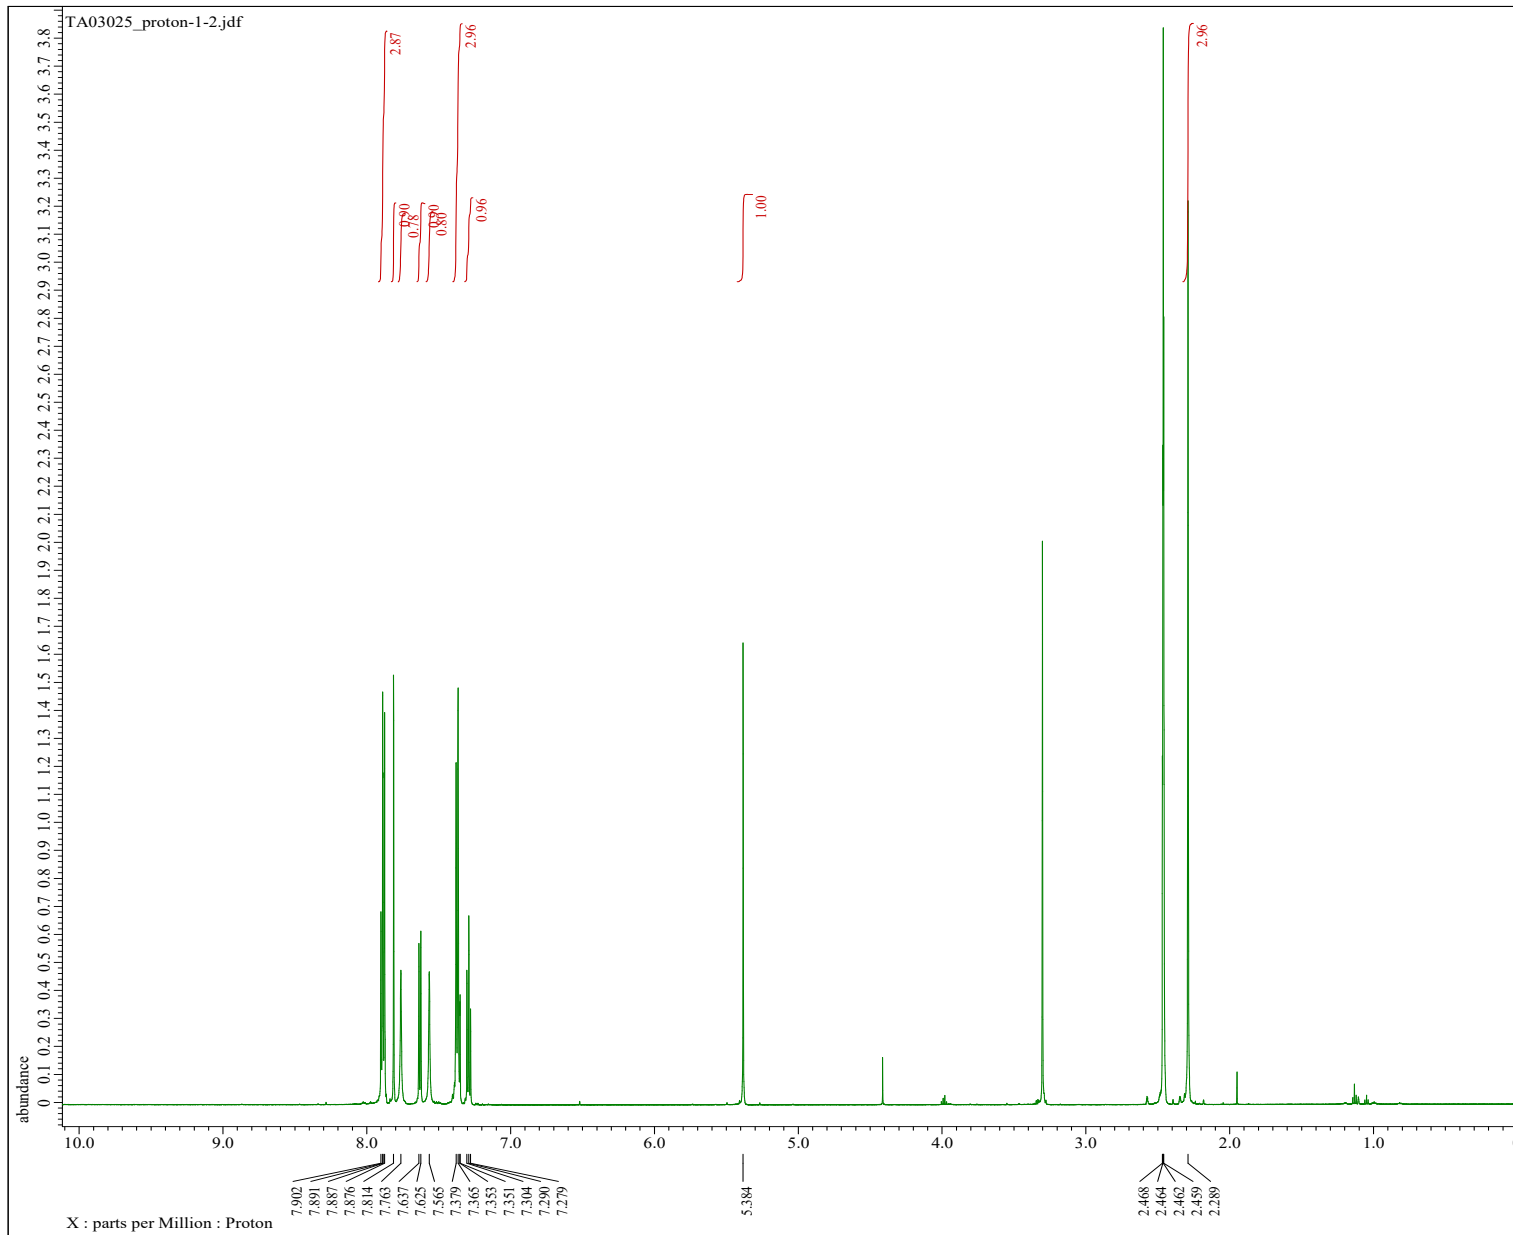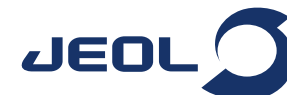

```

Filename      = TA03025_proton-1-2.jd
Author       = delta
Experiment   = proton_1xp
Sample_1d    = TA03025
Solvent      = DMSO-D6
Actual_Start_Time = 14-JAN-2021 13:28:09
Revision_Time  = 14-JAN-2021 13:27:30

Comment      = 18O-indolyacetamide
Data_Format   = 1D COMPLEX
Dim_Size     = 13107
X_Domain     = Proton
Dim_Title    = Proton
Dim_Units    = [ppm]
Dimensions   = X
Spectrometer = JNM-ECZ600R/S3

Field_Strength = 14.09636928[T] (600[M]
X_Acq_Duration = 1.4548992[s]
X_Domain       = Proton
X_Freq         = 600.1723046[MHz]
X_Offset       = 5[ppm]
X_Points       = 16384
X_Prescans     = 1
X_Resolution   = 0.68733284[Hz]
X_Sweep        = 11.26126126[kHz]
X_Sweep_Clipped = 9.00900901[kHz]
Irr_Domain     = Proton
Irr_Freq       = 600.1723046[MHz]
Irr_Offset     = 5[ppm]
Tri_Domain     = Proton
Tri_Freq       = 600.1723046[MHz]
Tri_Offset     = 5[ppm]
Blanking       = 5[us]
Clipped        = TRUE
Scans          = 8
Total_Scans    = 8

Relaxation_Delay = 5[s]
Recvr_Gain       = 56
Temp_Get         = 19.4[ $^{\circ}$ C]
X_90_Width      = 9.5[us]
X_Acq_Time      = 1.4548992[s]
X_Angle         = 45[deg]
X_P1n           = 8.1[us]
X_Pulse         = 4.75[us]
Irr_Mode        = Off
Tri_Mode        = Off
Dante_Loop      = 500
Dante_Presat    = FALSE
Decimation_Rate = 0
Experiment_Path = c:\Program Files\JEOL
Initial_Wait    = 1[s]
Phase           = {0, 90, 270, 180, 180}
Presat_Time     = 5[s]
Presat_Time_Flag = FALSE
Relaxation_Delay_Calc = 0[s]
Relaxation_Delay_Temp = 5[s]
Repetition_Time = 6.4548992[s]

```

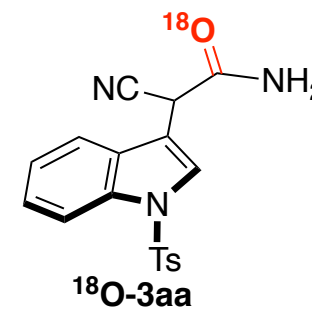

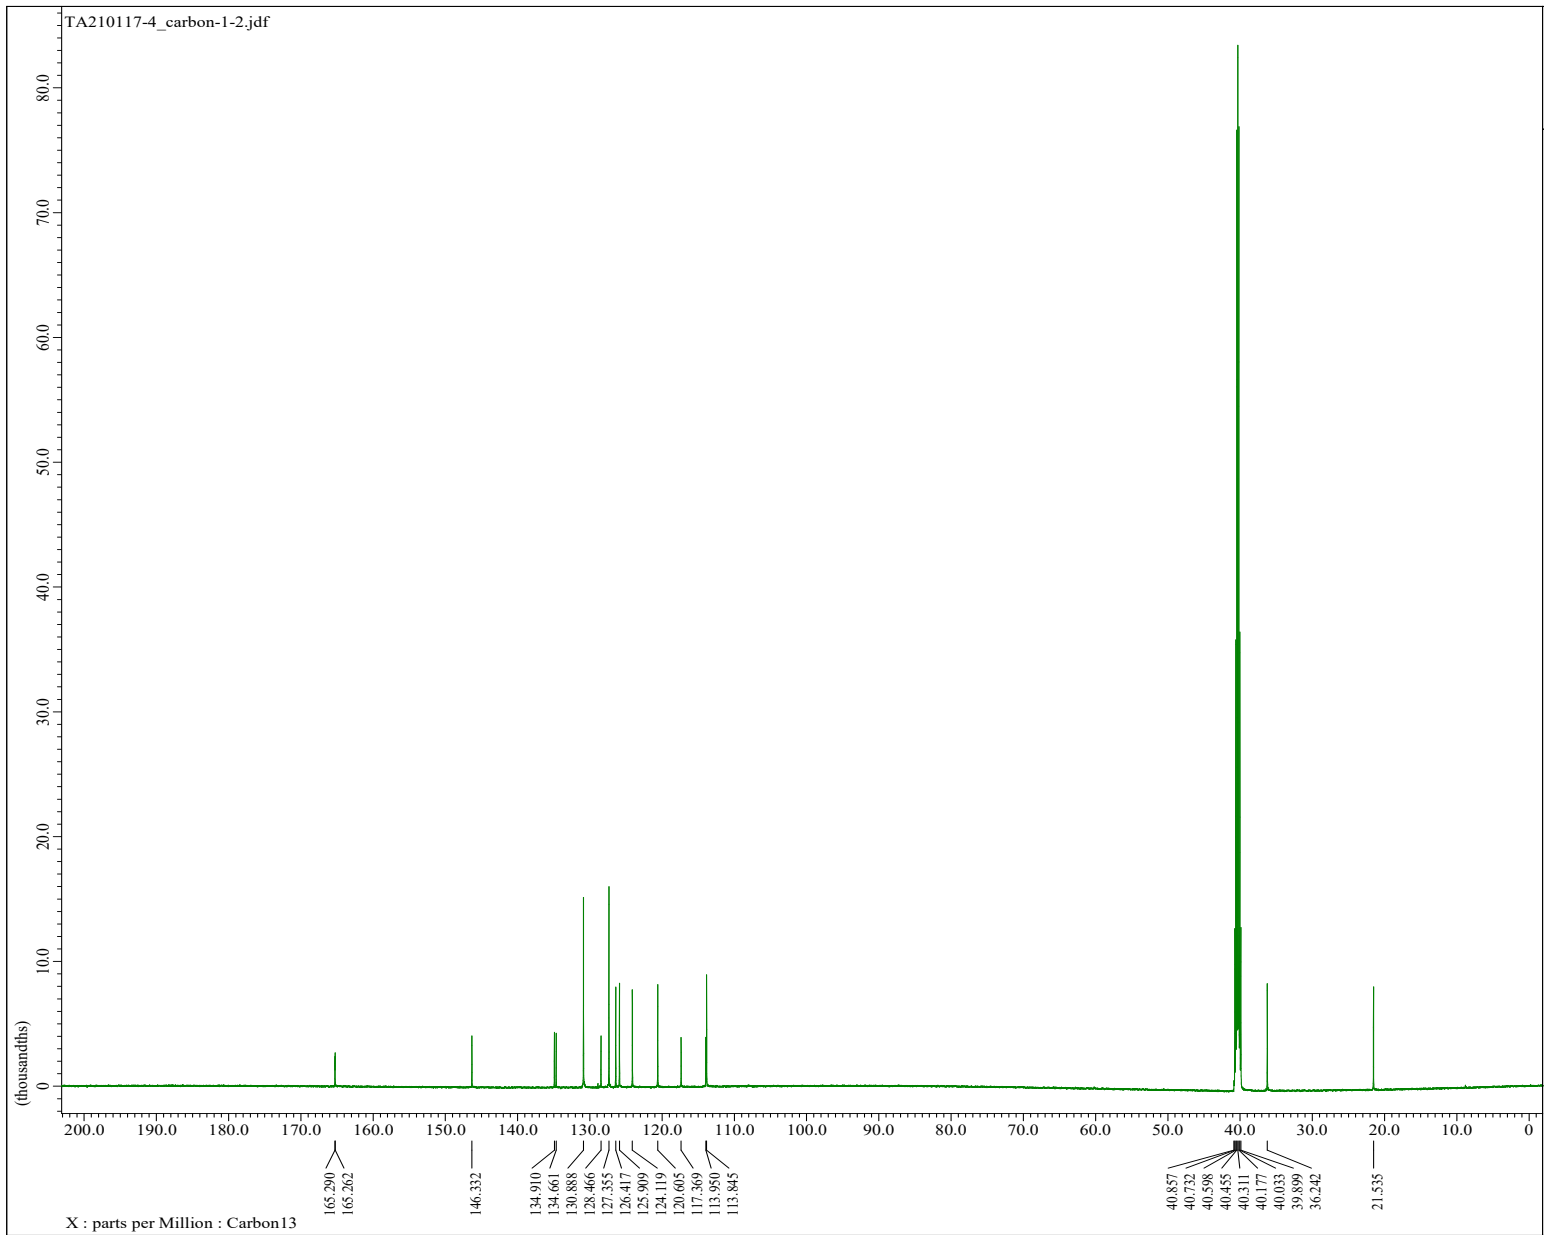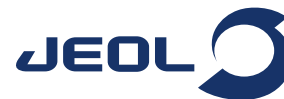

```

Filename      = TA210117-4_carbon-
Author       = delta
Experiment    = carbon.jxp
Sample_Id    = TA210117-4
Solvent      = DMSO-D6
Actual_Start_Time = 18-JAN-2021 05:31:
Revision_Time = 18-JAN-2021 08:19:

Comment      = 4F-keto-enol-DMSO
Data_Format  = 1D_COMPLEX
Dim_Size     = 26214
X_Domain     = Carbon13
Dim_Title    = Carbon13
Dim_Units    = [ppm]
Dimensions   = X
Spectrometer = JNM-ECZ600R/S3

Field_Strength = 14.09636928 [T] (60
X_Acq_Duration = 0.69206016 [s]
X_Domain       = Carbon13
X_Freq         = 150.91343039 [MHz]
X_Offset       = 100 [ppm]
X_Points       = 32768
X_Frescans     = 4
X_Resolution   = 1.44496109 [Hz]
X_Sweep        = 47.34848485 [kHz]
X_Sweep_Clipped = 37.87878788 [kHz]
Irr_Domain     = Proton
Irr_Freq       = 600.1723046 [MHz]
Irr_Offset     = 5 [ppm]
Blanking       = 15 [us]
Clipped        = TRUE
Scans          = 5000
Total_Scans    = 5000

Relaxation_Delay = 1 [s]
Recvr_Gain       = 56
Temp_Get         = 60 [dC]
X_90_Width      = 8.8 [us]
X_Acq_Time      = 0.69206016 [s]
X_Angle         = 30 [deg]
X_Atn           = 11 [dB]
X_Pulse         = 2.93333333 [us]
Irr_Atn_Dec     = 26.162 [dB]
Irr_Atn_Dec_Calc = 26.162 [dB]
Irr_Atn_Dec_Default_Calc = 26.162 [dB]
Irr_Atn_No     = 26.162 [dB]
Irr_Dec_Bandwidth_Hz = 7.23684211 [kHz]
Irr_Dec_Bandwidth_Ppm = 12.05794078 [ppm]
Irr_Dec_Freq    = 600.1723046 [MHz]
Irr_Dec_Merit_Factor = 2.2
Irr_Decoupling = TRUE
Irr_Noise       = WALTZ
Irr_Offset_Default = 5 [ppm]
Irr_Pwidth      = 76 [us]
Irr_Pwidth_Default = 76 [us]
Irr_Pwidth_Default_Calc = 76 [us]
Irr_Pwidth_Templ = 76 [us]
Irr_Wurst       = FALSE
Decimation_Rate = 0
Experiment_Path = c:\Program Files\J
Initial_Wait     = 1 [s]
Noe_Time         = 1 [s]
Noe_Time_Flag   = FALSE
Relaxation_Delay_Calc = 0 [s]
Relaxation_Delay_Temp = 1 [s]
Repetition_Time = 1.69206016 [s]
  
```

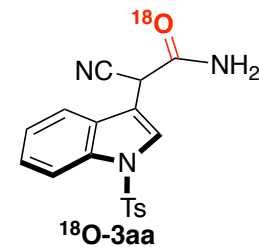

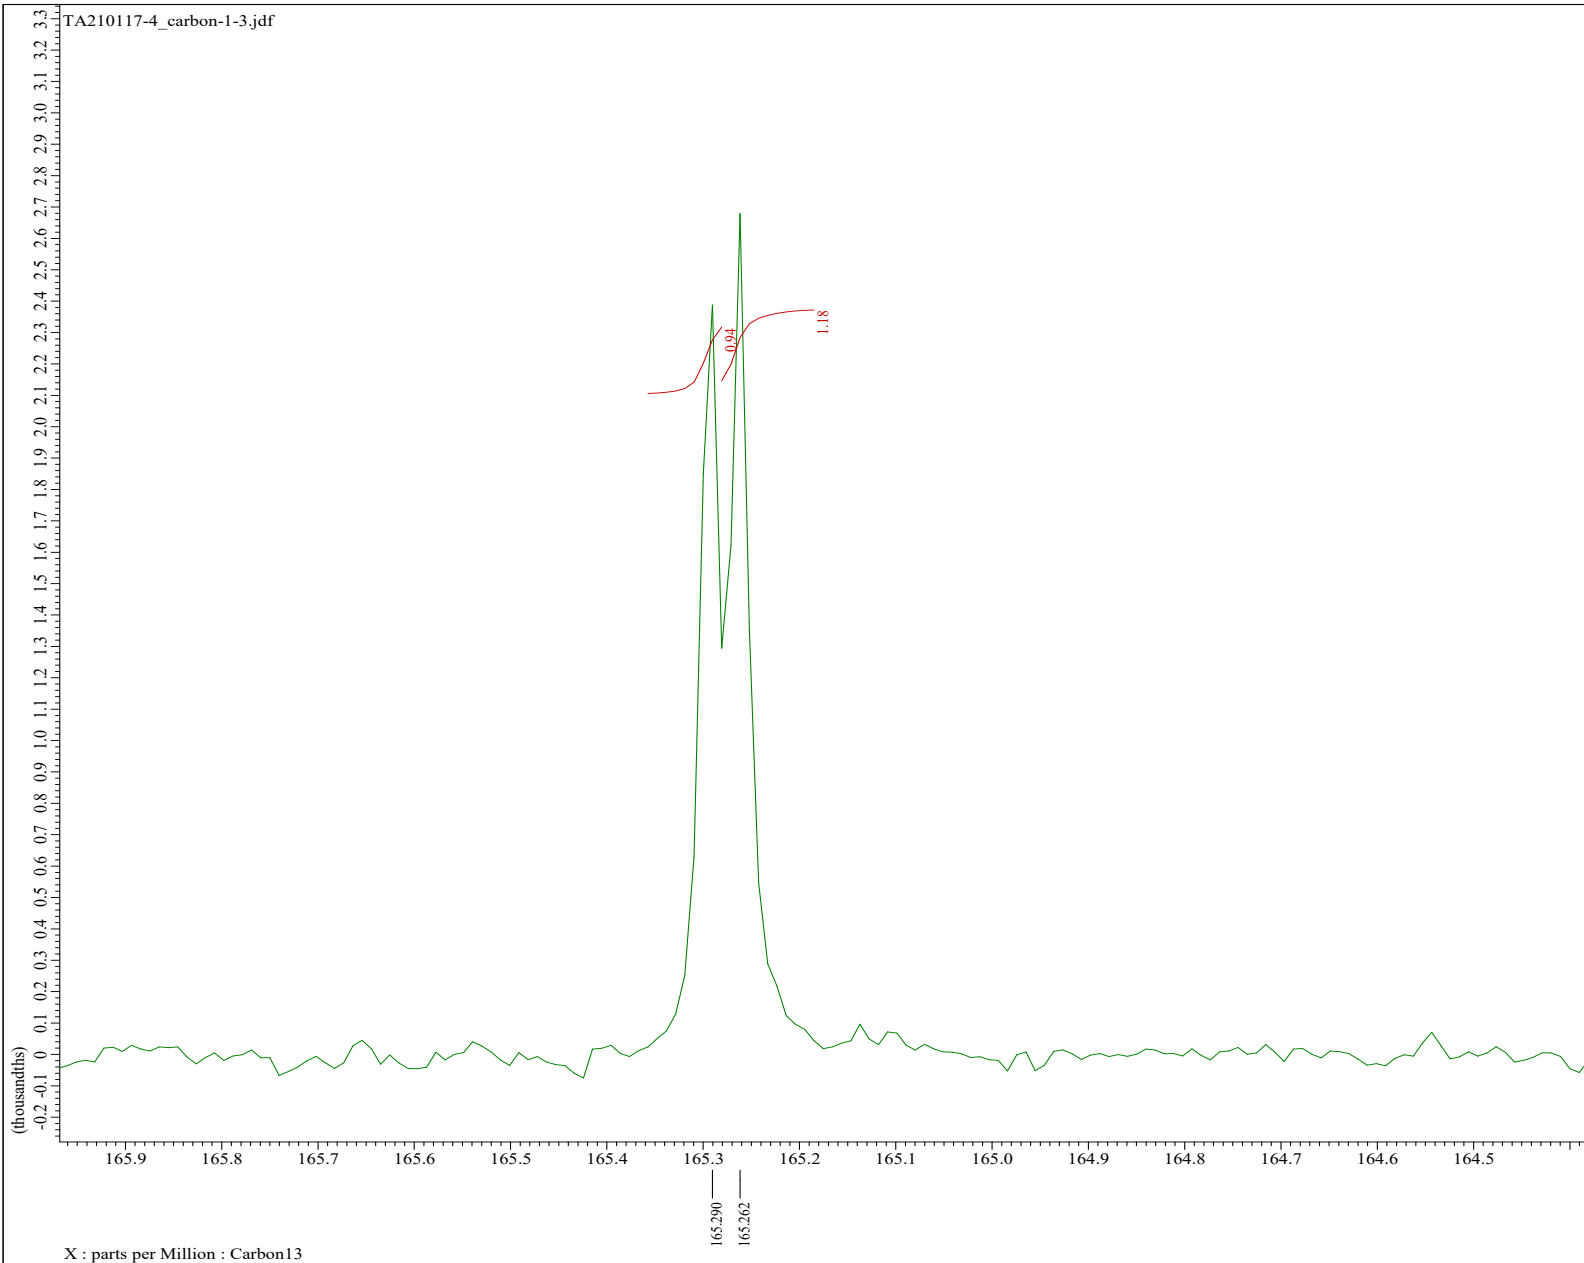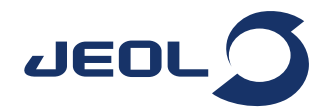

```

Filename      = TA210117-4_carbon-
Author        = delta
Experiment    = carbon.jxp
Sample_Id     = TA210117-4
Solvent       = DMSO-D6
Actual_Start_Time = 18-JAN-2021 05:31:
Revision_Time = 19-JAN-2021 20:44:

Comment       = 4F-keto-enol-DMSO
Data_Format   = 1D_COMPLEX
Dim_Size      = 26214
X_Domain      = Carbon13
Dim_Title     = carbon13
Dim_Units     = [ppm]
Dimensions    = X
Spectrometer  = JNM-ECZ600R/S3

Field_Strength = 14.09636928[T] (60
X_Acq_Duration = 0.69206016[s]
X_Domain       = Carbon13
X_Freq         = 150.91343039[MHz]
X_Offset       = 100[ppm]
X_Points       = 32768
X_Prescans     = 4
X_Resolution   = 1.44496109[Hz]
X_Sweep        = 47.34848485[kHz]
X_Sweep_Clipped = 37.87878788[kHz]
Irr_Domain     = Proton
Irr_Freq       = 600.1723046[MHz]
Irr_Offset     = 5[ppm]
Blanking       = 15[us]
Clipped        = TRUE
Scans          = 5000
Total_Scans    = 5000

Relaxation_Delay = 1[s]
Recvr_Gain       = 56
Temp_Get         = 60[dC]
X_90_Width      = 8.8[us]
X_Acq_Time      = 0.69206016[s]
X_Angle         = 30[deg]
X_Attn          = 11[dB]
X_Pulse         = 2.93333333[us]
Irr_Atn_Dec     = 26.162[db]
Irr_Atn_Dec_Calc = 26.162[db]
Irr_Atn_Dec_Default_Calc = 26.162[db]
Irr_Atn_Noise   = 26.162[db]
Irr_Dec_Bandwidth_Hz = 7.23684211[kHz]
Irr_Dec_Bandwidth_Ppm = 12.05794078[ppm]
Irr_Dec_Freq    = 600.1723046[MHz]
Irr_Dec_Merit_Factor = 2.2
Irr_Decoupling = TRUE
Irr_Noise       = TRUE
Irr_Noise       = WALTZ
Irr_Offset_Default = 5[ppm]
Irr_Pwidth      = 76[us]
Irr_Pwidth_Default = 76[us]
Irr_Pwidth_Default_Calc = 76[us]
Irr_Pwidth_Temp1 = 76[us]
Irr_Wurst       = FALSE
Decimation_Rate = 0
Experiment_Path = c:\Program Files\J
Initial_Wait    = 1[s]
Noe_Time        = 1[s]
Noe_Time_Flag   = FALSE
Relaxation_Delay_Calc = 0[s]
Relaxation_Delay_Temp = 1[s]
Repetition_Time = 1.69206016[s]
  
```

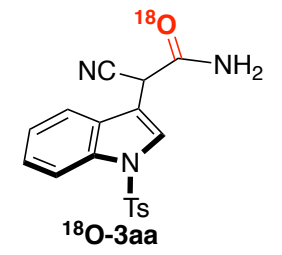

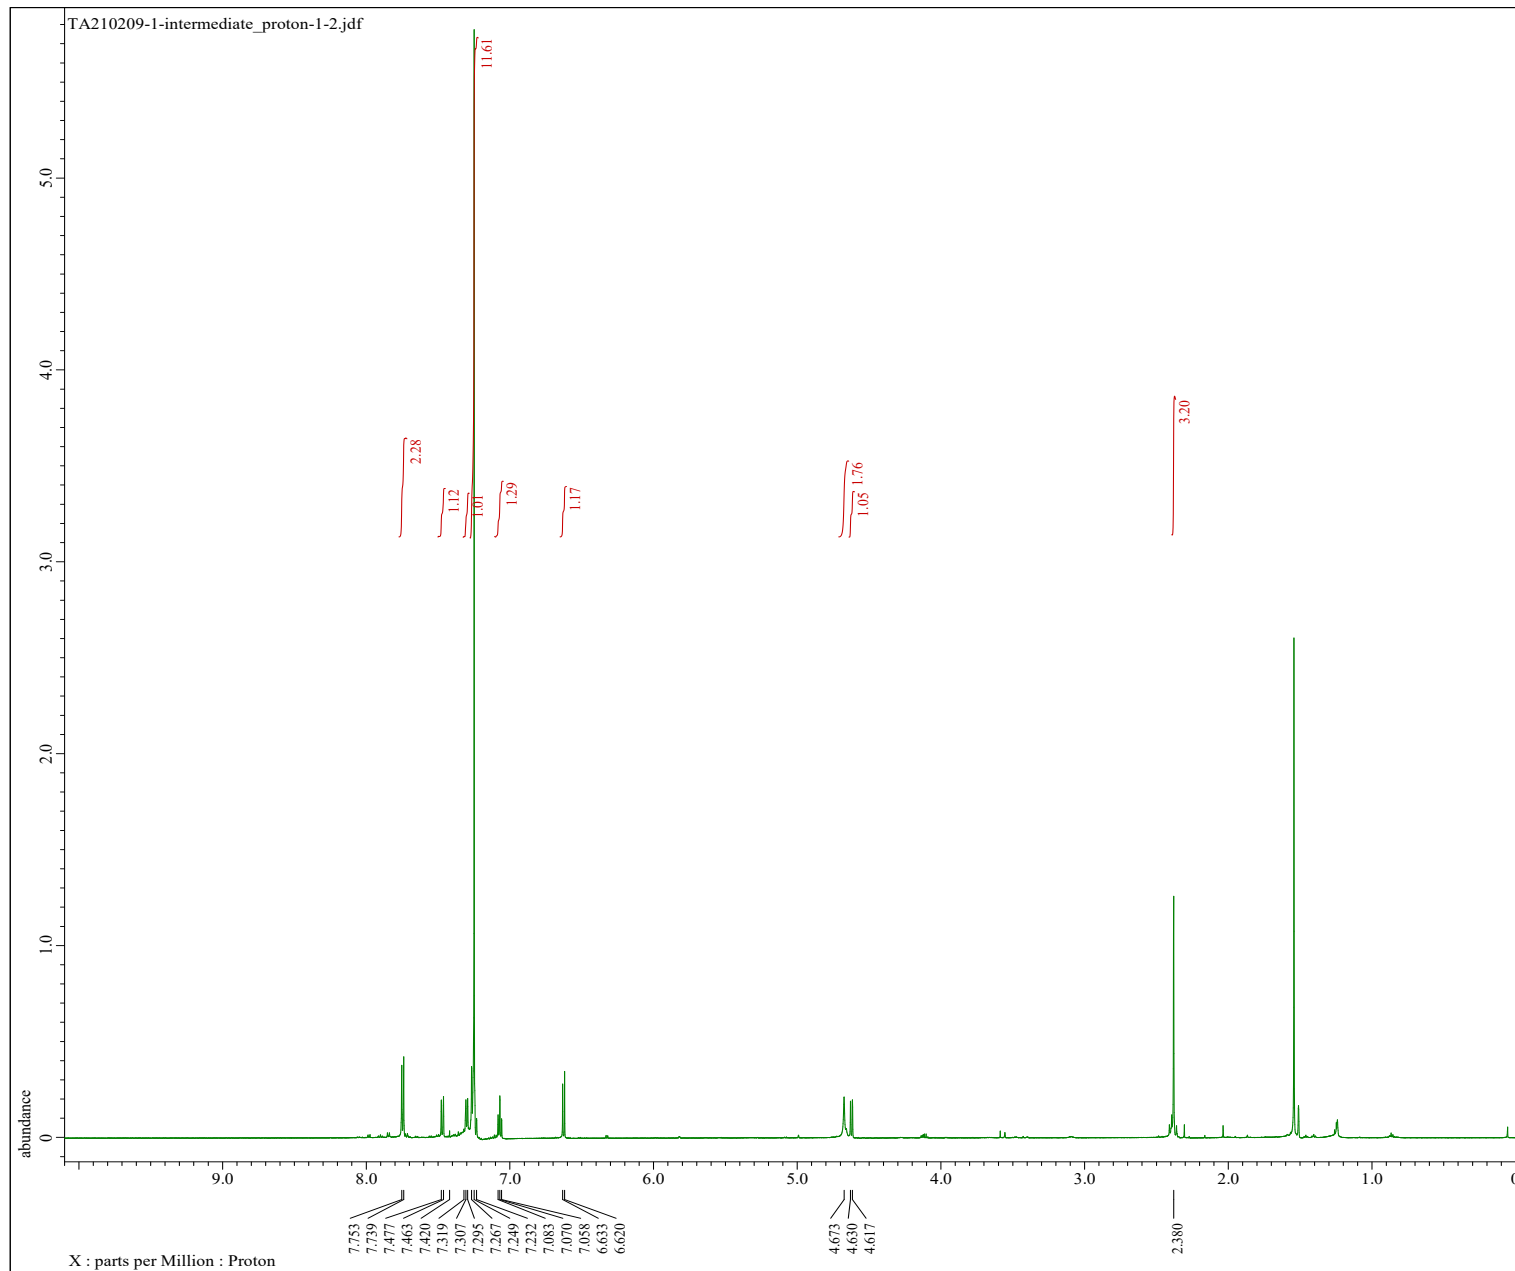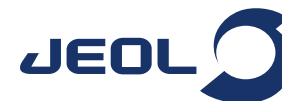

```

Filename      = TA210209-1-intermedia
Author        = delta
Experiment    = proton.jxp
Sample_Id     = TA210209-1-intermedia
Solvent       = CHLOROFORM-D
Actual_Start_Time = 9-FEB-2021 20:31:43
Revision_Time = 9-FEB-2021 20:32:46

Comment       = intermediate
Data_Format   = 1D_COMPLEX
Dim_Size      = 13107
X_Domain      = Proton
Dim_Title     = Proton
Dim_Units     = [ppm]
Dimensions    = X
Spectrometer  = JNM-ECZ600R/S3

Field_Strength = 14.09636928[T] (600[M]
X_Acq_Duration = 1.09051904[s]
X_Domain       = Proton
X_Freq         = 600.1723046[MHz]
X_Offset       = 5[ppm]
X_Points       = 16384
X_Prescans     = 1
X_Resolution   = 0.91699454[Hz]
X_Sweep        = 15.02403846[kHz]
X_Sweep_Clipped = 12.01923077[kHz]
Irr_Domain     = Proton
Irr_Freq       = 600.1723046[MHz]
Irr_Offset     = 5[ppm]
Tri_Domain     = Proton
Tri_Freq       = 600.1723046[MHz]
Tri_Offset     = 5[ppm]
Blanking       = 5[us]
Clipped        = TRUE
Scans          = 8
Total_Scans    = 8

Relaxation_Delay = 5[s]
Recvr_Gain       = 56
Temp_Get         = 20.3[dc]
X_90_Width      = 8.5[us]
X_Acq_Time      = 1.09051904[s]
X_Angle         = 45[deg]
X_Atn           = 8.1[db]
X_Pulse         = 4.75[us]
Irr_Mode        = Off
Tri_Mode        = Off
Dante_Loop      = 500
Dante_Preset    = FALSE
Decimation_Rate = 0
Experiment_Path = c:\Program Files\JEOL
Initial_Wait    = 1[s]
Phase           = (0, 90, 270, 180, 180
Preset_Time     = 5[s]
Preset_Time_Flag = FALSE
Relaxation_Delay_Calc = 0[s]
Relaxation_Delay_Temp = 5[s]
Repetition_Time = 6.09051904[s]

```

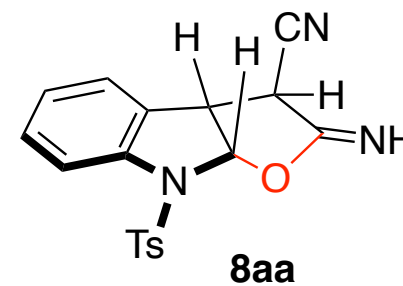

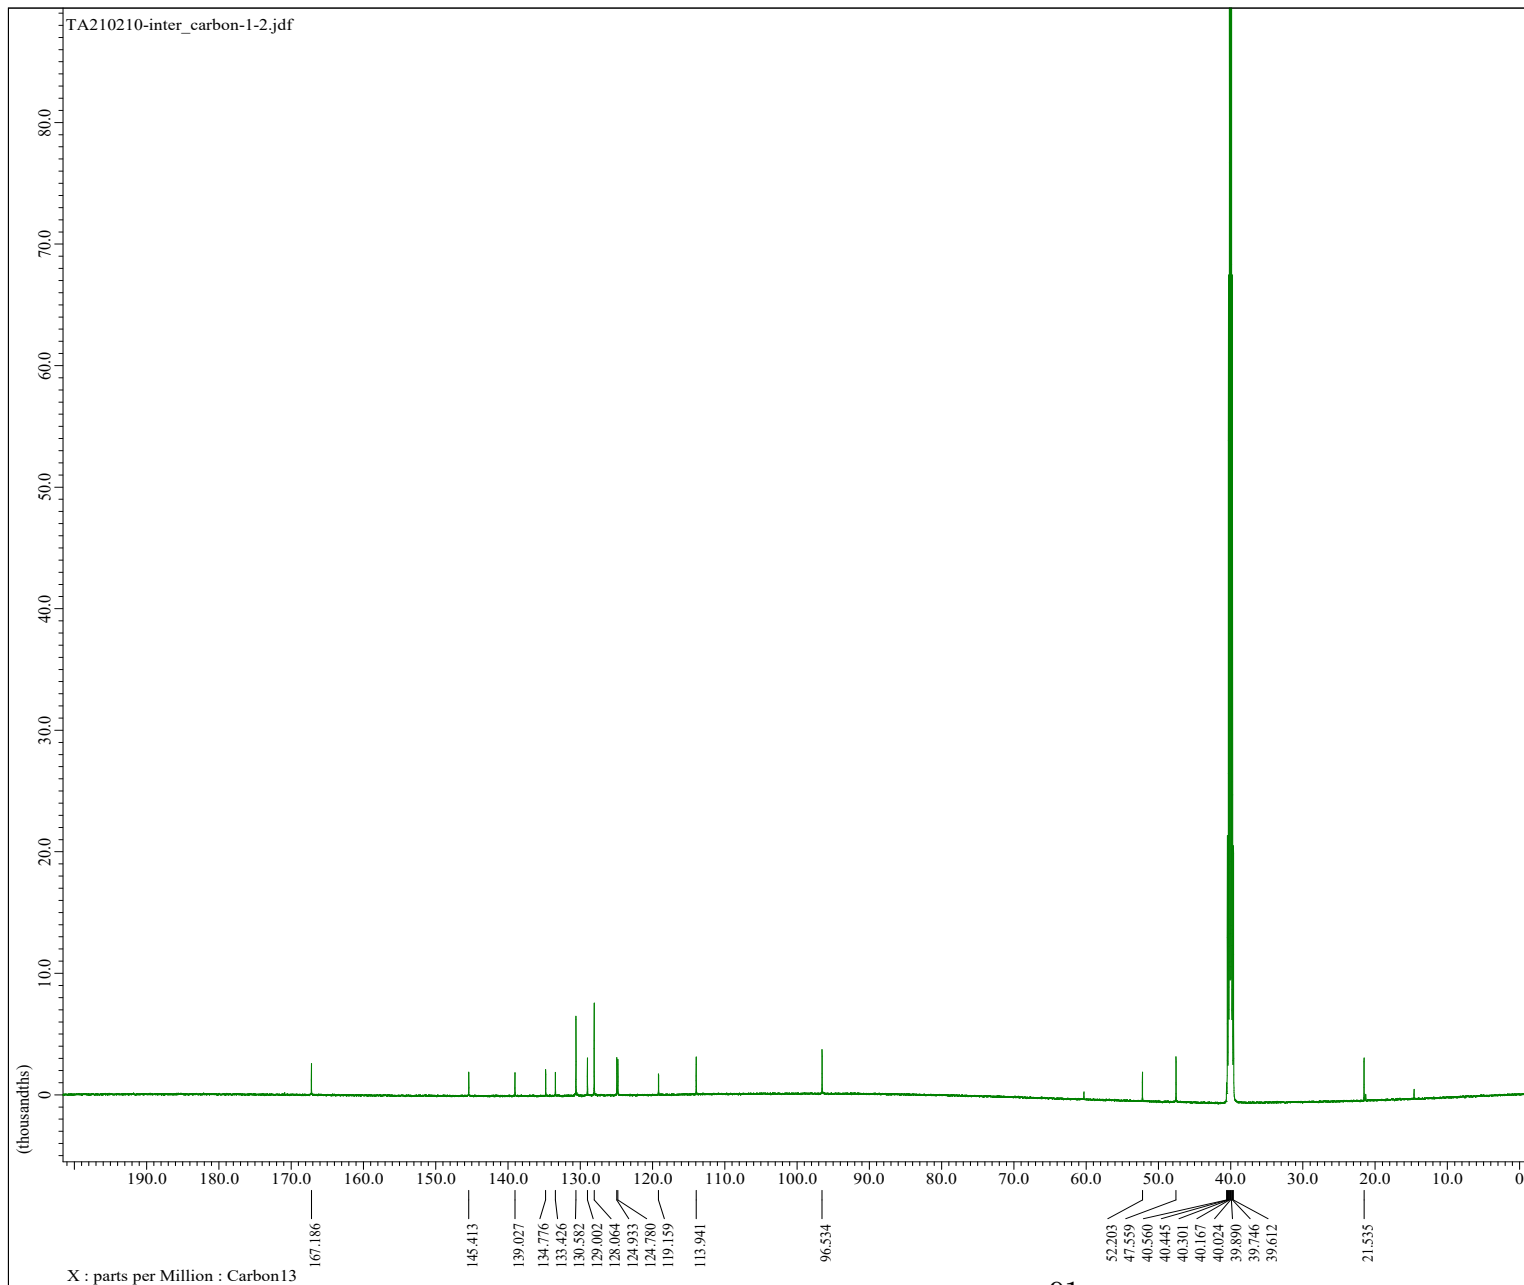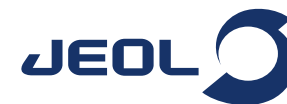

```

Filename           = TA210210-inter_car
Author             = delta
Experiment         = carbon.jxp
Sample_Id         = TA210210-inter
Solvent           = DMSO-d6
Actual_Start_Time = 10-FEB-2021 22:21:
Revision_Time     = 11-FEB-2021 13:18:

Data_Format       = 1D COMPLEX
Dim_Size         = 26214
X_Domain         = Carbon13
Dim_Title        = Carbon13
Dim_Units        = [ppm]
Dimensions       = X
Spectrometer     = JNM-ECZ600R/S3

Field_Strength   = 14.09636928[T] (60
X_Acq_Duration   = 0.69206016[s]
X_Domain         = Carbon13
X_Freq          = 150.91343039[MHz]
X_Offset        = 100[ppm]
X_Points        = 32768
X_Prescans      = 4
X_Resolution    = 1.44496109[Hz]
X_Sweep        = 47.34849485[kHz]
X_Sweep_Clipped = 37.87878788[kHz]
Irr_Domain      = Proton
Irr_Freq       = 600.1723046[MHz]
Irr_Offset     = 5[ppm]
Blanking       = 15[us]
Clipped        = FALSE
Scans          = 3000
Total_Scans    = 3000

Relaxation_Delay = 1[s]
Recvr_Gain       = 56
Temp_Get        = 20.4[dC]
X_90_Width     = 8.8[us]
X_Acq_Time     = 0.69206016[s]
X_Angle        = 30[deg]
X_Atn          = 11[dB]
X_Pulse        = 2.93333333[us]
Irr_Atn_Dec    = 26.162[dB]
Irr_Atn_Dec_Calc = 26.162[dB]
Irr_Atn_Dec_Default_Calc = 26.162[dB]
Irr_Atn_Noise  = 26.162[dB]
Irr_Dec_Bandwidth_Hz = 7.23684211[kHz]
Irr_Dec_Bandwidth_Ppm = 12.05794078[ppm]
Irr_Dec_Freq   = 600.1723046[MHz]
Irr_Dec_Merit_Factor = 2.2
Irr_Decoupling = TRUE
Irr_Noise     = TRUE
Irr_Noise     = WALTZ
Irr_Offset_Default = 5[ppm]
Irr_Pwidth    = 76[us]
Irr_Pwidth_Default = 76[us]
Irr_Pwidth_Default_Calc = 76[us]
Irr_Pwidth_Temp1 = 76[us]
Irr_Wurst    = FALSE
Decimation_Rate = 0
Experiment_Path = c:\Program Files\J
Initial_Wait   = 1[s]
Noe_Time      = 1[s]
Noe_Time_Flag = FALSE
Relaxation_Delay_Calc = 0[s]
Relaxation_Delay_Temp = 1[s]
Repetition_Time = 1.69206016[s]
  
```

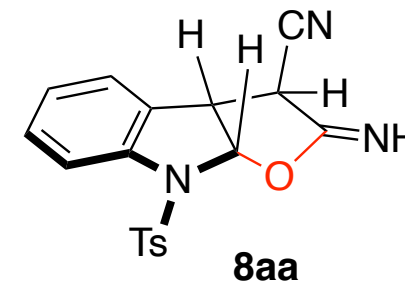

Supplement: d1cc02821a1.pdf [file d1cc02821a1.pdf]
